# Supplementary material for: Comparative proteogenomics profiling of non-small and small lung carcinoma cell lines using mass spectrometry
Source: PeerJ. 2020 Apr 23;8:e8779. doi: 10.7717/peerj.8779 (PMC7183755; doi:10.7717/peerj.8779)
Supplement: Supplemental Information 1 — (S1) All proteins identified from four different NSCLC or SCLC cell lines. (S2) Quantitative proteins among four different cell lines with at least five PSMs. (S3) Differentially expressed proteins in small-cell lung cancer (SCLC) cell lines comparing with non-small-cell lung cancer cell lines (NSCLC). (S4) Fourteen differetially expressed proteins that positively correlated with their mRNA. [file peerj-08-8779-s001.xlsx]

## Sheet: Table S1
Supplementary Table S1: All proteins identified from four different NSCLC or SCLC cell lines														NSCLC cell lines: H1975, A549 SCLC cell lines: H69, H446
Protein information						LFQ intensities of proteins in four types of cell lines				PSMs of proteins
Accession Number	Gene Name	Protein name	Score	Unique peptides	Sequence coverage [%]	A549 cells	H1975 cells	H446 cells	H69 cells	A549 cells	H1975 cells	H446 cells	H69 cells
A0AVT1	UBA6	Ubiquitin-like modifier-activating enzyme 6	57.226	0	12.7	430570000	572660000	485510000	271780000	5	50	20	8
A0FGR8	ESYT2	Extended synaptotagmin-2	15.974	3	8.3	0	112160000	0	0	3	17	1	4
A0MZ66	KIAA1598	Shootin-1	6.6643	2	6.1	0	0	0	128150000	1	1	0	13
A1L0T0	ILVBL	Acetolactate synthase-like protein	41.71	2	47.6	133230000	125070000	175250000	144900000	9	4	26	15
A1X283	SH3PXD2B	SH3 and PX domain-containing protein 2B	8.4091	6	20	0	0	220490000	0	0	0	17	0
A5YKK6	CNOT1	CCR4-NOT transcription complex subunit 1	4.2713	50	47.7	0	0	0	21191000	2	1	0	5
Q9GZQ8	MAP1LC3B	Microtubule-associated proteins 1A/1B light chain 3B	3.8907	2	15.5	0	0	0	121810000	3	6	9	8
A6NDG6	PGP	Glycerol-3-phosphate phosphatase	28.632	12	43.7	0	159630000	0	0	3	19	0	4
A6NDU8	C5orf51	UPF0600 protein C5orf51	32.561	1	27.5	0	0	124640000	0	0	0	2	0
A6NHL2	TUBAL3	Tubulin alpha chain-like 3	11.81	1	43.1	0	0	0	112440000	3	3	9	4
A6NHQ2	FBLL1	rRNA/tRNA 2'-O-methyltransferase fibrillarin-like protein 1	1.7255	17	44.3	0	0	0	279560000	2	2	2	3
A6NHR9	SMCHD1	Structural maintenance of chromosomes flexible hinge domain-containing protein 1	114.75	8	43.7	0	0	780430000	1099500000	2	1	30	88
A6NKT7	RGPD3	RanBP2-like and GRIP domain-containing protein 3	3.4617	4	17.3	0	0	0	36691000	2	0	0	4
A6ZKI3	FAM127A	Retrotransposon Gag-like protein 8B	7.735	1	19.6	0	0	0	46945000	0	0	5	6
P62308	SNRPG	Small nuclear ribonucleoprotein G	70.12	6	85.9	641770000	537820000	756290000	659480000	19	18	25	19
A8MXV4	NUDT19	Nucleoside diphosphate-linked moiety X motif 19	2.4247	5	75.2	0	0	25929000	0	0	0	6	0
P0CG08	GPR89B	Golgi pH regulator A	3.7003	1	51.4	0	0	0	33265000	0	2	3	5
Q13765	NACA	Nascent polypeptide-associated complex subunit alpha, muscle-specific form	296.68	3	5.4	2356300000	2406200000	1820900000	1444200000	42	41	19	30
E9PRG8	C11orf98	Uncharacterized protein LOC102288414	2.5954	61	77.9	0	0	0	75423000	5	5	0	4
L0R6Q1	SLC35A4	Probable UDP-sugar transporter protein SLC35A4	5.2921	4	16.1	0	0	0	196490000	2	0	0	10
O00115	DNASE2	Deoxyribonuclease-2-alpha	6.2659	1	23.4	0	0	137040000	68495000	0	0	7	6
O00116	AGPS	Alkyldihydroxyacetonephosphate synthase, peroxisomal	94.175	25	83.4	257450000	282460000	527600000	0	33	14	42	0
O00139	KIF2A	Kinesin-like protein KIF2A	92.889	50	71.1	0	0	330740000	392770000	1	1	18	40
O00148	DDX39A	ATP-dependent RNA helicase DDX39A	323.31	1	8.1	3852900000	3494800000	6039300000	9256200000	73	84	95	142
O00151	PDLIM1	PDZ and LIM domain protein 1	323.31	23	85.5	1561700000	2363200000	711020000	314490000	64	77	33	10
O00154	ACOT7	Cytosolic acyl coenzyme A thioester hydrolase	25.839	2	80	499020000	505850000	834670000	537770000	29	20	37	25
O00159	MYO1C	Unconventional myosin-Ic	129.76	1	12.1	2395000000	698250000	376170000	196570000	82	38	7	5
O00161	SNAP23	Synaptosomal-associated protein 23	3.162	1	14.8	0	0	0	0	1	1	0	0
O00165	HAX1	HCLS1-associated protein X-1	41.818	16	51.8	0	0	0	8038900	0	0	3	3
O00170	AIP	AH receptor-interacting protein	92.126	15	38.7	156240000	647180000	407310000	768900000	2	58	13	29
O00178	GTPBP1	GTP-binding protein 1	23.284	24	63	0	0	0	188240000	0	0	0	13
O00186	STXBP3	Syntaxin-binding protein 3	6.1193	12	47.5	0	0	65913000	0	1	1	9	4
O00192	ARVCF	Armadillo repeat protein deleted in velo-cardio-facial syndrome	2.0342	8	24.8	0	0	0	9048300	0	0	0	3
O00193	C11orf58	Small acidic protein	99.462	0	9.4	209940000	0	0	163230000	12	2	2	7
O00194	RAB27B	Ras-related protein Rab-27B	4.0405	4	14	18383000	0	0	0	3	1	0	0
O00203	AP3B1	AP-3 complex subunit beta-1	19.226	26	51.9	497220000	636310000	493370000	445340000	11	29	13	17
O00217	NDUFS8	NADH dehydrogenase [ubiquinone] iron-sulfur protein 8, mitochondrial	71.487	13	32.7	198730000	243530000	325640000	680990000	9	18	22	36
O00231	PSMD11	26S proteasome non-ATPase regulatory subunit 11	119.54	2	17.7	1861100000	1708500000	1573500000	1397500000	58	59	27	35
O00232	PSMD12	26S proteasome non-ATPase regulatory subunit 12	167.57	6	17.6	1465600000	1501900000	1246300000	1204900000	68	67	35	58
O00233	PSMD9	26S proteasome non-ATPase regulatory subunit 9	16.773	3	7.5	118340000	106960000	121430000	0	17	9	7	3
O00244	ATOX1	Copper transport protein ATOX1	45.949	3	17.9	412080000	707870000	450970000	222220000	21	25	16	5
O00255	MEN1	Menin	92.032	4	27	0	0	0	87567000	0	0	1	11
O00264	PGRMC1	Membrane-associated progesterone receptor component 1	240.52	11	40.8	673370000	336600000	1024100000	1383400000	30	18	40	59
O00267	SUPT5H	Transcription elongation factor SPT5	36.093	49	72.7	232610000	0	304530000	181930000	12	0	15	8
O00273	DFFA	DNA fragmentation factor subunit alpha	12.268	9	29.1	0	238280000	490760000	0	1	12	15	0
O00291	HIP1	Huntingtin-interacting protein 1	3.0715	9	22.9	0	42191000	0	0	0	4	1	0
O00299	CLIC1	Chloride intracellular channel protein 1	323.31	1	6.4	4670700000	7542700000	3792500000	3367100000	97	154	78	65
O00303	EIF3F	Eukaryotic translation initiation factor 3 subunit F	114.86	15	30.3	1491800000	1207800000	707380000	904100000	56	54	25	28
O00330	PDHX	Pyruvate dehydrogenase protein X component, mitochondrial	26.478	4	4.6	0	0	107930000	398710000	0	0	1	34
O00401	WASL	Neural Wiskott-Aldrich syndrome protein	6.2616	29	18.5	0	0	0	66331000	6	6	2	5
O00410	IPO5	Importin-5	323.31	4	4.4	2427300000	2067400000	1500600000	3244300000	138	107	75	197
O00411	POLRMT	DNA-directed RNA polymerase, mitochondrial	69.639	3	22.8	0	0	246160000	290960000	0	3	15	34
O00422	SAP18	Histone deacetylase complex subunit SAP18	21.989	9	30	0	0	491150000	535020000	3	3	14	19
O00425	IGF2BP3	Insulin-like growth factor 2 mRNA-binding protein 3	113.97	5	11.5	582110000	602870000	765440000	699480000	19	43	32	43
O00429	DNM1L	Dynamin-1-like protein	144.68	18	15.9	376980000	158850000	603330000	424880000	26	13	75	50
O00442	RTCA	RNA 3'-terminal phosphate cyclase	6.5822	5	83.4	0	0	44166000	29988000	1	0	5	8
O00461	GOLIM4	Golgi integral membrane protein 4	96.746	3	5.9	0	0	345960000	673120000	0	0	22	44
O00468	AGRN	Agrin	2.8998	12	64.7	0	0	47201000	0	0	0	4	0
O00469	PLOD2	Procollagen-lysine,2-oxoglutarate 5-dioxygenase 2	62.103	2	19.6	347680000	112740000	223630000	0	43	7	10	0
O00471	EXOC5	Exocyst complex component 5	6.0694	2	41.9	0	0	0	0	1	2	3	0
O00479	HMGN4	High mobility group nucleosomal binding domain 4	2.8296	20	52	188880000	0	0	0	3	2	0	1
O00483	NDUFA4	Cytochrome c oxidase subunit NDUFA4	9.0823	6	27.8	367260000	309830000	653630000	727280000	16	6	15	13
O00487	PSMD14	26S proteasome non-ATPase regulatory subunit 14	114.77	9	43.1	835180000	720210000	857170000	598030000	39	42	18	31
O00505	KPNA3	Importin subunit alpha-4	16.77	6	20.9	81728000	111440000	94510000	70810000	2	5	5	4
O00506	STK25	Serine/threonine-protein kinase 25	2.5395	6	11.9	0	0	0	0	2	0	0	1
O00515	LAD1	Ladinin-1	144.4	1	20.8	0	368500000	0	0	0	30	0	0
O00541	PES1	Pescadillo homolog	54.545	15	40.7	457860000	555980000	304780000	305090000	28	50	7	22
O00560	SDCBP	Syntenin-1	60.741	12	41.1	0	0	0	164650000	4	3	0	11
O00566	MPHOSPH10	U3 small nucleolar ribonucleoprotein protein MPP10	6.2472	3	13.4	0	0	40015000	0	1	0	3	0
O00567	NOP56	Nucleolar protein 56	241.43	1	19.9	1574200000	1832800000	2726200000	2264900000	77	83	102	96
O00571	DDX3X	ATP-dependent RNA helicase DDX3X	307.06	12	19.9	4774600000	3056500000	3409700000	4171100000	141	111	96	120
O00622	CYR61	Protein CYR61	107.96	3	22.6	234550000	1541500000	183560000	0	13	73	0	0
O00625	PIR	Pirin	54.762	4	10.8	588500000	0	593450000	54316000	32	0	13	5
O00629	KPNA4	Importin subunit alpha-3	176.61	1	3.8	447890000	665160000	457050000	187920000	26	54	20	5
O00712	NFIB	Nuclear factor 1 B-type	198.28	3	0	0	0	1755600000	294210000	0	0	59	6
O00743	PPP6C	Protein phosphatase 6 catalytic subunit	88.032	1	0	212210000	252820000	197180000	280180000	22	42	8	31
O00746	NME4	Nucleoside diphosphate kinase, mitochondrial	6.5635	1	0	0	0	119680000	94977000	1	0	6	4
O00754	MAN2B1	Lysosomal alpha-mannosidase	4.0906	1	0	0	0	75226000	0	0	0	6	0
O00762	UBE2C	Ubiquitin-conjugating enzyme E2 C	43.958	1	0	83730000	169100000	117400000	50570000	9	17	7	1
O00764	PDXK	Pyridoxal kinase	207.21	1	0	1368700000	755020000	203470000	579550000	72	32	9	42
O00767	SCD	Acyl-CoA desaturase	3.0916	1	0	0	0	0	48824000	3	0	0	1
O14493	CLDN4	Claudin-4	5.0111	1	0	0	125580000	0	0	0	1	0	0
O14498	ISLR	Immunoglobulin superfamily containing leucine rich repeat	4.5783	3	0	0	0	9568100	0	0	0	5	0
O14519	CDK2AP1	Cyclin-dependent kinase 2-associated protein 1	7.8244	2	0	0	0	59297000	0	1	0	4	4
O14521	SDHD	Succinate dehydrogenase [ubiquinone] cytochrome b small subunit, mitochondrial	25.706	2	0	0	0	0	11308000	0	3	1	1
O14523	C2CD2L	Phospholipid transfer protein C2CD2L	2.5286	4	0	0	0	0	14689000	0	0	0	4
Q13948	CUX1	Homeobox protein cut-like 1	2.2882	1	0	0	0	0	0	0	0	0	0
O14530	TXNDC9	Thioredoxin domain-containing protein 9	4.5669	2	0	0	0	27592000	0	1	2	2	0
O14531	DPYSL4	Dihydropyrimidinase-related protein 4	15.221	3	0	0	0	362550000	0	0	3	16	2
O14545	TRAFD1	TRAF-type zinc finger domain-containing protein 1	2.3688	1	0	0	0	30292000	0	0	1	0	1
O14548	COX7A2L	Cytochrome c oxidase subunit 7A-related protein, mitochondrial	11.528	1	0	0	0	0	23874000	3	0	0	3
O14561	NDUFAB1	Acyl carrier protein, mitochondrial	27.96	1	0	544350000	992150000	1482400000	1558700000	15	16	33	40
O14562	UBFD1	Ubiquitin domain-containing protein UBFD1	2.4763	1	0	0	0	0	0	0	0	1	0
O14579	COPE	Coatomer subunit epsilon	323.31	1	0	615830000	817390000	499550000	549920000	16	62	30	37
O14602	EIF1AY	Eukaryotic translation initiation factor 1A, Y-chromosomal	1.8838	1	0	0	0	0	16017000	0	0	0	3
O14617	AP3D1	AP-3 complex subunit delta-1	35.597	1	0	0	230150000	200730000	141840000	0	23	16	25
O14618	CCS	Copper chaperone for superoxide dismutase	8.4508	1	0	0	81536000	0	0	0	8	0	0
O14646	CHD1	Chromodomain-helicase-DNA-binding protein 1	5.2355	5	0	0	0	33259000	0	0	0	3	1
O14653	GOSR2	Golgi SNAP receptor complex member 2	3.5898	11	0	0	0	0	37013000	0	3	0	7
O14656	TOR1A	Torsin-1A	9.2104	1	0	0	0	0	66526000	0	2	0	14
O14672	ADAM10	Disintegrin and metalloproteinase domain-containing protein 10	50.619	2	0	126030000	100610000	0	88677000	3	3	0	14
O14683	TP53I11	Tumor protein p53 inducible protein 11	9.9519	1	0	0	0	183040000	147510000	0	0	8	8
O14684	PTGES	Prostaglandin E synthase	18.475	2	0	0	113440000	0	0	0	5	0	0
O14737	PDCD5	Programmed cell death protein 5	224.34	1	0	2048000000	692750000	848070000	888450000	47	28	16	25
O14744	PRMT5	Protein arginine N-methyltransferase 5	79.222	1	0	312890000	252990000	196210000	169700000	30	16	21	18
O14745	SLC9A3R1	Na(+)/H(+) exchange regulatory cofactor NHE-RF1	89.413	1	0	324220000	363510000	1763000000	0	9	19	49	1
O14770	MEIS2	Homeobox protein Meis2	2.4618	4	0	0	0	0	51614000	0	0	0	4
O14773	TPP1	Tripeptidyl-peptidase 1	51.552	3	0	150780000	172400000	317360000	233310000	6	5	16	26
O14776	TCERG1	Transcription elongation regulator 1	30.607	1	0	117220000	69342000	367030000	969900000	16	11	28	46
O14786	NRP1	Neuropilin-1	2.3672	1	0	18331000	0	0	0	2	0	0	0
O14787	TNPO2	Transportin-2	24.124	1	0	0	0	33945000	53549000	0	0	3	8
O14795	UNC13B	Protein unc-13 homolog B	3.1294	1	0	0	0	0	18637000	0	0	0	3
O14818	PSMA7	Proteasome subunit alpha type-7	237.38	4	0	2308900000	2216200000	1510400000	1263700000	84	73	54	53
O14828	SCAMP3	Secretory carrier-associated membrane protein 3	113.98	1	0	179710000	0	319010000	337130000	8	8	19	23
O14874	BCKDK	[3-methyl-2-oxobutanoate dehydrogenase [lipoamide]] kinase, mitochondrial	2.4069	1	0	0	0	0	0	0	1	1	0
O14880	MGST3	Microsomal glutathione S-transferase 3	252.04	5	0	432260000	513430000	299260000	1080600000	16	21	9	56
O14907	TAX1BP3	Tax1-binding protein 3	8.5889	23	27.4	0	129820000	0	0	2	4	1	0
O14908	GIPC1	PDZ domain-containing protein GIPC1	32.151	6	8.6	0	0	0	75635000	1	7	0	7
O14925	TIMM23	Mitochondrial import inner membrane translocase subunit Tim23	65.88	7	12	215020000	0	142360000	239040000	14	7	2	20
O14929	HAT1	Histone acetyltransferase type B catalytic subunit	40.146	7	21.8	229360000	0	310630000	281860000	26	3	23	19
O14936	CASK	Peripheral plasma membrane protein CASK	4.0932	6	11.4	0	0	0	101610000	0	5	3	9
O14949	UQCRQ	Cytochrome b-c1 complex subunit 8	36.184	6	2.7	149930000	121850000	0	261990000	9	3	0	17
P19105	MYL12A	Myosin regulatory light chain 12A	323.31	1	11.2	2291900000	4874500000	1808100000	1586900000	59	87	38	28
O14964	HGS	Hepatocyte growth factor-regulated tyrosine kinase substrate	27.507	7	32.4	168640000	200890000	343480000	0	11	27	21	1
O14966	RAB29	Ras-related protein Rab-7L1	1.7684	1	9.9	0	0	0	0	0	3	1	0
O14967	CLGN	Calmegin	94.037	1	4.7	0	0	78684000	646700000	0	0	5	30
O14974	PPP1R12A	Protein phosphatase 1 regulatory subunit 12A	32.11	1	10.3	309220000	0	479170000	542100000	4	2	11	19
O14975	SLC27A2	Very long-chain acyl-CoA synthetase	3.2205	1	6.6	0	0	0	12497000	3	0	0	2
O14976	GAK	Cyclin-G-associated kinase	5.17	30	21	0	0	0	14769000	0	4	2	3
O14979	HNRNPDL	Heterogeneous nuclear ribonucleoprotein D-like	100.82	1	8.1	1674400000	1334900000	2959800000	3526100000	43	41	49	71
O14980	XPO1	Exportin-1	215.97	1	5.3	2075800000	1797800000	2099800000	1852200000	86	98	87	91
O15020	SPTBN2	Spectrin beta chain, non-erythrocytic 2	139.5	2	23	0	59497000	0	742010000	0	0	1	63
O15027	SEC16A	Protein transport protein Sec16A	107.93	3	26.3	0	67259000	73846000	541070000	1	0	0	35
O15031	PLXNB2	Plexin-B2	76.237	3	11.2	0	0	0	205190000	0	0	2	24
O15042	U2SURP	U2 snRNP-associated SURP motif-containing protein	25.385	1	5.9	113340000	207590000	249900000	366370000	5	6	12	28
O15067	PFAS	Phosphoribosylformylglycinamidine synthase	293.68	4	33.5	2492400000	410280000	295300000	64518000	119	43	16	2
O15075	DCLK1	Serine/threonine-protein kinase DCLK1	14.087	1	10.7	0	0	0	269090000	1	2	4	18
O15091	KIAA0391	Mitochondrial ribonuclease P catalytic subunit	7.9402	5	50.5	0	0	92432000	0	0	0	5	0
O15116	LSM1	U6 snRNA-associated Sm-like protein LSm1	4.078	3	9.2	0	0	0	75240000	2	0	3	6
O15118	NPC1	Niemann-Pick C1 protein	7.6511	20	50.2	0	0	0	75048000	0	1	0	7
O15126	SCAMP1	Secretory carrier-associated membrane protein 1	46.392	9	21.1	0	0	320390000	623510000	5	0	6	27
O15143	ARPC1B	Actin-related protein 2/3 complex subunit 1B	129.57	15	59	904920000	1081200000	554800000	249030000	45	58	12	5
O15144	ARPC2	Actin-related protein 2/3 complex subunit 2	96.899	19	83.9	1281900000	1499100000	1070900000	746730000	50	57	35	30
O15145	ARPC3	Actin-related protein 2/3 complex subunit 3	66.115	11	35.3	813870000	1104300000	610740000	566840000	31	43	17	13
O15160	POLR1C	DNA-directed RNA polymerases I and III subunit RPAC1	16.947	27	32.8	0	63533000	0	66014000	4	7	4	10
O15164	TRIM24	Transcription intermediary factor 1-alpha	6.6679	2	14.7	0	0	38579000	0	0	0	3	3
O15173	PGRMC2	Membrane-associated progesterone receptor component 2	68.874	3	22.2	288520000	0	250660000	356040000	22	7	10	30
O15212	PFDN6	Prefoldin subunit 6	148.34	16	62.7	242820000	257530000	0	126460000	14	13	7	7
O15213	WDR46	WD repeat-containing protein 46	2.328	7	14.6	0	0	21523000	0	0	0	2	0
O15226	NKRF	NF-kappa-B-repressing factor	9.9831	5	11.1	0	0	62370000	0	5	2	7	2
O15230	LAMA5	Laminin subunit alpha-5	19.092	2	3.1	0	0	21320000	0	0	0	5	0
O15231	ZNF185	Zinc finger protein 185	156.22	4	29	0	585080000	0	0	0	48	0	0
O15235	MRPS12	Mitochondrial ribosomal protein S12	3.4042	1	8.7	0	0	0	21960000	0	0	3	0
O15240	VGF	Neurosecretory protein VGF	231.54	9	14.3	0	0	1561100000	859770000	0	0	62	61
O15260	SURF4	Surfeit locus protein 4	51.34	5	29	283790000	336800000	72397000	356250000	28	17	4	30
O15269	SPTLC1	Serine palmitoyltransferase 1	9.6665	22	57.6	0	0	0	175070000	4	4	3	16
O15270	SPTLC2	Serine palmitoyltransferase 2	5.9883	21	56.4	0	0	0	59321000	0	0	2	5
O15294	OGT	UDP-N-acetylglucosamine--peptide N-acetylglucosaminyltransferase 110 kDa subunit	53.595	6	31.4	0	0	0	116440000	2	2	3	16
O15305	PMM2	Phosphomannomutase 2	60.939	5	58.8	227710000	151730000	0	0	6	3	0	0
O15320	CTAGE5	Endoplasmic reticulum export factor CTAGE5	5.3019	3	8.8	0	0	0	92078000	0	0	0	6
O15344	MID1	E3 ubiquitin-protein ligase Midline-1	41.232	10	60.5	57511000	0	0	0	17	0	0	0
O15347	HMGB3	High mobility group protein B3	40.215	15	21.3	1487700000	609940000	1676200000	1881800000	40	13	32	51
O15355	PPM1G	Protein phosphatase, Mg2+/Mn2+ dependent 1G	184.91	7	28.7	895270000	887070000	1332800000	640310000	51	48	47	29
O15357	INPPL1	Phosphatidylinositol 3,4,5-trisphosphate 5-phosphatase 2	72.466	3	4.2	0	0	0	343910000	0	0	3	36
O15371	EIF3D	Eukaryotic translation initiation factor 3 subunit D	255.34	20	85.5	971480000	1093800000	733240000	802700000	60	65	23	48
O15372	EIF3H	Eukaryotic translation initiation factor 3 subunit H	132.16	11	42.3	1339000000	1469900000	923300000	803070000	60	78	30	42
O15382	BCAT2	Branched-chain-amino-acid aminotransferase, mitochondrial	60.027	8	20.2	0	0	932310000	635410000	8	0	45	37
O15394	NCAM2	Neural cell adhesion molecule 2	100.7	5	17	0	0	0	949820000	0	0	0	51
O15397	IPO8	Importin-8	174.14	39	56.7	0	0	0	1779500000	0	0	0	88
O15400	STX7	Syntaxin-7	19.574	19	26.7	0	0	0	106820000	0	0	1	11
O15438	ABCC3	Canalicular multispecific organic anion transporter 2	3.6815	8	56.9	0	0	47453000	0	5	0	1	0
O15439	ABCC4	Multidrug resistance-associated protein 4	2.9414	14	35.1	0	0	0	0	1	0	0	0
O15446	CD3EAP	DNA-directed RNA polymerase I subunit RPA34	34.73	23	51	103340000	0	125680000	68615000	1	0	5	6
O15460	P4HA2	Prolyl 4-hydroxylase subunit alpha-2	14.788	4	12.8	0	85063000	0	0	5	3	0	2
O15484	CAPN5	Calpain-5	3.299	14	24.3	0	0	38573000	0	0	0	5	0
O15498	YKT6	Synaptobrevin homolog YKT6	31.511	4	2.2	0	490530000	199730000	267040000	6	26	3	13
O15511	ARPC5	Actin-related protein 2/3 complex subunit 5	59.463	14	25.4	278300000	355030000	346550000	183880000	15	29	11	7
O15514	POLR2D	DNA-directed RNA polymerase II subunit RPB4	5.275	5	9.6	0	0	0	17451000	0	1	2	2
Q6A1A2	PDPK2P	Putative 3-phosphoinositide-dependent protein kinase 2	2.814	1	16.7	0	0	0	12898000	0	1	2	1
O15533	TAPBP	Tapasin	4.9878	4	46.9	0	0	0	0	0	2	0	0
O15540	FABP7	Fatty acid-binding protein, brain	58.474	8	46.5	0	0	1027900000	2914000000	0	0	9	34
O15551	CLDN3	Claudin-3	2.58	6	31.7	0	0	0	61496000	0	0	0	6
O43143	DHX15	Pre-mRNA-splicing factor ATP-dependent RNA helicase DHX15	147.32	1	8.9	1869900000	1276600000	2104600000	2216900000	77	65	87	118
O43148	RNMT	mRNA cap guanine-N7 methyltransferase	13.224	9	25.3	0	0	153460000	148410000	0	0	11	16
O43156	TTI1	TELO2-interacting protein 1 homolog	4.7126	15	29.4	0	0	14223000	0	0	2	3	1
O43159	RRP8	Ribosomal RNA-processing protein 8	6.7938	7	36.9	0	0	0	0	0	0	0	3
O43169	CYB5B	Cytochrome b5 type B	77.359	2	7.5	871010000	524230000	368600000	856440000	29	18	16	15
O43172	PRPF4	U4/U6 small nuclear ribonucleoprotein Prp4	48.345	30	62.3	218570000	256650000	362130000	406920000	11	25	11	35
O43175	PHGDH	D-3-phosphoglycerate dehydrogenase	323.31	33	59.4	385550000	455720000	6716000000	3396200000	22	29	127	91
O43237	DYNC1LI2	Cytoplasmic dynein 1 light intermediate chain 2	15.245	14	46.2	0	110530000	0	0	8	19	1	1
O43242	PSMD3	26S proteasome non-ATPase regulatory subunit 3	175.75	6	31.7	1283100000	1437000000	1073400000	975320000	74	99	60	66
O43251	RBFOX2	RNA binding protein fox-1 homolog 2	7.7559	9	47	0	0	59867000	81505000	0	0	7	5
O43252	PAPSS1	Bifunctional 3'-phosphoadenosine 5'-phosphosulfate synthase 1	50.229	12	49.8	226790000	0	623700000	0	1	1	24	0
O43264	ZW10	Centromere/kinetochore protein zw10 homolog	11.587	10	50.8	0	0	0	70573000	0	0	2	8
O43290	SART1	U4/U6.U5 tri-snRNP-associated protein 1	67.775	4	28.3	0	0	322380000	339920000	3	1	22	40
O43293	DAPK3	Death-associated protein kinase 3	1.6457	2	2.8	0	0	0	0	0	2	0	0
O43324	EEF1E1	Eukaryotic translation elongation factor 1 epsilon-1	44.727	5	47.5	130990000	160010000	166790000	193980000	5	5	11	17
O43347	MSI1	RNA-binding protein Musashi homolog 1	25.058	12	57.4	0	0	0	4559500	0	0	2	2
O43353	RIPK2	Receptor-interacting serine/threonine-protein kinase 2	29.161	2	10.6	0	113870000	0	0	0	13	1	0
O43390	HNRNPR	Heterogeneous nuclear ribonucleoprotein R	323.31	1	3.8	2708900000	1675000000	7140900000	5984900000	76	56	143	127
O43395	PRPF3	U4/U6 small nuclear ribonucleoprotein Prp3	8.6517	3	10	0	0	102230000	169070000	0	5	6	16
O43396	TXNL1	Thioredoxin-like protein 1	78.817	1	11.3	617450000	395530000	455970000	1031200000	18	12	14	56
O43399	TPD52L2	Tumor protein D52 like 2	323.31	2	20.8	1147300000	2526300000	1770900000	402840000	23	53	20	9
O43405	COCH	Cochlin	43.307	2	4.2	0	0	0	348480000	0	0	0	23
O43414	ERI3	ERI1 exoribonuclease family member 3	2.393	1	1.8	0	0	0	0	0	0	1	1
O43432	EIF4G3	Eukaryotic translation initiation factor 4 gamma 3	2.19	3	19	0	0	16231000	0	0	0	3	1
O43447	PPIH	Peptidyl-prolyl cis-trans isomerase H	1.6626	8	20.6	0	0	52049000	57739000	0	1	3	3
O43464	HTRA2	Serine protease HTRA2, mitochondrial	13.5	2	5.2	0	0	61225000	0	0	0	8	0
O43488	AKR7A2	Aflatoxin B1 aldehyde reductase member 2	38.359	2	40.4	0	166530000	175270000	107510000	0	10	5	10
O43491	EPB41L2	Band 4.1-like protein 2	18.075	6	23.7	34360000	0	0	0	12	0	0	0
O43504	LAMTOR5	Ragulator complex protein LAMTOR5	85.347	1	3.9	0	0	0	146460000	6	6	4	4
O43505	B3GNT1	Beta-1,4-glucuronyltransferase 1	4.1733	11	61.7	0	0	0	26265000	0	0	0	9
O43570	CA12	Carbonic anhydrase 12	84.283	1	43.8	829070000	0	0	0	32	0	0	0
O43583	DENR	Density-regulated protein	32.376	15	21.2	0	0	125360000	0	7	8	8	7
O43592	XPOT	Exportin-T	22.537	2	13.1	0	44689000	70552000	189510000	14	2	4	23
O43598	DNPH1	2'-deoxynucleoside 5'-phosphate N-hydrolase 1	87.983	3	3.2	239000000	317310000	350880000	282620000	12	18	15	17
O43602	DCX	Neuronal migration protein doublecortin	220.72	2	12.7	0	0	337240000	964750000	0	0	8	50
O43615	TIMM44	Mitochondrial import inner membrane translocase subunit TIM44	114.61	5	19.6	90957000	302180000	407040000	980260000	5	19	25	42
O43617	TRAPPC3	Trafficking protein particle complex subunit 3	10.023	6	13.1	0	0	242450000	0	8	3	14	4
O43633	CHMP2A	Charged multivesicular body protein 2a	5.2761	3	13.8	128850000	179030000	0	0	8	10	0	1
O43660	PLRG1	Pleiotropic regulator 1	10.364	2	22.4	0	0	192570000	212420000	2	1	13	10
O43663	PRC1	Protein regulator of cytokinesis 1	6.4971	9	67.2	0	0	0	0	0	0	0	1
O43665	RGS10	Regulator of G-protein signaling 10	2.9819	15	30	0	0	44747000	0	1	2	0	0
O43670	ZNF207	BUB3-interacting and GLEBS motif-containing protein ZNF207	7.9549	12	44.4	234750000	194720000	198510000	329820000	15	7	10	16
O43674	NDUFB5	NADH dehydrogenase [ubiquinone] 1 beta subcomplex subunit 5, mitochondrial	17.999	3	11.5	0	0	316550000	356900000	3	0	13	10
O43676	NDUFB3	NADH dehydrogenase [ubiquinone] 1 beta subcomplex subunit 3	3.9462	6	22.2	0	0	0	44610000	0	0	5	4
O43678	NDUFA2	NADH dehydrogenase [ubiquinone] 1 alpha subcomplex subunit 2	40.898	14	14.7	0	0	0	49044000	0	0	5	5
O43681	ASNA1	ATPase ASNA1	94.73	2	3.9	160010000	408010000	757190000	725160000	9	39	34	36
O43684	BUB3	Mitotic checkpoint protein BUB3	247.46	5	18.7	1246600000	1065400000	1201300000	1641500000	53	60	21	57
O43707	ACTN4	Alpha-actinin-4	323.31	1	1.2	50829000000	21551000000	11580000000	12910000000	660	408	189	244
O43708	GSTZ1	Maleylacetoacetate isomerase	23.117	13	60.9	0	167890000	0	95713000	1	9	0	2
O43709	WBSCR22	Probable 18S rRNA (guanine-N(7))-methyltransferase	7.3393	6	30.8	0	0	0	80414000	0	0	0	3
O43719	HTATSF1	HIV Tat-specific factor 1	124.59	2	9.2	0	74925000	218320000	720560000	2	5	8	35
O43747	AP1G1	AP-1 complex subunit gamma-1	88.551	7	69.7	325570000	318030000	68133000	108340000	28	33	1	5
O43752	STX6	Syntaxin-6	6.4305	2	25	0	0	0	0	0	0	1	0
O43760	SYNGR2	Synaptogyrin-2	2.0459	7	26.7	0	0	0	0	3	1	0	0
O43765	SGTA	Small glutamine-rich tetratricopeptide repeat-containing protein alpha	59.028	4	47.8	487250000	668560000	840940000	1110500000	14	25	32	39
O43768	ENSA	Alpha-endosulfine	88.351	7	28.4	0	159600000	0	182200000	5	8	2	6
O43776	NARS	Asparagine--tRNA ligase, cytoplasmic	323.31	5	6.5	1487000000	1436800000	1838400000	3614800000	65	78	62	117
O43795	MYO1B	Unconventional myosin-Ib	99.796	3	35.4	926630000	502380000	525730000	0	82	54	30	0
O43809	NUDT21	Cleavage and polyadenylation specificity factor subunit 5	61.435	5	56.7	538170000	544200000	882770000	1200200000	43	29	22	54
O43813	LANCL1	LanC-like protein 1	13.357	11	13.8	124080000	0	117640000	0	3	1	5	6
O43818	RRP9	U3 small nucleolar RNA-interacting protein 2	116.02	1	5.4	173070000	469640000	432980000	284750000	12	29	26	21
O43819	SCO2	Protein SCO2 homolog, mitochondrial	5.8752	11	31.5	0	116400000	0	69184000	1	1	0	8
O43823	AKAP8	A-kinase anchor protein 8	2.2391	13	17.7	0	0	0	0	0	0	1	1
O43837	IDH3B	Isocitrate dehydrogenase [NAD] subunit beta, mitochondrial	54.542	4	11	404590000	291420000	374980000	385530000	20	18	28	41
O43847	NRD1	Nardilysin	14.578	2	1.9	12566000	0	0	0	5	0	0	0
O43852	CALU	Calumenin	323.31	11	26.2	1946600000	3328700000	4639800000	3362500000	55	101	91	65
O43854	EDIL3	EGF-like repeat and discoidin I-like domain-containing protein 3	13.985	31	37.3	0	0	309740000	134400000	0	0	19	6
O43865	AHCYL1	S-adenosylhomocysteine hydrolase-like protein 1	6.3343	28	19.7	0	0	66283000	53535000	2	1	5	7
O43903	GAS2	Growth arrest-specific protein 2	21.925	15	12.3	0	0	113550000	0	0	0	4	2
O43913	ORC5	Origin recognition complex subunit 5	1.7351	9	8.5	0	0	0	9249100	0	0	2	3
O43920	NDUFS5	NADH dehydrogenase [ubiquinone] iron-sulfur protein 5	11.649	13	19.6	107010000	140800000	201100000	119930000	11	9	16	12
O60216	RAD21	Double-strand-break repair protein rad21 homolog	33.647	26	32.7	0	0	419090000	577830000	3	1	25	30
O60218	AKR1B10	Aldo-keto reductase family 1 member B10	323.31	7	14.1	73199000000	0	0	0	369	0	0	0
O60220	TIMM8A	Mitochondrial import inner membrane translocase subunit Tim8 A	57.858	3	9.6	126370000	167830000	307840000	274940000	4	7	18	11
O60231	DHX16	Putative pre-mRNA-splicing factor ATP-dependent RNA helicase DHX16	4.3388	2	17.3	0	0	0	172130000	1	0	3	4
O60232	SSSCA1	Sjoegren syndrome/scleroderma autoantigen 1	30.56	3	3.9	0	182650000	0	82914000	0	8	1	2
O60256	PRPSAP2	Phosphoribosyl pyrophosphate synthase-associated protein 2	36.863	6	34.3	115070000	56975000	638390000	184400000	9	4	43	19
O60264	SMARCA5	SWI/SNF-related matrix-associated actin-dependent regulator of chromatin subfamily A member 5	304.56	12	46	788600000	691750000	1543900000	1964100000	36	37	86	130
O60271	SPAG9	C-Jun-amino-terminal kinase-interacting protein 4	66.449	16	57	0	271380000	233150000	192460000	11	34	14	7
O60282	KIF5C	Kinesin heavy chain isoform 5C	109.08	8	42.1	0	0	716100000	1184200000	1	0	20	57
O60287	URB1	Nucleolar pre-ribosomal-associated protein 1	7.5939	6	23.4	0	0	47057000	0	1	2	1	0
O60294	LCMT2	tRNA wybutosine-synthesizing protein 4	1.9406	6	9	0	0	0	9543000	0	0	0	1
O60306	AQR	Intron-binding protein aquarius	23.395	5	32.7	85978000	118310000	124390000	202080000	3	2	5	24
O60313	OPA1	Dynamin-like 120 kDa protein, mitochondrial	161.96	4	24	172190000	494450000	524220000	1422400000	1	37	42	93
O60341	KDM1A	Lysine-specific histone demethylase 1A	52.395	1	2.8	0	0	529810000	387500000	4	3	25	37
O60361	NME2P1	Putative nucleoside diphosphate kinase	4.3214	4	6.8	0	0	999940000	0	0	0	9	0
O60427	FADS1	Fatty acid desaturase 1	4.1866	2	1.2	0	0	0	100250000	0	0	0	6
O60488	ACSL4	Long-chain-fatty-acid--CoA ligase 4	89.147	13	30	0	720130000	82871000	177370000	0	43	7	2
O60493	SNX3	Sorting nexin-3	5.8999	1	18.1	158150000	198410000	138250000	164730000	9	10	3	6
O60502	MGEA5	Protein O-GlcNAcase	15.814	20	40.2	0	115390000	0	67184000	5	17	0	8
O60506	SYNCRIP	Heterogeneous nuclear ribonucleoprotein Q	323.31	4	18.6	5645200000	5820200000	6222100000	10652000000	140	153	113	189
O60518	RANBP6	Ran-binding protein 6	5.2436	8	21.4	0	0	0	61038000	0	0	0	5
O60547	GMDS	GDP-mannose 4,6 dehydratase	9.9248	4	12.3	0	0	0	83223000	0	1	4	10
O60563	CCNT1	Cyclin-T1	1.7655	13	19.7	0	0	0	25473000	0	1	1	1
O60568	PLOD3	Procollagen-lysine,2-oxoglutarate 5-dioxygenase 3	99.212	4	26	0	603070000	682120000	0	0	35	51	0
O60610	DIAPH1	Protein diaphanous homolog 1	83.526	4	6.3	102510000	450850000	36609000	773790000	10	54	5	52
O60613	43723	Selenoprotein F	8.6915	7	14.5	0	0	37216000	0	0	0	2	4
O60664	PLIN3	Perilipin-3	323.31	13	59.5	2009800000	4291500000	1227200000	0	78	130	28	0
O60678	PRMT3	Protein arginine N-methyltransferase 3	9.7996	13	37.4	0	0	0	325420000	6	0	0	7
O60684	KPNA6	Importin subunit alpha-7	121.92	14	17.2	480210000	405070000	297180000	257150000	23	27	22	24
O60701	UGDH	UDP-glucose 6-dehydrogenase	323.31	17	46.2	20628000000	1355900000	214920000	82066000	282	99	19	0
O60716	CTNND1	Catenin delta-1	299.13	17	55.1	552610000	890830000	513810000	876120000	54	81	21	68
O60732	MAGEC1	Melanoma-associated antigen C1	1.8877	14	48	0	0	58438000	0	0	0	0	3
O60739	EIF1B	Eukaryotic translation initiation factor 1b	24.759	18	27.8	0	0	0	0	0	0	0	0
O60749	SNX2	Sorting nexin-2	25.281	21	30.1	189530000	188810000	203250000	181270000	10	3	9	13
O60762	DPM1	Dolichol-phosphate mannosyltransferase subunit 1	23.365	4	21.1	169950000	273800000	182580000	331120000	9	10	6	28
O60763	USO1	General vesicular transport factor p115	63.591	4	4.9	0	112720000	236710000	127060000	8	16	23	10
O60783	MRPS14	Mitochondrial ribosomal protein S14	6.4796	1	0.8	0	0	117690000	0	2	0	9	4
O60784	TOM1	Target of Myb protein 1	40.984	5	22.7	0	0	0	58442000	0	9	2	6
Q99879	HIST1H2BM	Histone H2B type 1-M	59.033	4	12.5	10115000000	7784200000	1120800000	17268000000	42	35	4	54
O60826	CCDC22	Coiled-coil domain-containing protein 22	3.3281	2	5.3	0	0	0	0	2	0	1	0
O60828	PQBP1	Polyglutamine-binding protein 1	30.366	8	53	0	156160000	124360000	152940000	3	5	8	10
O60831	PRAF2	PRA1 family protein 2	11.689	4	52.3	0	0	123080000	197490000	0	0	6	10
O60832	DKC1	H/ACA ribonucleoprotein complex subunit 4	133.94	1	14.1	524360000	711590000	693240000	575510000	26	53	37	36
O60841	EIF5B	Eukaryotic translation initiation factor 5B	91.873	1	4	649090000	604560000	529150000	338370000	50	42	31	15
O60869	EDF1	Endothelial differentiation-related factor 1	46.278	1	2.9	234360000	0	99966000	0	8	8	3	0
O60884	DNAJA2	DnaJ homolog subfamily A member 2	108.66	10	69.7	645330000	506260000	497360000	510240000	41	30	21	25
O60888	CUTA	Protein CutA	47.151	2	6.8	294850000	0	289830000	731880000	12	2	14	25
O60925	PFDN1	Prefoldin subunit 1	8.5049	30	50.9	0	202180000	0	0	5	14	2	1
O60936	NOL3	Nucleolar protein 3	19.771	6	15.1	0	96207000	0	0	6	9	0	0
O75027	ABCB7	ATP-binding cassette sub-family B member 7, mitochondrial	20.696	1	1.7	0	0	48364000	36367000	0	0	3	5
O75044	SRGAP2	SLIT-ROBO Rho GTPase-activating protein 2	6.8179	3	10.7	0	0	75291000	0	0	1	7	4
O75054	IGSF3	Immunoglobulin superfamily member 3	5.3281	4	45.2	0	0	0	11165000	0	0	0	3
O75083	WDR1	WD repeat-containing protein 1	323.31	10	24.7	4260600000	4937100000	2353000000	1913000000	114	192	43	41
O75116	ROCK2	Rho-associated protein kinase 2	14.663	25	63	173910000	0	0	0	13	1	3	3
O75131	CPNE3	Copine-3	114.37	8	27.4	1208400000	2142000000	1154400000	1520000000	42	98	49	68
O75150	RNF40	E3 ubiquitin-protein ligase BRE1B	26.495	25	55.1	0	0	235200000	0	0	0	9	0
O75152	ZC3H11A	Zinc finger CCCH domain-containing protein 11A	5.7374	2	6.4	0	0	91931000	24074000	0	0	7	0
O75153	CLUH	Clustered mitochondria protein homolog	64.444	9	28.5	277430000	287990000	0	0	37	23	0	1
O75165	DNAJC13	DnaJ homolog subfamily C member 13	3.6648	4	8	0	0	60182000	0	0	0	4	1
O75208	COQ9	Ubiquinone biosynthesis protein COQ9, mitochondrial	10.5	14	26	0	0	0	151480000	1	0	5	12
O75223	GGCT	Gamma-glutamylcyclotransferase	48.265	1	2.9	203380000	437820000	0	614550000	3	14	3	35
O75251	NDUFS7	NADH dehydrogenase [ubiquinone] iron-sulfur protein 7, mitochondrial	54.827	5	31	0	0	0	450480000	4	8	2	26
O75306	NDUFS2	NADH dehydrogenase [ubiquinone] iron-sulfur protein 2, mitochondrial	113.3	1	12.7	427350000	325830000	800150000	1514000000	15	11	20	72
O75312	ZPR1	Zinc finger protein ZPR1	13.843	5	14.8	0	0	129760000	0	2	2	13	1
O75323	GBAS	Protein NipSnap homolog 2	138.69	22	43.3	0	152800000	0	725610000	7	6	2	34
O75340	PDCD6	Programmed cell death protein 6	68.911	7	15.8	473960000	537790000	660760000	582670000	15	22	18	30
O75347	TBCA	Tubulin-specific chaperone A	100.94	12	50.9	1373600000	1294600000	2006100000	951060000	29	33	19	17
O75348	ATP6V1G1	V-type proton ATPase subunit G 1	94.796	11	62.1	0	48532000	61188000	74981000	5	6	0	12
O75351	VPS4B	Vacuolar protein sorting-associated protein 4B	35.29	9	22.9	0	310580000	225170000	409540000	4	20	10	37
O75352	MPDU1	Mannose-P-dolichol utilization defect 1 protein	4.8263	1	5.6	54656000	0	0	0	10	0	2	2
O75367	H2AFY	Core histone macro-H2A.1	323.31	2	5.2	1793600000	1632600000	5543600000	14299000000	56	34	87	155
O75368	SH3BGRL	SH3 domain-binding glutamic acid-rich-like protein	12.463	2	11.3	87388000	98352000	0	0	8	10	0	0
O75369	FLNB	Filamin-B	323.31	3	14	39370000000	31265000000	1698900000	5805200000	856	765	23	172
O75380	NDUFS6	NADH dehydrogenase [ubiquinone] iron-sulfur protein 6, mitochondrial	19.948	5	24	0	115480000	340770000	211500000	8	6	11	14
O75390	CS	Citrate synthase, mitochondrial	323.31	9	17.6	3012900000	4590300000	5632500000	9986100000	68	109	102	140
O75391	SPAG7	Sperm associated antigen 7	4.2449	2	59.3	0	0	0	0	0	0	0	0
O75396	SEC22B	Vesicle-trafficking protein SEC22b	67.597	5	19.8	213530000	318660000	506280000	375950000	9	15	17	23
O75400	PRPF40A	Pre-mRNA-processing factor 40 homolog A	46.584	6	27.4	357650000	494480000	534910000	502180000	17	21	28	25
O75431	MTX2	Metaxin-2	102.56	5	36.4	146210000	147880000	165140000	297230000	8	5	13	25
O75436	VPS26A	Vacuolar protein sorting-associated protein 26A	26.638	12	16.7	198980000	240340000	0	0	24	25	0	0
O75438	NDUFB1	NADH dehydrogenase [ubiquinone] 1 beta subcomplex subunit 1	3.5861	8	72.4	0	0	0	235900000	2	2	4	7
O75439	PMPCB	Mitochondrial-processing peptidase subunit beta	199.25	14	47.4	0	393990000	332360000	555700000	1	16	23	44
O75475	PSIP1	PC4 and SFRS1-interacting protein	323.31	15	36.1	619360000	232680000	7198900000	5764800000	20	13	125	108
O75477	ERLIN1	Erlin-1	19.1	6	41.7	0	37575000	0	0	5	3	0	0
O75489	NDUFS3	NADH dehydrogenase [ubiquinone] iron-sulfur protein 3, mitochondrial	118.59	4	20.3	415010000	508330000	986570000	1671400000	20	25	43	71
O75494	SRSF10	Serine/arginine-rich splicing factor 10	9.8553	6	16.9	139460000	151560000	177510000	265670000	3	3	3	13
O75506	HSBP1	Heat shock factor-binding protein 1	92.909	1	4	110050000	322150000	0	90466000	6	13	2	7
O75521	ECI2	Enoyl-CoA delta isomerase 2, mitochondrial	15.606	1	9.8	0	0	274740000	0	0	0	17	0
O75525	KHDRBS3	KH domain-containing, RNA-binding, signal transduction-associated protein 3	3.5579	5	11.3	0	0	0	71442000	0	0	0	6
O75530	EED	Polycomb protein EED	6.2752	3	23.3	0	0	126190000	114050000	0	1	4	12
O75531	BANF1	Barrier-to-autointegration factor	80.389	3	28.6	2991000000	1579000000	4046700000	3933200000	45	41	47	47
O75533	SF3B1	Splicing factor 3B subunit 1	246.86	3	32.3	1936300000	1336000000	1794000000	1765500000	106	63	101	126
O75534	CSDE1	Cold shock domain-containing protein E1	108.78	13	60.9	335170000	374390000	610840000	281180000	17	27	42	11
O75569	PRKRA	Interferon-inducible double-stranded RNA-dependent protein kinase activator A	32.292	13	49.7	0	0	177830000	122740000	0	2	15	11
O75582	RPS6KA5	Ribosomal protein S6 kinase alpha-5	11.62	47	74.8	0	0	115340000	198880000	0	0	8	12
O75592	MYCBP2	E3 ubiquitin-protein ligase MYCBP2	1.8787	4	29.6	0	15726000	0	0	2	1	0	1
O75607	NPM3	Nucleoplasmin-3	155.8	1	7.8	240860000	0	0	0	7	8	2	2
O75608	LYPLA1	Acyl-protein thioesterase 1	101.29	15	30.6	412100000	325820000	453720000	689120000	20	17	26	46
O75643	SNRNP200	U5 small nuclear ribonucleoprotein 200 kDa helicase	323.31	18	29.8	2485800000	2126300000	3211700000	2840800000	140	96	171	213
O75663	TIPRL	TIP41-like protein	27.796	1	4.3	0	153210000	209650000	131230000	4	16	11	15
O75683	SURF6	Surfeit locus protein 6	11.472	2	8.9	0	0	0	2477000	2	2	0	0
O75691	UTP20	Small subunit processome component 20 homolog	2.1455	10	39	0	0	0	0	3	0	0	0
O75694	NUP155	Nuclear pore complex protein Nup155	156.82	4	63.6	174760000	170400000	411480000	569830000	16	15	20	54
O75717	WDHD1	WD repeat and HMG-box DNA-binding protein 1	11.051	24	42.3	0	0	124870000	59869000	2	3	11	7
O75718	CRTAP	Cartilage-associated protein	10.332	26	30.7	186900000	0	384200000	222710000	8	1	9	16
O75746	SLC25A12	Calcium-binding mitochondrial carrier protein Aralar1	2.483	13	78.4	0	0	49332000	0	0	1	4	0
O75781	PALM	Paralemmin-1	4.0276	4	17.5	0	0	0	12424000	0	0	2	1
O75792	RNASEH2A	Ribonuclease H2 subunit A	6.0657	15	46.3	0	0	78605000	56764000	0	0	4	4
O75817	POP7	Ribonuclease P protein subunit p20	2.0996	3	14.7	0	0	0	0	1	2	0	1
O75821	EIF3G	Eukaryotic translation initiation factor 3 subunit G	90.903	2	2.6	1003600000	1497500000	1090100000	709070000	22	71	31	18
O75822	EIF3J	Eukaryotic translation initiation factor 3 subunit J	55.327	11	39.5	164850000	181600000	160330000	106040000	14	11	6	7
O75828	CBR3	Carbonyl reductase [NADPH] 3	17.333	4	4	0	0	107260000	124790000	6	3	6	3
O75832	PSMD10	26S proteasome non-ATPase regulatory subunit 10	14.628	18	55.2	109510000	89015000	120580000	79294000	9	10	2	0
O75844	ZMPSTE24	CAAX prenyl protease 1 homolog	32.186	12	30.6	82214000	0	83399000	58513000	5	1	8	8
O75874	IDH1	Isocitrate dehydrogenase 1, cytosolic	127.12	4	8.9	1542500000	2244500000	1691600000	188710000	79	86	49	9
O75880	SCO1	Protein SCO1 homolog, mitochondrial	4.0078	3	14.4	55967000	37251000	0	0	5	2	1	0
O75884	RBBP9	Putative hydrolase RBBP9	1.9011	3	8	0	20037000	0	0	0	1	2	0
O75886	STAM2	Signal transducing adapter molecule 2	3.5616	7	60.4	0	0	0	0	1	1	0	0
O75915	ARL6IP5	PRA1 family protein 3	68.007	3	8.9	242330000	311400000	0	141010000	7	19	2	7
O75928	PIAS2	E3 SUMO-protein ligase PIAS2	4.5831	14	30.7	0	0	0	25283000	1	0	1	1
O75934	BCAS2	Pre-mRNA-splicing factor SPF27	108.28	17	84.8	0	80694000	265960000	434120000	2	1	10	22
O75935	DCTN3	Dynactin subunit 3	5.2677	5	79.4	0	24293000	0	0	0	9	0	0
O75937	DNAJC8	DnaJ homolog subfamily C member 8	5.9723	5	8.1	0	397050000	0	0	2	6	1	0
O75940	SMNDC1	Survival of motor neuron-related-splicing factor 30	26.14	4	44.2	54080000	67155000	0	41018000	1	5	2	7
O75947	ATP5H	ATP synthase subunit d, mitochondrial	124.26	10	42.3	987210000	1149600000	3270200000	2874800000	32	37	52	71
O75955	FLOT1	Flotillin-1	57.41	29	45.2	0	0	428400000	183620000	14	0	29	20
O75964	ATP5L	ATP synthase subunit g, mitochondrial	34.564	20	22.8	315570000	233720000	1104500000	1198200000	9	6	28	28
O75976	CPD	M14 carboxypeptidases	91.901	22	45	0	27507000	30965000	388570000	0	3	2	36
O76003	GLRX3	Glutaredoxin-3	200.45	3	2	1016500000	1213500000	99511000	229230000	42	54	2	8
O76021	RSL1D1	Ribosomal L1 domain-containing protein 1	184.56	1	2.5	2213500000	2000900000	1892300000	1888200000	71	71	47	69
O76031	CLPX	ATP-dependent Clp protease ATP-binding subunit clpX-like, mitochondrial	25.864	13	15.5	125460000	0	103780000	117750000	6	0	13	16
O76038	SCGN	Secretagogin, EF-hand calcium binding protein	259.38	28	38	0	0	0	2491000000	0	1	0	84
O76054	SEC14L2	SEC14-like protein 2	10.511	12	19.7	0	56468000	0	0	0	9	0	0
O76071	CIAO1	Probable cytosolic iron-sulfur protein assembly protein CIAO1	27.278	1	66.4	0	155930000	111060000	106830000	4	14	7	5
Q4V326	GAGE2E	G antigen 2E	92.443	4	14.9	0	0	773850000	0	0	0	10	0
O76094	SRP72	Signal recognition particle subunit SRP72	253.51	18	42.3	266830000	283590000	607440000	270270000	22	32	34	29
O76095	JTB	Protein JTB	2.4551	6	33.3	0	0	0	14019000	0	0	1	3
O94760	DDAH1	N(G),N(G)-dimethylarginine dimethylaminohydrolase 1	37.693	10	15.6	0	0	903930000	0	0	0	26	1
O94766	B3GAT3	Galactosylgalactosylxylosylprotein 3-beta-glucuronosyltransferase 3	29.825	23	49.3	0	0	237650000	143170000	0	0	17	13
O94772	LY6H	Lymphocyte antigen 6H	28.376	3	6	0	0	1828300000	0	0	0	28	0
O94776	MTA2	Metastasis-associated protein MTA2	198.96	4	18	162180000	305980000	480450000	1589400000	3	15	33	84
O94811	TPPP	Tubulin polymerization-promoting protein	1.9526	1	3.6	0	0	0	0	0	0	1	0
O94813	SLIT2	Slit homolog 2 protein	2.5406	18	32.7	0	0	0	17251000	0	0	0	2
O94818	NOL4	Nucleolar protein 4	22.887	25	25	0	0	0	184140000	0	0	0	12
O94826	TOMM70A	Mitochondrial import receptor subunit TOM70	231.51	1	7.3	751390000	983500000	1327300000	1090800000	28	50	44	69
O94832	MYO1D	Unconventional myosin-Id	36.352	19	69.1	0	0	414380000	365350000	0	2	25	29
O94842	TOX4	TOX high mobility group box family member 4	3.3439	3	7.5	0	0	0	102760000	0	0	1	5
O94855	SEC24D	Protein transport protein Sec24D	2.4544	7	34.1	0	0	0	26188000	0	1	0	0
O94874	UFL1	E3 UFM1-protein ligase 1	10.859	38	83	0	76896000	0	77426000	0	5	0	9
O94880	PHF14	PHD finger protein 14	2.0148	23	35.7	0	0	0	60962000	1	0	0	2
O94888	UBXN7	UBX domain-containing protein 7	17.948	2	3.6	0	0	212870000	206350000	0	0	12	19
O94901	SUN1	SUN domain-containing protein 1	45.971	1	43.4	67627000	0	156310000	365600000	0	6	9	35
O94903	PROSC	Pyridoxal phosphate homeostasis protein	12.048	8	23.7	90661000	102460000	0	117810000	5	5	2	9
O94905	ERLIN2	Erlin-2	33.014	9	42.7	110390000	134970000	168340000	188190000	14	27	4	14
O94906	PRPF6	Pre-mRNA-processing factor 6	118.04	14	20.1	182430000	94012000	521790000	460380000	22	27	50	45
O94907	DKK1	Dickkopf-related protein 1	3.6972	2	21.9	16310000	0	0	0	8	0	0	0
O94913	PCF11	Pre-mRNA cleavage complex 2 protein Pcf11	1.6809	6	23.6	45729000	0	0	0	1	0	0	2
O94919	ENDOD1	Endonuclease domain-containing 1 protein	50.871	2	53.2	0	0	25798000	0	0	14	2	2
O94923	GLCE	D-glucuronyl C5-epimerase	2.698	1	2.2	0	0	13622000	0	0	0	4	0
O94925	GLS	Glutaminase kidney isoform, mitochondrial	323.31	4	29.8	1330500000	4304100000	2098200000	1629600000	51	187	90	79
O94973	AP2A2	AP-2 complex subunit alpha-2	95.206	3	16.9	593360000	464620000	533070000	683020000	36	26	22	61
O94979	SEC31A	Protein transport protein Sec31A	36.073	17	44	429190000	244170000	494680000	270850000	24	24	25	7
O94992	HEXIM1	Protein HEXIM1	67.488	16	19.8	299080000	0	0	0	15	0	2	1
O95071	UBR5	E3 ubiquitin-protein ligase UBR5	1.6808	5	37.8	0	0	0	3597900	0	0	0	2
O95084	PRSS23	Serine protease 23	3.3711	15	45.9	0	34089000	0	0	1	7	0	0
O95104	SCAF4	Splicing factor, arginine/serine-rich 15	118.77	3	33	58458000	0	134310000	463480000	0	0	8	32
O95139	NDUFB6	NADH dehydrogenase [ubiquinone] 1 beta subcomplex subunit 6	6.5053	5	50.8	0	0	160340000	181190000	0	0	3	12
O95159	ZFPL1	Zinc finger protein-like 1	4.2706	4	34.6	0	0	0	59568000	0	0	2	6
O95163	IKBKAP	Elongator complex protein 1	2.6705	3	6.9	0	0	0	37871000	3	3	0	2
O95167	NDUFA3	NADH dehydrogenase [ubiquinone] 1 alpha subcomplex subunit 3	7.2091	4	5.2	0	0	0	151600000	2	1	3	4
O95168	NDUFB4	NADH dehydrogenase [ubiquinone] 1 beta subcomplex subunit 4	13.378	2	3.2	0	0	178310000	176010000	5	9	8	10
O95169	NDUFB8	NADH dehydrogenase [ubiquinone] 1 beta subcomplex subunit 8, mitochondrial	10.608	27	66.7	0	0	0	74755000	0	0	4	4
O95197	RTN3	Reticulon-3	110.57	5	5.6	0	0	0	280930000	2	0	6	7
O95202	LETM1	Mitochondrial proton/calcium exchanger protein	82.769	22	51.4	377030000	506720000	581460000	489170000	20	24	28	35
O95218	ZRANB2	Zinc finger Ran-binding domain-containing protein 2	14.865	6	13.3	0	70471000	177220000	0	0	1	10	0
O95219	SNX4	Sorting nexin-4	8.3735	4	6.3	0	0	81018000	0	0	1	11	1
O95232	LUC7L3	Luc7-like protein 3	190.86	20	20.8	266270000	172070000	444670000	676620000	18	11	23	31
O95235	KIF20A	Kinesin-like protein KIF20A	14.845	3	2.3	0	0	0	9234500	0	0	0	1
O95239	KIF4A	Chromosome-associated kinesin KIF4A	29.149	4	20.8	0	0	216570000	266320000	4	2	3	13
O95249	GOSR1	Golgi SNAP receptor complex member 1	14.236	9	67	0	0	0	0	1	0	0	0
O95251	KAT7	Histone acetyltransferase KAT7	26.827	5	27.2	0	0	77592000	53087000	0	0	9	9
O95292	VAPB	Vesicle-associated membrane protein-associated protein B/C	26.234	16	55.5	0	489450000	394750000	723210000	3	25	11	22
O95295	SNAPIN	SNARE-associated protein Snapin	15.191	4	11.8	0	0	15948000	0	0	0	2	0
O95298	NDUFC2	NADH dehydrogenase [ubiquinone] 1 subunit C2	2.7822	8	45.1	0	0	0	116660000	0	0	2	5
O95299	NDUFA10	NADH dehydrogenase [ubiquinone] 1 alpha subcomplex subunit 10, mitochondrial	41.754	8	53.9	234780000	254240000	470970000	276030000	9	14	15	23
O95302	FKBP9	Peptidyl-prolyl cis-trans isomerase FKBP9	18.282	8	61.1	256090000	0	708030000	0	2	4	14	0
O95336	PGLS	6-phosphogluconolactonase	111.14	5	63.6	493570000	763550000	454970000	355120000	28	68	10	13
O95340	PAPSS2	Bifunctional 3'-phosphoadenosine 5'-phosphosulfate synthase 2	18.145	10	38.5	0	169940000	0	0	1	18	0	0
O95347	SMC2	Structural maintenance of chromosomes protein 2	118.71	4	21.1	300980000	221350000	267460000	449280000	38	18	22	56
O95352	ATG7	Ubiquitin-like modifier-activating enzyme ATG7	9.107	18	58.6	0	0	0	0	1	5	0	0
O95359	TACC2	Transforming acidic coiled-coil-containing protein 2	11.882	4	50	21354000	0	0	0	2	1	0	0
O95361	TRIM16	Tripartite motif-containing protein 16	103.9	133	74.3	1316300000	0	0	0	80	1	0	0
O95372	LYPLA2	Acyl-protein thioesterase 2	98.282	3	29.8	0	315890000	516600000	209280000	5	17	15	4
O95373	IPO7	Importin-7	230.68	22	60.1	1819000000	1120200000	1272200000	1542000000	76	56	59	108
O95379	TNFAIP8	Tumor necrosis factor alpha-induced protein 8	12.759	1	10.1	0	0	110270000	158030000	1	1	4	4
O95391	SLU7	Pre-mRNA-splicing factor SLU7	2.4451	8	47.4	0	0	0	0	0	0	1	0
O95394	PGM3	Phosphoacetylglucosamine mutase	35.788	9	11.7	93309000	150750000	0	0	0	7	1	4
O95399	UTS2	Urotensin 2	9.6371	7	56.3	0	0	0	2737500000	12	5	9	12
O95400	CD2BP2	CD2 antigen cytoplasmic tail-binding protein 2	16.179	6	29.7	0	75414000	83505000	74222000	1	5	8	8
O95409	ZIC2	Zinc finger protein ZIC 2	1.9836	2	32.8	0	0	0	28784000	0	0	0	3
O95433	AHSA1	Activator of 90 kDa heat shock protein ATPase homolog 1	199.71	14	38	1556100000	2464500000	1037100000	1192300000	74	92	34	45
O95453	PARN	Poly(A)-specific ribonuclease PARN	4.069	24	43	0	0	0	11088000	5	2	0	2
O95456	PSMG1	Proteasome assembly chaperone 1	12.514	3	23.4	0	0	79200000	99868000	2	1	9	8
O95470	SGPL1	Sphingosine-1-phosphate lyase 1	9.022	15	54.9	0	138060000	0	0	5	8	1	1
O95471	CLDN7	Claudin-7	1.9168	6	22.9	0	40590000	0	0	0	3	0	0
O95478	NSA2	Ribosome biogenesis protein NSA2 homolog	2.6909	3	72.4	462340000	0	0	210620000	6	2	1	1
O95486	SEC24A	Protein transport protein Sec24A	3.9087	6	23.9	0	0	0	0	1	1	3	2
O95502	NPTXR	Neuronal pentraxin receptor	7.2882	2	6.6	0	0	0	67216000	0	0	0	10
O95563	MPC2	Mitochondrial pyruvate carrier 2	6.1839	7	17.9	0	0	0	172410000	0	0	0	12
O95571	ETHE1	Persulfide dioxygenase ETHE1, mitochondrial	11.199	8	79.8	0	113730000	142520000	0	3	7	11	0
O95573	ACSL3	Long-chain-fatty-acid--CoA ligase 3	114.94	44	51.4	940520000	538070000	594170000	866500000	49	27	17	61
O95602	POLR1A	DNA-directed RNA polymerase I subunit RPA1	2.0928	19	27.9	0	17833000	0	0	1	2	1	0
O95639	CPSF4	Cleavage and polyadenylation specificity factor subunit 4	3.6426	7	30	0	0	27150000	0	0	0	2	3
O95671	ASMTL	N-acetylserotonin O-methyltransferase-like protein	5.4253	7	11.5	0	0	77527000	0	0	2	4	0
O95674	CDS2	Phosphatidate cytidylyltransferase 2	8.9714	3	0.7	0	0	0	63911000	0	0	0	8
O95716	RAB3D	Ras-related protein Rab-3D	2.4032	3	29.2	0	0	106830000	115280000	0	0	3	9
O95721	SNAP29	Synaptosomal-associated protein 29	10.119	8	74.8	0	123040000	108140000	0	0	10	15	0
O95747	OXSR1	Serine/threonine-protein kinase OSR1	33.547	79	48.5	0	45646000	0	0	4	8	9	3
O95757	HSPA4L	Heat shock 70 kDa protein 4L	55.721	7	36	0	0	517820000	280210000	3	4	38	19
O95758	PTBP3	Polypyrimidine tract-binding protein 3	119.18	3	12.5	205800000	231440000	0	234250000	5	15	1	20
O95777	LSM8	U6 snRNA-associated Sm-like protein LSm8	12.447	2	0.9	0	141360000	172220000	185970000	8	6	7	6
O95782	AP2A1	AP-2 complex subunit alpha-1	68.666	22	26	185010000	225860000	269300000	290940000	17	25	17	40
O95793	STAU1	Double-stranded RNA-binding protein Staufen homolog 1	47.406	9	11.9	0	108890000	0	40141000	6	16	15	5
O95801	TTC4	Tetratricopeptide repeat domain containing	2.9478	8	21.2	0	0	0	0	0	2	0	0
O95810	SDPR	Caveolae-associated protein 2	3.0175	1	11.5	0	0	109980000	0	3	0	0	0
O95816	BAG2	BAG family molecular chaperone regulator 2	53.105	4	14.7	126980000	0	279420000	61037000	16	4	13	2
O95817	BAG3	BAG family molecular chaperone regulator 3	37.824	3	13	0	371580000	148300000	0	2	40	6	0
O95819	MAP4K4	Mitogen-activated protein kinase kinase kinase kinase 4	5.1823	1	10.7	0	73449000	0	0	0	8	2	0
O95822	MLYCD	Malonyl-CoA decarboxylase, mitochondrial	1.8572	15	51.6	0	0	248850000	0	0	0	6	2
O95825	CRYZL1	Quinone oxidoreductase-like protein 1	2.1437	7	34.1	0	0	102630000	0	0	0	3	0
O95831	AIFM1	Apoptosis-inducing factor 1, mitochondrial	126.71	5	30.7	846640000	877750000	1296100000	1364700000	48	55	48	71
O95834	EML2	Echinoderm microtubule-associated protein-like 2	5.2198	4	25.7	0	0	80914000	0	0	0	9	0
O95841	ANGPTL1	Angiopoietin-related protein 1	4.4212	4	11.6	0	0	0	75992000	1	1	0	2
O95857	TSPAN13	Tetraspanin-13	8.4119	20	63.8	0	0	80111000	156230000	0	0	0	12
O95861	BPNT1	3'(2'),5'-bisphosphate nucleotidase 1	39.843	2	11	108190000	96767000	214920000	175400000	0	10	15	14
O95864	FADS2	Fatty acid desaturase 2	12.603	3	26.9	284030000	0	158430000	401510000	11	0	3	27
O95865	DDAH2	N(G),N(G)-dimethylarginine dimethylaminohydrolase 2	67.313	1	6.3	0	0	330780000	0	0	0	14	0
O95881	TXNDC12	Thioredoxin domain-containing protein 12	13.907	4	19.1	191020000	123900000	272390000	163430000	11	12	19	8
O95905	ECD	Protein ecdysoneless homolog	3.0083	2	6.1	0	0	0	0	1	0	0	0
O95926	SYF2	Pre-mRNA-splicing factor SYF2	64.928	9	66.2	0	0	0	0	0	0	0	0
O95983	MBD3	Methyl-CpG-binding domain protein 3	99.991	4	14.5	0	0	317210000	199560000	0	1	19	14
O95989	NUDT3	Diphosphoinositol polyphosphate phosphohydrolase 1	17.308	4	24.1	0	0	217950000	0	0	1	12	1
O95994	AGR2	Anterior gradient protein 2 homolog	323.31	3	25.2	1232200000	0	0	25800000000	30	0	0	172
O96000	NDUFB10	NADH dehydrogenase [ubiquinone] 1 beta subcomplex subunit 10	61.873	12	78.9	247540000	201870000	445230000	589740000	8	17	18	23
O96005	CLPTM1	Cleft lip and palate transmembrane protein 1	5.5706	10	32.8	0	0	0	0	7	0	0	0
O96008	TOMM40	Mitochondrial import receptor subunit TOM40 homolog	323.31	6	54.4	886540000	588340000	933810000	1302600000	39	24	45	67
O96011	PEX11B	Peroxisomal membrane protein 11B	2.4024	13	14.4	0	0	0	7295500	0	0	0	3
O96013	PAK4	Serine/threonine-protein kinase PAK 4	100.31	17	70.1	195130000	0	46717000	36226000	18	1	3	1
O96019	ACTL6A	Actin-like protein 6A	206.73	24	51.6	340710000	593830000	1304300000	910500000	8	33	31	47
P00167	CYB5A	Cytochrome b5	162.91	9	19.7	369560000	445730000	371850000	2038500000	14	22	7	35
P00338	LDHA	Lactate dehydrogenase A	323.31	21	68.1	50203000000	38542000000	10085000000	16785000000	318	268	125	172
P00352	ALDH1A1	Retinal dehydrogenase 1	323.31	4	18.1	113350000000	181510000	274920000	6818600000	647	0	4	137
P00367	GLUD1	Glutamate dehydrogenase 1, mitochondrial	210.01	7	32.7	1747500000	3036000000	2500400000	1638300000	70	152	63	58
P00374	DHFR	Dihydrofolate reductase	22.127	2	31.8	0	70515000	0	0	6	7	0	3
P00387	CYB5R3	NADH-cytochrome b5 reductase 3	323.31	17	36.4	238440000	1009100000	800120000	3037600000	9	53	17	63
P00390	GSR	Glutathione reductase, mitochondrial	323.31	1	8.9	3475000000	272040000	708360000	672230000	112	15	24	26
P00395	MT-CO1	Cytochrome c oxidase subunit 1	30.994	8	55.8	0	0	0	140530000	9	3	4	12
P00403	MT-CO2	Cytochrome c oxidase subunit 2	124.15	6	40.9	1154000000	968460000	1583300000	1875900000	35	34	27	28
P00414	MT-CO3	Cytochrome c oxidase subunit 3	2.5323	5	28.6	0	0	0	39758000	3	0	0	2
P00441	SOD1	Superoxide dismutase [Cu-Zn]	323.31	20	48.2	4192300000	3433900000	11242000000	4098000000	61	54	67	42
P00488	F13A1	Coagulation factor XIII A chain	4.6115	1	7.3	0	0	0	93640000	0	0	0	9
P00491	PNP	Purine nucleoside phosphorylase	323.31	2	2.3	1534400000	2881500000	4215700000	3788200000	57	117	97	105
P00492	HPRT1	Hypoxanthine-guanine phosphoribosyltransferase	323.31	4	8.6	1965400000	2528900000	2184500000	2215400000	80	90	58	64
P00505	GOT2	Aspartate aminotransferase, mitochondrial	287.91	23	54.1	3588900000	3574000000	3077600000	4353400000	86	70	45	89
P00533	EGFR	Epidermal growth factor receptor	45.914	18	23.6	276810000	125960000	0	0	40	10	0	0
P00558	PGK1	Phosphoglycerate kinase 1	323.31	2	4.2	17638000000	28274000000	22577000000	15100000000	256	339	218	192
P00568	AK1	Adenylate kinase isoenzyme 1	41.085	2	4.6	0	734390000	432070000	648440000	8	23	16	37
P00749	PLAU	Urokinase-type plasminogen activator	2.3832	6	10.1	0	0	0	0	0	2	0	0
P00813	ADA	Adenosine deaminase	26.083	3	3.4	46569000	0	0	0	5	3	0	0
P00846	MT-ATP6	ATP synthase subunit a	4.6151	7	24.5	0	0	0	173790000	7	7	3	4
P00966	ASS1	Argininosuccinate synthase	132.56	14	25.6	0	296520000	75895000	2273100000	0	28	0	82
P00973	OAS1	2'-5'-oligoadenylate synthase 1	24.425	6	29.8	0	0	136960000	0	0	0	9	0
P01034	CST3	Cystatin-C	3.0463	5	30.4	0	0	92305000	0	0	1	6	0
P01112	HRAS	GTPase HRas	2.1447	28	35.1	0	0	0	33764000	0	0	0	5
P01116	KRAS	GTPase KRas	54.77	2	7.9	81703000	0	178710000	171070000	1	1	4	28
P01344	IGF2	Insulin-like growth factor II	25.439	2	1.7	60824000	59651000	0	0	5	5	0	0
P02144	MB	Myoglobin	21.76	5	18.6	0	22536000	0	0	0	7	0	0
P02545	LMNA	Prelamin-A/C	323.31	2	5	16103000000	22189000000	10013000000	7862400000	260	342	141	137
P02656	APOC3	Apolipoprotein C-III	40.61	32	56.4	0	0	0	352580000	0	0	0	5
P02751	FN1	Fibronectin type III domain containing	9.2808	15	34.7	41281000	0	0	41585000	1	12	0	5
P02753	RBP4	Retinol-binding protein 4	1.6517	15	16.2	0	15937000	0	0	0	2	0	0
P02786	TFRC	Transferrin receptor protein 1	323.31	3	21.7	2639800000	4225200000	2326700000	1915500000	97	133	68	62
P03928	MT-ATP8	ATP synthase protein 8	7.2067	1	0.4	0	0	260180000	465660000	0	0	11	15
P04040	CAT	Catalase	51.86	3	10.2	106560000	152130000	217260000	240440000	2	7	18	28
P04062	GBA	Glucosylceramidase beta	19.145	11	17.5	0	0	217680000	184140000	1	0	13	17
P04066	FUCA1	Tissue alpha-L-fucosidase	5.5384	3	35.9	0	0	197000000	0	0	0	3	0
P04075	ALDOA	Fructose-bisphosphate aldolase A	323.31	3	11.3	29108000000	46203000000	14688000000	19603000000	278	445	198	283
P04080	CSTB	Cystatin-B	111.71	5	5	1654400000	3997100000	450760000	1537700000	29	44	11	27
P04083	ANXA1	Annexin A1	323.31	2	50	35059000000	44013000000	1949700000	3741600000	310	345	34	72
P04150	NR3C1	Glucocorticoid receptor	42.425	4	41.1	0	0	21544000	0	6	0	2	1
P04156	PRNP	Major prion protein	19.104	4	23.7	0	78066000	0	0	5	4	0	0
P04179	SOD2	Superoxide dismutase [Mn], mitochondrial	108.29	3	5	240470000	243330000	171430000	982950000	7	9	3	30
P04181	OAT	Ornithine aminotransferase, mitochondrial	294.65	12	20.3	77657000	1503500000	689690000	466480000	11	96	35	22
P04183	TK1	Thymidine kinase, cytosolic	15.261	4	13	235710000	247070000	117180000	0	18	18	4	0
P04216	THY1	Thy-1 membrane glycoprotein	4.5577	6	15.8	0	0	116050000	0	0	0	4	0
P04350	TUBB4A	Tubulin beta-4A chain	135.05	9	27.5	209580000	305820000	299110000	0	9	13	18	0
P04406	GAPDH	Glyceraldehyde-3-phosphate dehydrogenase	323.31	2	3.1	61840000000	41426000000	75274000000	69479000000	925	741	876	771
P04424	ASL	Argininosuccinate lyase	42.203	9	11	0	1143400000	22834000	20220000	0	73	0	0
P04632	CAPNS1	Calpain small subunit 1	319.24	2	11.2	1319500000	1545100000	588000000	672310000	46	41	24	38
P04637	TP53	Cellular tumor antigen p53	2.0273	5	12.8	0	0	0	0	0	3	1	0
P04731	MT1A	Metallothionein-1A	1.6855	7	35.8	0	0	0	0	0	1	0	0
P04732	MT1E	Metallothionein-1E	63.562	1	19.1	0	0	0	0	0	0	0	0
P04792	HSPB1	Heat shock protein beta-1	323.31	3	22.7	8840400000	55831000000	3560900000	3406500000	125	261	53	58
P04818	TYMS	Thymidylate synthase	58.478	9	27.3	0	0	123590000	95141000	7	1	12	16
P04843	RPN1	Dolichyl-diphosphooligosaccharide--protein glycosyltransferase subunit 1	323.31	8	21.9	3437100000	3415000000	8099900000	7631600000	114	114	141	166
P04844	RPN2	Dolichyl-diphosphooligosaccharide--protein glycosyltransferase subunit 2	323.31	13	87.2	2554400000	2363900000	3973400000	3787000000	95	93	89	146
P04899	GNAI2	Guanine nucleotide-binding protein G(i) subunit alpha-2	97.03	8	22.6	0	600200000	177830000	462760000	2	40	3	26
Q93077	HIST1H2AC	Histone H2A type 1-C	71.498	22	22.7	517240000	293740000	1816300000	1841600000	6	8	10	12
P05023	ATP1A1	Sodium/potassium-transporting ATPase subunit alpha-1	323.31	3	6.3	1836700000	2572200000	3597100000	6299500000	48	85	83	182
P05026	ATP1B1	Sodium/potassium-transporting ATPase subunit beta-1	69.093	2	1.2	0	0	324590000	1308100000	13	11	9	58
P05060	CHGB	Secretogranin-1	72.566	17	44.1	0	0	39934000	966910000	0	0	1	53
P05067	APP	Amyloid-beta A4 protein	8.4358	6	44.6	0	0	111680000	84751000	0	0	13	3
P05091	ALDH2	Aldehyde dehydrogenase, mitochondrial	15.413	28	37.1	97513000	0	121660000	0	21	0	2	0
P05114	HMGN1	Non-histone chromosomal protein HMG-14	10.707	3	28.8	578720000	333290000	794850000	681460000	3	6	7	6
P05121	SERPINE1	Plasminogen activator inhibitor 1	51.675	1	4.6	587820000	705390000	0	0	31	42	0	0
P05141	SLC25A5	ADP/ATP translocase 2	210.31	4	16.1	1850800000	1697000000	2243000000	3185500000	35	42	39	52
P05161	ISG15	Ubiquitin-like protein ISG15	5.1853	1	6.5	0	686170000	0	0	0	20	0	0
P05165	PCCA	propionyl-CoA carboxylase alpha subunit	48.527	5	29.3	0	0	0	693810000	0	0	0	38
P05166	PCCB	propionyl-CoA carboxylase beta subunit	58.86	1	6.6	0	0	113910000	803350000	0	0	1	56
P10696	ALPPL2	Alkaline phosphatase, placental like 2	4.4808	13	39.6	0	49685000	0	0	0	5	0	0
P05198	EIF2S1	Eukaryotic translation initiation factor 2 subunit 1	323.31	3	5.9	1933500000	3414600000	2658100000	2124700000	72	116	52	86
P05204	HMGN2	Non-histone chromosomal protein HMG-17	87.354	4	24	1375900000	2034900000	9965300000	8229300000	7	16	16	13
P05362	ICAM1	Intercellular adhesion molecule 1	3.5114	5	10.9	0	37279000	0	0	0	7	0	0
P05386	RPLP1	60S acidic ribosomal protein P1	323.31	1	8.1	3372900000	3621600000	3535600000	3728800000	43	24	30	23
P05387	RPLP2	60S acidic ribosomal protein P2	323.31	3	11.2	7229500000	6898400000	7964100000	5342900000	78	75	47	65
P05388	RPLP0	60S acidic ribosomal protein P0	323.31	3	3.3	6764800000	5819600000	5201300000	4752400000	123	116	85	72
P05455	SSB	Lupus La protein	175.12	2	8	2342800000	1737400000	2401000000	1160200000	100	102	88	50
P05549	TFAP2A	Transcription factor AP-2-alpha	7.038	4	40.2	0	0	0	19872000	0	0	0	5
P05556	ITGB1	Integrin beta-1	266.04	4	29.5	3175800000	1716900000	881330000	1234900000	110	86	26	54
P05771	PRKCB	Protein kinase C beta type	75.114	21	44.2	0	0	57973000	936400000	2	0	0	53
P05783	KRT18	Keratin, type I cytoskeletal 18	323.31	3	3	52815000000	23226000000	64904000	4544300000	305	210	0	63
P05937	CALB1	Calbindin	84.063	3	13	0	264970000	0	1987500000	0	7	0	58
P05976	MYL1	Myosin light chain 1/3, skeletal muscle isoform	3.8681	5	16.3	0	0	14269000	0	0	4	0	0
P06132	UROD	Uroporphyrinogen decarboxylase	49.221	3	12.8	65772000	0	0	0	2	5	10	3
P06241	FYN	Tyrosine-protein kinase Fyn	22.563	2	27.9	0	0	0	135580000	0	0	0	14
P06276	BCHE	Cholinesterase	2.5658	5	26.4	0	0	56182000	0	0	0	3	0
P06280	GLA	Galactosidase alpha	3.3401	7	27.9	0	0	0	7140400	1	0	0	4
P06396	GSN	Gelsolin	232.85	12	26.8	0	707230000	602750000	474770000	3	55	27	20
P06454	PTMA	Prothymosin alpha	323.31	9	36.8	3679800000	5097500000	6001300000	3678600000	22	30	27	18
P06493	CDK1	Cyclin-dependent kinase 1	85.165	3	37.5	1172800000	1303800000	796940000	925820000	50	61	24	53
P06576	ATP5B	ATP synthase subunit beta, mitochondrial	323.31	15	29.2	7637400000	8329900000	23596000000	25244000000	143	136	210	223
P06703	S100A6	Protein S100-A6	271.14	8	18.9	11406000000	17393000000	0	4341700000	40	47	0	20
P06730	EIF4E	Eukaryotic translation initiation factor 4E	90.045	2	7.2	439460000	345010000	451880000	321570000	16	21	13	13
P06733	ENO1	Alpha-enolase	323.31	2	5.9	54152000000	56727000000	63113000000	22635000000	497	641	710	191
P06737	PYGL	Glycogen phosphorylase, liver form	323.31	5	39.3	1187400000	2663800000	2235800000	0	36	183	101	0
P06744	GPI	Glucose-6-phosphate isomerase	323.31	13	37.4	14072000000	3948000000	3360200000	4441500000	195	96	50	92
P06748	NPM1	Nucleophosmin	323.31	1	5	17095000000	18003000000	17878000000	23103000000	106	126	88	94
P06753	TPM3	Tropomyosin alpha-3 chain	115.17	2	4.7	2205300000	3809700000	2084100000	1897800000	28	43	38	39
P06756	ITGAV	Integrin alpha-V	46.795	1	5.7	276530000	0	0	0	35	8	3	0
P06858	LPL	Lipoprotein lipase	2.4279	18	43.1	0	0	0	32872000	0	0	0	1
P06865	HEXA	Beta-hexosaminidase subunit alpha	6.2933	2	4.6	47673000	0	0	0	5	3	1	8
Q16778	HIST2H2BE	Histone H2B type 2-E	323.31	2	4.7	45297000000	31038000000	81728000000	98354000000	96	72	175	131
P07099	EPHX1	Epoxide hydrolase 1	103.89	3	21.1	867770000	482750000	322310000	463030000	69	7	8	25
P07108	DBI	Acyl-CoA-binding protein	169.88	9	38.3	1523100000	2049700000	8280400000	905210000	31	35	65	10
P07195	LDHB	Lactate dehydrogenase B	323.31	8	22.3	20756000000	9597000000	20946000000	7952600000	243	126	251	116
P07199	CENPB	Major centromere autoantigen B	49.271	4	33.3	0	0	0	47983000	1	0	4	10
P07203	GPX1	Glutathione peroxidase 1	7.2725	5	31.4	0	0	180150000	108230000	0	1	11	4
P07237	P4HB	Protein disulfide-isomerase	323.31	1	2.8	9189300000	9324900000	17580000000	20225000000	167	179	233	265
P07305	H1F0	Histone H1.0	44.723	1	11.9	639220000	661450000	873650000	1187400000	11	21	13	23
P07311	ACYP1	Acylphosphatase-1	57.416	10	42.3	0	0	766840000	292490000	2	2	31	16
P07339	CTSD	Cathepsin D	297.58	4	34.9	1703100000	2976700000	1491000000	2267200000	57	78	41	43
P07355	ANXA2	Annexin A2	323.31	11	66.9	102520000000	53254000000	25041000000	24066000000	500	419	217	228
P07384	CAPN1	Calpain-1 catalytic subunit	64.686	10	65.7	729850000	769670000	294960000	750470000	44	52	9	41
P07437	TUBB	Tubulin beta chain	323.31	3	4	8255600000	6521400000	25464000000	16844000000	55	63	112	105
P07602	PSAP	Prosaposin	169.75	13	51.5	2656800000	3372800000	4337300000	2425800000	70	79	46	47
P07686	HEXB	Beta-hexosaminidase subunit beta	244.84	2	9.3	331620000	908160000	1424000000	5879600000	7	35	43	138
P07737	PFN1	Profilin-1	323.31	7	19.8	18657000000	11686000000	14622000000	3810000000	151	109	101	53
P07741	APRT	Adenine phosphoribosyltransferase	227.72	15	53.1	1411100000	2980100000	513370000	637900000	57	61	21	21
P07814	EPRS	Bifunctional glutamate/proline--tRNA ligase	323.31	7	56	4284200000	4824000000	4700100000	5283300000	215	272	145	266
P07858	CTSB	Cathepsin B	25.939	26	82.5	751570000	826300000	438770000	204070000	31	42	14	1
P07900	HSP90AA1	Heat shock protein HSP 90-alpha	323.31	39	88	61809000000	85200000000	53355000000	56778000000	759	940	614	687
P07910	HNRNPC	Heterogeneous nuclear ribonucleoproteins C1/C2	287.98	25	59.5	8000700000	5586600000	14342000000	14907000000	92	81	94	96
P07919	UQCRH	Cytochrome b-c1 complex subunit 6, mitochondrial	149.23	2	27.3	544010000	437420000	671110000	1412000000	13	13	12	20
P07942	LAMB1	Laminin subunit beta-1	323.31	16	75.1	78663000	57155000	266630000	2581600000	5	0	23	130
P07948	LYN	Tyrosine-protein kinase Lyn	3.6939	20	65.3	0	74538000	0	0	0	5	0	0
P07954	FH	Fumarate hydratase, mitochondrial	323.31	1	6	1388900000	2730000000	6748500000	8174000000	34	77	110	106
P08047	SP1	Transcription factor Sp1	3.3755	7	48	0	0	0	0	0	0	0	0
P08123	COL1A2	Collagen alpha-2(I) chain	12.484	1	5.4	0	0	0	92631000	0	0	0	12
P08133	ANXA6	Annexin A6	184.08	6	73.4	859290000	380110000	4184300000	200200000	44	0	123	0
P08134	RHOC	Rho-related GTP-binding protein RhoC	30.722	2	4	236850000	324240000	0	0	8	21	7	0
P08138	NGFR	Tumor necrosis factor receptor superfamily member 16	63.883	20	78.9	0	0	586790000	0	0	0	24	0
P08195	SLC3A2	4F2 cell-surface antigen heavy chain	323.31	12	73.9	13642000000	3872200000	191760000	3993200000	203	98	9	85
P08236	GUSB	Beta-glucuronidase	17.241	18	57.2	0	0	0	108140000	0	0	0	10
P08237	PFKM	ATP-dependent 6-phosphofructokinase, muscle type	209.72	14	16.2	0	300400000	1538000000	612030000	5	15	58	42
P08238	HSP90AB1	Heat shock protein HSP 90-beta	323.31	39	87.8	29473000000	24667000000	23921000000	25328000000	311	295	220	218
P08240	SRPR	Signal recognition particle receptor subunit alpha	31.44	8	47.9	0	0	348060000	645670000	1	1	14	50
P08243	ASNS	Asparagine synthetase	80.209	2	6.7	730950000	808710000	337440000	860660000	42	54	5	55
P08247	SYP	Synaptophysin	2.4072	1	8.3	0	0	0	63844000	0	0	4	4
P08397	HMBS	Porphobilinogen deaminase	11.061	1	4.4	43971000	0	35507000	38223000	5	8	6	4
P08493	MGP	Matrix Gla protein	35.258	18	54.6	0	0	383200000	0	0	0	6	0
P08559	PDHA1	Pyruvate dehydrogenase E1 component subunit alpha, somatic form, mitochondrial	184.01	5	21	527490000	606160000	620330000	1349600000	31	24	17	63
P08567	PLEK	Pleckstrin	6.1892	2	19.2	0	0	0	28745000	0	0	0	4
P08574	CYC1	Cytochrome c1, heme protein, mitochondrial	227.21	2	52.4	476590000	360000000	414590000	1049600000	14	17	20	32
P08579	SNRPB2	U2 small nuclear ribonucleoprotein B'	44.184	1	52.4	442280000	399440000	638520000	582620000	24	16	23	19
P08581	MET	Hepatocyte growth factor receptor	24.932	2	13.9	0	0	0	18571000	4	7	0	1
P08621	SNRNP70	U1 small nuclear ribonucleoprotein 70 kDa	88.367	4	41.6	1103400000	891850000	1846900000	1593700000	49	34	40	44
P08651	NFIC	Nuclear factor 1 C-type	34.702	49	68.1	21973000	0	0	0	1	0	5	1
P08670	VIM	Vimentin	323.31	1	16.2	19671000000	37140000000	46885000000	683320000	488	345	248	0
P08708	RPS17	Ribosomal protein S17	277.49	7	3.9	4294600000	3589500000	2718000000	2686800000	81	57	33	48
P08754	GNAI3	Guanine nucleotide-binding protein G(k) subunit alpha	79.89	1	5	0	138710000	250650000	186730000	6	9	20	18
P08758	ANXA5	Annexin A5	323.31	29	43.3	6153500000	7454300000	6905200000	2988600000	158	184	121	89
P08865	RPSA	40S ribosomal protein SA	323.31	1	54.1	9856500000	8664000000	7417800000	7279900000	133	125	95	86
P09001	MRPL3	Mitochondrial ribosomal protein L3	13.172	3	52.9	0	235950000	410830000	175450000	2	11	22	8
P09012	SNRPA	U1 small nuclear ribonucleoprotein A	107.46	11	30	576510000	481980000	916070000	696820000	23	23	33	30
P09104	ENO2	Gamma-enolase	323.31	10	24.6	338180000	371710000	4540200000	3200600000	4	2	91	73
P09110	ACAA1	3-ketoacyl-CoA thiolase, peroxisomal	67.328	3	7.7	132650000	409710000	0	291420000	3	29	1	28
P09132	SRP19	Signal recognition particle 19 kDa protein	9.2392	28	88.7	0	0	0	76122000	2	2	4	6
P09211	GSTP1	Glutathione S-transferase P	323.31	6	79.6	12190000000	20343000000	6266600000	4380500000	97	138	74	64
P09234	SNRPC	U1 small nuclear ribonucleoprotein C	66.838	30	76.6	438790000	438290000	887320000	635300000	14	14	16	15
P09382	LGALS1	Galectin-1	323.31	3	6	4409800000	9915100000	596130000	0	53	92	9	0
P09417	QDPR	Dihydropteridine reductase	9.2016	1	4.7	0	68599000	0	0	5	5	0	0
P09429	HMGB1	High mobility group protein B1	323.31	10	60.4	7295100000	6263500000	13948000000	10874000000	83	101	92	83
P09455	RBP1	Retinol-binding protein 1	148.38	16	53.1	0	0	0	2274400000	0	0	0	79
P09471	GNAO1	Guanine nucleotide-binding protein G(o) subunit alpha	132.23	6	35.9	0	0	351930000	571530000	0	0	12	28
P09486	SPARC	SPARC	5.3833	3	24.2	0	0	54177000	0	0	0	3	0
P09493	TPM1	Tropomyosin alpha-1 chain	153.42	1	15.6	2923100000	811660000	82866000	162340000	73	26	1	5
P09496	CLTA	Clathrin light chain A	26.697	11	31.7	1162500000	685970000	1276400000	1009200000	21	12	15	17
P09497	CLTB	Clathrin light chain B	9.3219	2	71.4	0	282970000	446490000	280770000	4	26	7	10
P09525	ANXA4	Annexin A4	323.31	25	83.3	3564600000	1208100000	908780000	0	106	70	18	1
P09543	CNP	2',3'-cyclic-nucleotide 3'-phosphodiesterase	157.32	18	43.3	579220000	701610000	708500000	997220000	28	40	31	62
P09601	HMOX1	Heme oxygenase 1	75.726	14	81.7	257310000	354770000	0	0	21	40	0	0
P09622	DLD	Dihydrolipoyl dehydrogenase, mitochondrial	323.31	2	5.3	1496100000	2354300000	3092900000	3976300000	45	76	64	79
P09651	HNRNPA1	Heterogeneous nuclear ribonucleoprotein A1	323.31	1	19.7	17584000000	18042000000	35397000000	37497000000	224	206	248	247
P09661	SNRPA1	U2 small nuclear ribonucleoprotein A	172.79	1	54.1	430830000	347200000	523190000	509100000	16	17	16	42
P09669	COX6C	Cytochrome c oxidase subunit 6C	33.739	21	90.7	375540000	285030000	723010000	679830000	9	11	13	22
P09758	TACSTD2	Tumor-associated calcium signal transducer 2	55.322	9	44.1	0	523040000	0	0	0	34	0	0
P09874	PARP1	Poly [ADP-ribose] polymerase 1	323.31	29	58.8	3732200000	3854100000	22356000000	15216000000	128	135	284	301
P09936	UCHL1	Ubiquitin carboxyl-terminal hydrolase isozyme L1	323.31	19	43.7	5196600000	0	4134000000	4317100000	115	0	68	84
P09960	LTA4H	Leukotriene A-4 hydrolase	323.31	7	52.1	1849100000	1129200000	1540200000	1283000000	103	57	61	53
P09972	ALDOC	Aldolase, fructose-bisphosphate C	323.31	1	35.4	2472300000	3833100000	1524600000	1941700000	21	50	28	25
Q71UI9	H2AFV	Histone H2A.V	130.74	25	45.2	1406600000	1169500000	6134800000	3883000000	14	17	50	38
P0CG30	GSTT2B	Glutathione S-transferase theta-2B	6.4564	14	50.8	0	0	0	46735000	0	0	0	5
P0CG35	ENSG00000158427	Thymosin beta 15B	15.317	15	27.9	0	0	39668000	0	0	0	2	0
P0CG39	POTEJ	POTE ankyrin domain family member J	2.4097	7	11.6	0	0	0	0	1	1	0	2
P50225	SULT1A1	Sulfotransferase 1A1	1.8198	7	21.5	0	0	0	0	0	0	0	0
Q5DJT8	ENSG00000271449	Cancer/testis antigen family 45 member A2	131.75	3	28	0	2182100000	0	0	0	61	0	0
P0DMV9	HSPA1B	Heat shock protein family A member 1B	323.31	9	29.9	15220000000	14482000000	8916000000	8416100000	276	287	135	186
Q01081	U2AFBP	U2 small nuclear RNA auxiliary factor 1	107.25	9	63.1	380890000	302250000	578640000	761810000	19	17	19	28
P35520	ENSG00000160200	Cystathionine-beta-synthase	55.209	4	23	0	0	350690000	336390000	0	0	13	15
P0DP25	CALM3	Calmodulin 3 (phosphorylase kinase, delta)	323.31	13	24.9	8323500000	8760700000	13531000000	7174300000	65	83	99	73
P10109	FDX1	Adrenodoxin, mitochondrial	5.9652	19	49.9	0	0	168010000	196350000	0	0	10	11
P10114	RAP2A	Ras-related protein Rap-2a	2.7672	2	7.3	0	0	0	11551000	0	0	0	2
P10155	TROVE2	60 kDa SS-A/Ro ribonucleoprotein	22.973	25	73	347490000	591690000	438930000	372220000	7	11	19	26
P10253	GAA	Lysosomal alpha-glucosidase	21.919	2	35.6	0	0	153750000	77243000	1	2	11	8
P10301	RRAS	Ras-related protein R-Ras	3.526	3	6.2	248320000	0	79443000	0	12	1	0	0
P10316	HLA-A	HLA class I histocompatibility antigen, A-3 alpha chain	7.8432	4	94.7	0	0	0	50578000	3	0	0	5
P10321	HLA-C	HLA class I histocompatibility antigen, Cw-7 alpha chain	15.237	8	88.7	0	93168000	0	0	0	3	0	0
P10412	HIST1H1E	Histone H1.4	25.82	17	53	0	0	0	85695000	1	4	2	3
P10515	DLAT	Dihydrolipoamide S-acetyltransferase	215.7	22	52.9	200970000	397330000	2015900000	4213300000	14	17	64	112
P10586	PTPRF	Receptor-type tyrosine-protein phosphatase F	2.3311	1	4.6	0	0	0	0	0	0	0	1
P10589	NR2F1	COUP transcription factor 1	119.39	24	40.7	0	0	0	356170000	0	0	0	26
P10599	TXN	Thioredoxin	276.43	12	42.9	7768600000	3773200000	1361500000	988780000	111	68	23	20
P10606	COX5B	Cytochrome c oxidase subunit 5B, mitochondrial	42.503	26	77.4	969800000	813570000	2177400000	1528200000	22	36	30	48
P10619	CTSA	Lysosomal protective protein	24.727	11	51.3	0	214360000	0	0	6	13	5	1
P10620	MGST1	Microsomal glutathione S-transferase 1	84.699	1	8.2	1142200000	507370000	240350000	1667000000	36	20	11	39
P10636	MAPT	Microtubule-associated protein tau	76.519	6	42.8	0	0	488650000	329770000	0	0	23	17
P10644	PRKAR1A	cAMP-dependent protein kinase type I-alpha regulatory subunit	187.04	6	20.9	394690000	389790000	437860000	1499800000	12	21	13	73
P10645	CHGA	Chromogranin-A	46.493	3	6	0	0	343380000	519990000	0	0	10	30
P10768	ESD	S-formylglutathione hydrolase	182.73	2	6.8	817390000	570330000	1070400000	636690000	41	17	51	39
P10809	HSPD1	60 kDa heat shock protein, mitochondrial	323.31	8	33.5	25681000000	26708000000	46217000000	31608000000	411	481	522	525
P11021	HSPA5	78 kDa glucose-regulated protein	323.31	8	39.6	15716000000	18136000000	26941000000	75677000000	286	312	284	665
P11047	LAMC1	Laminin subunit gamma-1	197.09	12	56.2	120400000	0	513480000	698900000	7	0	18	64
P11117	ACP2	Acid phosphatase 2, lysosomal	5.3982	27	73.5	0	0	0	65239000	0	0	1	6
P11137	MAP2	Microtubule-associated protein 2	92.757	7	83.3	0	0	615020000	1049300000	0	0	13	43
P11142	HSPA8	Heat shock cognate 71 kDa protein	323.31	7	41	44649000000	44311000000	42218000000	43426000000	401	422	277	360
P11166	SLC2A1	Solute carrier family 2, facilitated glucose transporter member 1	63.645	31	78.6	362780000	275710000	0	0	26	20	0	3
P11171	EPB41	Protein 4.1	8.1928	35	56.1	0	0	0	69286000	0	0	3	9
P11172	UMPS	Uridine 5'-monophosphate synthase	44.902	18	49.1	323290000	405710000	281580000	244010000	23	39	14	9
P11177	PDHB	Pyruvate dehydrogenase E1 component subunit beta, mitochondrial	107.64	14	59.9	750160000	620120000	792190000	1595800000	32	25	24	42
P11182	DBT	Dihydrolipoamide branched chain transacylase E2	34.403	8	47.4	0	0	314880000	143830000	0	0	12	17
P11216	PYGB	Glycogen phosphorylase, brain form	323.31	12	17.2	3658600000	4500800000	2564100000	1890300000	156	210	82	73
P11233	RALA	Ras-related protein Ral-A	23.711	1	3.6	0	176590000	154180000	292660000	3	10	3	15
P11234	RALB	Ras-related protein Ral-B	89.758	3	5.9	0	555670000	419570000	539660000	2	31	9	17
P11279	LAMP1	Lysosome-associated membrane glycoprotein 1	99.821	2	53.2	243820000	406660000	231960000	1158900000	6	4	2	40
P11310	ACADM	Medium-chain specific acyl-CoA dehydrogenase, mitochondrial	93.988	13	43.7	0	423300000	1206500000	402130000	4	17	38	32
P11387	TOP1	DNA topoisomerase 1	93.436	10	83.9	983600000	1643300000	2834200000	1632100000	41	80	71	56
P11388	TOP2A	DNA topoisomerase 2-alpha	323.31	21	62.6	2761600000	948210000	3440500000	4296100000	167	68	126	199
P11413	G6PD	Glucose-6-phosphate 1-dehydrogenase	323.31	4	9.7	45107000000	11557000000	3418600000	2067000000	416	222	77	51
P11441	UBL4A	Ubiquitin-like protein 4A	3.1831	5	32.5	0	0	0	0	0	1	1	2
P11498	PC	Pyruvate carboxylase, mitochondrial	13.834	45	77.6	0	0	70451000	0	4	3	7	3
P11586	MTHFD1	C-1-tetrahydrofolate synthase, cytoplasmic	323.31	6	27.8	4468500000	7038800000	6856700000	6152300000	135	215	160	189
P11717	IGF2R	Cation-independent mannose-6-phosphate receptor	86.967	6	67.7	0	47544000	0	587460000	0	2	0	59
P11766	ADH5	Alcohol dehydrogenase class-3	167.86	14	43.2	769350000	712140000	1342700000	637220000	39	23	58	23
P11802	CDK4	Cyclin-dependent kinase 4	41.124	33	78.8	0	351980000	573100000	592000000	1	5	25	29
P11908	PRPS2	Ribose-phosphate pyrophosphokinase 2	96.746	17	32.6	0	251420000	314830000	472580000	10	14	18	22
P11940	PABPC1	Polyadenylate-binding protein 1	323.31	5	71.6	7450900000	7836300000	7738900000	7216400000	180	171	133	141
P12004	PCNA	Proliferating cell nuclear antigen	323.31	16	34.9	5092200000	4076700000	5638200000	6569000000	73	77	64	67
P12074	COX6A1	Cytochrome c oxidase subunit 6A1, mitochondrial	7.9819	22	39.9	0	0	733550000	0	2	0	7	0
P12081	HARS	Histidine--tRNA ligase, cytoplasmic	163.62	8	83.6	621600000	900460000	929660000	483080000	40	48	36	21
P12235	SLC25A4	ADP/ATP translocase 1	38.887	14	81.1	0	50271000	112960000	161580000	2	3	8	10
P12236	SLC25A6	ADP/ATP translocase 3	323.31	73	62.3	12115000000	9586400000	12762000000	26533000000	162	128	165	345
P12268	IMPDH2	Inosine-5'-monophosphate dehydrogenase 2	323.31	7	25.1	4648600000	9753300000	5436100000	3663000000	110	216	129	98
P12270	TPR	Nucleoprotein TPR	323.31	44	66.5	635210000	345260000	1318900000	1487800000	44	25	97	112
P12277	CKB	Creatine kinase B-type	323.31	14	41.2	0	1727900000	36872000000	16926000000	0	44	282	185
P12429	ANXA3	Annexin A3	140.6	4	38.5	1320900000	1997700000	0	0	60	97	0	0
P12532	CKMT1B	Creatine kinase, mitochondrial 1B	323.31	34	29	0	74299000	7195700000	8009800000	0	3	96	124
P12694	BCKDHA	2-oxoisovalerate dehydrogenase subunit alpha, mitochondrial	27.527	3	10	0	0	0	152760000	0	0	0	18
P12814	ACTN1	Alpha-actinin-1	323.31	21	52.9	7215200000	11668000000	3736800000	3381400000	167	235	79	76
P12830	CDH1	Cadherin-1	10.969	1	1.9	0	118430000	0	0	0	14	0	0
P12931	SRC	Proto-oncogene tyrosine-protein kinase Src	51.157	6	5.9	412800000	0	99217000	0	36	0	2	0
P12955	PEPD	Xaa-Pro dipeptidase	81.635	36	66.4	313990000	0	213900000	0	37	11	2	1
P12956	XRCC6	X-ray repair cross-complementing protein 6	323.31	3	75.1	6668600000	6508100000	7742200000	9628500000	166	208	167	205
P13010	XRCC5	X-ray repair cross-complementing protein 5	323.31	5	17.3	7689500000	8062700000	7943600000	9636300000	213	229	195	218
P13073	COX4I1	Cytochrome c oxidase subunit 4 isoform 1, mitochondrial	51.179	25	52.1	1272800000	1146200000	1704200000	2334300000	33	41	34	37
P13284	IFI30	Gamma-interferon-inducible lysosomal thiol reductase	3.6174	6	14	0	0	219180000	0	0	0	5	2
P13473	LAMP2	Lysosome-associated membrane glycoprotein 2	11.149	20	44.1	0	148500000	217570000	171270000	8	12	8	8
P13489	RNH1	Ribonuclease inhibitor	323.31	29	67	2755000000	2536400000	2382700000	1147500000	103	107	97	47
P13498	CYBA	Cytochrome b-245 light chain	3.3536	12	22.4	0	37507000	0	0	1	3	0	0
P13521	SCG2	Secretogranin-2	189.49	18	40.1	179650000	0	1155100000	2329300000	2	0	45	110
P13591	NCAM1	Neural cell adhesion molecule 1	323.31	2	7	0	0	2606100000	6862900000	0	0	49	167
P13637	ATP1A3	Sodium/potassium-transporting ATPase subunit alpha-3	12.682	4	19.1	0	0	109300000	132150000	0	0	7	8
P13639	EEF2	Elongation factor 2	323.31	2	23.3	36192000000	62437000000	38440000000	22469000000	589	810	570	359
P13667	PDIA4	Protein disulfide-isomerase A4	323.31	18	54.9	5012800000	6970800000	8007700000	12055000000	186	195	172	243
P13674	P4HA1	Prolyl 4-hydroxylase subunit alpha-1	72.927	1	7.4	0	368410000	283870000	591500000	1	26	7	51
P13693	TPT1	Translationally-controlled tumor protein	218.5	8	32.9	3540800000	4287500000	3545000000	1633700000	58	70	34	30
P13726	F3	Tissue factor	3.0482	8	51.6	0	0	23946000	0	0	1	0	0
P13796	LCP1	Plastin-2	52.343	5	5.7	0	0	153860000	517840000	0	0	2	45
P13797	PLS3	Plastin-3	323.31	15	42.3	4512900000	4181100000	66429000	1428000000	202	154	1	43
P13798	APEH	Acylamino-acid-releasing enzyme	22.068	2	13.6	123460000	439440000	162200000	68976000	3	37	13	2
P13804	ETFA	Electron transfer flavoprotein subunit alpha, mitochondrial	100.19	45	86.7	2161800000	1208900000	865300000	0	68	53	32	4
P13861	PRKAR2A	cAMP-dependent protein kinase type II-alpha regulatory subunit	140.39	9	60	148000000	340870000	185930000	171810000	5	24	14	17
P13984	GTF2F2	General transcription factor IIF subunit 2	2.8439	7	47.7	0	0	66156000	0	3	1	3	2
P13987	CD59	CD59 glycoprotein	27.754	22	75.6	527960000	672460000	336200000	522580000	16	20	5	13
P13995	MTHFD2	Bifunctional methylenetetrahydrofolate dehydrogenase/cyclohydrolase, mitochondrial	58.442	15	63.7	435150000	177840000	413010000	221840000	10	4	27	13
P14174	MIF	Macrophage migration inhibitory factor	229.13	7	31.6	2495400000	4624300000	5245900000	2872300000	16	34	32	20
P14209	CD99	CD99 antigen	4.0523	7	41.8	54046000	0	0	0	5	0	0	0
P14314	PRKCSH	Glucosidase 2 subunit beta	323.31	13	63.6	1848600000	3578700000	7925900000	8881900000	52	83	117	104
P14324	FDPS	Farnesyl pyrophosphate synthase	123.78	8	33.5	750170000	900230000	827700000	1663600000	17	29	18	38
P14406	COX7A2	Cytochrome c oxidase subunit 7A2, mitochondrial	42.673	4	45.8	353040000	339740000	1029200000	774700000	7	10	19	13
P14550	AKR1A1	Alcohol dehydrogenase [NADP(+)]	152.07	13	61	1228700000	1194100000	1019500000	1563600000	23	18	24	53
P14618	PKM	Pyruvate kinase PKM	323.31	4	25.8	77257000000	42693000000	43397000000	23111000000	592	420	330	252
P14625	HSP90B1	Endoplasmin	323.31	9	86.7	15848000000	9324700000	43405000000	71742000000	276	187	640	914
P14635	CCNB1	G2/mitotic-specific cyclin-B1	13.8	4	23	0	0	0	68925000	0	0	0	5
P14649	MYL6B	Myosin light chain 6B	131.72	13	55.8	1659800000	3858600000	1125000000	1962100000	13	20	23	57
P63162	SNRPN	Small nuclear ribonucleoprotein-associated protein N	47.711	15	80	1813400000	1520300000	2432300000	2580400000	40	45	43	46
P14735	IDE	Insulin-degrading enzyme	13.712	9	39.8	36590000	0	0	0	13	1	0	3
P14854	COX6B1	Cytochrome c oxidase subunit 6B1	143.43	1	5.3	804150000	682170000	1894500000	1497100000	29	23	34	28
P14859	POU2F1	POU domain, class 2, transcription factor 1	2.0236	9	52.8	0	0	0	0	0	0	1	0
P14866	HNRNPL	Heterogeneous nuclear ribonucleoprotein L	323.31	8	21	5995600000	4420600000	12001000000	16565000000	129	92	198	242
P14868	DARS	Aspartate--tRNA ligase, cytoplasmic	228.27	6	21.8	1822500000	2126600000	2276300000	1480400000	97	106	57	58
P14923	JUP	Junction plakoglobin	194.07	19	56.7	322320000	975810000	0	334600000	19	84	0	23
P14927	UQCRB	Cytochrome b-c1 complex subunit 7	35.589	19	50.1	281390000	0	141670000	288110000	6	7	7	19
P15104	GLUL	Glutamine synthetase	66.855	10	49.7	0	0	511230000	0	0	0	22	1
P15121	AKR1B1	Aldose reductase	323.31	20	50.3	21599000000	13130000000	4070600000	2147400000	209	178	41	33
P15151	PVR	Poliovirus receptor	22.228	26	58.1	0	59980000	0	0	5	8	1	2
P15153	RAC2	Ras-related C3 botulinum toxin substrate 2	1.6672	12	48.6	0	85100000	0	0	0	2	0	0
P15170	GSPT1	Eukaryotic peptide chain release factor GTP-binding subunit ERF3A	124.31	6	50.7	1154000000	1247000000	1493300000	1428400000	65	63	50	58
P15291	B4GALT1	Beta-1,4-galactosyltransferase 1	2.494	6	27.2	0	0	0	0	2	2	0	0
P15311	EZR	Ezrin	323.31	51	60.3	6029200000	6094100000	4400200000	2342300000	178	178	82	71
P15374	UCHL3	Ubiquitin carboxyl-terminal hydrolase isozyme L3	26.928	15	78.5	0	174640000	0	0	1	9	3	2
P15428	HPGD	15-hydroxyprostaglandin dehydrogenase [NAD(+)]	17.945	24	53.5	166450000	0	0	0	18	0	0	0
P15531	NME1	Nucleoside diphosphate kinase A	304.55	7	36.5	10814000000	8894200000	9645400000	6163500000	100	92	63	55
P15559	NQO1	NAD(P)H dehydrogenase [quinone] 1	323.31	4	53.9	17887000000	1501100000	0	0	226	49	0	0
P15586	GNS	N-acetylglucosamine-6-sulfatase	26.125	2	10.7	0	0	571860000	229260000	6	1	21	8
P15880	RPS2	Ribosomal protein S2	323.31	3	60	8268400000	6581700000	6959300000	5742200000	117	110	66	66
P15882	CHN1	N-chimaerin	4.4469	2	7.2	0	0	0	0	0	0	0	0
P15884	TCF4	Transcription factor 4	11.569	1	5.4	0	0	0	49470000	0	0	0	6
P15924	DSP	Desmoplakin	323.31	11	64	173420000	1935400000	0	1968200000	8	146	0	131
P15927	RPA2	Replication protein A 32 kDa subunit	243.79	22	64	663460000	523780000	1081500000	720280000	8	18	39	27
P15941	MUC1	Mucin-1	1.7483	10	45	0	0	0	5972700	0	0	0	1
P15954	COX7C	Cytochrome c oxidase subunit 7C, mitochondrial	6.2209	6	19.4	0	0	0	376730000	6	4	3	5
P16070	CD44	CD44 antigen	119.95	11	85.9	1508800000	1603700000	0	917520000	34	27	2	25
P16104	H2AFX	Histone H2AX	323.31	4	21.7	1823200000	1351900000	3943600000	2408600000	29	15	32	35
P16152	CBR1	Carbonyl reductase [NADPH] 1	323.31	1	45.9	2979400000	1431900000	3442800000	1886500000	110	71	76	50
P16278	GLB1	Beta-galactosidase	1.9223	10	27.7	0	0	0	0	0	0	1	1
P16383	GCFC2	GC-rich sequence DNA-binding factor 2	2.7979	7	12.6	104550000	0	0	0	3	0	1	1
P16401	HIST1H1B	Histone H1.5	118.71	3	24.3	972290000	2019400000	0	5922600000	15	36	0	56
P16402	HIST1H1D	Histone H1.3	19.395	0	33.7	0	0	0	0	0	0	0	0
P16403	HIST1H1C	Histone H1.2	306.04	1	21.6	12964000000	5397600000	27809000000	22061000000	58	38	101	76
P16422	EPCAM	Epithelial cell adhesion molecule	65.196	3	26.9	0	863370000	0	654220000	0	27	0	25
P16435	POR	NADPH--cytochrome P450 reductase	233.83	21	46.4	1218700000	1895200000	134730000	1999000000	50	82	7	102
P16519	PCSK2	Neuroendocrine convertase 2	5.4612	1	0.9	0	0	0	224650000	0	0	0	10
P16615	ATP2A2	Sarcoplasmic/endoplasmic reticulum calcium ATPase 2	323.31	11	44.7	4223000000	1767500000	5370100000	14112000000	112	45	106	263
P16870	CPE	Carboxypeptidase E	121.13	10	88.6	0	0	2593400000	874590000	0	0	78	47
P16930	FAH	Fumarylacetoacetase	11.666	10	66.7	0	65986000	0	0	5	4	0	0
P16949	STMN1	Stathmin	323.31	6	19.8	1083400000	689330000	10914000000	2223600000	32	28	78	46
P16989	YBX3	Y-box-binding protein 3	195.03	6	30.3	609280000	717510000	288840000	0	33	27	6	0
P17028	ZNF24	Zinc finger protein 24	2.4217	5	10.8	0	0	0	123580000	0	0	1	7
P17050	NAGA	Alpha-N-acetylgalactosaminidase	2.2674	13	45.7	0	0	0	33525000	0	0	0	5
P17066	HSPA6	Heat shock 70 kDa protein 6	47.276	9	33	0	0	0	3069000000	15	24	11	12
P17096	HMGA1	High mobility group protein HMG-I/HMG-Y	167.12	10	68.4	1015300000	1747400000	2752500000	1261500000	32	47	40	33
P17174	GOT1	Aspartate aminotransferase, cytoplasmic	133.95	52	81.8	733110000	1400900000	682370000	1119100000	25	90	28	74
P17252	PRKCA	Protein kinase C alpha type	9.6192	44	56.4	73034000	0	0	113690000	1	0	0	6
P17301	ITGA2	Integrin alpha-2	26.86	22	20.7	0	170630000	0	0	0	31	0	0
P17480	UBTF	Nucleolar transcription factor 1	44.259	5	14.4	433190000	317130000	698830000	636270000	12	14	30	42
P17568	NDUFB7	NADH dehydrogenase [ubiquinone] 1 beta subcomplex subunit 7	5.4979	13	10.6	63671000	85364000	107430000	107710000	2	7	8	7
P17600	SYN1	Synapsin-1	4.3048	32	68.9	0	0	0	60925000	0	0	0	3
P17612	PRKACA	cAMP-dependent protein kinase catalytic subunit alpha	18.602	6	12.6	0	201850000	274810000	453350000	1	6	9	31
P17655	CAPN2	Calpain-2 catalytic subunit	323.31	3	9.7	2763600000	3436200000	77840000	34237000	126	137	4	0
P17677	GAP43	Neuromodulin	323.31	11	39.8	0	0	3455000000	0	0	0	64	2
P17812	CTPS1	CTP synthase 1	248.05	13	49.6	1987000000	954910000	1254800000	1616100000	99	64	37	81
P17844	DDX5	Probable ATP-dependent RNA helicase DDX5	323.31	9	26.1	4399700000	3266000000	6167900000	6185000000	150	117	124	145
P17858	PFKL	ATP-dependent 6-phosphofructokinase, liver type	173.89	37	57.9	194840000	548670000	742120000	743220000	8	27	33	43
P17931	LGALS3	Galectin-3	67.387	3	38.3	441100000	1695000000	0	0	16	45	0	0
P17980	PSMC3	26S proteasome regulatory subunit 6A	307.11	4	43.2	1302100000	1124900000	1457600000	1269700000	76	59	61	66
P17987	TCP1	T-complex protein 1 subunit alpha	323.31	8	22.8	6076000000	5646100000	3183500000	5331200000	155	137	72	124
P18031	PTPN1	Tyrosine-protein phosphatase non-receptor type 1	76.994	13	38.2	270260000	365460000	320300000	302680000	4	26	17	28
P18065	IGFBP2	Insulin-like growth factor-binding protein 2	35.726	30	41.3	0	0	119760000	419980000	0	0	4	23
P18077	RPL35A	60S ribosomal protein L35a	25.197	48	45.6	2025200000	1833300000	1372200000	1545800000	31	37	14	21
P18084	ITGB5	Integrin beta-5	11.96	50	90.1	199670000	0	0	0	26	0	0	0
P18085	ARF4	ADP-ribosylation factor 4	28.815	3	22.3	448950000	704990000	404460000	415650000	33	40	13	12
P18124	RPL7	60S ribosomal protein L7	323.31	8	9.7	6846200000	6702300000	5966100000	5023100000	134	96	85	81
P18206	VCL	Vinculin	323.31	44	63.6	10202000000	7607300000	2127500000	646260000	303	254	63	20
P18583	SON	Protein SON	24.67	28	15.1	80189000	112190000	271600000	814640000	0	6	15	41
P18615	NELFE	Negative elongation factor E	11.035	11	44.1	0	0	0	42638000	0	3	1	8
P18621	RPL17	60S ribosomal protein L17	244.33	10	55.8	3807800000	3669800000	3799400000	3220400000	75	84	52	49
P18669	PGAM1	Phosphoglycerate mutase 1	323.31	3	50	10420000000	12132000000	5602400000	4784700000	167	184	99	89
P18754	RCC1	Regulator of chromosome condensation	234.38	23	58.2	595800000	855480000	721770000	628270000	20	49	28	28
P18858	LIG1	DNA ligase 1	99.577	13	59.4	183310000	0	389210000	184160000	14	1	33	15
P18859	ATP5J	ATP synthase-coupling factor 6, mitochondrial	183.39	2	43.1	331140000	409240000	1023600000	1065700000	11	18	17	21
P18887	XRCC1	DNA repair protein XRCC1	14.766	13	42.4	0	0	193370000	237190000	1	0	8	26
P19021	PAM	Peptidyl-glycine alpha-amidating monooxygenase	15.177	5	58.4	0	0	0	35153000	0	0	2	10
P19086	GNAZ	Guanine nucleotide-binding protein G(z) subunit alpha	4.3685	7	73.2	0	0	0	56496000	0	0	0	6
P19174	PLCG1	1-phosphatidylinositol 4,5-bisphosphate phosphodiesterase gamma-1	20.768	26	69.1	0	0	1373200000	0	0	0	13	3
P19338	NCL	Nucleolin	323.31	45	26.6	14397000000	14628000000	17670000000	11545000000	257	233	211	177
P19367	HK1	Hexokinase-1	273.71	22	74.8	319310000	1053500000	1640900000	2250800000	7	58	86	68
P19387	POLR2C	DNA-directed RNA polymerase II subunit RPB3	9.4427	19	68.7	0	0	0	58423000	4	0	9	6
P19388	POLR2E	DNA-directed RNA polymerases I, II, and III subunit RPABC1	82.227	17	58	306280000	0	297440000	239290000	11	2	20	16
P19404	NDUFV2	NADH dehydrogenase [ubiquinone] flavoprotein 2, mitochondrial	18.199	7	27.2	156040000	159940000	354400000	312580000	7	9	19	24
P19525	EIF2AK2	Interferon-induced, double-stranded RNA-activated protein kinase	20.311	41	75.4	152000000	150020000	202060000	120450000	25	23	17	9
P19623	SRM	Spermidine synthase	154.3	6	9.1	500630000	942260000	548810000	470070000	22	46	25	19
P19784	CSNK2A2	Casein kinase II subunit alpha	5.3947	11	36.6	153860000	0	0	0	7	0	0	4
P19971	TYMP	Thymidine phosphorylase	27.913	10	29.2	0	130740000	0	0	0	9	0	0
P20020	ATP2B1	Plasma membrane calcium-transporting ATPase 1	243.1	39	65.2	221580000	115760000	74195000	1678800000	19	3	8	83
P20042	EIF2S2	Eukaryotic translation initiation factor 2 subunit 2	72.768	44	70.8	1039200000	1397500000	986300000	977980000	53	68	25	35
P20073	ANXA7	Annexin A7	182.01	11	53.3	780450000	1211300000	345750000	1027900000	35	62	12	43
P20290	BTF3	Transcription factor BTF3	323.31	1	4.4	1473700000	1147800000	766750000	595890000	62	67	10	24
P20336	RAB3A	Ras-related protein Rab-3A	68.594	3	7.1	0	0	351380000	693020000	0	1	10	35
P20337	RAB3B	Ras-related protein Rab-3B	2.6717	21	70.5	0	0	0	0	0	0	0	2
P20338	RAB4A	Ras-related protein Rab-4A	11.033	1	15.9	0	0	0	787090000	1	0	1	15
P20339	RAB5A	Ras-related protein Rab-5A	8.5565	23	50.7	82885000	81185000	54332000	61677000	5	6	1	2
P20340	RAB6A	Ras-related protein Rab-6A	117.41	28	39.2	1014400000	736220000	1141900000	1753800000	14	24	20	42
P20618	PSMB1	Proteasome subunit beta type-1	261.08	3	23.2	1520300000	1635000000	1144900000	1052200000	61	57	25	40
P20645	M6PR	Cation-dependent mannose-6-phosphate receptor	47.712	62	78.9	232890000	0	248130000	146540000	12	2	14	0
P20674	COX5A	Cytochrome c oxidase subunit 5A, mitochondrial	83.386	48	61.1	1829400000	1921700000	3404400000	3226000000	46	46	32	62
P20700	LMNB1	Lamin-B1	323.31	19	43.6	3083500000	2903300000	13582000000	15710000000	92	83	216	253
P20711	DDC	Aromatic-L-amino-acid decarboxylase	14.952	9	45.9	0	0	0	465980000	0	0	0	13
P20810	CAST	Calpastatin	140.78	1	3.4	771380000	911510000	299420000	402800000	45	54	9	28
P20839	IMPDH1	Inosine-5'-monophosphate dehydrogenase 1	33.957	12	38.3	0	213300000	0	0	2	20	0	0
P20936	RASA1	Ras GTPase-activating protein 1	5.4139	29	65.2	0	0	0	13671000	0	3	0	1
P20962	PTMS	Parathymosin	59.814	10	18.6	1644900000	880380000	3127100000	1577500000	24	10	20	21
P21127	CDK11B	Cyclin-dependent kinase 11B	16.689	14	63.4	0	0	220630000	110520000	0	8	16	16
P21266	GSTM3	Glutathione S-transferase Mu 3	49.118	12	49.3	0	0	1027400000	0	0	0	41	1
P21281	ATP6V1B2	V-type proton ATPase subunit B, brain isoform	123.16	2	9.6	411090000	341490000	1045300000	1494900000	24	14	62	108
P21283	ATP6V1C1	V-type proton ATPase subunit C 1	36.413	3	25	0	66157000	50048000	62167000	4	13	2	7
P21291	CSRP1	Cysteine and glycine-rich protein 1	285.09	11	52.3	3396700000	1701900000	574020000	304570000	51	47	12	6
P21333	FLNA	Filamin-A	323.31	4	36.5	51787000000	79719000000	21877000000	13335000000	941	1165	380	339
P21399	ACO1	Cytoplasmic aconitate hydratase	41.617	2	13	0	0	267600000	0	7	13	20	1
P21579	SYT1	Synaptotagmin-1	37.26	23	47.3	0	115120000	0	308240000	0	0	0	28
P21589	NT5E	5'-nucleotidase	36.736	10	33.4	0	433790000	0	0	0	23	0	0
P21796	VDAC1	Voltage-dependent anion-selective channel protein 1	323.31	3	30.1	4133200000	4191800000	5242700000	7078200000	91	105	81	126
P21912	SDHB	Succinate dehydrogenase [ubiquinone] iron-sulfur subunit, mitochondrial	31.059	14	63.7	358140000	372630000	623150000	539800000	14	21	35	26
P21926	CD9	CD9 antigen	134.3	40	77.2	0	529440000	0	0	13	26	0	0
P21953	BCKDHB	2-oxoisovalerate dehydrogenase subunit beta, mitochondrial	9.0372	62	71.6	0	0	0	153040000	0	0	0	17
P21964	COMT	Catechol O-methyltransferase	100.87	2	9.7	640370000	2068200000	891700000	852270000	19	45	16	20
P21980	TGM2	Protein-glutamine gamma-glutamyltransferase 2	178.15	9	65.9	1117800000	685660000	0	0	63	43	0	0
P22033	MUT	Methylmalonyl-CoA mutase, mitochondrial	34.896	10	29.2	0	0	465670000	445920000	0	0	14	29
P22059	OSBP	Oxysterol-binding protein 1	11.593	10	13.2	189510000	0	0	290170000	3	3	2	14
P22061	PCMT1	Protein-L-isoaspartate(D-aspartate) O-methyltransferase	150.73	7	75.6	793070000	966990000	976320000	2105700000	34	41	26	62
P22087	FBL	rRNA 2'-O-methyltransferase fibrillarin	132.17	1	2.4	2908000000	1882500000	4106900000	3038300000	68	54	84	68
P22102	GART	Trifunctional purine biosynthetic protein adenosine-3	323.31	26	66.7	2736800000	2260000000	4865300000	4125500000	101	88	144	117
P22223	CDH3	Cadherin-3	12.278	27	65.5	0	33365000	0	0	0	8	0	0
P22234	PAICS	Multifunctional protein ADE2	323.31	22	56.4	4105100000	3018900000	5542900000	3686700000	120	99	118	112
P22307	SCP2	Non-specific lipid-transfer protein	62.297	6	49.5	226430000	265700000	1099400000	728120000	12	14	33	41
P22314	UBA1	Ubiquitin-like modifier-activating enzyme 1	323.31	8	24.4	6346800000	8335400000	12006000000	6844500000	181	285	259	223
P22392	NME1-NME2	Nucleoside diphosphate kinase B	323.31	18	69.9	8502200000	7491300000	4879000000	4724600000	85	85	55	62
P22570	FDXR	NADPH:adrenodoxin oxidoreductase, mitochondrial	323.31	3	11.3	1024900000	328980000	10398000000	648480000	38	0	188	15
P22612	PRKACG	cAMP-dependent protein kinase catalytic subunit gamma	4.0217	2	33.3	0	0	0	105510000	0	2	0	5
P22626	HNRNPA2B1	Heterogeneous nuclear ribonucleoproteins A2/B1	323.31	12	50.3	17366000000	12742000000	42997000000	45031000000	265	216	523	596
P22676	CALB2	Calretinin	99.329	1	3	0	730930000	0	0	0	38	0	0
P22692	IGFBP4	Insulin-like growth factor-binding protein 4	23.144	24	60.6	0	0	210080000	0	5	0	6	0
P22694	PRKACB	cAMP-dependent protein kinase catalytic subunit beta	2.1663	3	16.5	0	0	0	62699000	0	0	4	6
P22695	UQCRC2	Cytochrome b-c1 complex subunit 2, mitochondrial	250.16	5	23.3	2328000000	1798100000	2256300000	4298300000	78	72	55	89
P22830	FECH	Ferrochelatase, mitochondrial	24.246	8	86.2	0	0	179370000	180130000	1	1	4	31
P23193	TCEA1	Transcription elongation factor A protein 1	73.1	16	52.9	461370000	0	502270000	322970000	33	6	26	26
P23246	SFPQ	Splicing factor, proline- and glutamine-rich	323.31	9	23	7293000000	6166400000	12389000000	15841000000	159	138	168	185
P23258	TUBG1	Tubulin gamma-1 chain	176.81	14	46.8	231090000	257130000	266110000	954470000	15	10	9	64
P23284	PPIB	Peptidyl-prolyl cis-trans isomerase B	295.85	1	3.5	5389700000	3233800000	9242600000	13213000000	67	65	73	118
P23368	ME2	NAD-dependent malic enzyme, mitochondrial	323.31	2	5.2	717310000	699020000	2082800000	3035400000	22	18	88	124
P23378	GLDC	Glycine dehydrogenase (decarboxylating), mitochondrial	79.309	73	33.4	0	0	309500000	0	0	0	28	0
P23381	WARS	Tryptophan--tRNA ligase, cytoplasmic	323.31	9	49.3	1658300000	4612900000	1531200000	3387400000	54	181	37	113
P23396	RPS3	40S ribosomal protein S3	244.48	1	0.9	11266000000	9124600000	8534900000	8042000000	196	188	147	139
P23434	GCSH	Glycine cleavage system H protein, mitochondrial	26.091	2	41.3	179720000	332740000	273970000	129290000	9	14	9	4
P23497	SP100	Nuclear autoantigen Sp-100	3.0408	6	8.5	0	160250000	0	0	0	9	0	1
P23511	NFYA	Nuclear transcription factor Y subunit alpha	6.2329	1	37.8	0	0	0	8553300	0	0	1	3
P23526	AHCY	Adenosylhomocysteinase	323.31	15	75.5	6130100000	5274000000	5720100000	3924000000	121	123	78	79
P23528	CFL1	Cofilin-1	323.31	1	2.2	27929000000	19497000000	27755000000	24274000000	207	169	185	168
P23588	EIF4B	Eukaryotic translation initiation factor 4B	323.31	3	4.9	1826000000	2208600000	1498500000	1251100000	54	92	36	40
P23634	ATP2B4	Plasma membrane calcium-transporting ATPase 4	1.9193	9	24.3	0	0	0	33558000	0	1	0	4
P23786	CPT2	Carnitine O-palmitoyltransferase 2, mitochondrial	29.039	2	26.2	0	0	0	443320000	0	0	7	35
P23919	DTYMK	Thymidylate kinase	15.664	3	27.7	520430000	341740000	452570000	299900000	43	34	19	15
P23921	RRM1	Ribonucleoside-diphosphate reductase large subunit	323.31	5	26.1	1533800000	0	1247400000	3312100000	60	4	34	145
P24386	CHM	Rab proteins geranylgeranyltransferase component A 1	1.7517	27	46.8	0	0	0	0	0	1	0	0
P24390	KDELR1	ER lumen protein-retaining receptor 1	14.183	4	9.4	66524000	0	0	0	4	0	1	4
P24534	EEF1B2	Elongation factor 1-beta	323.31	35	44.2	2894800000	3150000000	3209200000	3372000000	62	58	43	51
P24539	ATP5F1	ATP synthase F(0) complex subunit B1, mitochondrial	323.31	18	50.4	1037300000	898390000	1754900000	2477100000	50	38	49	65
P24593	IGFBP5	Insulin-like growth factor-binding protein 5	16.51	5	19.3	0	0	0	84536000	0	1	1	4
P24666	ACP1	Low molecular weight phosphotyrosine protein phosphatase	40.162	7	41.6	632030000	444630000	500640000	406460000	23	23	19	13
P24752	ACAT1	Acetyl-CoA acetyltransferase, mitochondrial	323.31	8	48.1	740280000	1081700000	2455200000	1454400000	24	32	77	53
P24821	TNC	Tenascin	323.31	3	10.3	0	4284600000	103500000	0	0	221	0	0
P24844	MYL9	Myosin regulatory light polypeptide 9	15.374	2	7.3	0	238980000	0	0	0	20	0	0
P24928	POLR2A	DNA-directed RNA polymerase II subunit RPB1	29.558	2	20.2	70214000	0	67084000	187430000	3	1	6	23
P24941	CDK2	Cyclin-dependent kinase 2	16.515	4	41.1	0	87120000	78637000	122410000	2	7	4	9
P25098	ADRBK1	Beta-adrenergic receptor kinase 1	1.7843	18	62.5	0	0	0	9263200	0	1	0	3
P25205	MCM3	DNA replication licensing factor MCM3	323.31	5	29.2	1943100000	1834000000	2744900000	3190300000	86	57	90	129
P25208	NFYB	Nuclear transcription factor Y subunit beta	3.3155	11	12.2	0	0	0	16416000	0	0	2	4
P25325	MPST	3-mercaptopyruvate sulfurtransferase	18.215	18	25.8	183480000	0	0	0	15	14	1	0
P25398	RPS12	Ribosomal protein S12	323.31	4	31.4	6573000000	5970200000	5465700000	4145700000	66	68	55	41
P25440	BRD2	Bromodomain-containing protein 2	13.072	1	3.7	0	0	150250000	130290000	0	0	8	7
P25490	YY1	Transcriptional repressor protein YY1	7.0075	4	35.3	103680000	111330000	330210000	104730000	1	5	10	3
P25685	DNAJB1	DnaJ homolog subfamily B member 1	69.358	27	53.7	781390000	991980000	897840000	572630000	46	51	28	25
P25705	ATP5A1	ATP synthase subunit alpha, mitochondrial	323.31	12	80.7	9450600000	9907200000	27290000000	29467000000	199	207	257	287
P25786	PSMA1	Proteasome subunit alpha type-1	149.06	17	47.4	2494700000	2231000000	1828600000	1442600000	98	79	40	45
P25787	PSMA2	Proteasome subunit alpha type-2	111.69	30	58.6	1665000000	1438200000	565980000	768620000	60	52	23	31
P25788	PSMA3	Proteasome subunit alpha type-3	78.371	18	45.4	897980000	750950000	603170000	512360000	27	36	15	14
P25789	PSMA4	Proteasome subunit alpha type-4	267.96	6	28.4	2510300000	2120500000	1434400000	1270600000	106	78	49	57
P26006	ITGA3	Integrin alpha-3	59.939	18	59	479010000	185380000	0	89660000	33	19	0	1
P26038	MSN	Moesin	323.31	30	73.7	9760300000	15591000000	10197000000	3330200000	243	299	142	38
P26196	DDX6	Probable ATP-dependent RNA helicase DDX6	224.58	12	39.3	1035700000	751450000	963790000	1684900000	44	35	19	74
P26232	CTNNA2	Catenin alpha-2	24.009	6	25.8	0	0	0	190470000	1	3	0	23
P26358	DNMT1	DNA (cytosine-5)-methyltransferase 1	135.97	7	30	0	314190000	1614200000	1368700000	5	16	36	101
P26367	PAX6	Paired box protein Pax-6	1.9525	8	14.5	0	0	0	0	0	0	1	0
P26368	U2AF2	Splicing factor U2AF 65 kDa subunit	238.23	7	65.6	1718800000	2022500000	3017200000	2882700000	63	83	59	78
P26373	RPL13	Ribosomal protein L13	260.77	18	54.8	4141400000	3673400000	4466500000	2893800000	70	68	37	63
P26378	ELAVL4	ELAV-like protein 4	115.77	57	60.5	0	0	0	346060000	0	0	4	8
P26440	IVD	Isovaleryl-CoA dehydrogenase, mitochondrial	86.913	18	11.9	0	288900000	63212000	546210000	0	17	3	32
P26447	S100A4	S100 calcium binding protein A4	9.8147	5	21.3	2326700000	0	0	0	22	0	0	0
P26583	HMGB2	High mobility group protein B2	323.31	12	53.8	1400000000	1589500000	7869800000	6334300000	27	47	75	76
P26599	PTBP1	Polypyrimidine tract-binding protein 1	323.31	21	82.7	6844900000	7013300000	9449600000	12551000000	119	130	149	185
P26639	TARS	Threonine--tRNA ligase, cytoplasmic	274.14	13	59.4	3417400000	2832300000	3475400000	2777800000	154	140	103	134
P26640	VARS	Valine--tRNA ligase	323.31	14	21.8	1312300000	2295100000	1762200000	2895200000	37	145	90	171
P26641	EEF1G	Elongation factor 1-gamma	323.31	5	49.1	11717000000	9807200000	6136400000	13222000000	190	174	93	168
P26885	FKBP2	Peptidyl-prolyl cis-trans isomerase FKBP2	32.773	10	20.9	349230000	0	689610000	531050000	2	0	19	15
P27105	STOM	Erythrocyte band 7 integral membrane protein	21.11	5	8.2	0	92998000	0	0	2	16	0	0
P27144	AK4	Adenylate kinase 4, mitochondrial	65.628	2	10.4	0	472110000	739910000	0	0	27	17	0
P27348	YWHAQ	14-3-3 protein theta	323.31	10	9.8	7831300000	6701500000	5050700000	3632500000	114	119	73	62
P27361	MAPK3	Mitogen-activated protein kinase 3	4.5489	34	37	0	0	0	0	0	3	1	0
P27449	ATP6V0C	V-type proton ATPase 16 kDa proteolipid subunit	8.8225	28	41.9	0	0	0	399070000	6	3	0	13
P27482	CALML3	Calmodulin-like protein 3	2.6359	5	33.1	0	0	0	0	0	1	0	0
P27635	RPL10	60S ribosomal protein L10	323.31	7	54.8	5854300000	5483700000	5912200000	4951600000	109	74	79	63
P27694	RPA1	Replication protein A 70 kDa DNA-binding subunit	223.59	7	36.9	338230000	314240000	1436900000	629420000	19	13	54	34
P27695	APEX1	DNA-(apurinic or apyrimidinic site) lyase	323.31	10	22.7	1911100000	1936500000	2335700000	2374600000	70	60	69	81
P27708	CAD	CAD protein	307.53	14	63.9	1717400000	1123500000	1678400000	748340000	135	63	111	37
P27797	CALR	Calreticulin	323.31	2	7.7	8666400000	11748000000	20833000000	32081000000	132	202	193	293
P27816	MAP4	Microtubule-associated protein 4	323.31	5	16.4	2305500000	4012400000	1831200000	755240000	71	155	56	13
P27824	CANX	Calnexin	323.31	15	27.6	4698800000	3040300000	5412700000	20796000000	96	80	98	262
P27986	PIK3R1	Phosphatidylinositol 3-kinase regulatory subunit alpha	16.951	16	46.8	0	0	0	48925000	0	0	1	16
P28062	PSMB8	Proteasome subunit beta type-8	15.906	13	31.8	0	187040000	0	0	0	18	0	0
P28065	PSMB9	Proteasome subunit beta type-9	5.2222	8	55.8	0	128040000	0	0	0	7	0	0
P28066	PSMA5	Proteasome subunit alpha type-5	153.93	3	35.5	1696700000	1612300000	1528700000	963460000	38	42	27	38
P28070	PSMB4	Proteasome subunit beta type-4	126.09	1	11.9	886690000	808200000	561240000	535780000	41	35	29	19
P28072	PSMB6	Proteasome subunit beta type-6	156.73	5	28.4	1606500000	1057000000	1022300000	796120000	43	39	19	35
P28074	PSMB5	Proteasome subunit beta type-5	143.64	3	41.4	1241500000	999700000	1089700000	856870000	46	35	27	34
P28288	ABCD3	ATP-binding cassette sub-family D member 3	25.451	5	42.8	193230000	0	279660000	202760000	10	3	26	16
P28300	LOX	Protein-lysine 6-oxidase	8.0668	14	58.5	0	0	0	65240000	0	0	0	3
P28331	NDUFS1	NADH-ubiquinone oxidoreductase 75 kDa subunit, mitochondrial	172.52	6	35	650280000	540360000	1660000000	959640000	27	23	96	70
P28340	POLD1	DNA polymerase delta catalytic subunit	73.589	10	62.7	205770000	0	209940000	135160000	11	0	13	0
P28347	TEAD1	Transcriptional enhancer factor TEF-1	1.8257	44	70.6	0	0	52598000	64366000	2	0	0	4
P28370	SMARCA1	Probable global transcription activator SNF2L1	13.116	6	17.1	0	0	0	261280000	2	0	0	13
P28482	MAPK1	Mitogen-activated protein kinase 1	170.89	18	45.2	454600000	577770000	470750000	518680000	9	40	21	36
P28676	GCA	Grancalcin	17.533	7	24.1	0	0	342850000	0	0	5	14	1
P28799	GRN	Granulins	126.13	4	5.8	237170000	494090000	427680000	454260000	1	21	5	21
P28838	LAP3	Cytosol aminopeptidase	39.509	4	23.5	187390000	278460000	170070000	118950000	16	24	23	7
P29034	S100A2	Protein S100-A2	12.273	12	16.5	0	79280000	404270000	0	0	0	14	0
P29083	GTF2E1	General transcription factor IIE subunit 1	5.541	12	66.2	0	0	15514000	0	0	0	2	0
P29120	PCSK1	Neuroendocrine convertase 1	17.286	22	64.2	0	0	105360000	105190000	0	0	4	20
P29144	TPP2	Tripeptidyl-peptidase 2	131.97	9	29.3	75453000	76437000	143860000	1742500000	1	4	5	88
P29218	IMPA1	Inositol monophosphatase 1	30.736	10	64.8	0	0	221910000	125980000	6	17	15	8
P29317	EPHA2	Ephrin type-A receptor 2	23.826	126	67.1	78161000	0	0	0	13	6	0	1
P29320	EPHA3	Ephrin type-A receptor 3	42.897	11	20.6	0	0	418210000	0	0	1	31	0
P29353	SHC1	SHC-transforming protein 1	3.3658	10	29.9	0	0	0	0	2	1	0	0
P29373	CRABP2	Cellular retinoic acid-binding protein 2	161.67	7	19.3	0	739780000	0	0	0	27	0	0
P29401	TKT	Transketolase	323.31	15	77.4	42810000000	17504000000	6622200000	5721300000	503	285	99	119
P29692	EEF1D	Elongation factor 1-delta	323.31	10	45.4	3240800000	3297300000	841970000	1680300000	68	57	23	23
P29762	CRABP1	Cellular retinoic acid-binding protein 1	43.43	3	20.6	0	0	1184700000	0	0	0	34	0
P29966	MARCKS	Myristoylated alanine-rich C-kinase substrate	172.25	4	15.8	399570000	776370000	1410500000	1175400000	17	24	35	35
P29992	GNA11	Guanine nucleotide-binding protein subunit alpha-11	106.29	10	56.1	0	350920000	379530000	902590000	2	14	17	56
P30040	ERP29	Endoplasmic reticulum resident protein 29	84.45	20	39	744410000	777560000	2653000000	1862000000	35	29	56	89
P30041	PRDX6	Peroxiredoxin-6	323.31	14	30.7	5264000000	5559800000	6471500000	1841500000	138	138	112	54
P30042	C21orf33	ES1 protein homolog, mitochondrial	134.15	8	12.5	0	279330000	464670000	1120200000	0	7	23	44
P30043	BLVRB	Flavin reductase (NADPH)	279.72	14	70.9	1959000000	990630000	798500000	0	90	29	14	0
P30044	PRDX5	Peroxiredoxin-5, mitochondrial	323.31	17	61.1	2049200000	1381100000	3889800000	2683800000	73	65	84	82
P30046	DDT	D-dopachrome decarboxylase	91.482	35	53.4	1035000000	1815100000	1650200000	1127600000	38	47	36	41
P30047	GCHFR	GTP cyclohydrolase 1 feedback regulatory protein	4.2523	4	7	0	0	0	109690000	0	0	0	7
P30048	PRDX3	Thioredoxin-dependent peroxide reductase, mitochondrial	161.49	25	69.4	1908300000	1610000000	2519100000	2771900000	56	41	29	28
P30049	ATP5D	ATP synthase subunit delta, mitochondrial	116.71	12	23	536890000	728340000	1309800000	1418100000	10	8	17	29
P30050	RPL12	60S ribosomal protein L12	323.31	46	62.5	3903300000	3503200000	3482400000	2731100000	59	62	40	33
P30084	ECHS1	Enoyl-CoA hydratase, mitochondrial	215.44	2	79.6	1583600000	1933500000	1706100000	1060400000	69	71	45	57
P30085	CMPK1	UMP-CMP kinase	89.343	28	69.5	377210000	459440000	418530000	285480000	22	43	33	22
P30086	PEBP1	Phosphatidylethanolamine-binding protein 1	323.31	1	12.3	3295100000	1842600000	2000100000	2998100000	83	49	44	66
P30101	PDIA3	Protein disulfide-isomerase A3	323.31	26	69.1	6871400000	7384300000	29160000000	49200000000	147	186	272	377
P30153	PPP2R1A	Serine/threonine-protein phosphatase 2A 65 kDa regulatory subunit A alpha isoform	323.31	9	39.5	4735100000	6968300000	5821700000	6323100000	133	190	121	132
P30154	PPP2R1B	Serine/threonine-protein phosphatase 2A 65 kDa regulatory subunit A beta isoform	14.72	3	17.8	0	0	104750000	114530000	0	0	4	14
P30260	CDC27	Cell division cycle protein 27 homolog	3.5642	1	26.5	0	0	0	71979000	0	0	0	3
P30405	PPIF	Peptidyl-prolyl cis-trans isomerase F, mitochondrial	39.635	17	52.1	0	261470000	207610000	265030000	0	6	1	3
P30408	TM4SF1	Transmembrane 4 L six family member 1	2.2115	13	43.5	69652000	0	0	0	2	1	0	0
P30419	NMT1	Glycylpeptide N-tetradecanoyltransferase 1	79.76	11	43.9	476400000	585180000	339600000	374140000	35	37	9	16
P30455	HLA-A	HLA class I histocompatibility antigen, A-3 alpha chain	182.36	34	54.9	285920000	1442000000	0	380940000	13	72	2	8
P30479	HLA-B	HLA class I histocompatibility antigen, B-7 alpha chain	125.36	18	73.4	0	1073700000	0	0	2	52	0	3
P30490	HLA-B	HLA class I histocompatibility antigen, B-7 alpha chain	4.6866	16	62	0	69366000	0	0	0	4	0	0
P30519	HMOX2	Heme oxygenase 2	209.2	26	67	208210000	780050000	199990000	720000000	4	54	5	45
P30520	ADSS	Adenylosuccinate synthetase isozyme 2	50.1	9	16.9	349470000	324420000	295820000	114930000	37	28	17	5
P30533	LRPAP1	Alpha-2-macroglobulin receptor-associated protein	4.8212	27	71.5	0	0	86441000	0	1	0	4	2
P30536	TSPO	Translocator protein	37.499	25	84	0	0	98982000	0	5	8	6	0
P30566	ADSL	Adenylosuccinate lyase	58.173	2	17.3	433010000	481610000	392250000	458820000	28	35	21	41
P30622	CLIP1	CAP-Gly domain-containing linker protein 1	6.7929	3	9.3	79577000	0	0	0	6	3	1	1
P30626	SRI	Sorcin	49.882	1	5.5	347670000	801980000	394630000	381470000	15	42	9	15
P30740	SERPINB1	Leukocyte elastase inhibitor	32.233	22	50	468100000	622100000	0	0	26	58	0	0
P30793	GCH1	GTP cyclohydrolase 1	8.5335	14	78.9	0	0	0	54768000	0	0	0	6
P30825	SLC7A1	High affinity cationic amino acid transporter 1	12.77	22	45	0	0	0	126910000	0	1	0	12
P30837	ALDH1B1	Aldehyde dehydrogenase X, mitochondrial	142.89	2	11.9	461780000	794810000	787670000	558850000	22	53	36	31
P30838	ALDH3A1	Aldehyde dehydrogenase, dimeric NADP-preferring	323.31	13	25.8	13439000000	0	0	0	182	0	0	0
P30876	POLR2B	DNA-directed RNA polymerase II subunit RPB2	37.289	10	48.1	174330000	0	239390000	146730000	6	5	12	9
P30990	NTS	Neurotensin/neuromedin N	293.78	33	62	0	0	411670000	1192600000	0	0	7	36
P31040	SDHA	Succinate dehydrogenase [ubiquinone] flavoprotein subunit, mitochondrial	323.31	1	2.9	1826700000	2533500000	6112400000	2988100000	49	118	138	115
P31146	CORO1A	Coronin-1A	75.54	2	17	0	0	228670000	369430000	0	1	19	32
P31150	GDI1	Rab GDP dissociation inhibitor alpha	323.31	10	65.3	378590000	798930000	1537200000	2096400000	16	52	56	90
P31153	MAT2A	S-adenosylmethionine synthase isoform type-2	30.138	12	46.1	1146300000	834720000	845030000	658100000	55	33	22	26
P31323	PRKAR2B	cAMP-dependent protein kinase type II-beta regulatory subunit	4.3987	2	6.6	0	0	0	0	0	0	2	0
P31327	CPS1	Carbamoyl-phosphate synthase [ammonia], mitochondrial	9.1439	8	62.7	48283000	0	0	0	10	0	1	1
P31350	RRM2	Ribonucleoside-diphosphate reductase subunit M2	91.488	18	48.5	134710000	504840000	130440000	54145000	26	45	5	2
P31431	SDC4	Syndecan-4	2.3399	48	30.1	0	0	0	0	0	1	0	0
P31483	TIA1	Nucleolysin TIA-1 isoform p40	40.8	3	50	0	0	211970000	120670000	1	0	19	8
P31689	DNAJA1	DnaJ homolog subfamily A member 1	262.1	14	12	1942900000	1364300000	1820900000	1921400000	73	66	56	71
P31749	AKT1	RAC-alpha serine/threonine-protein kinase	3.6824	5	44.6	0	0	36990000	0	0	3	4	2
P31751	AKT2	RAC-beta serine/threonine-protein kinase	7.9896	2	2.3	52107000	0	0	0	3	1	1	0
P31930	UQCRC1	Cytochrome b-c1 complex subunit 1, mitochondrial	323.31	39	56.9	2193400000	1904400000	2083300000	4148300000	74	80	60	127
P31937	HIBADH	3-hydroxyisobutyrate dehydrogenase, mitochondrial	120.49	2	16.4	205820000	434660000	329490000	410990000	6	25	18	20
P31939	ATIC	Bifunctional purine biosynthesis protein PURH	323.31	7	39.7	5160400000	3464000000	4338000000	1475100000	174	151	129	73
P31942	HNRNPH3	Heterogeneous nuclear ribonucleoprotein H3	323.31	9	75	1611300000	1313100000	3091600000	3984300000	48	37	57	78
P31943	HNRNPH1	Heterogeneous nuclear ribonucleoprotein H	323.31	6	15.7	5840700000	3516100000	12341000000	13155000000	73	67	233	287
P31946	YWHAB	14-3-3 protein beta/alpha	323.31	2	9.2	2994800000	4245400000	3443100000	1714700000	63	83	61	43
P31947	SFN	14-3-3 protein sigma	323.31	11	36.8	5750400000	9343000000	0	3041100000	87	122	1	52
P31948	STIP1	Stress-induced-phosphoprotein 1	323.31	33	65.6	7955200000	3926100000	6069700000	6611900000	199	91	127	167
P31949	S100A11	Protein S100-A11	323.31	15	64.6	3519600000	7256500000	0	1435500000	33	64	0	17
P32004	L1CAM	Neural cell adhesion molecule L1	1.7255	8	48.3	0	0	21099000	0	0	0	2	0
P32119	PRDX2	Peroxiredoxin-2	323.31	10	39.6	0	2864600000	9196900000	12992000000	1	53	94	106
P32320	CDA	Cytidine deaminase	113.35	14	72.8	0	131040000	0	0	0	8	0	0
P32321	DCTD	Deoxycytidylate deaminase	2.4691	13	16.4	0	0	0	0	4	2	0	0
P32322	PYCR1	Pyrroline-5-carboxylate reductase 1, mitochondrial	152.75	34	67.9	356330000	486560000	1229700000	2147700000	18	18	37	74
P32455	GBP1	Guanylate-binding protein 1	4.7574	16	43.9	0	38855000	0	0	0	2	1	0
P32856	STX2	Syntaxin-2	24.086	7	23.7	0	0	0	47971000	0	0	0	6
P32969	RPL9	L ribosomal proteins	323.31	33	28.1	2867700000	2532300000	3066600000	2071500000	67	64	93	84
P33176	KIF5B	Kinesin-1 heavy chain	323.31	1	4	1269200000	682530000	1491600000	1346200000	80	42	100	89
P33240	CSTF2	Cleavage stimulation factor subunit 2	175.49	19	52.6	344920000	349730000	333490000	270310000	15	13	27	24
P33316	DUT	Deoxyuridine 5'-triphosphate nucleotidohydrolase, mitochondrial	66.283	12	51.2	1202200000	1148400000	1351800000	2503100000	48	38	35	51
P33527	ABCC1	Multidrug resistance-associated protein 1	33.54	2	43.9	410150000	0	0	0	27	3	0	0
P33552	CKS2	Cyclin-dependent kinases regulatory subunit 2	4.014	9	30.7	0	45041000	0	0	0	2	0	1
P33764	S100A3	Protein S100-A3	15.487	5	36.6	0	0	0	11404000	1	1	0	1
P33908	MAN1A1	Mannosyl-oligosaccharide 1,2-alpha-mannosidase IA	6.5991	15	66	0	0	0	275570000	0	0	0	3
P33947	KDELR2	ER lumen protein-retaining receptor 2	7.1207	19	61.4	0	49785000	0	0	1	4	0	1
P33991	MCM4	DNA replication licensing factor MCM4	323.31	37	61.3	2401900000	1901100000	3319700000	3226900000	79	81	133	158
P33992	MCM5	DNA replication licensing factor MCM5	193.75	42	55.4	1501800000	1531500000	2054600000	2443600000	58	52	81	100
P33993	MCM7	DNA replication licensing factor MCM7	314.18	26	72.8	2196600000	1780500000	2873500000	2694400000	100	89	113	121
P34741	SDC2	Syndecan-2	17.488	5	39.4	0	0	0	0	0	0	0	1
P34896	SHMT1	Serine hydroxymethyltransferase, cytosolic	21.494	5	32.6	0	0	70378000	65979000	4	7	4	11
P34897	SHMT2	Serine hydroxymethyltransferase, mitochondrial	323.31	9	56.5	2744800000	6113200000	4681100000	13380000000	77	153	89	188
P34913	EPHX2	Bifunctional epoxide hydrolase 2	4.9435	14	56.7	0	0	0	9396200	0	0	0	2
P34932	HSPA4	Heat shock protein family A member 4	323.31	3	31.7	5325200000	4840500000	5532400000	3999100000	194	185	147	156
P34949	MPI	Mannose-6-phosphate isomerase	4.5159	1	11.6	0	0	0	33562000	1	0	0	2
P35052	GPC1	Glypican-1	8.8955	1	23.5	81115000	0	0	0	7	4	0	0
P35080	PFN2	Profilin-2	126.4	12	47.2	349290000	282370000	743660000	683000000	12	8	30	14
P35219	CA8	Carbonic anhydrase-related protein	29.139	20	43.7	0	0	0	127390000	0	0	0	11
P35221	CTNNA1	Catenin alpha-1	323.31	15	56.9	1646100000	2882500000	1641000000	1616500000	58	165	62	70
P35222	CTNNB1	Catenin beta-1	296.7	52	36.4	531310000	1766800000	813580000	1315300000	11	101	26	74
P35232	PHB	Prohibitin	323.31	23	72.9	4608500000	3192600000	10510000000	5815900000	113	95	118	117
P35237	SERPINB6	Serpin B6	36.385	38	49.8	418440000	329810000	0	0	29	35	0	0
P35241	RDX	Radixin	127.29	31	53.4	1165800000	625080000	1239400000	1767700000	58	19	60	97
P35244	RPA3	Replication protein A 14 kDa subunit	57.887	4	7.5	301320000	416220000	926640000	608010000	18	14	21	20
P35249	RFC4	Replication factor C subunit 4	80.422	6	31.9	0	302360000	586820000	552640000	6	21	18	44
P35250	RFC2	Replication factor C subunit 2	66.27	3	15.5	0	119040000	906500000	981060000	3	10	23	49
P35251	RFC1	Replication factor C subunit 1	17.547	8	46.5	0	0	284110000	33924000	0	0	14	4
P35268	RPL22	Ribosomal protein L22	310.7	7	45.5	3202500000	2699300000	2956800000	2052700000	43	42	36	26
P35269	GTF2F1	General transcription factor IIF subunit 1	37.628	6	43.1	0	0	59196000	0	2	3	5	0
P35270	SPR	Sepiapterin reductase	83.741	13	56.7	487870000	265660000	223140000	0	35	18	13	1
P35573	AGL	Glycogen debranching enzyme	1.8911	9	21.4	0	0	8072300	0	0	1	1	0
P35579	MYH9	Myosin-9	323.31	2	13.4	35663000000	89510000000	16003000000	19765000000	760	1290	287	416
P35580	MYH10	Myosin-10	323.31	25	53.8	608090000	656570000	4630900000	1361700000	27	17	208	86
P35606	COPB2	Coatomer subunit beta	179.82	12	20.3	1009200000	1178600000	1053400000	1038700000	67	95	49	70
P35610	SOAT1	Sterol O-acyltransferase 1	7.3432	3	12	0	0	101900000	0	1	5	8	0
P35611	ADD1	Alpha-adducin	32.53	6	16.4	153920000	0	144010000	161640000	2	0	8	26
P35613	BSG	Basigin	105.05	14	81.9	529620000	1082400000	774870000	1215700000	21	34	18	42
P35637	FUS	RNA-binding protein FUS	323.31	5	28.6	2329800000	2205100000	4492200000	4685100000	47	69	63	95
P35658	NUP214	Nuclear pore complex protein Nup214	36.146	6	21.4	0	0	0	226880000	4	0	4	22
P35659	DEK	Protein DEK	141.85	12	32.4	735170000	602000000	1999000000	2318600000	22	20	41	62
P35754	GLRX	Glutaredoxin-1	5.268	4	27.6	0	0	96988000	104500000	7	0	2	7
P35813	PPM1A	Protein phosphatase 1A	8.8062	2	6.4	0	0	82713000	91058000	1	0	4	7
P35914	HMGCL	Hydroxymethylglutaryl-CoA lyase, mitochondrial	4.74	6	13	0	0	0	29131000	0	1	1	3
P35998	PSMC2	26S proteasome regulatory subunit 7	323.31	28	30.5	1926700000	3046700000	2068100000	1499500000	92	143	62	70
P36404	ARL2	ADP-ribosylation factor-like protein 2	16.82	8	34.3	0	0	90444000	96071000	7	2	9	7
P36405	ARL3	ADP-ribosylation factor-like protein 3	52.047	7	13.2	217820000	0	274740000	191120000	15	3	20	16
P36406	TRIM23	E3 ubiquitin-protein ligase TRIM23	4.2056	7	17.4	0	0	0	23494000	2	4	1	5
P36507	MAP2K2	Dual specificity mitogen-activated protein kinase kinase 2	58.081	2	4.3	190540000	268150000	242340000	195890000	4	17	11	15
P36542	ATP5C1	ATP synthase subunit gamma, mitochondrial	156.53	7	47.8	1140100000	1165600000	2783700000	3031600000	40	46	60	57
P36543	ATP6V1E1	V-type proton ATPase subunit E 1	19.985	43	87.2	157260000	0	216480000	133570000	0	5	4	11
P36551	CPOX	Oxygen-dependent coproporphyrinogen-III oxidase, mitochondrial	29.055	9	46.3	0	201200000	173200000	0	6	30	4	0
P36578	RPL4	L ribosomal proteins	323.31	9	59.1	9766100000	7592200000	7488900000	7677700000	180	151	88	124
P36639	NUDT1	7,8-dihydro-8-oxoguanine triphosphatase	12.404	7	28.9	94365000	0	0	0	6	5	7	3
P36776	LONP1	Lon protease homolog, mitochondrial	323.31	9	55.4	616780000	1102200000	5149100000	3167500000	17	29	168	155
P36871	PGM1	Phosphoglucomutase-1	190.85	12	47.5	505500000	601710000	1503200000	214450000	36	40	73	4
P36873	PPP1CC	Serine/threonine-protein phosphatase PP1-gamma catalytic subunit	90.052	19	79	208990000	0	530960000	429900000	11	8	18	11
P36915	GNL1	Guanine nucleotide-binding protein-like 1	29.114	9	55.6	0	0	568690000	419640000	1	5	35	22
P36952	SERPINB5	Serpin B5	27.058	12	70.9	0	131980000	0	0	0	15	0	0
P36954	POLR2I	DNA-directed RNA polymerase II subunit RPB9	14.88	13	56.1	0	0	119510000	0	8	0	4	4
P36957	DLST	Dihydrolipoamide S-succinyltransferase (E2 component of 2-oxo-glutarate complex)	220.21	8	63.6	677930000	933170000	2531000000	2091400000	24	34	48	65
P36969	GPX4	Phospholipid hydroperoxide glutathione peroxidase, mitochondrial	5.8874	2	51.2	0	0	292280000	0	0	3	18	2
P37108	SRP14	Signal recognition particle 14 kDa protein	284.07	7	44.1	968720000	645220000	1816100000	2594400000	20	16	27	27
P37198	NUP62	Nuclear pore glycoprotein p62	45.924	3	37.5	208300000	132030000	233810000	240250000	6	7	21	27
P37235	HPCAL1	Hippocalcin-like protein 1	12.987	10	64.2	0	107610000	83436000	101510000	9	15	4	13
P37268	FDFT1	Squalene synthase	62.165	14	50	0	147820000	0	884420000	1	5	1	44
P37802	TAGLN2	Transgelin-2	323.31	8	55.6	11106000000	23431000000	7406000000	6833800000	159	232	118	125
P37837	TALDO1	Transaldolase	116.62	12	82.4	4402400000	1889800000	1513100000	3270400000	104	63	45	62
P37840	SNCA	Alpha-synuclein	62.941	41	72.7	0	0	677040000	599060000	0	0	21	22
P38117	ETFB	Electron transfer flavoprotein subunit beta	102.75	24	61.8	1448400000	1016000000	682940000	0	60	47	25	0
P38159	RBMX	RNA-binding motif protein, X chromosome	163.72	7	32.3	3280400000	2589400000	5312600000	6943000000	75	61	66	85
P38606	ATP6V1A	V-type proton ATPase catalytic subunit A	283.16	4	12	569180000	878430000	1787700000	1321700000	28	43	89	78
P38646	HSPA9	Stress-70 protein, mitochondrial	323.31	4	30.4	8387300000	8296200000	11311000000	20230000000	178	210	167	275
P38919	EIF4A3	Eukaryotic initiation factor 4A-III	204.17	1	4.5	2067500000	1857800000	3623200000	2819900000	78	76	85	100
P39019	RPS19	40S ribosomal protein S19	135.56	11	34.3	5061400000	4497400000	3513600000	2520100000	71	70	48	51
P39023	RPL3	60S ribosomal protein L3	323.31	3	50.1	9102700000	8470500000	8153500000	7199600000	159	184	167	147
P39060	COL18A1	Collagen alpha-1(XVIII) chain	1.8789	0	44.5	0	0	0	0	2	0	0	0
P39210	MPV17	Protein Mpv17	3.791	0	27.6	0	0	0	0	1	0	0	0
P39656	DDOST	Dolichyl-diphosphooligosaccharide--protein glycosyltransferase 48 kDa subunit	229.99	14	61.1	1244700000	1177800000	2267900000	1924200000	56	46	52	74
P39687	ANP32A	Acidic leucine-rich nuclear phosphoprotein 32 family member A	323.31	11	30.7	1705400000	1234500000	2518900000	1328500000	58	44	38	28
P39748	FEN1	Flap endonuclease 1	323.31	5	18.5	1015300000	656450000	2750700000	3319200000	40	35	53	80
P40121	CAPG	Macrophage-capping protein	220.13	1	13.6	0	1940900000	0	0	3	63	0	4
P40123	CAP2	Adenylyl cyclase-associated protein 2	8.5905	13	44.2	0	0	104170000	0	0	0	9	0
P40222	TXLNA	Alpha-taxilin	12.073	6	5.3	0	0	106610000	0	0	0	10	5
P40227	CCT6A	T-complex protein 1 subunit zeta	323.31	10	61.1	6754200000	6425200000	3655500000	4729800000	159	159	92	108
P40261	NNMT	Nicotinamide N-methyltransferase	26.744	13	40.6	854310000	0	0	0	37	0	0	0
P40306	PSMB10	Proteasome subunit beta type-10	48.847	3	17.6	0	80264000	0	0	0	5	0	0
P40424	PBX1	Pre-B-cell leukemia transcription factor 1	3.2937	3	6.4	0	0	126960000	0	0	0	2	1
P40429	RPL13A	60S ribosomal protein L13a	36.884	17	47.8	2000500000	1777500000	2029000000	1514800000	52	61	28	33
P40616	ARL1	ADP-ribosylation factor-like protein 1	26.081	25	54.7	196210000	140890000	123130000	123060000	17	12	8	16
P40763	STAT3	Signal transducer and activator of transcription 3	164.77	9	10.9	416310000	329320000	232040000	473390000	39	21	3	58
P40925	MDH1	Malate dehydrogenase, cytoplasmic	196.62	6	44.1	2517600000	1918200000	3370200000	1724000000	46	45	52	32
P40926	MDH2	Malate dehydrogenase, mitochondrial	323.31	27	60.5	9010900000	16257000000	17269000000	25349000000	146	213	142	152
P40937	RFC5	Replication factor C subunit 5	65.086	11	39.5	195760000	275670000	323410000	989120000	4	14	22	53
P40938	RFC3	Replication factor C subunit 3	71.812	18	63.5	0	221340000	682830000	602420000	2	1	16	11
P40939	HADHA	Trifunctional enzyme subunit alpha, mitochondrial	323.31	12	34.2	2955600000	2705800000	4744400000	2166200000	122	134	130	103
P41091	EIF2S3	Eukaryotic translation initiation factor 2 subunit 3	295.58	2	17.7	3252700000	3182300000	2548900000	2746700000	103	114	63	88
P41208	CETN2	Centrin-2	174.15	6	5.3	0	212220000	0	0	2	20	2	1
P41214	EIF2D	Eukaryotic translation initiation factor 2D	2.9933	16	52.4	0	0	0	30420000	0	1	3	1
P41223	BUD31	Protein BUD31 homolog	21.715	1	6.1	190990000	312210000	167120000	205800000	13	15	13	22
P41227	NAA10	N-alpha-acetyltransferase 10	16.36	5	24.9	331610000	377080000	427290000	233620000	6	12	19	4
Q6NXS1	PPP1R2B	Protein phosphatase inhibitor 2 family member B	5.134	18	60.2	0	0	0	0	0	1	0	0
P41240	CSK	Tyrosine-protein kinase CSK	2.4775	1	10.2	0	0	21734000	0	1	0	2	0
P41250	GARS	Glycine--tRNA ligase	323.31	3	16.8	2586000000	3649900000	2142900000	3982300000	100	170	48	137
P41252	IARS	Isoleucine--tRNA ligase, cytoplasmic	323.31	21	57.3	2129000000	2135600000	1007300000	2868400000	134	142	19	178
P41567	EIF1	Eukaryotic translation initiation factor 1	96.549	8	30.4	393330000	389820000	225080000	174390000	18	29	10	13
P41743	PRKCI	Protein kinase C iota type	9.1959	39	83.1	0	0	0	60994000	1	0	2	9
P42025	ACTR1B	Beta-centractin	6.3036	10	50.9	0	0	53416000	0	7	8	5	9
P42126	ECI1	Enoyl-CoA delta isomerase 1, mitochondrial	49.305	10	51.9	303690000	368270000	700330000	1149900000	6	28	23	42
P42166	TMPO	Lamina-associated polypeptide 2, isoform alpha	323.31	13	69.9	1483500000	643090000	2936300000	3870800000	65	18	78	124
P42167	TMPO	Lamina-associated polypeptide 2, isoform alpha	138.33	17	82.3	706640000	521110000	1005500000	2736300000	20	14	19	58
P42224	STAT1	Signal transducer and activator of transcription 1-alpha/beta	115.74	43	60.6	1108700000	699070000	590670000	0	93	34	13	0
P42285	SKIV2L2	Superkiller viralicidic activity 2-like 2	57.57	8	86.7	340280000	178160000	282420000	276810000	29	14	36	37
P42330	AKR1C3	Aldo-keto reductase family 1 member C3	321.23	1	1.2	14633000000	0	0	150330000	138	0	0	0
P42345	MTOR	Serine/threonine-protein kinase mTOR	11.268	16	74.7	0	0	0	0	0	0	0	1
P42574	CASP3	Caspase-3	5.8456	4	47.3	0	0	70996000	0	5	6	8	2
P42575	CASP2	Caspase-2	5.7382	2	14.6	0	0	0	0	0	2	0	0
P42677	RPS27	40S ribosomal protein S27	49.721	15	58.6	1291100000	1435500000	1069100000	797770000	41	26	18	15
P42685	FRK	Tyrosine-protein kinase FRK	1.7962	2	4.1	0	0	0	0	0	0	0	1
P42695	NCAPD3	Condensin-2 complex subunit D3	38.425	1	10.8	0	0	0	95209000	0	0	0	18
P42696	RBM34	RNA-binding protein 34	2.5734	10	58.3	0	0	0	0	1	0	0	0
P42704	LRPPRC	Leucine-rich PPR motif-containing protein, mitochondrial	323.31	28	51.2	7356400000	4994800000	6681700000	7614800000	259	209	186	272
P42765	ACAA2	3-ketoacyl-CoA thiolase, mitochondrial	323.31	11	34.8	411780000	418040000	5390300000	8860000000	17	21	120	156
P42766	RPL35	60S ribosomal protein L35	98.911	8	42.5	2840800000	1937300000	1480300000	1482800000	38	40	23	22
P42771	CDKN2A	Cyclin-dependent kinase inhibitor 2A	238.87	12	13	0	0	1026800000	605670000	0	0	24	22
P42785	PRCP	Lysosomal Pro-X carboxypeptidase	30.156	2	44.3	338150000	434490000	746250000	0	3	0	28	0
P43007	SLC1A4	Neutral amino acid transporter A	7.9595	2	31.7	0	0	0	46055000	0	0	0	4
P43034	PAFAH1B1	Platelet-activating factor acetylhydrolase IB subunit alpha	100.19	3	7.4	954600000	660770000	1371500000	739170000	48	35	55	29
P43121	MCAM	Cell surface glycoprotein MUC18	52.536	1	8	0	64231000	60072000	52374000	0	22	6	10
P43146	DCC	Netrin receptor DCC	3.6734	32	52.4	0	0	72855000	0	0	0	2	6
P43243	MATR3	Matrin-3	323.31	30	53.3	6115800000	4312000000	10123000000	17538000000	138	127	189	289
P43246	MSH2	DNA mismatch repair protein Msh2	142.78	33	59.5	730600000	0	1246200000	758620000	26	14	103	42
P43304	GPD2	Glycerol-3-phosphate dehydrogenase, mitochondrial	160.57	1	7.5	386690000	650550000	2253400000	1345100000	12	25	103	81
P43307	SSR1	Translocon-associated protein subunit alpha	15.705	6	20.5	173880000	204290000	275840000	410650000	8	16	17	16
P43353	ALDH3B1	Aldehyde dehydrogenase family 3 member B1	3.5806	26	66.5	0	30410000	0	0	2	4	0	0
P43362	ENSG00000267978	Melanoma antigen family A, 9B	4.2359	1	3.8	0	0	0	51933000	0	0	0	5
P43363	MAGEA10	Melanoma-associated antigen 10	20.57	45	65.5	0	0	313630000	0	0	0	23	1
P43405	SYK	Tyrosine-protein kinase SYK	5.6647	2	9.9	0	0	0	106020000	0	0	0	8
P43487	RANBP1	Ran-specific GTPase-activating protein	323.31	4	11.3	2234900000	4566900000	4512300000	4926700000	48	64	52	74
P43490	NAMPT	Nicotinamide phosphoribosyltransferase	323.31	6	65	3215500000	7747700000	1665700000	1272300000	103	201	31	47
P43686	PSMC4	26S proteasome regulatory subunit 6B	306.29	4	26.6	2028500000	1586000000	1884600000	1554500000	89	69	72	74
P43897	TSFM	Elongation factor Ts, mitochondrial	103.29	35	63.5	227030000	625040000	276220000	837860000	9	34	8	32
P45877	PPIC	Peptidyl-prolyl cis-trans isomerase C	1.9807	22	52.9	0	0	66116000	0	0	0	5	0
P45880	VDAC2	Voltage-dependent anion-selective channel protein 2	323.31	19	82.7	2805500000	3594800000	3664100000	5133100000	77	82	73	93
P45954	ACADSB	Short/branched chain specific acyl-CoA dehydrogenase, mitochondrial	17.619	9	38.6	0	0	40881000	0	0	1	3	0
P45973	CBX5	Chromobox protein homolog 5	217.61	20	56.4	668310000	846480000	1623700000	2199300000	16	29	51	47
P45974	USP5	Ubiquitin carboxyl-terminal hydrolase 5	243.91	6	67.8	1315500000	470320000	1846800000	1182300000	50	16	55	55
P45985	MAP2K4	Dual specificity mitogen-activated protein kinase kinase 4	4.2558	12	40.8	113140000	0	0	0	2	3	0	0
P46013	MKI67	Proliferation marker protein Ki-67	61.077	19	61.9	176430000	132270000	72576000	478710000	34	19	3	54
P46060	RANGAP1	Ran GTPase-activating protein 1	247.07	8	10.1	666160000	1423000000	796060000	1306900000	44	102	22	68
P46063	RECQL	ATP-dependent DNA helicase Q1	101.36	6	53.1	515830000	322650000	508290000	391260000	38	20	31	37
P46087	NOP2	Probable 28S rRNA (cytosine(4447)-C(5))-methyltransferase	36.845	4	11.6	730620000	579800000	989770000	688860000	40	28	41	28
P46100	ATRX	Transcriptional regulator ATRX	9.8704	9	51	0	0	0	119970000	0	0	2	11
P46108	CRK	Adapter molecule crk	15.679	2	1.6	183270000	176290000	159300000	70121000	13	15	14	1
P46109	CRKL	Crk-like protein	34.86	137	66.9	0	340040000	496880000	226320000	5	14	36	17
P46379	BAG6	Large proline-rich protein BAG6	83.069	57	46.5	134220000	294960000	322090000	293430000	6	14	20	26
P46459	NSF	Vesicle-fusing ATPase	116.57	26	40.8	284830000	376550000	870170000	1414700000	9	18	39	81
P46776	RPL27A	Ribosomal protein L27a	108.06	2	5.5	2985600000	3194400000	3171600000	2015300000	68	58	30	39
P46777	RPL5	60S ribosomal protein L5	202.37	9	22.8	6682500000	6215600000	6250700000	6054300000	120	121	72	74
P46778	RPL21	60S ribosomal protein L21	126.75	10	39.5	3165100000	2995600000	2313100000	2558700000	49	52	11	41
P46779	RPL28	60S ribosomal protein L28	323.31	10	22.8	2666700000	2050200000	1901800000	2042200000	33	29	20	18
P46781	RPS9	Ribosomal protein S9	119.12	11	10	5922000000	4630200000	5928600000	3868900000	105	98	58	66
P46782	RPS5	Ribosomal protein S5	323.31	13	30.9	6768100000	6397200000	3392800000	4484900000	78	72	49	61
P46783	RPS10	40S ribosomal protein S10	175.5	2	10.6	4077400000	3915600000	2164500000	3236500000	106	107	34	91
P46821	MAP1B	Microtubule-associated protein 1B	323.31	4	50.9	5118700000	340930000	9145500000	30757000000	184	7	242	654
P46926	GNPDA1	Glucosamine-6-phosphate isomerase 1	65.089	6	21.5	371330000	630120000	502900000	162230000	29	46	26	7
P46939	UTRN	Utrophin	11.06	2	8.6	0	0	0	39326000	2	0	1	7
P46940	IQGAP1	Ras GTPase-activating-like protein IQGAP1	323.31	29	75.1	5269700000	5441900000	3342500000	3636700000	271	228	97	144
P46976	GYG1	Glycogenin-1	5.4072	6	38	0	51083000	0	0	2	4	1	1
P46977	STT3A	Dolichyl-diphosphooligosaccharide--protein glycosyltransferase subunit STT3A	42.16	7	64.3	243000000	347820000	324930000	384890000	9	8	24	30
P47224	RABIF	Guanine nucleotide exchange factor MSS4	5.6331	1	1.7	0	45033000	0	0	2	4	0	2
P47712	PLA2G4A	Cytosolic phospholipase A2	7.0799	7	43.8	0	0	0	0	2	0	0	0
P47755	CAPZA2	F-actin-capping protein subunit alpha-2	60.932	12	41.9	497360000	581480000	295750000	293930000	31	23	5	16
P47756	CAPZB	F-actin-capping protein subunit beta	198.79	7	41.6	1116100000	1192200000	1358400000	678880000	41	57	34	16
P47813	EIF1AX	Eukaryotic translation initiation factor 1A, X-chromosomal	27.795	11	31.1	766170000	612340000	691470000	629700000	38	28	18	15
P47895	ALDH1A3	Aldehyde dehydrogenase family 1 member A3	3.3967	28	53.6	0	34636000	0	0	1	4	1	0
P47897	QARS	Glutamine--tRNA ligase	288.97	4	28.4	1149600000	1650700000	1091800000	1305200000	50	104	43	71
P47914	RPL29	60S ribosomal protein L29	41.019	40	56.9	1476100000	1667100000	1023400000	758180000	18	15	15	8
P47985	UQCRFS1	Cytochrome b-c1 complex subunit Rieske, mitochondrial	106.88	23	63	2060200000	1177600000	1716200000	3928900000	36	23	33	55
P48047	ATP5O	ATP synthase subunit O, mitochondrial	214.92	4	73.7	1358700000	1564600000	4217300000	4042200000	42	49	53	67
P48059	LIMS1	LIM and senescent cell antigen-like-containing domain protein 1	7.096	15	31.1	94219000	0	0	100110000	8	5	2	3
P48147	PREP	Prolyl endopeptidase	69.934	10	35.2	0	100060000	386210000	864780000	7	9	23	48
P48163	ME1	Malic enzyme 1	84.206	3	32.8	265270000	0	0	0	27	8	0	0
P48380	RFX3	Transcription factor RFX3	33.482	13	34.9	0	0	0	85633000	0	0	0	6
P48431	SOX2	Transcription factor SOX-2	26.054	5	28.9	0	0	0	186340000	0	0	1	16
P48444	ARCN1	Coatomer subunit delta	77.343	6	38.2	639470000	667090000	712310000	737810000	35	48	33	59
P48449	LSS	Lanosterol synthase	9.4984	8	21.3	0	0	0	64930000	2	1	0	13
P48506	GCLC	Glutamate-cysteine ligase catalytic subunit	115.96	4	30.1	995820000	0	0	242740000	81	0	1	6
P48507	GCLM	Glutamate-cysteine ligase modifier subunit	70.207	13	36.5	584160000	135990000	130570000	0	35	10	4	0
P48509	CD151	CD151 antigen	3.323	19	91	49864000	0	0	0	6	1	0	0
P48556	PSMD8	26S proteasome non-ATPase regulatory subunit 8	94.171	16	45.1	393020000	326570000	235920000	286020000	26	14	7	17
P48634	PRRC2A	Protein PRRC2A	4.615	8	52.9	0	0	30199000	0	0	2	2	0
P48637	GSS	Glutathione synthetase	29.09	15	59.6	229340000	299800000	306450000	170320000	10	25	13	7
P48643	CCT5	T-complex protein 1 subunit epsilon	323.31	7	48.3	6243600000	5509900000	4930700000	4524900000	187	166	126	150
P48651	PTDSS1	Phosphatidylserine synthase 1	4.8828	22	53.5	0	0	0	15761000	0	0	0	6
P48681	NES	Nestin	49.241	43	60.1	0	97550000	0	0	0	24	0	0
P48729	CSNK1A1	Casein kinase I isoform alpha	21.183	27	73	0	0	114630000	325250000	9	6	4	32
P48730	CSNK1D	Casein kinase I isoform delta	2.5242	12	57.2	0	0	47847000	38286000	0	0	0	6
P48735	IDH2	Isocitrate dehydrogenase [NADP], mitochondrial	323.31	17	50.6	402570000	494610000	10507000000	8378500000	21	26	124	119
P48739	PITPNB	Phosphatidylinositol transfer protein beta isoform	112.83	2	1.5	399490000	955350000	556980000	604640000	12	79	18	33
P48960	CD97	CD97 antigen	9.478	1	13.1	0	54574000	0	0	0	6	0	0
P49005	POLD2	DNA polymerase delta subunit 2	5.0315	12	37.9	0	0	52236000	0	1	0	3	2
P49006	MARCKSL1	MARCKS-related protein	257.28	10	47	0	287110000	936450000	727840000	1	7	32	16
P49023	PXN	Paxillin	127.88	12	45.8	129820000	199550000	62759000	119830000	8	17	3	12
P49069	CAMLG	Calcium signal-modulating cyclophilin ligand	21.26	12	51.7	0	0	0	5766300	0	0	0	1
P49189	ALDH9A1	4-trimethylaminobutyraldehyde dehydrogenase	87.941	3	11.3	519760000	906060000	1304700000	1593900000	17	37	37	55
P49207	RPL34	60S ribosomal protein L34	17.1	4	13.9	2121900000	2096500000	2058200000	1563000000	40	30	22	18
P49257	LMAN1	Protein ERGIC-53	291.6	22	58.2	408570000	497390000	1293800000	5082500000	16	9	34	78
P49321	NASP	Nuclear autoantigenic sperm protein	323.31	8	36	1547500000	1091500000	4836000000	1847400000	45	43	115	63
P49327	FASN	Fatty acid synthase	323.31	2	19.4	13912000000	12781000000	12106000000	13027000000	482	498	353	427
P49354	FNTA	Protein farnesyltransferase/geranylgeranyltransferase type-1 subunit alpha	12.018	2	9.1	0	82090000	87731000	67685000	6	5	9	7
P49356	FNTB	Protein farnesyltransferase subunit beta	2.6635	10	33.5	18561000	0	0	0	2	1	2	2
P49366	DHPS	Deoxyhypusine synthase	16.821	4	30.9	0	36970000	38387000	0	0	7	1	11
P49368	CCT3	T-complex protein 1 subunit gamma	323.31	22	49.5	7136500000	6999000000	4942800000	5835200000	206	200	110	138
P49406	MRPL19	Mitochondrial ribosomal protein L19	8.6201	10	32.9	43770000	75187000	70792000	0	6	6	7	8
P49411	TUFM	Elongation factor Tu, mitochondrial	323.31	17	61.5	5725600000	6992600000	14351000000	14760000000	129	169	180	230
P49418	AMPH	Amphiphysin	9.2135	17	66.5	0	0	0	112040000	0	0	0	9
P49419	ALDH7A1	Alpha-aminoadipic semialdehyde dehydrogenase	258.87	10	43.8	937760000	797520000	1456900000	3739000000	17	14	25	88
P49454	CENPF	Centromere protein F	1.95	30	54.1	0	0	0	27431000	0	0	2	2
P49458	SRP9	Signal recognition particle 9 kDa protein	80.117	21	59.3	678840000	506270000	1427900000	1462100000	32	25	19	26
P49459	UBE2A	Ubiquitin-conjugating enzyme E2 A	3.3836	7	60.5	60903000	0	0	0	4	5	0	2
P49585	PCYT1A	Choline-phosphate cytidylyltransferase A	18.655	2	6.8	0	213450000	0	87408000	0	25	0	0
P49588	AARS	Alanine--tRNA ligase, cytoplasmic	323.31	5	41	3240200000	3318000000	1653300000	1983700000	183	160	56	86
P49589	CARS	Cysteine--tRNA ligase, cytoplasmic	31.955	7	40.9	198040000	170420000	127380000	120310000	17	6	6	19
P49590	HARS2	Probable histidine--tRNA ligase, mitochondrial	57.903	2	12.7	0	0	81911000	100960000	1	0	9	5
P49591	SARS	Serine--tRNA ligase, cytoplasmic	171.87	2	8	646530000	718180000	754540000	891850000	28	28	36	48
P49593	PPM1F	Protein phosphatase 1F	6.475	33	56	0	0	0	0	0	4	0	0
P49643	PRIM2	DNA primase large subunit	2.6562	44	45.7	0	0	0	54142000	3	0	0	3
P49711	CTCF	Transcriptional repressor CTCF	47.788	6	60.2	0	0	74072000	54450000	0	0	7	5
P49720	PSMB3	Proteasome subunit beta type-3	54.408	3	9.6	894480000	682180000	282990000	417500000	30	27	6	14
P49721	PSMB2	Proteasome subunit beta type-2	64.956	1	28.5	887370000	821990000	516560000	438240000	40	32	11	18
P49736	MCM2	DNA replication licensing factor MCM2	251.12	8	35.4	1644100000	1473900000	2751700000	2393800000	87	62	88	99
P49748	ACADVL	Very long-chain specific acyl-CoA dehydrogenase, mitochondrial	323.31	22	69.3	1213300000	2214500000	1158900000	1405400000	70	138	47	78
P49750	YLPM1	YLP motif-containing protein 1	64.707	9	57.7	0	0	304330000	348920000	1	0	17	42
P49753	ACOT2	Acyl-coenzyme A thioesterase 2, mitochondrial	2.6109	25	44	65324000	0	0	0	0	0	4	5
P49755	TMED10	Transmembrane emp24 domain-containing protein 10	121.48	22	30	1392700000	879530000	1882100000	2801900000	29	27	34	55
P49756	RBM25	RNA-binding protein 25	78.668	13	69.7	172850000	335060000	405650000	589680000	10	21	21	43
P49757	NUMB	Protein numb homolog	2.2881	2	1.8	0	0	0	311140000	0	0	4	7
P49761	CLK3	Dual specificity protein kinase CLK3	2.904	3	11.9	0	0	8088800	0	0	0	2	1
P49770	EIF2B2	Translation initiation factor eIF-2B subunit beta	7.2327	2	9.1	0	0	123320000	0	2	4	7	4
P49773	HINT1	Histidine triad nucleotide-binding protein 1	188.94	3	41.7	3220800000	1997300000	2705800000	5465600000	67	68	28	69
P49790	NUP153	Nuclear pore complex protein Nup153	41.271	1	4.4	0	0	80297000	473240000	0	3	2	33
P49792	RANBP2	E3 SUMO-protein ligase RanBP2	99.861	9	8.7	98409000	63270000	158000000	718260000	18	20	14	70
P49821	NDUFV1	NADH dehydrogenase [ubiquinone] flavoprotein 1, mitochondrial	97.924	2	4.9	224990000	467630000	903360000	535170000	19	33	45	39
P49840	GSK3A	Glycogen synthase kinase-3 alpha	34.087	72	59.4	115590000	0	90384000	113200000	10	0	6	16
P49841	GSK3B	Glycogen synthase kinase-3 beta	18.564	25	76.3	0	0	113410000	98496000	0	5	9	12
P49902	NT5C2	Cytosolic purine 5'-nucleotidase	51.507	5	30.1	306020000	297760000	0	0	15	37	1	1
P49903	SEPHS1	Selenide, water dikinase 1	24.414	5	59	100810000	100090000	90903000	81558000	9	4	5	11
P49915	GMPS	GMP synthase [glutamine-hydrolyzing]	323.31	8	19.4	2070800000	1972300000	4480100000	1759300000	95	98	146	95
P49916	LIG3	DNA ligase 3	26.717	2	7.5	0	0	118690000	168030000	1	0	14	34
P49959	MRE11A	Double-strand break repair protein MRE11	53.501	19	63.9	0	0	85966000	556490000	0	0	3	40
P50120	RBP2	Retinol-binding protein 2	1.8026	6	12.2	0	0	0	48885000	1	0	0	1
P50148	GNAQ	Guanine nucleotide-binding protein G(q) subunit alpha	31.744	4	4.1	0	0	166510000	232750000	0	0	1	26
P50150	GNG4	Guanine nucleotide-binding protein G(I)/G(S)/G(O) subunit gamma-4	7.1628	43	55	0	0	100740000	101940000	0	0	6	11
P50213	IDH3A	Isocitrate dehydrogenase [NAD] subunit alpha, mitochondrial	95.733	33	46.6	759650000	599170000	687150000	738690000	30	27	34	41
P50238	CRIP1	Cysteine-rich protein 1	90.876	29	58.7	4606900000	412330000	0	395940000	57	3	0	13
P50336	PPOX	Protoporphyrinogen oxidase	54.893	4	21	0	0	132750000	198750000	0	0	4	9
P50395	GDI2	Rab GDP dissociation inhibitor beta	323.31	3	10	7309400000	4877000000	6142500000	4243000000	179	138	116	119
P50402	EMD	Emerin	118.65	2	12.1	403030000	564320000	531450000	513330000	34	29	28	26
P50416	CPT1A	Carnitine O-palmitoyltransferase 1, liver isoform	15.802	3	14.9	60532000	0	0	0	6	4	0	0
P50440	GATM	Glycine amidinotransferase, mitochondrial	3.142	8	19.5	0	0	56728000	0	0	0	3	0
P50453	SERPINB9	Serpin B9	18.755	7	59.7	116120000	0	0	0	13	0	0	1
P50454	SERPINH1	Serpin H1	143.07	29	71.3	1916500000	1984500000	825450000	344420000	74	80	18	11
P50479	PDLIM4	PDZ and LIM domain protein 4	18.413	21	79.9	0	298670000	0	0	0	18	0	0
P50502	ST13	Hsc70-interacting protein	141.77	12	52.6	1151700000	1430300000	896810000	1609600000	35	41	18	38
P50548	ERF	ETS domain-containing transcription factor ERF	2.9988	2	10.8	0	0	0	0	0	0	0	1
P50552	VASP	Vasodilator-stimulated phosphoprotein	35.459	12	58.2	765220000	255380000	227780000	0	28	6	9	7
P50570	DNM2	Dynamin-2	204.05	1	5.1	325120000	505340000	885980000	1076600000	8	23	47	79
P50579	METAP2	Methionine aminopeptidase 2	75.088	12	66.5	681610000	680890000	461620000	360690000	44	20	7	13
P50583	NUDT2	Bis(5'-nucleosyl)-tetraphosphatase [asymmetrical]	5.416	24	49	0	0	119140000	91425000	0	2	8	7
P50613	CDK7	Cyclin-dependent kinase 7	3.0648	4	14	0	58054000	0	0	0	8	3	0
Q9H2L5	RASSF4	Ras association domain-containing protein 4	2.3452	32	17.8	0	0	0	0	0	0	3	0
P50750	CDK9	Cyclin-dependent kinase 9	10.249	28	57.9	0	0	0	114800000	0	1	1	14
P50895	BCAM	Basal cell adhesion molecule	2.7157	15	33.1	0	0	0	0	4	0	0	0
P50897	PPT1	Palmitoyl-protein thioesterase 1	36.638	20	27.8	0	0	342620000	229340000	1	1	22	15
P50914	RPL14	60S ribosomal protein L14	97.356	6	3.4	2378700000	1925100000	2037100000	1853100000	37	46	31	35
P50990	CCT8	T-complex protein 1 subunit theta	323.31	8	33.6	6341500000	5087200000	5101700000	5171700000	216	170	99	138
P50991	CCT4	T-complex protein 1 subunit delta	323.31	9	32.7	5788100000	4400500000	3678100000	3634400000	144	127	80	90
P50995	ANXA11	Annexin A11	74.29	13	21.5	1528600000	1347100000	1144900000	594910000	44	56	30	19
P51114	FXR1	Fragile X mental retardation syndrome-related protein 1	52.22	28	43	460310000	654710000	560450000	822690000	20	30	18	40
P51116	FXR2	Fragile X mental retardation syndrome-related protein 2	39.912	10	39.9	0	0	115270000	194790000	2	2	3	20
P51148	RAB5C	Ras-related protein Rab-5C	167.01	18	56.9	1280900000	1121300000	1166700000	1251400000	50	48	32	51
P51149	RAB7A	Ras-related protein Rab-7a	253.66	8	32.5	1385800000	2079700000	2265200000	1868400000	49	69	69	60
P51153	RAB13	Ras-related protein Rab-13	3.4158	9	42.3	0	0	39776000	0	5	2	2	0
P51398	DAP3	28S ribosomal protein S29, mitochondrial	80.651	16	51	201110000	121130000	357090000	400630000	13	12	30	38
P51452	DUSP3	Dual specificity protein phosphatase 3	5.9382	14	67.2	84165000	83705000	92204000	0	6	7	4	0
P51513	NOVA1	RNA-binding protein Nova-1	14.28	9	52.7	0	0	94565000	0	0	0	11	0
P51531	SMARCA2	Probable global transcription activator SNF2L2	7.6339	102	54.7	0	0	189890000	0	0	0	13	0
P51532	SMARCA4	Transcription activator BRG1	103.47	7	59.9	0	997630000	732030000	1263900000	0	1	27	83
P51553	IDH3G	Isocitrate dehydrogenase [NAD] subunit gamma, mitochondrial	39.907	8	3.8	0	0	217660000	200980000	5	2	11	10
P51570	GALK1	Galactokinase	121.03	81	63.1	292310000	317970000	597150000	289860000	13	27	34	16
P51571	SSR4	Translocon-associated protein subunit delta	27.311	4	12.9	573640000	565580000	513680000	782010000	21	40	17	24
P51572	BCAP31	B-cell receptor-associated protein 31	34.901	10	16.7	894990000	798190000	575750000	725190000	25	33	9	25
P51580	TPMT	Thiopurine S-methyltransferase	5.7665	2	22	0	0	112300000	0	0	0	13	1
P51610	HCFC1	Host cell factor 1	161.52	1	3.2	71498000	0	546690000	979680000	9	17	35	56
P51648	ALDH3A2	Fatty aldehyde dehydrogenase	37.925	8	48.6	1337300000	90014000	350260000	422990000	56	2	20	27
P51649	ALDH5A1	Succinate-semialdehyde dehydrogenase, mitochondrial	10.591	12	61	0	0	201910000	165500000	0	0	10	5
P51659	HSD17B4	Peroxisomal multifunctional enzyme type 2	323.31	1	43.8	676250000	291830000	2732800000	3399500000	27	12	92	120
P51665	PSMD7	26S proteasome non-ATPase regulatory subunit 7	169.87	3	13.1	1019100000	1009600000	938630000	903140000	37	43	29	34
P51692	STAT5B	Signal transducer and activator of transcription 5B	3.4818	35	63	0	0	9731600	0	0	2	1	2
P51784	USP11	Ubiquitin carboxyl-terminal hydrolase 11	23.416	3	20.8	0	0	39527000	0	0	0	4	8
P51808	DYNLT3	Dynein light chain Tctex-type 3	5.1258	11	52.2	0	0	68486000	0	0	6	6	2
P51809	VAMP7	Vesicle-associated membrane protein 7	2.352	11	66.2	0	0	0	51603000	0	1	0	5
P51812	RPS6KA3	Ribosomal protein S6 kinase alpha-3	13.308	2	7.1	0	102930000	161230000	0	12	22	5	2
P51857	AKR1D1	3-oxo-5-beta-steroid 4-dehydrogenase	6.7788	20	42.7	1606200000	0	0	0	18	0	0	0
P51858	HDGF	Hepatoma-derived growth factor	323.31	10	28.3	1545200000	2074700000	1516600000	1077100000	54	67	44	36
P51946	CCNH	Cyclin-H	2.0869	3	7.6	0	0	7150800	0	0	0	2	2
P51948	MNAT1	CDK-activating kinase assembly factor MAT1	3.1393	4	14.2	0	0	0	0	0	1	0	0
P51965	UBE2E1	Ubiquitin-conjugating enzyme E2 E1	2.4977	21	43.8	0	106350000	54708000	0	5	8	3	1
P51970	NDUFA8	NADH dehydrogenase [ubiquinone] 1 alpha subcomplex subunit 8	28.693	8	13.8	324800000	435080000	647310000	520320000	15	16	20	16
P51991	HNRNPA3	Heterogeneous nuclear ribonucleoprotein A3	323.31	21	43.2	6889400000	5050900000	15039000000	12263000000	131	105	157	139
P52209	PGD	6-phosphogluconate dehydrogenase, decarboxylating	323.31	6	27.4	21179000000	1624600000	3350600000	2207700000	328	61	56	62
P52272	HNRNPM	Heterogeneous nuclear ribonucleoprotein M	323.31	1	4	7520900000	7590700000	15130000000	21421000000	184	179	205	260
P52292	KPNA2	Importin subunit alpha-1	323.31	7	27.7	3321800000	2175800000	1892700000	4092000000	106	77	49	117
P52294	KPNA1	Importin subunit alpha-5	63.759	3	2.3	0	153890000	199850000	0	2	16	10	2
P52298	NCBP2	Nuclear cap-binding protein subunit 2	4.2302	11	32.1	0	0	79797000	80629000	1	0	3	6
P52306	RAP1GDS1	Rap1 GTPase-GDP dissociation stimulator 1	11.568	32	71.3	0	0	99764000	0	0	5	8	5
P52429	DGKE	Diacylglycerol kinase epsilon	2.0325	3	9.1	0	0	0	28967000	0	0	0	2
P52434	POLR2H	DNA-directed RNA polymerases I, II, and III subunit RPABC3	72.742	12	9.5	109080000	204330000	313400000	173280000	4	9	14	16
P52435	POLR2J	DNA-directed RNA polymerase II subunit RPB11-a	2.697	9	33.5	0	0	0	0	0	0	0	0
P52565	ARHGDIA	Rho GDP-dissociation inhibitor 1	323.31	2	5.5	3677600000	3118900000	4508800000	2728100000	68	60	47	39
P52566	ARHGDIB	Rho GDP-dissociation inhibitor 2	1.9276	24	58.2	0	0	0	0	0	2	0	0
P52594	AGFG1	Arf-GAP domain and FG repeat-containing protein 1	69.152	14	71.2	176690000	0	0	0	10	2	1	0
P52597	HNRNPF	Heterogeneous nuclear ribonucleoprotein F	323.31	4	6.9	3269600000	3670300000	3930500000	3760600000	89	100	71	98
P52655	GTF2A1	Transcription initiation factor IIA subunit 1	16.682	4	12.2	0	0	0	13250000	0	0	2	2
P52701	MSH6	DNA mismatch repair protein Msh6	249.41	7	60.5	547670000	133760000	1685100000	970550000	36	17	101	50
P52735	VAV2	Guanine nucleotide exchange factor VAV2	15.854	12	33.2	0	0	0	91303000	0	2	0	15
P52758	HRSP12	2-iminobutanoate/2-iminopropanoate deaminase	9.8455	2	15.9	0	0	0	52409000	2	4	2	7
P52788	SMS	Spermine synthase	270.67	20	44.3	378040000	1020500000	851930000	285430000	18	61	38	13
P52789	HK2	Hexokinase-2	24.513	7	37.6	0	90831000	0	0	0	14	10	0
P52815	MRPL12	39S ribosomal protein L12, mitochondrial	107.34	16	37.5	895270000	687650000	1765100000	1165700000	44	31	28	21
P52823	STC1	Stanniocalcin-1	24.28	21	40.7	0	0	0	234350000	0	0	0	12
P52888	THOP1	Thimet oligopeptidase	28.432	103	59.6	123890000	313000000	257960000	316210000	9	42	9	31
P52895	AKR1C2	Aldo-keto reductase family 1 member C2	148.46	6	21.1	6193200000	0	0	0	65	0	0	0
P52907	CAPZA1	F-actin-capping protein subunit alpha-1	232.12	1	4.3	1001100000	913550000	1425000000	391480000	30	41	36	19
P52926	HMGA2	High mobility group protein HMGI-C	4.4978	10	47.7	0	0	0	0	2	3	0	0
P52943	CRIP2	Cysteine rich protein 2	262.88	30	62.2	920750000	1598100000	3537500000	2353700000	21	44	54	49
P52948	NUP98	Nuclear pore complex protein Nup98-Nup96	37.301	6	22.6	239860000	0	93702000	531600000	8	2	3	38
P53004	BLVRA	Biliverdin reductase A	232.02	31	71.9	599550000	778160000	1157800000	0	31	61	56	0
P53007	SLC25A1	Tricarboxylate transport protein, mitochondrial	96.954	4	9.9	468720000	709310000	546900000	986090000	10	32	18	40
P53041	PPP5C	Serine/threonine-protein phosphatase 5	37.816	19	52.9	165210000	0	555230000	372760000	15	3	26	15
P53350	PLK1	Serine/threonine-protein kinase PLK1	14.838	2	0.6	0	0	0	21208000	2	0	0	4
P53367	ARFIP1	Arfaptin-1	8.6659	5	51.2	0	0	0	0	3	4	0	0
P53384	NUBP1	Cytosolic Fe-S cluster assembly factor NUBP1	3.4936	2	17.8	0	0	0	0	0	1	0	0
P53396	ACLY	ATP-citrate synthase	323.31	8	28.1	13675000000	6090600000	7214600000	9445800000	351	202	182	237
P53582	METAP1	Methionine aminopeptidase 1	126.93	37	53.2	459480000	434770000	639230000	0	22	8	33	4
P53597	SUCLG1	Succinate--CoA ligase [ADP/GDP-forming] subunit alpha, mitochondrial	50.094	13	21.7	306840000	338810000	497080000	476040000	15	14	21	20
P53602	MVD	Diphosphomevalonate decarboxylase	2.1841	6	25.5	0	0	0	0	0	1	0	0
P53618	COPB1	Coatomer subunit beta	136.48	19	48.8	998990000	958470000	740390000	1266500000	54	55	17	79
P53621	COPA	Coatomer subunit alpha	225.47	1	5.7	1975000000	1996700000	1772200000	1867700000	101	134	87	131
P53634	CTSC	Dipeptidyl peptidase 1	242.25	2	4.9	0	0	703790000	1861100000	0	2	21	75
P53677	AP3M2	AP-3 complex subunit mu-2	1.7962	6	14.3	0	0	0	10749000	0	0	0	3
P53680	AP2S1	AP-2 complex subunit sigma	3.2877	9	49.3	128580000	0	84487000	108330000	6	4	1	5
P53701	HCCS	Cytochrome c-type heme lyase	1.9076	7	45.3	0	0	23394000	0	0	1	3	2
P53801	PTTG1IP	Pituitary tumor-transforming gene 1 protein-interacting protein	3.6374	26	39.6	0	0	0	78477000	0	0	0	8
P53803	POLR2K	DNA-directed RNA polymerases I, II, and III subunit RPABC4	2.0865	27	54.5	0	0	0	83764000	1	0	0	0
P53985	SLC16A1	Monocarboxylate transporter 1	4.7877	17	12.5	0	0	0	53321000	0	2	2	5
P53990	IST1	IST1 homolog	10.095	1	37.9	64473000	53732000	0	0	9	11	0	0
P53992	SEC24C	Protein transport protein Sec24C	30.6	9	41.1	57385000	0	32182000	0	11	20	4	9
P53999	SUB1	Activated RNA polymerase II transcriptional coactivator p15	92.954	14	25.9	1195900000	1338800000	2870400000	2056400000	57	43	33	38
P54105	CLNS1A	Methylosome subunit pICln	159.2	2	4	0	0	475290000	482310000	2	1	12	20
P54132	BLM	Bloom syndrome protein	3.4754	1	3.1	349760000	198610000	0	0	10	2	2	2
P54136	RARS	Arginine--tRNA ligase, cytoplasmic	138.32	5	18.8	1856000000	1901300000	1514400000	1531400000	112	105	34	75
P54198	HIRA	Protein HIRA	1.6853	10	84.9	0	0	0	32564000	0	0	0	0
P54219	SLC18A1	Chromaffin granule amine transporter	1.7527	14	16.5	0	0	0	0	0	0	0	2
P54289	CACNA2D1	Voltage-dependent calcium channel subunit alpha-2/delta-1	134.18	26	17.3	0	0	447800000	938250000	0	0	20	78
P54577	YARS	Tyrosine--tRNA ligase, cytoplasmic	109.81	17	52.2	898900000	944220000	928820000	870520000	50	73	41	56
P54578	USP14	Ubiquitin carboxyl-terminal hydrolase 14	323.31	7	23.4	1004100000	770580000	1085300000	2106600000	43	51	37	116
P54619	PRKAG1	5'-AMP-activated protein kinase subunit gamma-1	6.1728	7	37.1	0	0	0	16745000	0	3	1	4
P54652	HSPA2	Heat shock-related 70 kDa protein 2	25.041	10	29.9	735390000	0	0	0	42	4	0	1
P54687	BCAT1	Branched-chain-amino-acid aminotransferase, cytosolic	11.638	8	39.5	0	0	0	75319000	0	0	0	4
P54709	ATP1B3	Sodium/potassium-transporting ATPase subunit beta-3	11.232	29	54.1	0	263930000	363010000	310500000	3	16	13	15
P54725	RAD23A	UV excision repair protein RAD23 homolog A	64.924	13	16.3	0	166410000	166770000	0	0	14	14	7
P54727	RAD23B	UV excision repair protein RAD23 homolog B	323.31	16	33.6	1365000000	2172500000	1503500000	1603100000	49	83	30	61
P54750	PDE1A	Calcium/calmodulin-dependent 3',5'-cyclic nucleotide phosphodiesterase 1A	2.5868	1	11.2	0	0	0	0	0	0	0	0
P54764	EPHA4	Ephrin type-A receptor 4	5.2836	7	51.3	0	0	0	16403000	0	0	2	4
P54819	AK2	Adenylate kinase 2, mitochondrial	105.86	2	44	889180000	1110400000	964560000	758290000	47	49	44	48
P54886	ALDH18A1	Delta-1-pyrroline-5-carboxylate synthase	134.47	12	39.3	443960000	474640000	701210000	521870000	26	25	45	33
P54920	NAPA	Alpha-soluble NSF attachment protein	263.1	5	67.5	535870000	186640000	1366800000	1020700000	23	17	79	62
P55010	EIF5	Eukaryotic translation initiation factor 5	88.529	5	17.4	1140300000	1680500000	883420000	1026000000	47	55	34	44
P55011	SLC12A2	Solute carrier family 12 member 2	13.964	24	72.8	0	0	0	69429000	3	0	0	8
P55036	PSMD4	26S proteasome non-ATPase regulatory subunit 4	56.615	9	45.7	532530000	345990000	472620000	407180000	23	16	21	12
P55039	DRG2	Developmentally-regulated GTP-binding protein 2	3.0747	4	6.9	0	0	0	0	2	0	0	0
P55060	CSE1L	Exportin-2	323.31	2	7.8	17071000000	17486000000	13287000000	8585200000	127	110	67	76
P55072	VCP	Transitional endoplasmic reticulum ATPase	323.31	3	19.4	14140000000	12178000000	15383000000	14391000000	349	307	266	256
P55081	MFAP1	Microfibrillar-associated protein 1	5.5563	14	53.1	0	0	68008000	53965000	0	0	9	4
P55083	MFAP4	Microfibril-associated glycoprotein 4	46.558	7	36.4	0	0	321570000	225300000	0	0	14	17
P55084	HADHB	hydroxyacyl-CoA dehydrogenase trifunctional multienzyme complex subunit beta	196.22	10	29.8	1840900000	1539000000	2315600000	1092500000	85	73	95	45
P55145	MANF	Mesencephalic astrocyte-derived neurotrophic factor	29.742	1	4.2	0	669480000	1739800000	1842900000	8	21	54	58
P55196	MLLT4	Afadin	9.4477	10	36.3	0	0	0	10694000	0	5	1	4
P55209	NAP1L1	Nucleosome assembly protein 1-like 1	323.31	16	38.7	6143800000	3490200000	7640700000	4533700000	108	78	94	82
P55263	ADK	Adenosine kinase	121.95	13	36.4	0	1453500000	0	424580000	11	63	0	21
P55265	ADAR	Double-stranded RNA-specific adenosine deaminase	139.86	3	25.2	559320000	645660000	563290000	654400000	26	58	28	49
P55285	CDH6	Cadherin-6	7.0343	2	6.6	0	0	0	17871000	0	0	0	9
P55316	FOXG1	Forkhead box protein G1	4.1018	1	4.7	0	0	50161000	0	0	0	2	0
P55327	TPD52	Tumor protein D52	322.83	4	19.6	542650000	947470000	851410000	696260000	27	30	39	53
P55735	SEC13	Protein SEC13 homolog	289.99	2	4.6	479610000	469070000	467550000	508550000	31	36	16	30
P55769	NHP2L1	NHP2-like protein 1	78.514	3	16.3	766370000	780590000	1503800000	1049200000	20	27	33	32
P55786	NPEPPS	Puromycin-sensitive aminopeptidase	323.31	5	24.7	1959900000	2584800000	1621000000	2291500000	83	143	49	110
P55795	HNRNPH2	Heterogeneous nuclear ribonucleoprotein H2	137.46	38	71.9	335120000	448170000	845910000	869690000	15	23	30	29
P55809	OXCT1	Succinyl-CoA:3-ketoacid coenzyme A transferase 1, mitochondrial	323.31	28	59.9	0	143460000	5003500000	2810100000	2	5	123	93
P55884	EIF3B	Eukaryotic translation initiation factor 3 subunit B	323.31	17	35.2	2911000000	4426200000	2047500000	2190600000	139	187	45	97
P55957	BID	BH3-interacting domain death agonist	122.49	12	24.8	164220000	0	222130000	48450000	13	10	15	10
P56134	ATP5J2	ATP synthase subunit f, mitochondrial	57.222	6	17.1	367570000	370870000	531920000	807680000	14	23	11	19
P56178	DLX5	Homeobox protein DLX-5	4.5662	7	71.8	0	0	0	86151000	0	0	0	6
P56179	DLX6	Homeobox protein DLX-6	3.4066	14	75.8	0	0	0	80933000	0	0	0	2
P56182	RRP1	Ribosomal RNA processing protein 1 homolog A	4.4978	3	30	0	0	0	54931000	0	2	1	2
P56192	MARS	Methionine--tRNA ligase, cytoplasmic	323.31	10	37.2	966340000	690380000	1164100000	1319200000	44	27	49	94
P56211	ARPP19	cAMP-regulated phosphoprotein 19	1.6489	5	33.5	0	0	57681000	0	0	0	5	1
P56270	MAZ	Myc-associated zinc finger protein	20.869	1	8.8	0	0	220870000	419500000	0	0	9	19
P56378	C14orf2	6.8 kDa mitochondrial proteolipid	1.808	6	14.5	84970000	0	82701000	0	1	2	3	5
Q5VTU8	ATP5EP2	ATP synthase subunit epsilon-like protein, mitochondrial	4.6908	15	20.9	191780000	214290000	405880000	483330000	4	12	5	6
P56385	ATP5I	ATP synthase subunit e, mitochondrial	12.222	6	27.5	242290000	279650000	399900000	657200000	20	16	8	33
P56537	EIF6	Eukaryotic translation initiation factor 6	268.64	10	48.2	1843200000	2268100000	944310000	1057000000	30	49	24	35
P56545	CTBP2	C-terminal-binding protein 2	16.247	6	37	257180000	245410000	334150000	318780000	17	10	11	14
P56556	NDUFA6	NADH dehydrogenase [ubiquinone] 1 alpha subcomplex subunit 6	3.9725	9	30.1	103740000	0	0	379580000	2	5	3	11
P56945	BCAR1	Breast cancer anti-estrogen resistance protein 1	8.745	5	22.4	0	0	5176100	0	0	4	0	0
P57088	TMEM33	Transmembrane protein 33	28.767	23	18.9	187910000	212080000	132090000	97995000	18	25	12	2
P57105	SYNJ2BP	Synaptojanin-2-binding protein	4.7823	14	37.1	0	0	0	80104000	0	0	3	4
P57721	PCBP3	Poly(rC)-binding protein 3	3.8803	4	11.8	0	0	0	148670000	1	0	4	7
P57737	CORO7	Coronin-7	34.064	30	58	0	0	146870000	115820000	0	0	10	17
P57740	NUP107	Nuclear pore complex protein Nup107	11.162	10	43.8	0	0	0	70227000	0	0	1	8
P57772	EEFSEC	Selenocysteine-specific elongation factor	2.0558	2	4.3	0	0	40698000	0	0	0	1	2
P58005	SESN3	Sestrin-3	1.7697	4	7	0	0	0	0	0	0	0	1
P58107	EPPK1	Epiplakin	165.95	3	44	0	461090000	0	132580000	0	37	0	5
P58546	MTPN	Myotrophin	183	3	17.3	834740000	1163800000	1142800000	482000000	22	26	17	21
P59768	GNG2	Guanine nucleotide-binding protein G(I)/G(S)/G(O) subunit gamma-2	30.441	10	24.7	0	0	0	822280000	0	0	0	13
P59998	ARPC4	Actin-related protein 2/3 complex subunit 4	35.145	2	3.1	836910000	979350000	589920000	393430000	33	40	20	14
P60002	ELOF1	Transcription elongation factor 1 homolog	3.6987	12	72.1	0	0	0	83892000	0	1	3	7
P60033	CD81	CD81 antigen	4.6924	3	12.7	0	160990000	0	218760000	3	2	0	3
P60059	SEC61G	Protein transport protein Sec61 subunit gamma	28.376	1	7.1	0	0	0	0	0	0	0	0
P60174	TPI1	Triosephosphate isomerase 1	323.31	1	19.2	25581000000	18979000000	34580000000	21722000000	198	183	213	167
P60228	EIF3E	Eukaryotic translation initiation factor 3 subunit E	94.565	4	35.5	1764800000	1502300000	857610000	911720000	81	79	42	42
P60468	SEC61B	Protein transport protein Sec61 subunit beta	10.797	26	52.4	129960000	142120000	129860000	217560000	9	8	5	6
P60510	PPP4C	Serine/threonine-protein phosphatase 4 catalytic subunit	23.359	32	72.7	0	0	0	210800000	2	5	1	15
P60520	GABARAPL2	Gamma-aminobutyric acid receptor-associated protein-like 2	4.0928	47	73.3	0	0	43783000	0	0	2	5	0
P60602	ROMO1	Reactive oxygen species modulator 1	66.815	16	58.8	0	0	0	290310000	6	5	3	7
P60604	UBE2G2	Ubiquitin-conjugating enzyme E2 G2	3.275	7	23.6	107160000	0	0	81937000	2	0	2	5
P60660	MYL6	Myosin light polypeptide 6	323.31	4	25	1863500000	4042500000	1279300000	983470000	28	36	22	15
P60709	ACTB	Actin, cytoplasmic 1	285.78	6	14.3	0	0	0	0	0	0	0	0
P60842	EIF4A1	Eukaryotic initiation factor 4A-I	323.31	1	2.3	15425000000	18278000000	12616000000	9246900000	216	253	146	141
P60866	RPS20	Ribosomal protein S20	98.002	8	72	3264600000	2928100000	2824400000	2184900000	53	50	33	32
P60880	SNAP25	Synaptosomal-associated protein 25	187.54	1	15.4	0	0	346450000	713520000	0	0	14	30
P60891	PRPS1	Ribose-phosphate pyrophosphokinase 1	117.29	11	78.4	1530400000	1928700000	2336800000	3675400000	54	52	66	74
P60900	PSMA6	Proteasome subunit alpha type-6	152.84	1	6.5	1886800000	1565300000	1150600000	969990000	71	56	29	26
P60903	S100A10	Protein S100-A10	129.44	3	13	8015000000	4771300000	0	1040700000	69	57	0	19
P60953	CDC42	Cell division control protein 42 homolog	104.75	13	59.8	1292300000	1344400000	1040500000	1293500000	51	48	31	53
P60981	DSTN	Destrin	273.53	1	11.4	3166700000	2558900000	1122400000	1893300000	81	64	19	58
P60983	GMFB	Glia maturation factor beta	128.29	28	33.6	330980000	328010000	557620000	360150000	18	11	31	31
P61006	RAB8A	Ras-related protein Rab-8A	51.737	6	11.4	107940000	95848000	112670000	391550000	3	3	2	18
P61009	SPCS3	Signal peptidase complex subunit 3	3.7202	3	33.6	0	0	0	219500000	3	3	5	13
P61011	SRP54	Signal recognition particle 54 kDa protein	92.215	13	68.3	342510000	335290000	577250000	339400000	14	9	30	31
P61019	RAB2A	Ras-related protein Rab-2A	323.31	12	21	1056400000	680270000	1174000000	3017300000	41	25	38	80
P61024	CKS1B	Cyclin-dependent kinases regulatory subunit 1	25.49	7	53.5	154560000	184460000	0	143600000	16	23	0	1
P61026	RAB10	Ras-related protein Rab-10	19.693	3	22.7	1668700000	618910000	562570000	560290000	35	8	9	13
P61073	CXCR4	C-X-C chemokine receptor type 4	2.5077	14	25.7	0	0	0	10573000	0	0	0	1
P62837	UBE2D2	Ubiquitin-conjugating enzyme E2 D2	26.799	5	77.4	402980000	291110000	418550000	301360000	10	7	19	16
P61081	UBE2M	NEDD8-conjugating enzyme Ubc12	16.435	12	69.6	409620000	710230000	625360000	488360000	16	19	17	18
P61086	UBE2K	Ubiquitin-conjugating enzyme E2 K	12.989	1	21.1	128520000	188580000	215140000	143900000	5	14	3	4
P61088	UBE2N	Ubiquitin-conjugating enzyme E2 N	99.328	8	69.2	1230100000	969450000	2094700000	1760600000	42	38	48	47
P61106	RAB14	Ras-related protein Rab-14	199.34	19	15.8	831480000	793660000	575070000	1363700000	34	47	17	63
P61158	ACTR3	Actin-related protein 3	323.31	14	56.4	2504200000	2916800000	2083300000	1335100000	106	131	58	51
P61160	ACTR2	Actin-related protein 2	228.86	12	48.2	1671800000	1895600000	1312200000	889890000	48	56	30	33
P61163	ACTR1A	Alpha-centractin	230.64	10	23.4	1138400000	1492900000	1098800000	1046200000	62	86	41	56
P61165	TMEM258	Transmembrane protein 258	2.3091	4	12.6	0	0	0	0	0	0	0	0
P61201	COPS2	COP9 signalosome complex subunit 2	18.575	2	10.7	99455000	98626000	114730000	114470000	7	11	10	10
P84077	ARF1	ADP-ribosylation factor 1	87.53	2	11.9	1179800000	1084900000	774240000	1094400000	34	34	17	17
P61221	ABCE1	ATP-binding cassette sub-family E member 1	211.43	52	53.3	1221900000	1217700000	1314700000	865440000	51	77	43	31
P61224	RAP1B	Ras-related protein Rap-1b	147.55	11	49.5	687320000	779350000	1033100000	902270000	23	33	53	54
P61225	RAP2B	Ras-related protein Rap-2b	90.563	6	25.7	0	235290000	85166000	670700000	0	11	3	44
P61247	RPS3A	40S ribosomal protein S3a	323.31	1	3.2	10358000000	8415300000	8559200000	6270500000	166	125	91	88
P61254	RPL26	Ribosomal protein L26	105.61	24	35.6	3015200000	2750700000	2957600000	2054500000	46	36	39	37
P61289	PSME3	Proteasome activator complex subunit 3	182.43	46	55.3	1088900000	1053400000	713670000	624730000	61	61	40	42
P61313	RPL15	Ribosomal protein L15	87.053	14	46.7	5536400000	5085600000	3449100000	4342100000	76	80	47	60
P61353	RPL27	60S ribosomal protein L27	239.34	1	12.1	4326300000	3764000000	4954200000	2666500000	80	74	38	34
P61421	ATP6V0D1	V-type proton ATPase subunit d 1	61.822	2	12.7	0	222470000	171210000	522830000	0	15	6	31
P61457	PCBD1	Pterin-4-alpha-carbinolamine dehydratase	21.861	3	16.9	661070000	0	0	0	28	2	0	0
P61513	RPL37A	Ribosomal protein L37a	96.957	1	3.7	1406500000	1312700000	1551000000	1130400000	25	34	31	27
P61586	RHOA	Transforming protein RhoA	137.46	1	6.1	2161200000	2073400000	2720100000	2177200000	58	55	62	64
P61601	NCALD	Neurocalcin-delta	8.6873	2	31	0	0	0	55709000	0	0	1	4
P61604	HSPE1	10 kDa heat shock protein, mitochondrial	228.71	2	6.4	9728200000	8613000000	10931000000	9340700000	93	93	77	78
P61619	SEC61A1	Protein transport protein Sec61 subunit alpha isoform 1	17.558	5	16.2	215270000	243470000	197200000	322580000	11	20	4	10
P61758	VBP1	Prefoldin subunit 3	181.73	12	17.7	458860000	714140000	575510000	281270000	16	32	21	15
P61764	STXBP1	Syntaxin-binding protein 1	168.57	9	42.5	0	0	793450000	1266100000	0	0	20	74
P61769	B2M	Beta-2-microglobulin	32.857	5	48.9	0	626310000	183840000	316090000	2	32	1	16
P61803	DAD1	Dolichyl-diphosphooligosaccharide--protein glycosyltransferase subunit DAD1	8.6475	3	2.2	0	131440000	148080000	130270000	3	5	3	6
P61916	NPC2	Epididymal secretory protein E1	44.904	36	58.5	193030000	607430000	340120000	115610000	7	24	13	6
P61923	COPZ1	Coatomer subunit zeta-1	44.717	1	3.3	402890000	390940000	308040000	365170000	20	15	6	12
P61956	SUMO2	Small ubiquitin-related modifier 2	68.044	1	2.5	974660000	529440000	725870000	870490000	9	15	10	15
P61960	UFM1	Ubiquitin-fold modifier 1	71.037	25	31.6	256320000	444600000	0	189910000	10	13	1	7
P61962	DCAF7	DDB1- and CUL4-associated factor 7	10.032	27	59.1	0	0	141060000	187410000	0	1	7	15
P61964	WDR5	WD repeat-containing protein 5	24.275	22	60.1	304470000	224070000	356630000	485620000	4	8	12	19
P61966	AP1S1	AP-1 complex subunit sigma-1A	137.58	3	13	0	107780000	0	0	4	14	0	1
P61970	NUTF2	Nuclear transport factor 2	174.32	8	33.5	1395800000	1760900000	918110000	755780000	31	46	20	24
P61978	HNRNPK	Heterogeneous nuclear ribonucleoprotein K	323.31	1	5.2	15129000000	13304000000	20910000000	29498000000	242	226	239	349
P61981	YWHAG	14-3-3 protein gamma	323.31	4	22.9	5625300000	8412900000	3760600000	6833200000	84	79	40	81
P62070	RRAS2	Ras-related protein R-Ras2	3.9478	4	21.2	0	0	0	7224000	2	4	0	0
P62072	TIMM10	Mitochondrial import inner membrane translocase subunit Tim10	16.993	14	57.2	121380000	0	133670000	131020000	8	17	2	12
P62081	RPS7	40S ribosomal protein S7	293.5	1	3	7180900000	6021300000	5554800000	3924000000	95	79	77	56
P62136	PPP1CA	Serine/threonine-protein phosphatase PP1-alpha catalytic subunit	323.31	2	5	2599000000	3125300000	3344700000	3425400000	99	96	99	122
P62140	PPP1CB	Serine/threonine-protein phosphatase PP1-beta catalytic subunit	25.962	13	74.5	395670000	259720000	431450000	456880000	21	12	16	20
P62191	PSMC1	26S proteasome regulatory subunit 4	300.19	24	37	1436700000	2416300000	1594200000	1228500000	42	98	45	42
P62195	PSMC5	26S proteasome regulatory subunit 8	251.14	14	77.6	1726500000	1413400000	2125800000	1566500000	73	65	60	56
P62241	RPS8	Ribosomal protein S8	323.31	14	36.9	8578600000	7613300000	6489400000	5890600000	99	93	74	73
P62244	RPS15A	Ribosomal protein S15a	143.02	4	6.1	3813600000	3002600000	2928900000	2493900000	84	87	38	35
P62249	RPS16	Ribosomal protein S16	55.407	9	36.9	5137900000	4079800000	3803500000	3294100000	95	104	28	42
P62253	UBE2G1	Ubiquitin-conjugating enzyme E2 G1	10.423	2	9.1	0	0	0	0	0	0	0	0
P62256	UBE2H	Ubiquitin-conjugating enzyme E2 H	11.58	33	46.3	0	204330000	0	0	4	9	0	0
P62258	YWHAE	14-3-3 protein epsilon	323.31	58	72.5	11442000000	10333000000	11509000000	8888700000	179	155	140	126
P62263	RPS14	Ribosomal protein S14	241.04	2	6.2	4560100000	4091700000	3728800000	2979000000	71	82	52	56
P62266	RPS23	40S ribosomal protein S23	92.274	3	22.7	2753200000	2273200000	1780900000	1728100000	72	49	23	42
P62269	RPS18	40S ribosomal protein S18	137.84	22	57	4578300000	3594300000	3238300000	2786400000	67	57	38	35
P62273	RPS29	Ribosomal protein S29	27.664	13	55.5	1552800000	1372600000	473450000	536850000	22	22	0	13
P62277	RPS13	Ribosomal protein S13	171.14	6	4.6	5706700000	4482600000	2641000000	3787400000	93	84	28	55
P62280	RPS11	Ribosomal protein S11	271.95	17	54.5	7209000000	4883900000	5157000000	4032700000	93	78	63	60
P62304	SNRPE	Small nuclear ribonucleoprotein E	107.38	13	39.8	993300000	827820000	946110000	1026800000	23	24	20	28
P62306	SNRPF	Small nuclear ribonucleoprotein F	53.498	24	29.2	369130000	371660000	583480000	653850000	11	14	10	10
P62310	LSM3	U6 snRNA-associated Sm-like protein LSm3	10.454	4	5.4	147470000	153090000	0	233950000	13	9	1	5
P62314	SNRPD1	Small nuclear ribonucleoprotein Sm D1	66.807	2	8.8	1084500000	1327100000	1383100000	2560100000	24	20	28	28
P62316	SNRPD2	Small nuclear ribonucleoprotein Sm D2	185.8	12	65.2	1359300000	1433000000	2235800000	2324200000	13	18	36	44
P62318	SNRPD3	Small nuclear ribonucleoprotein Sm D3	240.2	8	40.7	1233000000	1298600000	2559200000	2086700000	31	35	35	40
P62328	TMSB4X	Thymosin beta-4	323.31	7	46.9	5975600000	6439700000	2675800000	4195600000	73	62	37	45
P62330	ARF6	ADP-ribosylation factor 6	40.33	35	50.1	228690000	321940000	226770000	343950000	18	23	2	40
P62333	PSMC6	26S proteasome regulatory subunit 10B	251.32	4	29.8	1584100000	1322500000	1564400000	1386200000	81	70	45	67
P62380	TBPL1	TATA box-binding protein-like protein 1	8.0193	22	47.9	0	0	66033000	0	0	0	1	5
P62424	RPL7A	Ribosomal protein L7a	323.31	38	58.4	8603000000	7345300000	7332800000	6762200000	136	110	100	89
P62495	ETF1	Eukaryotic peptide chain release factor subunit 1	84.531	5	42.1	708360000	674040000	648620000	489110000	43	32	27	26
P62633	CNBP	Cellular nucleic acid-binding protein	41.56	4	41.5	700740000	950180000	1119000000	416910000	18	31	25	14
P62701	RPS4X	Ribosomal protein S4, X-linked	189.81	3	13.8	9596200000	7748700000	7518600000	6673000000	151	132	92	101
P62745	RHOB	Rho-related GTP-binding protein RhoB	2.6772	2	14.9	0	0	0	48622000	0	0	1	8
P62750	RPL23A	60S ribosomal protein L23a	139.33	3	10.2	3804600000	3508600000	3616700000	2455900000	58	54	35	36
P62753	RPS6	40S ribosomal protein S6	206.29	31	50.1	3792800000	3046300000	3730900000	2510200000	71	69	32	35
P62760	VSNL1	Visinin-like protein 1	5.3199	2	46.4	0	0	72419000	0	0	0	11	0
P62805	HIST1H4F	Histone cluster 1 H4 family member f	323.31	5	15.3	76508000000	52597000000	199590000000	194380000000	214	170	258	342
P62820	RAB1A	Ras-related protein Rab-1A	61.099	1	20.7	244250000	223880000	195600000	394820000	7	5	4	5
P62826	RAN	GTP-binding nuclear protein Ran	323.31	3	45.1	10487000000	6923600000	9829100000	10289000000	123	98	72	94
P62829	RPL23	Ribosomal protein L23	105.19	5	62.3	5294400000	5086900000	4685600000	3698200000	59	66	52	44
P62834	RAP1A	Ras-related protein Rap-1A	31.68	8	60	0	0	116940000	0	0	0	7	3
P62841	RPS15	Ribosomal protein S15	98.569	6	29.7	1816200000	1311800000	958410000	827030000	24	29	17	16
P62847	RPS24	40S ribosomal protein S24	178.74	3	18.8	1982700000	1866100000	1443200000	1623700000	44	49	30	41
P62851	RPS25	Ribosomal protein S25	67.702	3	6	2852500000	2179800000	2129700000	1867000000	34	33	27	16
P62854	RPS26	Ribosomal protein S26	84.292	5	23.9	3431200000	2812500000	2676000000	2483400000	58	63	39	35
P62857	RPS28	Ribosomal protein S28	45.939	2	14.5	1662800000	1645500000	1445500000	760100000	27	25	22	17
P62861	FAU	Ubiquitin-like protein FUBI	9.2058	1	17.5	930640000	732440000	672500000	347760000	17	16	10	6
P62873	GNB1	Guanine nucleotide-binding protein G(I)/G(S)/G(T) subunit beta-1	323.31	11	24.5	0	650760000	1781300000	843580000	3	8	41	34
P62875	POLR2L	DNA-directed RNA polymerases I, II, and III subunit RPABC5	16.974	6	8.3	63464000	0	81767000	0	3	0	7	2
P62877	RBX1	E3 ubiquitin-protein ligase RBX1	184.75	2	5.7	0	0	0	58065000	1	1	3	2
P62879	GNB2	Guanine nucleotide-binding protein G(I)/G(S)/G(T) subunit beta-2	323.31	1	4.1	1745800000	3616300000	3675300000	6035800000	41	106	62	111
P62888	RPL30	Ribosomal protein L30	197.66	11	24.9	3353000000	3247500000	3033700000	2419700000	55	60	30	24
Q59GN2	RPL39P5	Putative 60S ribosomal protein L39-like 5	16.455	5	66.9	369570000	290910000	342730000	289030000	7	9	8	4
P62899	RPL31	Ribosomal protein L31	60.524	5	69	2619100000	2398500000	1905100000	1525500000	47	41	11	22
P62906	RPL10A	60S ribosomal protein L10a	200.56	6	43.5	5131000000	4280700000	3543000000	3568400000	64	52	36	42
P62910	RPL32	Ribosomal protein L32	188.26	1	21.7	4775000000	4558800000	4606700000	3484400000	75	72	54	48
P62913	RPL11	60S ribosomal protein L11	216.97	2	16.5	3158800000	2975200000	3381600000	1859000000	46	46	36	28
P62917	RPL8	60S ribosomal protein L8	293.97	1	17.6	5873700000	5598400000	4475300000	4449300000	90	108	74	73
P62937	PPIA	Peptidyl-prolyl cis-trans isomerase A	323.31	21	79.7	21427000000	29070000000	37096000000	30304000000	123	133	133	124
P62942	FKBP1A	Peptidyl-prolyl cis-trans isomerase FKBP1A	94.165	18	49	1772300000	2180300000	1694700000	576130000	30	34	30	16
P62979	RPS27A	Ubiquitin-40S ribosomal protein S27a	323.31	2	27.1	13340000000	11542000000	13076000000	11071000000	101	101	109	82
P62993	GRB2	Growth factor receptor-bound protein 2	41.078	7	44	270660000	218780000	322780000	203520000	26	11	20	26
P62995	TRA2B	Transformer-2 protein homolog beta	205.4	5	35.9	1019700000	1028600000	2182400000	2692000000	35	35	51	60
P63000	RAC1	Ras-related C3 botulinum toxin substrate 1	32.993	1	21.5	1332200000	1710700000	1396900000	1782200000	43	49	25	41
P63010	AP2B1	AP-2 complex subunit beta	209.4	3	27.9	1242600000	1303100000	1014300000	1209700000	89	67	39	98
P63027	VAMP2	Vesicle-associated membrane protein 2	40.614	7	55.6	0	0	0	69284000	0	0	0	4
P63092	GNAS	Guanine nucleotide-binding protein G(s) subunit alpha isoforms XLas	78.427	1	86.9	389500000	399870000	504290000	752230000	13	16	22	54
P63096	GNAI1	Guanine nucleotide-binding protein G(i) subunit alpha-1	323.31	18	78.6	495320000	1019900000	991660000	1867800000	21	38	24	71
P63098	PPP3R1	Calcineurin subunit B type 1	8.9048	5	29.4	0	0	309340000	142300000	0	0	15	3
P63104	YWHAZ	14-3-3 protein zeta/delta	323.31	11	56.3	17878000000	26933000000	15496000000	20836000000	189	206	147	173
P63151	PPP2R2A	Serine/threonine-protein phosphatase 2A 55 kDa regulatory subunit B alpha isoform	112.65	6	58.5	493320000	423830000	773280000	611470000	19	21	35	47
P63165	SUMO1	Small ubiquitin-related modifier 1	7.0345	14	66.3	111350000	0	0	0	9	8	2	4
P63167	DYNLL1	Dynein light chain 1, cytoplasmic	323.31	5	55.7	1664000000	1512000000	2272700000	2278600000	29	26	30	25
P63172	DYNLT1	Dynein light chain Tctex-type 1	50.4	8	57.1	138580000	134370000	171790000	162600000	9	9	12	10
P63173	RPL38	Ribosomal protein L38	165.79	10	62.4	2565600000	1835700000	1162600000	1779400000	40	45	7	29
P63208	SKP1	S-phase kinase-associated protein 1	44.312	9	75.4	726360000	523830000	558940000	648360000	31	21	12	27
P63218	GNG5	Guanine nucleotide-binding protein G(I)/G(S)/G(O) subunit gamma-5	7.0251	3	43	0	0	178270000	0	0	1	2	0
P63220	RPS21	Ribosomal protein S21	323.31	2	11.7	1725800000	1628300000	1070500000	895690000	34	36	20	15
P63241	EIF5A	Eukaryotic translation initiation factor 5A-1	323.31	12	34.5	9703300000	10199000000	8558300000	3278000000	121	141	98	56
P63244	GNB2L1	Receptor of activated protein C kinase 1	323.31	7	70.8	13120000000	10492000000	8864100000	7860500000	169	136	123	114
P63261	ACTG1	Actin, cytoplasmic 2	323.31	3	65.8	166310000000	168020000000	117400000000	118230000000	368	423	318	280
P63272	SUPT4H1	Transcription elongation factor SPT4	1.6459	7	36.5	0	0	0	0	1	0	0	1
P63279	UBE2I	SUMO-conjugating enzyme UBC9	94.797	1	3.4	782270000	687850000	695280000	927780000	28	15	11	31
P63313	TMSB10	Thymosin beta-10	178.12	2	23.8	1913600000	1401400000	676160000	483280000	16	19	13	6
P67775	PPP2CA	Serine/threonine-protein phosphatase 2A catalytic subunit alpha isoform	245.45	7	36.1	1402400000	1508600000	2247900000	2276200000	48	51	52	70
P67809	YBX1	Nuclease-sensitive element-binding protein 1	323.31	7	51.5	3394700000	3752300000	3423100000	2656300000	87	94	62	76
P67812	SEC11A	Signal peptidase complex catalytic subunit SEC11A	30.425	12	82.2	0	0	0	48771000	11	4	3	7
P67870	CSNK2B	Casein kinase II subunit beta	73.6	17	71.6	432470000	503130000	739200000	697470000	7	14	15	29
P67936	TPM4	Tropomyosin alpha-4 chain	323.31	20	74.4	8936900000	10853000000	5262700000	2497000000	139	165	91	41
P68032	ACTC1	Actin, alpha cardiac muscle 1	258.36	13	40.1	1421800000	1827900000	382370000	271330000	20	18	8	6
P68036	UBE2L3	Ubiquitin-conjugating enzyme E2L 3	164.87	6	51.9	1160700000	2042300000	1255800000	1195100000	47	74	36	33
P68104	EEF1A1	Elongation factor 1-alpha 1	323.31	1	10.1	58292000000	64413000000	41745000000	65172000000	563	630	450	593
P68363	TUBA1B	Tubulin alpha-1B chain	323.31	7	24.2	47317000000	58830000000	76904000000	78699000000	346	401	411	477
P68366	TUBA4A	Tubulin alpha-4A chain	221.4	6	65.2	1465200000	1439700000	1516800000	834150000	37	41	33	24
P68371	TUBB4B	Tubulin beta-4B chain	323.31	20	44.6	35768000000	40527000000	76174000000	60413000000	318	356	652	524
P68400	CSNK2A1	Casein kinase II subunit alpha	148.04	5	60.9	1260000000	1314800000	1256000000	1822400000	55	45	39	60
P68402	PAFAH1B2	Platelet-activating factor acetylhydrolase IB subunit beta	156.47	4	67.8	644340000	678640000	1037800000	875150000	24	26	32	21
P68431	HIST1H3J	Histone cluster 1 H3 family member j	130.96	24	74.6	0	0	0	0	0	0	0	0
P69849	NOMO3	Nodal modulator 3	97.722	2	40.7	0	362900000	383880000	350490000	8	19	32	44
P69905	HBA2	Hemoglobin subunit alpha 2	5.2399	10	41.7	0	0	0	298650000	0	0	0	11
P78310	CXADR	Coxsackievirus and adenovirus receptor	124.12	10	45.6	0	0	512250000	1178100000	0	0	20	38
P78318	IGBP1	Immunoglobulin-binding protein 1	2.339	9	54.4	62478000	0	0	0	3	0	1	0
P78330	PSPH	Phosphoserine phosphatase	23.377	8	25.1	125380000	0	145420000	325060000	7	7	3	21
P78344	EIF4G2	Eukaryotic translation initiation factor 4 gamma 2	160.16	7	64.4	629320000	570630000	444540000	459600000	67	32	30	58
P78346	RPP30	Ribonuclease P protein subunit p30	1.9866	4	42.4	0	0	15424000	0	1	3	0	0
P78347	GTF2I	General transcription factor II-I	261.7	5	79.8	809610000	1041200000	1041000000	1778700000	36	70	47	111
P78362	SRPK2	SRSF protein kinase 2	3.8496	2	17.1	0	0	0	37044000	0	0	2	5
P78371	CCT2	T-complex protein 1 subunit beta	323.31	11	79.4	8112800000	6498000000	6960800000	5300400000	189	160	170	147
P78406	RAE1	mRNA export factor	21.836	8	21	147170000	176180000	177990000	166430000	11	8	8	27
P78417	GSTO1	Glutathione S-transferase omega-1	106.19	9	41.6	1840700000	1922600000	381810000	909970000	54	59	8	37
P78527	PRKDC	DNA-dependent protein kinase catalytic subunit	323.31	20	43.4	9587800000	3006400000	12780000000	22659000000	445	118	492	829
P78540	ARG2	Arginase-2, mitochondrial	67.767	4	37.8	0	0	463050000	0	0	0	26	0
P78559	MAP1A	Microtubule-associated protein 1A	2.7396	3	28.3	0	0	0	4083300	0	0	1	1
P80217	IFI35	Interferon-induced 35 kDa protein	12.265	5	43	0	57516000	0	0	0	8	0	1
P80297	MT1X	Metallothionein-1X	17.471	5	35	0	0	0	0	0	0	0	0
P80303	NUCB2	Nucleobindin-2	47.689	4	33.7	0	0	1057700000	1122900000	3	8	31	43
P80723	BASP1	Brain abundant membrane attached signal protein 1	323.31	3	68.2	5180400000	5078200000	7814100000	1375600000	96	90	93	44
P81877	SSBP2	Single stranded DNA binding protein 2	2.3263	4	15.2	0	0	0	0	0	0	0	1
P82650	MRPS22	Mitochondrial ribosomal protein S22	38.941	7	29.6	126530000	116920000	201400000	121840000	14	8	19	10
P82663	MRPS25	Mitochondrial ribosomal protein S25	6.5344	4	25.3	0	0	0	27599000	0	3	1	7
P82673	MRPS35	Mitochondrial ribosomal protein S35	23.876	7	94.5	0	93584000	184970000	132870000	6	3	20	10
P82675	MRPS5	Mitochondrial ribosomal protein S5	11.043	28	65.9	0	0	124830000	0	4	0	5	2
P82909	MRPS36	Mitochondrial ribosomal protein S36	36.485	14	76.9	150190000	137890000	237610000	395090000	4	1	16	24
P82912	MRPS11	Mitochondrial ribosomal protein S11	2.0295	1	11.3	0	0	0	0	0	0	2	0
P82914	MRPS15	Mitochondrial ribosomal protein S15	1.7089	4	40	0	0	0	0	0	0	2	2
P82921	MRPS21	Mitochondrial ribosomal protein S21	7.3407	15	71.1	0	0	96778000	0	4	1	8	3
P82930	MRPS34	28S ribosomal protein S34, mitochondrial	22.31	5	73.9	190490000	145210000	259970000	183760000	17	9	15	18
P82932	MRPS6	Mitochondrial ribosomal protein S6	8.5981	7	69.4	0	0	90298000	0	0	0	9	9
P82933	MRPS9	Mitochondrial ribosomal protein S9	106.75	20	57	169890000	85283000	333150000	344250000	11	14	25	28
P82970	HMGN5	High mobility group nucleosome-binding domain-containing protein 5	1.7527	19	65.8	0	0	48243000	0	0	0	2	0
P82979	SARNP	SAP domain-containing ribonucleoprotein	118.62	12	58.7	281860000	321640000	723120000	774820000	18	18	18	24
P83111	LACTB	Serine beta-lactamase-like protein LACTB, mitochondrial	5.4989	11	73.1	0	15949000	0	0	7	1	0	0
P83731	RPL24	Ribosomal protein L24	95.033	11	57.5	2594400000	2320800000	1129300000	1836200000	42	41	12	40
P83876	TXNL4A	Thioredoxin-like protein 4A	3.5393	1	5.9	0	0	0	29447000	1	1	0	6
P83916	CBX1	Chromobox protein homolog 1	85.125	3	21.3	286650000	479600000	1140900000	798070000	4	12	30	29
P84085	ARF5	ADP-ribosylation factor 5	261.4	21	77.6	1482600000	1924700000	963220000	1435000000	36	85	33	74
P84090	ERH	Enhancer of rudimentary homolog	323.31	12	70.2	909470000	966480000	1368000000	2245100000	22	16	20	19
P84095	RHOG	Rho-related GTP-binding protein RhoG	20.486	6	43.4	0	0	0	109570000	5	1	1	11
P84098	RPL19	Ribosomal protein L19	116.76	12	46.1	2650700000	2370400000	2030400000	1784400000	53	39	35	26
P84101	SERF2	Small EDRK-rich factor 2	2.5811	3	46.4	89695000	88957000	0	72512000	3	0	0	0
P84103	SRSF3	Serine/arginine-rich splicing factor 3	112.99	13	50.3	1517600000	1422800000	3078200000	3989000000	32	25	33	31
P84243	H3F3B	H3 histone, family 3B (H3.3B)	323.31	16	65.8	45796000000	32852000000	98589000000	96605000000	84	78	153	116
P85037	FOXK1	Forkhead box protein K1	3.2248	3	52.2	0	7540700	0	0	0	4	1	1
P98175	RBM10	RNA-binding protein 10	41.689	3	33.7	0	0	241660000	298170000	3	0	12	29
P98179	RBM3	RNA-binding protein 3	186.52	3	40.2	1072400000	1194700000	434280000	552610000	32	36	9	18
P99999	CYCS	Cytochrome c	294.79	4	54.6	1914300000	3725800000	3539300000	2491900000	38	64	55	45
Q00013	MPP1	55 kDa erythrocyte membrane protein	220.45	10	67.8	0	0	0	635390000	0	5	0	44
Q00059	TFAM	Transcription factor A, mitochondrial	33.752	6	54.8	466010000	455730000	682600000	665590000	16	35	31	36
Q00169	PITPNA	Phosphatidylinositol transfer protein alpha isoform	4.8376	8	88.6	0	44567000	0	0	0	9	1	1
Q00325	SLC25A3	Phosphate carrier protein, mitochondrial	186.05	7	60.6	2476700000	1552400000	2751800000	7184900000	53	43	37	78
Q00341	HDLBP	Vigilin	120.99	18	59.4	989270000	921510000	834810000	634540000	56	64	39	41
Q00403	GTF2B	Transcription initiation factor IIB	2.8266	4	29.6	0	0	82822000	0	0	0	4	1
Q00534	CDK6	Cyclin-dependent kinase 6	2.5478	23	60.2	0	0	0	18976000	1	0	0	5
Q00535	CDK5	Cyclin-dependent-like kinase 5	12.395	13	31.4	0	0	268370000	154380000	0	7	16	8
Q00577	PURA	Transcriptional activator protein Pur-alpha	25.778	6	40.1	0	0	0	56109000	1	1	1	4
Q00587	CDC42EP1	Cdc42 effector protein 1	2.6012	12	63.5	0	15375000	0	0	0	5	0	0
Q00610	CLTC	Clathrin heavy chain 1	323.31	3	31.1	20151000000	13699000000	17571000000	23663000000	553	438	406	532
Q00653	NFKB2	Nuclear factor NF-kappa-B p100 subunit	9.0276	10	41.7	0	11232000	0	0	1	10	0	0
Q00688	FKBP3	Peptidyl-prolyl cis-trans isomerase FKBP3	226.4	12	35.7	1634500000	1246300000	2463600000	1781800000	62	37	58	39
Q00765	REEP5	Receptor expression-enhancing protein 5	22.589	4	25.7	177470000	250310000	0	328110000	4	12	1	14
Q00796	SORD	Sorbitol dehydrogenase	39.627	13	65	377360000	318630000	530570000	358200000	15	12	23	14
Q00839	HNRNPU	Heterogeneous nuclear ribonucleoprotein U	323.31	5	68.3	14503000000	11628000000	27976000000	35609000000	247	222	310	402
Q01082	SPTBN1	Spectrin beta chain, non-erythrocytic 1	323.31	17	62.5	7505400000	8442600000	3486900000	4786900000	383	428	84	235
Q01085	TIAL1	Nucleolysin TIAR	34.312	11	60	250260000	266540000	330470000	297070000	21	15	9	16
Q01101	INSM1	Insulinoma-associated protein 1	2.2463	3	57.1	0	0	0	51438000	0	0	0	3
Q01105	SET	Protein SET	323.31	4	40.7	4053400000	4814700000	2919500000	6093200000	57	88	24	76
Q01130	SRSF2	Serine/arginine-rich splicing factor 2	141.76	6	36.1	808010000	872820000	1305500000	1446200000	17	19	15	18
Q01167	FOXK2	Forkhead box protein K2	14.519	6	36.8	0	0	19342000	0	0	0	2	1
Q01415	GALK2	N-acetylgalactosamine kinase	7.9649	4	44.3	0	0	0	74383000	0	0	0	6
Q01469	FABP5	Fatty acid-binding protein, epidermal	323.31	3	36.2	3083900000	4283800000	1399400000	2263500000	77	85	33	46
Q01484	ANK2	Ankyrin-2	10.238	3	20.3	0	0	0	127890000	1	0	0	13
Q01518	CAP1	Adenylyl cyclase-associated protein 1	323.31	9	58.2	3648900000	3417400000	3041200000	1448600000	104	104	65	46
Q01581	HMGCS1	Hydroxymethylglutaryl-CoA synthase, cytoplasmic	78.58	3	74.6	517280000	790510000	476210000	778840000	29	49	26	57
Q01650	SLC7A5	Large neutral amino acids transporter small subunit 1	27.111	4	30.6	1497200000	453100000	0	329940000	33	13	0	8
Q01658	DR1	Protein Dr1	55.166	7	57.9	0	0	421600000	78274000	2	0	21	3
Q01780	EXOSC10	Exosome component 10	12.594	8	59.1	0	0	0	37042000	7	2	7	5
Q01813	PFKP	ATP-dependent 6-phosphofructokinase, platelet type	323.31	1	19.6	8032200000	4100700000	2210400000	1334700000	217	133	58	30
Q01844	EWSR1	RNA-binding protein EWS	173.85	8	52.8	810210000	769960000	1272800000	1450700000	32	31	28	41
Q01968	OCRL	Inositol polyphosphate 5-phosphatase OCRL-1	3.1648	10	41	0	0	24467000	0	0	1	4	0
Q01970	PLCB3	1-phosphatidylinositol 4,5-bisphosphate phosphodiesterase beta-3	27.724	11	54.1	0	0	163080000	125130000	0	1	9	2
Q02083	NAAA	N-acylethanolamine-hydrolyzing acid amidase	5.0713	9	42.1	0	0	0	36932000	0	0	0	5
Q02127	DHODH	Dihydroorotate dehydrogenase (quinone), mitochondrial	8.7339	15	55.3	0	0	28111000	0	0	0	2	0
Q02218	OGDH	2-oxoglutarate dehydrogenase, mitochondrial	323.31	11	71.5	235030000	1328300000	2872000000	2615400000	5	46	127	135
Q02241	KIF23	Kinesin-like protein KIF23	4.4693	6	73.1	0	0	0	37256000	2	1	0	3
Q02252	ALDH6A1	Methylmalonate-semialdehyde dehydrogenase [acylating], mitochondrial	58.855	12	56.4	0	0	1078300000	203160000	0	0	57	3
Q02318	CYP27A1	Sterol 26-hydroxylase, mitochondrial	1.6909	11	65.9	0	0	0	11683000	0	0	0	5
Q02338	BDH1	D-beta-hydroxybutyrate dehydrogenase, mitochondrial	51.776	9	35.8	0	0	92490000	110620000	0	0	4	12
Q02539	HIST1H1A	Histone H1.1	6.3129	5	45.3	0	100320000	0	0	0	5	0	0
Q02543	RPL18A	Ribosomal protein L18a	190.81	22	44.9	3857000000	3274300000	2707000000	3162000000	95	80	46	46
Q02750	MAP2K1	Dual specificity mitogen-activated protein kinase kinase 1	87.878	1	34.5	444390000	650880000	587810000	793770000	15	17	25	58
Q02790	FKBP4	Peptidyl-prolyl cis-trans isomerase FKBP4	323.31	14	48.2	4747200000	3938200000	5846400000	3429900000	176	129	128	79
Q02809	PLOD1	Procollagen-lysine,2-oxoglutarate 5-dioxygenase 1	77.566	12	52.8	40963000	0	780810000	77623000	4	6	48	3
Q02818	NUCB1	Nucleobindin-1	55.754	4	45.3	312950000	281770000	711820000	408020000	31	5	48	19
Q02878	RPL6	60S ribosomal protein L6	323.31	20	75.9	6490600000	5519100000	6355400000	4769000000	122	103	92	95
Q02880	TOP2B	DNA topoisomerase 2-beta	43.92	12	42.7	225520000	86595000	619540000	523720000	21	8	37	39
Q02952	AKAP12	A-kinase anchor protein 12	28.181	3	34.7	152260000	0	0	0	17	0	0	0
Q02978	SLC25A11	Mitochondrial 2-oxoglutarate/malate carrier protein	165.48	3	64	589570000	440300000	750490000	734890000	33	28	34	49
Q03001	DST	Dystonin	108.09	4	58.4	0	70647000	48642000	945540000	1	0	5	94
Q03135	CAV1	Caveolin-1	75.606	6	52.9	923190000	1318000000	0	0	36	26	0	0
Q03169	TNFAIP2	Tumor necrosis factor alpha-induced protein 2	66.651	11	74.2	286860000	497680000	0	0	21	46	0	0
Q03252	LMNB2	Lamin-B2	256.63	5	79.4	809150000	1694100000	2504600000	3322800000	34	60	84	112
Q03701	CEBPZ	CCAAT/enhancer-binding protein zeta	31.033	6	63.9	154940000	101450000	181920000	139160000	10	5	15	25
Q04206	RELA	Transcription factor p65	1.9533	19	88.3	0	0	0	13786000	0	0	2	3
Q04323	UBXN1	UBX domain-containing protein 1	53.507	23	90.9	186400000	153640000	306440000	299330000	3	4	10	13
Q04446	GBE1	1,4-alpha-glucan-branching enzyme	36.447	2	87.2	74383000	0	0	0	14	5	0	0
Q04637	EIF4G1	Eukaryotic translation initiation factor 4 gamma 1	323.31	1	13.7	1742100000	2475000000	1954600000	1349400000	112	154	75	69
Q04726	TLE3	Transducin-like enhancer protein 3	4.4511	9	58.9	0	0	0	39445000	0	0	0	7
Q04760	GLO1	Lactoylglutathione lyase	68.113	3	63.6	822990000	1245400000	2814100000	191190000	33	51	44	7
Q04826	HLA-B	HLA class I histocompatibility antigen, B-7 alpha chain	6.7565	10	43.7	0	0	0	0	0	4	0	0
Q04828	AKR1C1	Aldo-keto reductase family 1 member C1	323.31	8	52.8	36276000000	0	303100000	0	283	0	0	0
Q04837	SSBP1	Single-stranded DNA-binding protein, mitochondrial	323.31	3	11.2	1337800000	2853000000	2257200000	3584400000	35	61	45	71
Q04917	YWHAH	14-3-3 protein eta	246.84	7	45.1	854350000	2233000000	763910000	2072100000	23	74	18	47
Q04941	PLP2	Proteolipid protein 2	8.2033	13	69.4	0	0	0	316230000	4	6	4	6
Q05048	CSTF1	Cleavage stimulation factor subunit 1	48.924	0	50.4	0	0	150410000	135160000	2	5	11	6
Q05084	ICA1	Islet cell autoantigen 1	2.747	9	64.9	0	0	0	7124700	0	0	0	5
Q05086	UBE3A	Ubiquitin-protein ligase E3A	29.307	17	74	0	0	0	262180000	0	0	1	28
Q05193	DNM1	Dynamin-1	70.865	1	50.1	0	0	65130000	0	13	0	9	1
Q05209	PTPN12	Tyrosine-protein phosphatase non-receptor type 12	7.5517	0	80.9	0	0	0	13196000	1	4	0	5
Q05397	PTK2	Focal adhesion kinase 1	1.6794	6	67.9	0	0	0	52104000	3	0	1	1
Q05519	SRSF11	Serine/arginine-rich splicing factor 11	47.435	1	75.7	0	0	565720000	453220000	6	5	29	17
Q05639	EEF1A2	Elongation factor 1-alpha 2	323.31	16	56	1686800000	12365000000	6713100000	2127800000	32	170	86	55
Q05655	PRKCD	Protein kinase C delta type	9.2861	5	50.2	0	23629000	0	0	0	6	0	0
Q05682	CALD1	Caldesmon	107.73	1	49.3	152250000	253920000	244330000	0	11	27	8	0
Q05D32	CTDSPL2	CTD small phosphatase-like protein 2	3.6308	2	33.6	0	0	0	249170000	0	0	0	4
Q06124	PTPN11	Tyrosine-protein phosphatase non-receptor type 11	65.265	2	43	0	149050000	484630000	539250000	5	2	39	25
Q06136	KDSR	3-ketodihydrosphingosine reductase	5.3513	12	45.8	0	0	0	18318000	0	0	0	4
Q06203	PPAT	Amidophosphoribosyltransferase	51.049	3	14.2	0	0	377950000	157110000	1	0	15	11
Q06210	GFPT1	Glutamine--fructose-6-phosphate aminotransferase [isomerizing] 1	129.84	6	39.6	536860000	534240000	773270000	434760000	44	47	62	45
Q06265	EXOSC9	Exosome complex component RRP45	2.9949	27	37.7	0	41447000	39515000	0	3	4	3	2
Q06323	PSME1	Proteasome activator complex subunit 1	78.736	2	9.3	1486300000	2273200000	1420400000	278070000	50	80	33	5
Q06330	RBPJ	Recombining binding protein suppressor of hairless	5.0851	33	44.3	0	0	0	31718000	0	0	0	5
Q06587	RING1	E3 ubiquitin-protein ligase RING1	14.988	2	6.7	0	0	311440000	0	3	1	10	11
Q06787	FMR1	Synaptic functional regulator FMR1	85.576	37	81.9	0	0	362180000	410740000	2	0	16	31
Q06830	PRDX1	Peroxiredoxin-1	323.31	10	39.1	36070000000	15525000000	16852000000	18515000000	250	165	139	131
Q07020	RPL18	60S ribosomal protein L18	163.13	15	61.8	6186700000	4946800000	6113900000	5266200000	53	59	50	62
Q07021	C1QBP	Complement component 1 Q subcomponent-binding protein, mitochondrial	137.07	194	51.3	1662100000	1212000000	2783400000	1778300000	56	43	49	39
Q07065	CKAP4	Cytoskeleton-associated protein 4	323.31	9	46	1651900000	497230000	5134200000	6337300000	73	12	117	154
Q07157	TJP1	Tight junction protein ZO-1	124.87	2	2	1033500000	762880000	0	815580000	53	25	0	34
Q07666	KHDRBS1	KH domain-containing, RNA-binding, signal transduction-associated protein 1	137.02	4	16.8	952300000	730570000	2329000000	2258200000	31	29	49	56
Q07812	BAX	Apoptosis regulator BAX	107.96	1	54.1	178350000	141730000	248140000	258300000	19	14	11	20
Q07817	BCL2L1	Bcl-2-like protein 1	1.861	13	45.7	0	0	0	13656000	1	0	1	3
Q07866	KLC1	Kinesin light chain 1	120.04	15	88.1	340310000	207950000	826050000	1058700000	9	10	26	54
Q07955	SRSF1	Serine/arginine-rich splicing factor 1	260.75	1	4.4	2727500000	2384200000	4337100000	4935900000	77	54	92	119
Q07960	ARHGAP1	Rho GTPase-activating protein 1	82.596	13	46.4	610760000	608830000	426290000	348160000	28	31	21	15
Q07973	CYP24A1	1,25-dihydroxyvitamin D(3) 24-hydroxylase, mitochondrial	7.7782	6	35.8	13883000	0	0	0	7	0	0	0
Q08170	SRSF4	Serine/arginine-rich splicing factor 4	12.863	7	32.5	0	0	0	39265000	0	0	3	5
Q08209	PPP3CA	Serine/threonine-protein phosphatase 2B catalytic subunit alpha isoform	54.338	3	10	155820000	97924000	1071900000	245980000	6	4	43	22
Q08211	DHX9	ATP-dependent RNA helicase A	323.31	5	68.9	8073100000	5876400000	12269000000	16695000000	251	206	244	335
Q08257	CRYZ	Quinone oxidoreductase	66.718	2	23.7	636100000	0	881600000	355130000	51	0	26	10
Q08379	GOLGA2	Golgin subfamily A member 2	29.312	3	11.3	0	0	340220000	756190000	0	1	4	18
Q08380	LGALS3BP	Galectin-3-binding protein	63.246	2	29.9	0	0	0	118130000	0	12	6	4
Q08431	MFGE8	Lactadherin	2.6086	7	37.6	0	0	33193000	0	0	0	3	0
Q08499	PDE4D	cAMP-specific 3',5'-cyclic phosphodiesterase 4D	2.5928	3	36	0	0	0	86267000	0	0	0	1
Q08623	HDHD1	Pseudouridine-5'-phosphatase	4.6434	12	41.2	0	13911000	0	0	0	3	0	0
Q08629	SPOCK1	Testican-1	4.2964	1	5.3	0	0	0	43597000	0	0	0	8
Q08722	CD47	Leukocyte surface antigen CD47	12.746	8	43.3	0	433930000	0	1134700000	0	13	0	25
Q08752	PPID	Peptidyl-prolyl cis-trans isomerase D	7.7551	5	13.5	0	0	99317000	0	3	2	2	0
Q08945	SSRP1	FACT complex subunit SSRP1	323.31	6	31.8	1722400000	1415500000	3614700000	3510200000	62	65	105	125
Q08AF3	SLFN5	Schlafen family member 5	11.983	2	21.8	0	25526000	0	0	0	5	0	0
Q08AM6	VAC14	Protein VAC14 homolog	4.0955	7	47.6	0	0	130360000	0	1	6	0	2
Q08J23	NSUN2	tRNA (cytosine(34)-C(5))-methyltransferase	181.6	7	81.1	671040000	835830000	1600100000	590650000	43	71	81	34
Q09028	RBBP4	Histone-binding protein RBBP4	323.31	7	53.8	796160000	1012100000	1895000000	2474100000	19	17	32	69
Q09161	NCBP1	Nuclear cap-binding protein subunit 1	117.62	6	51.8	362230000	220830000	296420000	1093700000	12	16	9	73
Q09666	AHNAK	Neuroblast differentiation-associated protein AHNAK	323.31	6	26	13864000000	10349000000	0	64854000	597	403	0	0
Q0VDF9	HSPA14	Heat shock 70 kDa protein 14	50.173	2	32.2	0	0	0	48878000	5	2	3	5
Q10471	GALNT2	Polypeptide N-acetylgalactosaminyltransferase 2	81.166	4	29.3	383750000	0	0	0	33	4	3	0
Q10472	GALNT1	Polypeptide N-acetylgalactosaminyltransferase 1	5.5896	1	49.3	0	0	0	0	0	0	0	3
Q10567	AP1B1	AP-1 complex subunit beta-1	21.542	3	4	0	236190000	134300000	169220000	0	23	9	21
Q10570	CPSF1	Cleavage and polyadenylation specificity factor subunit 1	13.527	9	12.8	0	0	50309000	57070000	1	0	2	12
Q10713	PMPCA	Mitochondrial-processing peptidase subunit alpha	174.04	4	49	0	844730000	629320000	532620000	2	24	33	53
Q12756	KIF1A	Kinesin-like protein KIF1A	13.953	11	61	0	0	0	93679000	0	0	3	18
Q12765	SCRN1	Secernin-1	85.391	11	38	284430000	468490000	1157700000	1016700000	10	13	46	38
Q12769	NUP160	Nuclear pore complex protein Nup160	81.537	8	32.9	0	0	164680000	181980000	14	3	8	33
Q12788	TBL3	Transducin beta-like protein 3	35.5	5	24.8	140450000	191670000	309220000	179930000	6	21	23	13
Q12789	GTF3C1	General transcription factor 3C polypeptide 1	7.6584	16	48.9	49877000	0	0	0	4	1	0	2
Q12792	TWF1	Twinfilin-1	112.46	27	27.8	406960000	882080000	307230000	304390000	16	56	4	7
Q12797	ASPH	Aspartyl/asparaginyl beta-hydroxylase	323.31	2	11.7	1801500000	382750000	403720000	277220000	105	16	13	16
Q12800	TFCP2	Alpha-globin transcription factor CP2	8.2911	3	14.4	0	35021000	0	0	1	6	0	3
Q12824	SMARCB1	SWI/SNF-related matrix-associated actin-dependent regulator of chromatin subfamily B member 1	34.574	8	36.6	0	0	171100000	216680000	0	0	10	19
Q12849	GRSF1	G-rich sequence factor 1	97.673	3	18	512690000	588150000	687060000	342510000	29	29	43	21
Q12860	CNTN1	Contactin-1	71.254	2	3.8	63502000	0	91572000	1138500000	3	0	8	62
Q12874	SF3A3	Splicing factor 3A subunit 3	190.42	76	68.6	542260000	587130000	921240000	772590000	33	40	39	52
Q12888	TP53BP1	TP53-binding protein 1	24.826	6	9.8	0	0	159780000	0	0	1	10	2
Q12899	TRIM26	Tripartite motif-containing protein 26	4.3725	12	55.4	0	0	0	27841000	0	0	0	3
Q12904	AIMP1	Aminoacyl tRNA synthase complex-interacting multifunctional protein 1	86.823	6	21.2	726360000	840340000	784890000	770930000	42	52	29	31
Q12905	ILF2	Interleukin enhancer-binding factor 2	323.31	13	50.1	2205500000	1890700000	2721600000	3703600000	86	65	92	116
Q12906	ILF3	Interleukin enhancer-binding factor 3	323.31	48	56.7	3726200000	3679500000	7550300000	8192100000	130	127	145	197
Q12907	LMAN2	Vesicular integral-membrane protein VIP36	98.855	91	58.5	299000000	0	316210000	724540000	6	7	5	31
Q12926	ELAVL2	ELAV-like protein 2	323.31	6	28.8	0	0	1384700000	4110600000	0	0	29	87
Q12931	TRAP1	Heat shock protein 75 kDa, mitochondrial	323.31	3	9.4	2513300000	2821100000	4304700000	5322300000	94	99	102	158
Q12959	DLG1	Disks large homolog 1	5.8319	11	46.9	0	0	0	22832000	0	2	1	3
Q12962	TAF10	Transcription initiation factor TFIID subunit 10	84.071	3	25.3	0	0	18058000	0	0	0	0	0
Q12965	MYO1E	Unconventional myosin-Ie	102.4	1	4.4	251090000	186720000	0	363340000	16	19	0	45
Q12972	PPP1R8	Nuclear inhibitor of protein phosphatase 1	3.0509	4	15.3	0	0	59444000	0	1	0	4	2
Q12996	CSTF3	Cleavage stimulation factor subunit 3	20.97	15	77	270430000	0	257950000	264980000	4	3	5	14
Q13011	ECH1	Delta(3,5)-Delta(2,4)-dienoyl-CoA isomerase, mitochondrial	323.31	8	3.4	2385200000	0	5192100000	1753300000	61	0	102	53
Q13043	STK4	Serine/threonine-protein kinase 4	14.945	23	59.6	0	0	90885000	0	0	0	13	0
Q13045	FLII	Protein flightless-1 homolog	108.83	16	44.6	630200000	759950000	382070000	245190000	31	36	10	3
Q13057	COASY	Bifunctional coenzyme A synthase	136.02	5	9.9	184160000	247400000	0	714630000	16	14	5	57
Q9UEU5	GAGE2D	G antigen 2D	105.71	4	35.2	0	0	1125800000	0	0	0	20	0
Q13084	MRPL28	Mitochondrial ribosomal protein L28	35.89	9	14.6	0	0	215910000	130480000	5	2	16	8
Q13085	ACACA	Acetyl-CoA carboxylase 1	14.607	35	54.7	384810000	226550000	0	0	14	5	0	6
Q13098	GPS1	COP9 signalosome complex subunit 1	25.464	7	16	132680000	195830000	247560000	171340000	16	20	5	6
Q13103	SPP2	Secreted phosphoprotein 24	3.1908	3	5	0	0	0	87463000	0	0	0	6
Q13111	CHAF1A	Chromatin assembly factor 1 subunit A	36.901	6	10	0	0	90272000	133030000	0	0	6	9
Q13112	CHAF1B	Chromatin assembly factor 1 subunit B	32.423	1	4.7	0	0	78745000	84566000	0	0	4	12
Q13123	IK	Protein Red	10.528	1	4.6	88378000	0	103860000	111160000	6	6	4	10
Q13126	MTAP	S-methyl-5'-thioadenosine phosphorylase	106.02	42	56.5	0	707650000	1319300000	817010000	0	39	46	43
Q13131	PRKAA1	5'-AMP-activated protein kinase catalytic subunit alpha-1	4.1757	4	5.2	0	0	0	19537000	2	0	2	1
Q13144	EIF2B5	Translation initiation factor eIF-2B subunit epsilon	12.986	15	44.3	0	0	274850000	229170000	0	6	5	11
Q13148	TARDBP	TAR DNA-binding protein 43	323.31	2	6	1159100000	979230000	2108700000	2153700000	53	41	59	63
Q13151	HNRNPA0	Heterogeneous nuclear ribonucleoprotein A0	323.31	3	14.3	1905800000	1751500000	3803700000	5024300000	53	43	90	108
Q13153	PAK1	Serine/threonine-protein kinase PAK 1	9.9565	2	26.5	0	0	132630000	0	0	0	11	0
Q13155	AIMP2	Aminoacyl tRNA synthase complex-interacting multifunctional protein 2	83.758	13	48.9	503070000	731500000	442340000	597180000	22	38	16	31
Q13158	FADD	FAS-associated death domain protein	87.256	9	41.7	0	133180000	0	0	4	8	0	1
Q13162	PRDX4	Peroxiredoxin-4	278.3	30	74.1	2377400000	1968100000	4408500000	4312200000	80	63	81	90
Q13177	PAK2	Serine/threonine-protein kinase PAK 2	200.62	14	27	145460000	1805100000	1728400000	993490000	8	102	55	45
Q13185	CBX3	Chromobox protein homolog 3	323.31	20	56.8	2142700000	4197600000	3355400000	4376000000	34	75	51	67
Q13200	PSMD2	26S proteasome non-ATPase regulatory subunit 2	323.31	18	46.5	2490600000	4079500000	1935600000	1852300000	108	196	53	71
Q13217	DNAJC3	DnaJ homolog subfamily C member 3	176.27	20	25.5	0	0	0	762480000	1	1	0	40
Q13228	SELENBP1	Selenium-binding protein 1	10.614	8	8.1	0	0	57302000	0	0	1	4	0
Q13242	SRSF9	Serine/arginine-rich splicing factor 9	58.526	12	41.4	479630000	273670000	981400000	2101900000	18	8	30	62
Q13243	SRSF5	Serine/arginine-rich splicing factor 5	26.524	39	8	470800000	565280000	749590000	709770000	11	14	19	20
Q13247	SRSF6	Serine/arginine-rich splicing factor 6	7.5279	7	41	377290000	416160000	385360000	545280000	10	13	12	9
Q13263	TRIM28	Transcription intermediary factor 1-beta	323.31	18	40.8	5582900000	14483000000	14657000000	12075000000	134	308	206	208
Q13268	DHRS2	Dehydrogenase/reductase SDR family member 2, mitochondrial	323.31	34	61.3	0	7222000000	0	0	0	145	0	0
Q13283	G3BP1	Ras GTPase-activating protein-binding protein 1	283.83	10	12	2900800000	3413300000	2176000000	2834700000	86	117	37	69
Q13308	PTK7	Inactive tyrosine-protein kinase 7	101.79	1	2.4	193540000	94705000	455190000	2212900000	0	0	16	94
Q13310	PABPC4	Polyadenylate-binding protein 4	75.085	7	45.5	580260000	679350000	618820000	352630000	28	34	21	11
Q13325	IFIT5	Interferon-induced protein with tetratricopeptide repeats 5	8.8557	6	15.5	0	0	0	0	0	5	0	0
Q13330	MTA1	Metastasis-associated protein MTA1	64.207	34	32.8	0	0	695980000	563120000	1	0	29	38
Q13347	EIF3I	Eukaryotic translation initiation factor 3 subunit I	323.31	1	3.4	1128400000	1921700000	1491000000	1060200000	56	84	47	57
Q13362	PPP2R5C	Serine/threonine-protein phosphatase 2A 56 kDa regulatory subunit gamma isoform	10.615	10	57.1	533900000	741990000	0	695480000	3	7	2	15
Q13363	CTBP1	C-terminal-binding protein 1	99.699	0	38.4	0	0	136790000	90274000	0	1	3	6
Q13367	AP3B2	AP-3 complex subunit beta-2	6.3592	1	69.3	0	0	27396000	0	0	0	7	1
Q13371	PDCL	Phosducin-like protein	2.1354	9	58.8	0	0	0	0	0	1	0	0
Q13404	UBE2V1	Ubiquitin-conjugating enzyme E2 variant 1	23.346	18	63	571150000	528460000	573520000	372240000	21	20	13	13
Q13405	MRPL49	Mitochondrial ribosomal protein L49	50.897	1	9.9	124980000	105450000	223990000	191350000	9	7	15	13
Q13409	DYNC1I2	Cytoplasmic dynein 1 intermediate chain 2	171.44	7	26.5	612800000	600020000	631510000	353060000	29	31	28	14
Q13416	ORC2	Origin recognition complex subunit 2	2.6613	3	6	0	0	0	18752000	1	1	1	5
Q13418	ILK	Integrin-linked protein kinase	20.026	12	19.3	196480000	0	0	240160000	24	3	0	23
Q13423	NNT	NAD(P) transhydrogenase, mitochondrial	323.31	5	19.1	0	0	5124000000	6305400000	2	2	117	165
Q13427	PPIG	Peptidyl-prolyl cis-trans isomerase G	3.8771	2	4	0	0	0	37534000	2	5	2	4
Q13428	TCOF1	Treacle protein	57.604	2	1.9	405470000	443580000	581790000	521430000	24	32	28	38
Q13435	SF3B2	Splicing factor 3B subunit 2	323.31	5	15.3	1338500000	1269100000	2010700000	1704500000	73	64	84	83
Q13442	PDAP1	28 kDa heat- and acid-stable phosphoprotein	37.877	13	72.4	576730000	885180000	434740000	412820000	28	46	13	11
Q13445	TMED1	Transmembrane emp24 domain-containing protein 1	2.9595	3	5.6	0	0	0	34600000	0	0	6	3
Q13449	LSAMP	Limbic system-associated membrane protein	3.2031	9	14.2	0	0	72278000	0	0	0	2	3
Q13451	FKBP5	Peptidyl-prolyl cis-trans isomerase FKBP5	11.111	3	6.9	0	0	2159700000	0	1	3	15	0
Q13464	ROCK1	Rho-associated protein kinase 1	1.8657	17	40.2	0	0	0	0	0	0	0	3
Q13472	TOP3A	DNA topoisomerase 3-alpha	2.8776	2	8.7	0	0	18340000	0	1	0	1	1
Q13485	SMAD4	Mothers against decapentaplegic homolog 4	42.568	7	18	0	0	285090000	490990000	1	0	10	21
Q13492	PICALM	Phosphatidylinositol-binding clathrin assembly protein	8.1607	19	46.9	0	0	21112000	0	6	7	1	4
Q13501	SQSTM1	Sequestosome-1	172.8	3	8.4	1269100000	1096200000	0	594660000	58	45	0	26
Q13505	MTX1	Metaxin-1	11.956	14	63.1	0	163820000	0	209250000	2	5	1	18
Q13509	ENSG00000258947	Tubulin beta-3 chain	323.31	2	5.4	4592600000	9245200000	2394500000	5979700000	117	155	69	94
Q13510	ASAH1	Acid ceramidase	23.448	4	20.9	132900000	188790000	385460000	0	5	11	16	3
Q13523	PRPF4B	Serine/threonine-protein kinase PRP4 homolog	19.39	6	16.8	0	0	101680000	108140000	1	0	13	15
Q13526	PIN1	Peptidyl-prolyl cis-trans isomerase NIMA-interacting 1	163.59	17	75.9	0	327210000	398080000	547680000	5	8	11	24
Q13541	EIF4EBP1	Eukaryotic translation initiation factor 4E-binding protein 1	50.543	10	43.1	0	0	146560000	0	0	0	9	1
Q13542	EIF4EBP2	Eukaryotic translation initiation factor 4E-binding protein 2	28.811	5	28.4	0	0	0	0	0	0	0	0
Q13547	HDAC1	Histone deacetylase 1	75.623	33	65.9	142970000	244200000	145560000	159860000	2	13	19	19
Q13554	CAMK2B	Calcium/calmodulin-dependent protein kinase type II subunit beta	6.8006	27	26.6	0	0	0	28468000	0	0	0	2
Q13557	CAMK2D	Calcium/calmodulin-dependent protein kinase type II subunit delta	17.174	8	25.3	136360000	142960000	289650000	189920000	0	0	15	15
Q13561	DCTN2	Dynactin subunit 2	100.28	5	35.9	467060000	692600000	625080000	405790000	30	56	20	15
Q13562	NEUROD1	Neurogenic differentiation factor 1	2.5103	2	17.2	0	0	23159000	0	0	0	4	0
Q13564	NAE1	NEDD8-activating enzyme E1 regulatory subunit	15.551	12	38.2	0	0	84142000	0	3	4	6	5
Q13573	SNW1	SNW domain-containing protein 1	80.946	16	49.2	0	158560000	306030000	272940000	7	13	15	14
Q13574	DGKZ	Diacylglycerol kinase zeta	8.8963	15	56.5	0	0	0	97814000	0	0	0	4
Q13595	TRA2A	Transformer-2 protein homolog alpha	14.303	4	9.7	85052000	67524000	87082000	326610000	8	8	3	22
Q13596	SNX1	Sorting nexin-1	25.374	2	5.1	217060000	146120000	151240000	179930000	24	7	4	15
Q13601	KRR1	KRR1 small subunit processome component homolog	10.037	9	32.1	0	0	143250000	102280000	0	0	11	7
Q13610	PWP1	Periodic tryptophan protein 1 homolog	8.2385	58	55.2	75041000	0	41094000	83178000	12	0	1	9
Q13616	CUL1	Cullin-1	15.962	13	55.6	0	116810000	0	0	5	15	2	2
Q13617	CUL2	Cullin-2	6.3066	7	8.9	0	0	35425000	0	3	1	5	0
Q13618	CUL3	Cullin-3	13.565	8	21.7	0	0	0	58224000	5	1	4	4
Q13619	CUL4A	Cullin-4A	102.46	1	3.9	0	0	23846000	631930000	7	7	1	61
Q13620	CUL4B	Cullin-4B	14.045	2	4.2	0	0	0	20020000	1	5	0	8
Q13630	TSTA3	GDP-L-fucose synthase	5.6922	3	17.5	0	63303000	36193000	0	5	13	0	1
Q13636	RAB31	Ras-related protein Rab-31	13.737	3	6.6	0	0	0	205360000	2	7	0	15
Q13642	FHL1	Four and a half LIM domains protein 1	52.861	7	16.1	0	0	1319000000	333030000	0	0	43	18
Q13685	AAMP	Angio-associated migratory cell protein	4.2466	6	21.9	0	0	20516000	0	2	4	6	0
Q13724	MOGS	Mannosyl-oligosaccharide glucosidase	72.295	25	39.9	0	0	319510000	259610000	3	8	18	23
Q13740	ALCAM	CD166 antigen	273.59	2	3	273740000	638170000	0	2828200000	10	26	0	104
Q13748	TUBA3D	Tubulin, alpha 3d	22.158	4	8.7	0	0	188600000	0	0	0	13	0
Q13751	LAMB3	Laminin subunit beta-3	39.731	30	55	0	188970000	0	0	0	16	0	0
Q13769	THOC5	THO complex subunit 5 homolog	40.849	11	65.9	0	0	86471000	316250000	1	1	1	29
Q13795	ARFRP1	ADP-ribosylation factor-related protein 1	4.3442	15	33	0	0	0	0	0	0	0	0
Q13813	SPTAN1	Spectrin alpha chain, non-erythrocytic 1	323.31	171	54.8	8092200000	9633000000	4715100000	7604300000	406	470	111	352
Q13823	GNL2	Nucleolar GTP-binding protein 2	4.2506	4	17.7	0	0	0	43875000	0	1	1	8
Q13838	DDX39B	Spliceosome RNA helicase DDX39B	231.43	9	22.1	1223900000	1047900000	2004500000	1516100000	44	42	51	61
Q13867	BLMH	Bleomycin hydrolase	41.135	2	4.5	289380000	150830000	765450000	398240000	12	2	26	15
Q13868	EXOSC2	Exosome complex component RRP4	35.111	9	26.4	0	0	136040000	0	2	6	9	3
Q13885	TUBB2A	Tubulin beta-2A chain	3.8889	9	8.5	0	0	0	145760000	0	0	2	4
Q13895	BYSL	Bystin	12.409	17	47.6	0	0	0	24391000	11	4	6	7
Q13907	IDI1	Isopentenyl-diphosphate Delta-isomerase 1	30.053	10	10.4	0	0	71860000	59840000	9	2	5	10
Q13951	CBFB	Core-binding factor subunit beta	162.32	12	35.5	0	105510000	57040000	0	0	8	0	0
Q14004	CDK13	Cyclin-dependent kinase 13	8.204	14	15.2	0	0	0	16760000	0	2	1	2
Q14008	CKAP5	Cytoskeleton-associated protein 5	182.75	15	27.8	612830000	134660000	406950000	1426300000	38	3	32	127
Q14011	CIRBP	Cold-inducible RNA-binding protein	70.124	4	3.4	0	0	598320000	502770000	0	7	14	21
Q14019	COTL1	Coactosin-like protein	266.16	12	49.1	3916200000	8589400000	0	509150000	89	126	2	15
Q14061	COX17	Cytochrome c oxidase copper chaperone	35.199	24	40.2	224770000	393320000	601270000	279370000	10	16	18	3
Q14103	HNRNPD	Heterogeneous nuclear ribonucleoprotein D0	323.31	5	15.3	5128100000	5984000000	15894000000	10540000000	111	108	147	105
[truncated: 1,972 more rows]

## Sheet: Table S2
Supplementary Table S2: Quantitative proteins among four different cell lines with at least five PSMs														NSCLC cell lines: H1975, A549 SCLC cell lines: H69, H446
Protein information						LFQ intensities of proteins in four types of cell lines				PSMs of proteins
Accession Number	Gene Name	Protein name	Score	Unique peptides	Sequence coverage [%]	A549 cells	H1975 cells	H446 cells	H69 cells	A549 cells	H1975 cells	H446 cells	H69 cells
A0AVT1	UBA6	Ubiquitin-like modifier-activating enzyme 6	57.226	0	12.7	430570000	572660000	485510000	271780000	5	50	20	8
P62308	SNRPG	Small nuclear ribonucleoprotein G	70.12	6	85.9	641770000	537820000	756290000	659480000	19	18	25	19
Q13765	NACA	Nascent polypeptide-associated complex subunit alpha, muscle-specific form	296.68	3	5.4	2356300000	2406200000	1820900000	1444200000	42	41	19	30
O00148	DDX39A	ATP-dependent RNA helicase DDX39A	323.31	1	8.1	3852900000	3494800000	6039300000	9256200000	73	84	95	142
O00151	PDLIM1	PDZ and LIM domain protein 1	323.31	23	85.5	1561700000	2363200000	711020000	314490000	64	77	33	10
O00154	ACOT7	Cytosolic acyl coenzyme A thioester hydrolase	25.839	2	80	499020000	505850000	834670000	537770000	29	20	37	25
O00159	MYO1C	Unconventional myosin-Ic	129.76	1	12.1	2395000000	698250000	376170000	196570000	82	38	7	5
O00203	AP3B1	AP-3 complex subunit beta-1	19.226	26	51.9	497220000	636310000	493370000	445340000	11	29	13	17
O00217	NDUFS8	NADH dehydrogenase [ubiquinone] iron-sulfur protein 8, mitochondrial	71.487	13	32.7	198730000	243530000	325640000	680990000	9	18	22	36
O00231	PSMD11	26S proteasome non-ATPase regulatory subunit 11	119.54	2	17.7	1861100000	1708500000	1573500000	1397500000	58	59	27	35
O00232	PSMD12	26S proteasome non-ATPase regulatory subunit 12	167.57	6	17.6	1465600000	1501900000	1246300000	1204900000	68	67	35	58
O00244	ATOX1	Copper transport protein ATOX1	45.949	3	17.9	412080000	707870000	450970000	222220000	21	25	16	5
O00264	PGRMC1	Membrane-associated progesterone receptor component 1	240.52	11	40.8	673370000	336600000	1024100000	1383400000	30	18	40	59
O00299	CLIC1	Chloride intracellular channel protein 1	323.31	1	6.4	4670700000	7542700000	3792500000	3367100000	97	154	78	65
O00303	EIF3F	Eukaryotic translation initiation factor 3 subunit F	114.86	15	30.3	1491800000	1207800000	707380000	904100000	56	54	25	28
O00410	IPO5	Importin-5	323.31	4	4.4	2427300000	2067400000	1500600000	3244300000	138	107	75	197
O00425	IGF2BP3	Insulin-like growth factor 2 mRNA-binding protein 3	113.97	5	11.5	582110000	602870000	765440000	699480000	19	43	32	43
O00429	DNM1L	Dynamin-1-like protein	144.68	18	15.9	376980000	158850000	603330000	424880000	26	13	75	50
O00483	NDUFA4	Cytochrome c oxidase subunit NDUFA4	9.0823	6	27.8	367260000	309830000	653630000	727280000	16	6	15	13
O00487	PSMD14	26S proteasome non-ATPase regulatory subunit 14	114.77	9	43.1	835180000	720210000	857170000	598030000	39	42	18	31
O00541	PES1	Pescadillo homolog	54.545	15	40.7	457860000	555980000	304780000	305090000	28	50	7	22
O00567	NOP56	Nucleolar protein 56	241.43	1	19.9	1574200000	1832800000	2726200000	2264900000	77	83	102	96
O00571	DDX3X	ATP-dependent RNA helicase DDX3X	307.06	12	19.9	4774600000	3056500000	3409700000	4171100000	141	111	96	120
O00629	KPNA4	Importin subunit alpha-3	176.61	1	3.8	447890000	665160000	457050000	187920000	26	54	20	5
O00743	PPP6C	Protein phosphatase 6 catalytic subunit	88.032	1	0	212210000	252820000	197180000	280180000	22	42	8	31
O00764	PDXK	Pyridoxal kinase	207.21	1	0	1368700000	755020000	203470000	579550000	72	32	9	42
O14561	NDUFAB1	Acyl carrier protein, mitochondrial	27.96	1	0	544350000	992150000	1482400000	1558700000	15	16	33	40
O14579	COPE	Coatomer subunit epsilon	323.31	1	0	615830000	817390000	499550000	549920000	16	62	30	37
O14737	PDCD5	Programmed cell death protein 5	224.34	1	0	2048000000	692750000	848070000	888450000	47	28	16	25
O14744	PRMT5	Protein arginine N-methyltransferase 5	79.222	1	0	312890000	252990000	196210000	169700000	30	16	21	18
O14773	TPP1	Tripeptidyl-peptidase 1	51.552	3	0	150780000	172400000	317360000	233310000	6	5	16	26
O14776	TCERG1	Transcription elongation regulator 1	30.607	1	0	117220000	69342000	367030000	969900000	16	11	28	46
O14818	PSMA7	Proteasome subunit alpha type-7	237.38	4	0	2308900000	2216200000	1510400000	1263700000	84	73	54	53
O14828	SCAMP3	Secretory carrier-associated membrane protein 3	113.98	1	0	179710000	0	319010000	337130000	8	8	19	23
O14880	MGST3	Microsomal glutathione S-transferase 3	252.04	5	0	432260000	513430000	299260000	1080600000	16	21	9	56
P19105	MYL12A	Myosin regulatory light chain 12A	323.31	1	11.2	2291900000	4874500000	1808100000	1586900000	59	87	38	28
O14979	HNRNPDL	Heterogeneous nuclear ribonucleoprotein D-like	100.82	1	8.1	1674400000	1334900000	2959800000	3526100000	43	41	49	71
O14980	XPO1	Exportin-1	215.97	1	5.3	2075800000	1797800000	2099800000	1852200000	86	98	87	91
O15042	U2SURP	U2 snRNP-associated SURP motif-containing protein	25.385	1	5.9	113340000	207590000	249900000	366370000	5	6	12	28
O15143	ARPC1B	Actin-related protein 2/3 complex subunit 1B	129.57	15	59	904920000	1081200000	554800000	249030000	45	58	12	5
O15144	ARPC2	Actin-related protein 2/3 complex subunit 2	96.899	19	83.9	1281900000	1499100000	1070900000	746730000	50	57	35	30
O15145	ARPC3	Actin-related protein 2/3 complex subunit 3	66.115	11	35.3	813870000	1104300000	610740000	566840000	31	43	17	13
O15173	PGRMC2	Membrane-associated progesterone receptor component 2	68.874	3	22.2	288520000	0	250660000	356040000	22	7	10	30
O15212	PFDN6	Prefoldin subunit 6	148.34	16	62.7	242820000	257530000	0	126460000	14	13	7	7
O15347	HMGB3	High mobility group protein B3	40.215	15	21.3	1487700000	609940000	1676200000	1881800000	40	13	32	51
O15355	PPM1G	Protein phosphatase, Mg2+/Mn2+ dependent 1G	184.91	7	28.7	895270000	887070000	1332800000	640310000	51	48	47	29
O15371	EIF3D	Eukaryotic translation initiation factor 3 subunit D	255.34	20	85.5	971480000	1093800000	733240000	802700000	60	65	23	48
O15372	EIF3H	Eukaryotic translation initiation factor 3 subunit H	132.16	11	42.3	1339000000	1469900000	923300000	803070000	60	78	30	42
O15511	ARPC5	Actin-related protein 2/3 complex subunit 5	59.463	14	25.4	278300000	355030000	346550000	183880000	15	29	11	7
O43143	DHX15	Pre-mRNA-splicing factor ATP-dependent RNA helicase DHX15	147.32	1	8.9	1869900000	1276600000	2104600000	2216900000	77	65	87	118
O43169	CYB5B	Cytochrome b5 type B	77.359	2	7.5	871010000	524230000	368600000	856440000	29	18	16	15
O43172	PRPF4	U4/U6 small nuclear ribonucleoprotein Prp4	48.345	30	62.3	218570000	256650000	362130000	406920000	11	25	11	35
O43175	PHGDH	D-3-phosphoglycerate dehydrogenase	323.31	33	59.4	385550000	455720000	6716000000	3396200000	22	29	127	91
O43242	PSMD3	26S proteasome non-ATPase regulatory subunit 3	175.75	6	31.7	1283100000	1437000000	1073400000	975320000	74	99	60	66
O43324	EEF1E1	Eukaryotic translation elongation factor 1 epsilon-1	44.727	5	47.5	130990000	160010000	166790000	193980000	5	5	11	17
O43390	HNRNPR	Heterogeneous nuclear ribonucleoprotein R	323.31	1	3.8	2708900000	1675000000	7140900000	5984900000	76	56	143	127
O43396	TXNL1	Thioredoxin-like protein 1	78.817	1	11.3	617450000	395530000	455970000	1031200000	18	12	14	56
O43399	TPD52L2	Tumor protein D52 like 2	323.31	2	20.8	1147300000	2526300000	1770900000	402840000	23	53	20	9
O43583	DENR	Density-regulated protein	32.376	15	21.2	0	0	125360000	0	7	8	8	7
O43598	DNPH1	2'-deoxynucleoside 5'-phosphate N-hydrolase 1	87.983	3	3.2	239000000	317310000	350880000	282620000	12	18	15	17
O43615	TIMM44	Mitochondrial import inner membrane translocase subunit TIM44	114.61	5	19.6	90957000	302180000	407040000	980260000	5	19	25	42
O43670	ZNF207	BUB3-interacting and GLEBS motif-containing protein ZNF207	7.9549	12	44.4	234750000	194720000	198510000	329820000	15	7	10	16
O43681	ASNA1	ATPase ASNA1	94.73	2	3.9	160010000	408010000	757190000	725160000	9	39	34	36
O43684	BUB3	Mitotic checkpoint protein BUB3	247.46	5	18.7	1246600000	1065400000	1201300000	1641500000	53	60	21	57
O43707	ACTN4	Alpha-actinin-4	323.31	1	1.2	50829000000	21551000000	11580000000	12910000000	660	408	189	244
O43765	SGTA	Small glutamine-rich tetratricopeptide repeat-containing protein alpha	59.028	4	47.8	487250000	668560000	840940000	1110500000	14	25	32	39
O43776	NARS	Asparagine--tRNA ligase, cytoplasmic	323.31	5	6.5	1487000000	1436800000	1838400000	3614800000	65	78	62	117
O43809	NUDT21	Cleavage and polyadenylation specificity factor subunit 5	61.435	5	56.7	538170000	544200000	882770000	1200200000	43	29	22	54
O43818	RRP9	U3 small nucleolar RNA-interacting protein 2	116.02	1	5.4	173070000	469640000	432980000	284750000	12	29	26	21
O43837	IDH3B	Isocitrate dehydrogenase [NAD] subunit beta, mitochondrial	54.542	4	11	404590000	291420000	374980000	385530000	20	18	28	41
O43852	CALU	Calumenin	323.31	11	26.2	1946600000	3328700000	4639800000	3362500000	55	101	91	65
O43920	NDUFS5	NADH dehydrogenase [ubiquinone] iron-sulfur protein 5	11.649	13	19.6	107010000	140800000	201100000	119930000	11	9	16	12
O60264	SMARCA5	SWI/SNF-related matrix-associated actin-dependent regulator of chromatin subfamily A member 5	304.56	12	46	788600000	691750000	1543900000	1964100000	36	37	86	130
O60271	SPAG9	C-Jun-amino-terminal kinase-interacting protein 4	66.449	16	57	0	271380000	233150000	192460000	11	34	14	7
O60506	SYNCRIP	Heterogeneous nuclear ribonucleoprotein Q	323.31	4	18.6	5645200000	5820200000	6222100000	10652000000	140	153	113	189
O60610	DIAPH1	Protein diaphanous homolog 1	83.526	4	6.3	102510000	450850000	36609000	773790000	10	54	5	52
O60684	KPNA6	Importin subunit alpha-7	121.92	14	17.2	480210000	405070000	297180000	257150000	23	27	22	24
O60716	CTNND1	Catenin delta-1	299.13	17	55.1	552610000	890830000	513810000	876120000	54	81	21	68
O60762	DPM1	Dolichol-phosphate mannosyltransferase subunit 1	23.365	4	21.1	169950000	273800000	182580000	331120000	9	10	6	28
O60763	USO1	General vesicular transport factor p115	63.591	4	4.9	0	112720000	236710000	127060000	8	16	23	10
O60832	DKC1	H/ACA ribonucleoprotein complex subunit 4	133.94	1	14.1	524360000	711590000	693240000	575510000	26	53	37	36
O60841	EIF5B	Eukaryotic translation initiation factor 5B	91.873	1	4	649090000	604560000	529150000	338370000	50	42	31	15
O60884	DNAJA2	DnaJ homolog subfamily A member 2	108.66	10	69.7	645330000	506260000	497360000	510240000	41	30	21	25
O75083	WDR1	WD repeat-containing protein 1	323.31	10	24.7	4260600000	4937100000	2353000000	1913000000	114	192	43	41
O75131	CPNE3	Copine-3	114.37	8	27.4	1208400000	2142000000	1154400000	1520000000	42	98	49	68
O75306	NDUFS2	NADH dehydrogenase [ubiquinone] iron-sulfur protein 2, mitochondrial	113.3	1	12.7	427350000	325830000	800150000	1514000000	15	11	20	72
O75340	PDCD6	Programmed cell death protein 6	68.911	7	15.8	473960000	537790000	660760000	582670000	15	22	18	30
O75347	TBCA	Tubulin-specific chaperone A	100.94	12	50.9	1373600000	1294600000	2006100000	951060000	29	33	19	17
O75367	H2AFY	Core histone macro-H2A.1	323.31	2	5.2	1793600000	1632600000	5543600000	14299000000	56	34	87	155
O75369	FLNB	Filamin-B	323.31	3	14	39370000000	31265000000	1698900000	5805200000	856	765	23	172
O75380	NDUFS6	NADH dehydrogenase [ubiquinone] iron-sulfur protein 6, mitochondrial	19.948	5	24	0	115480000	340770000	211500000	8	6	11	14
O75390	CS	Citrate synthase, mitochondrial	323.31	9	17.6	3012900000	4590300000	5632500000	9986100000	68	109	102	140
O75396	SEC22B	Vesicle-trafficking protein SEC22b	67.597	5	19.8	213530000	318660000	506280000	375950000	9	15	17	23
O75400	PRPF40A	Pre-mRNA-processing factor 40 homolog A	46.584	6	27.4	357650000	494480000	534910000	502180000	17	21	28	25
O75431	MTX2	Metaxin-2	102.56	5	36.4	146210000	147880000	165140000	297230000	8	5	13	25
O75475	PSIP1	PC4 and SFRS1-interacting protein	323.31	15	36.1	619360000	232680000	7198900000	5764800000	20	13	125	108
O75489	NDUFS3	NADH dehydrogenase [ubiquinone] iron-sulfur protein 3, mitochondrial	118.59	4	20.3	415010000	508330000	986570000	1671400000	20	25	43	71
O75531	BANF1	Barrier-to-autointegration factor	80.389	3	28.6	2991000000	1579000000	4046700000	3933200000	45	41	47	47
O75533	SF3B1	Splicing factor 3B subunit 1	246.86	3	32.3	1936300000	1336000000	1794000000	1765500000	106	63	101	126
O75534	CSDE1	Cold shock domain-containing protein E1	108.78	13	60.9	335170000	374390000	610840000	281180000	17	27	42	11
O75608	LYPLA1	Acyl-protein thioesterase 1	101.29	15	30.6	412100000	325820000	453720000	689120000	20	17	26	46
O75643	SNRNP200	U5 small nuclear ribonucleoprotein 200 kDa helicase	323.31	18	29.8	2485800000	2126300000	3211700000	2840800000	140	96	171	213
O75694	NUP155	Nuclear pore complex protein Nup155	156.82	4	63.6	174760000	170400000	411480000	569830000	16	15	20	54
O75821	EIF3G	Eukaryotic translation initiation factor 3 subunit G	90.903	2	2.6	1003600000	1497500000	1090100000	709070000	22	71	31	18
O75822	EIF3J	Eukaryotic translation initiation factor 3 subunit J	55.327	11	39.5	164850000	181600000	160330000	106040000	14	11	6	7
O75874	IDH1	Isocitrate dehydrogenase 1, cytosolic	127.12	4	8.9	1542500000	2244500000	1691600000	188710000	79	86	49	9
O75947	ATP5H	ATP synthase subunit d, mitochondrial	124.26	10	42.3	987210000	1149600000	3270200000	2874800000	32	37	52	71
O75964	ATP5L	ATP synthase subunit g, mitochondrial	34.564	20	22.8	315570000	233720000	1104500000	1198200000	9	6	28	28
O76021	RSL1D1	Ribosomal L1 domain-containing protein 1	184.56	1	2.5	2213500000	2000900000	1892300000	1888200000	71	71	47	69
O76094	SRP72	Signal recognition particle subunit SRP72	253.51	18	42.3	266830000	283590000	607440000	270270000	22	32	34	29
O94826	TOMM70A	Mitochondrial import receptor subunit TOM70	231.51	1	7.3	751390000	983500000	1327300000	1090800000	28	50	44	69
O94906	PRPF6	Pre-mRNA-processing factor 6	118.04	14	20.1	182430000	94012000	521790000	460380000	22	27	50	45
O94925	GLS	Glutaminase kidney isoform, mitochondrial	323.31	4	29.8	1330500000	4304100000	2098200000	1629600000	51	187	90	79
O94973	AP2A2	AP-2 complex subunit alpha-2	95.206	3	16.9	593360000	464620000	533070000	683020000	36	26	22	61
O94979	SEC31A	Protein transport protein Sec31A	36.073	17	44	429190000	244170000	494680000	270850000	24	24	25	7
O95168	NDUFB4	NADH dehydrogenase [ubiquinone] 1 beta subcomplex subunit 4	13.378	2	3.2	0	0	178310000	176010000	5	9	8	10
O95202	LETM1	Mitochondrial proton/calcium exchanger protein	82.769	22	51.4	377030000	506720000	581460000	489170000	20	24	28	35
O95232	LUC7L3	Luc7-like protein 3	190.86	20	20.8	266270000	172070000	444670000	676620000	18	11	23	31
O95299	NDUFA10	NADH dehydrogenase [ubiquinone] 1 alpha subcomplex subunit 10, mitochondrial	41.754	8	53.9	234780000	254240000	470970000	276030000	9	14	15	23
O95336	PGLS	6-phosphogluconolactonase	111.14	5	63.6	493570000	763550000	454970000	355120000	28	68	10	13
O95347	SMC2	Structural maintenance of chromosomes protein 2	118.71	4	21.1	300980000	221350000	267460000	449280000	38	18	22	56
O95373	IPO7	Importin-7	230.68	22	60.1	1819000000	1120200000	1272200000	1542000000	76	56	59	108
O95399	UTS2	Urotensin 2	9.6371	7	56.3	0	0	0	2737500000	12	5	9	12
O95433	AHSA1	Activator of 90 kDa heat shock protein ATPase homolog 1	199.71	14	38	1556100000	2464500000	1037100000	1192300000	74	92	34	45
O95573	ACSL3	Long-chain-fatty-acid--CoA ligase 3	114.94	44	51.4	940520000	538070000	594170000	866500000	49	27	17	61
O95777	LSM8	U6 snRNA-associated Sm-like protein LSm8	12.447	2	0.9	0	141360000	172220000	185970000	8	6	7	6
O95782	AP2A1	AP-2 complex subunit alpha-1	68.666	22	26	185010000	225860000	269300000	290940000	17	25	17	40
O95793	STAU1	Double-stranded RNA-binding protein Staufen homolog 1	47.406	9	11.9	0	108890000	0	40141000	6	16	15	5
O95831	AIFM1	Apoptosis-inducing factor 1, mitochondrial	126.71	5	30.7	846640000	877750000	1296100000	1364700000	48	55	48	71
O95881	TXNDC12	Thioredoxin domain-containing protein 12	13.907	4	19.1	191020000	123900000	272390000	163430000	11	12	19	8
O96000	NDUFB10	NADH dehydrogenase [ubiquinone] 1 beta subcomplex subunit 10	61.873	12	78.9	247540000	201870000	445230000	589740000	8	17	18	23
O96008	TOMM40	Mitochondrial import receptor subunit TOM40 homolog	323.31	6	54.4	886540000	588340000	933810000	1302600000	39	24	45	67
O96019	ACTL6A	Actin-like protein 6A	206.73	24	51.6	340710000	593830000	1304300000	910500000	8	33	31	47
P00167	CYB5A	Cytochrome b5	162.91	9	19.7	369560000	445730000	371850000	2038500000	14	22	7	35
P00338	LDHA	Lactate dehydrogenase A	323.31	21	68.1	50203000000	38542000000	10085000000	16785000000	318	268	125	172
P00367	GLUD1	Glutamate dehydrogenase 1, mitochondrial	210.01	7	32.7	1747500000	3036000000	2500400000	1638300000	70	152	63	58
P00387	CYB5R3	NADH-cytochrome b5 reductase 3	323.31	17	36.4	238440000	1009100000	800120000	3037600000	9	53	17	63
P00390	GSR	Glutathione reductase, mitochondrial	323.31	1	8.9	3475000000	272040000	708360000	672230000	112	15	24	26
P00403	MT-CO2	Cytochrome c oxidase subunit 2	124.15	6	40.9	1154000000	968460000	1583300000	1875900000	35	34	27	28
P00441	SOD1	Superoxide dismutase [Cu-Zn]	323.31	20	48.2	4192300000	3433900000	11242000000	4098000000	61	54	67	42
P00491	PNP	Purine nucleoside phosphorylase	323.31	2	2.3	1534400000	2881500000	4215700000	3788200000	57	117	97	105
P00492	HPRT1	Hypoxanthine-guanine phosphoribosyltransferase	323.31	4	8.6	1965400000	2528900000	2184500000	2215400000	80	90	58	64
P00505	GOT2	Aspartate aminotransferase, mitochondrial	287.91	23	54.1	3588900000	3574000000	3077600000	4353400000	86	70	45	89
P00558	PGK1	Phosphoglycerate kinase 1	323.31	2	4.2	17638000000	28274000000	22577000000	15100000000	256	339	218	192
P00568	AK1	Adenylate kinase isoenzyme 1	41.085	2	4.6	0	734390000	432070000	648440000	8	23	16	37
P02545	LMNA	Prelamin-A/C	323.31	2	5	16103000000	22189000000	10013000000	7862400000	260	342	141	137
P02786	TFRC	Transferrin receptor protein 1	323.31	3	21.7	2639800000	4225200000	2326700000	1915500000	97	133	68	62
P04075	ALDOA	Fructose-bisphosphate aldolase A	323.31	3	11.3	29108000000	46203000000	14688000000	19603000000	278	445	198	283
P04080	CSTB	Cystatin-B	111.71	5	5	1654400000	3997100000	450760000	1537700000	29	44	11	27
P04083	ANXA1	Annexin A1	323.31	2	50	35059000000	44013000000	1949700000	3741600000	310	345	34	72
P04181	OAT	Ornithine aminotransferase, mitochondrial	294.65	12	20.3	77657000	1503500000	689690000	466480000	11	96	35	22
P04406	GAPDH	Glyceraldehyde-3-phosphate dehydrogenase	323.31	2	3.1	61840000000	41426000000	75274000000	69479000000	925	741	876	771
P04632	CAPNS1	Calpain small subunit 1	319.24	2	11.2	1319500000	1545100000	588000000	672310000	46	41	24	38
P04792	HSPB1	Heat shock protein beta-1	323.31	3	22.7	8840400000	55831000000	3560900000	3406500000	125	261	53	58
P04843	RPN1	Dolichyl-diphosphooligosaccharide--protein glycosyltransferase subunit 1	323.31	8	21.9	3437100000	3415000000	8099900000	7631600000	114	114	141	166
P04844	RPN2	Dolichyl-diphosphooligosaccharide--protein glycosyltransferase subunit 2	323.31	13	87.2	2554400000	2363900000	3973400000	3787000000	95	93	89	146
Q93077	HIST1H2AC	Histone H2A type 1-C	71.498	22	22.7	517240000	293740000	1816300000	1841600000	6	8	10	12
P05023	ATP1A1	Sodium/potassium-transporting ATPase subunit alpha-1	323.31	3	6.3	1836700000	2572200000	3597100000	6299500000	48	85	83	182
P05026	ATP1B1	Sodium/potassium-transporting ATPase subunit beta-1	69.093	2	1.2	0	0	324590000	1308100000	13	11	9	58
P05141	SLC25A5	ADP/ATP translocase 2	210.31	4	16.1	1850800000	1697000000	2243000000	3185500000	35	42	39	52
P05198	EIF2S1	Eukaryotic translation initiation factor 2 subunit 1	323.31	3	5.9	1933500000	3414600000	2658100000	2124700000	72	116	52	86
P05204	HMGN2	Non-histone chromosomal protein HMG-17	87.354	4	24	1375900000	2034900000	9965300000	8229300000	7	16	16	13
P05386	RPLP1	60S acidic ribosomal protein P1	323.31	1	8.1	3372900000	3621600000	3535600000	3728800000	43	24	30	23
P05387	RPLP2	60S acidic ribosomal protein P2	323.31	3	11.2	7229500000	6898400000	7964100000	5342900000	78	75	47	65
P05388	RPLP0	60S acidic ribosomal protein P0	323.31	3	3.3	6764800000	5819600000	5201300000	4752400000	123	116	85	72
P05455	SSB	Lupus La protein	175.12	2	8	2342800000	1737400000	2401000000	1160200000	100	102	88	50
P05556	ITGB1	Integrin beta-1	266.04	4	29.5	3175800000	1716900000	881330000	1234900000	110	86	26	54
P06454	PTMA	Prothymosin alpha	323.31	9	36.8	3679800000	5097500000	6001300000	3678600000	22	30	27	18
P06493	CDK1	Cyclin-dependent kinase 1	85.165	3	37.5	1172800000	1303800000	796940000	925820000	50	61	24	53
P06576	ATP5B	ATP synthase subunit beta, mitochondrial	323.31	15	29.2	7637400000	8329900000	23596000000	25244000000	143	136	210	223
P06730	EIF4E	Eukaryotic translation initiation factor 4E	90.045	2	7.2	439460000	345010000	451880000	321570000	16	21	13	13
P06733	ENO1	Alpha-enolase	323.31	2	5.9	54152000000	56727000000	63113000000	22635000000	497	641	710	191
P06744	GPI	Glucose-6-phosphate isomerase	323.31	13	37.4	14072000000	3948000000	3360200000	4441500000	195	96	50	92
P06748	NPM1	Nucleophosmin	323.31	1	5	17095000000	18003000000	17878000000	23103000000	106	126	88	94
P06753	TPM3	Tropomyosin alpha-3 chain	115.17	2	4.7	2205300000	3809700000	2084100000	1897800000	28	43	38	39
Q16778	HIST2H2BE	Histone H2B type 2-E	323.31	2	4.7	45297000000	31038000000	81728000000	98354000000	96	72	175	131
P07099	EPHX1	Epoxide hydrolase 1	103.89	3	21.1	867770000	482750000	322310000	463030000	69	7	8	25
P07108	DBI	Acyl-CoA-binding protein	169.88	9	38.3	1523100000	2049700000	8280400000	905210000	31	35	65	10
P07195	LDHB	Lactate dehydrogenase B	323.31	8	22.3	20756000000	9597000000	20946000000	7952600000	243	126	251	116
P07237	P4HB	Protein disulfide-isomerase	323.31	1	2.8	9189300000	9324900000	17580000000	20225000000	167	179	233	265
P07305	H1F0	Histone H1.0	44.723	1	11.9	639220000	661450000	873650000	1187400000	11	21	13	23
P07339	CTSD	Cathepsin D	297.58	4	34.9	1703100000	2976700000	1491000000	2267200000	57	78	41	43
P07355	ANXA2	Annexin A2	323.31	11	66.9	102520000000	53254000000	25041000000	24066000000	500	419	217	228
P07384	CAPN1	Calpain-1 catalytic subunit	64.686	10	65.7	729850000	769670000	294960000	750470000	44	52	9	41
P07437	TUBB	Tubulin beta chain	323.31	3	4	8255600000	6521400000	25464000000	16844000000	55	63	112	105
P07602	PSAP	Prosaposin	169.75	13	51.5	2656800000	3372800000	4337300000	2425800000	70	79	46	47
P07686	HEXB	Beta-hexosaminidase subunit beta	244.84	2	9.3	331620000	908160000	1424000000	5879600000	7	35	43	138
P07737	PFN1	Profilin-1	323.31	7	19.8	18657000000	11686000000	14622000000	3810000000	151	109	101	53
P07741	APRT	Adenine phosphoribosyltransferase	227.72	15	53.1	1411100000	2980100000	513370000	637900000	57	61	21	21
P07814	EPRS	Bifunctional glutamate/proline--tRNA ligase	323.31	7	56	4284200000	4824000000	4700100000	5283300000	215	272	145	266
P07900	HSP90AA1	Heat shock protein HSP 90-alpha	323.31	39	88	61809000000	85200000000	53355000000	56778000000	759	940	614	687
P07910	HNRNPC	Heterogeneous nuclear ribonucleoproteins C1/C2	287.98	25	59.5	8000700000	5586600000	14342000000	14907000000	92	81	94	96
P07919	UQCRH	Cytochrome b-c1 complex subunit 6, mitochondrial	149.23	2	27.3	544010000	437420000	671110000	1412000000	13	13	12	20
P07954	FH	Fumarate hydratase, mitochondrial	323.31	1	6	1388900000	2730000000	6748500000	8174000000	34	77	110	106
P08195	SLC3A2	4F2 cell-surface antigen heavy chain	323.31	12	73.9	13642000000	3872200000	191760000	3993200000	203	98	9	85
P08237	PFKM	ATP-dependent 6-phosphofructokinase, muscle type	209.72	14	16.2	0	300400000	1538000000	612030000	5	15	58	42
P08238	HSP90AB1	Heat shock protein HSP 90-beta	323.31	39	87.8	29473000000	24667000000	23921000000	25328000000	311	295	220	218
P08243	ASNS	Asparagine synthetase	80.209	2	6.7	730950000	808710000	337440000	860660000	42	54	5	55
P08559	PDHA1	Pyruvate dehydrogenase E1 component subunit alpha, somatic form, mitochondrial	184.01	5	21	527490000	606160000	620330000	1349600000	31	24	17	63
P08574	CYC1	Cytochrome c1, heme protein, mitochondrial	227.21	2	52.4	476590000	360000000	414590000	1049600000	14	17	20	32
P08579	SNRPB2	U2 small nuclear ribonucleoprotein B'	44.184	1	52.4	442280000	399440000	638520000	582620000	24	16	23	19
P08621	SNRNP70	U1 small nuclear ribonucleoprotein 70 kDa	88.367	4	41.6	1103400000	891850000	1846900000	1593700000	49	34	40	44
P08708	RPS17	Ribosomal protein S17	277.49	7	3.9	4294600000	3589500000	2718000000	2686800000	81	57	33	48
P08754	GNAI3	Guanine nucleotide-binding protein G(k) subunit alpha	79.89	1	5	0	138710000	250650000	186730000	6	9	20	18
P08758	ANXA5	Annexin A5	323.31	29	43.3	6153500000	7454300000	6905200000	2988600000	158	184	121	89
P08865	RPSA	40S ribosomal protein SA	323.31	1	54.1	9856500000	8664000000	7417800000	7279900000	133	125	95	86
P09012	SNRPA	U1 small nuclear ribonucleoprotein A	107.46	11	30	576510000	481980000	916070000	696820000	23	23	33	30
P09211	GSTP1	Glutathione S-transferase P	323.31	6	79.6	12190000000	20343000000	6266600000	4380500000	97	138	74	64
P09234	SNRPC	U1 small nuclear ribonucleoprotein C	66.838	30	76.6	438790000	438290000	887320000	635300000	14	14	16	15
P09429	HMGB1	High mobility group protein B1	323.31	10	60.4	7295100000	6263500000	13948000000	10874000000	83	101	92	83
P09496	CLTA	Clathrin light chain A	26.697	11	31.7	1162500000	685970000	1276400000	1009200000	21	12	15	17
P09543	CNP	2',3'-cyclic-nucleotide 3'-phosphodiesterase	157.32	18	43.3	579220000	701610000	708500000	997220000	28	40	31	62
P09622	DLD	Dihydrolipoyl dehydrogenase, mitochondrial	323.31	2	5.3	1496100000	2354300000	3092900000	3976300000	45	76	64	79
P09651	HNRNPA1	Heterogeneous nuclear ribonucleoprotein A1	323.31	1	19.7	17584000000	18042000000	35397000000	37497000000	224	206	248	247
P09661	SNRPA1	U2 small nuclear ribonucleoprotein A	172.79	1	54.1	430830000	347200000	523190000	509100000	16	17	16	42
P09669	COX6C	Cytochrome c oxidase subunit 6C	33.739	21	90.7	375540000	285030000	723010000	679830000	9	11	13	22
P09874	PARP1	Poly [ADP-ribose] polymerase 1	323.31	29	58.8	3732200000	3854100000	22356000000	15216000000	128	135	284	301
P09960	LTA4H	Leukotriene A-4 hydrolase	323.31	7	52.1	1849100000	1129200000	1540200000	1283000000	103	57	61	53
P09972	ALDOC	Aldolase, fructose-bisphosphate C	323.31	1	35.4	2472300000	3833100000	1524600000	1941700000	21	50	28	25
Q71UI9	H2AFV	Histone H2A.V	130.74	25	45.2	1406600000	1169500000	6134800000	3883000000	14	17	50	38
P0DMV9	HSPA1B	Heat shock protein family A member 1B	323.31	9	29.9	15220000000	14482000000	8916000000	8416100000	276	287	135	186
Q01081	U2AFBP	U2 small nuclear RNA auxiliary factor 1	107.25	9	63.1	380890000	302250000	578640000	761810000	19	17	19	28
P0DP25	CALM3	Calmodulin 3 (phosphorylase kinase, delta)	323.31	13	24.9	8323500000	8760700000	13531000000	7174300000	65	83	99	73
P10155	TROVE2	60 kDa SS-A/Ro ribonucleoprotein	22.973	25	73	347490000	591690000	438930000	372220000	7	11	19	26
P10515	DLAT	Dihydrolipoamide S-acetyltransferase	215.7	22	52.9	200970000	397330000	2015900000	4213300000	14	17	64	112
P10599	TXN	Thioredoxin	276.43	12	42.9	7768600000	3773200000	1361500000	988780000	111	68	23	20
P10606	COX5B	Cytochrome c oxidase subunit 5B, mitochondrial	42.503	26	77.4	969800000	813570000	2177400000	1528200000	22	36	30	48
P10620	MGST1	Microsomal glutathione S-transferase 1	84.699	1	8.2	1142200000	507370000	240350000	1667000000	36	20	11	39
P10644	PRKAR1A	cAMP-dependent protein kinase type I-alpha regulatory subunit	187.04	6	20.9	394690000	389790000	437860000	1499800000	12	21	13	73
P10768	ESD	S-formylglutathione hydrolase	182.73	2	6.8	817390000	570330000	1070400000	636690000	41	17	51	39
P10809	HSPD1	60 kDa heat shock protein, mitochondrial	323.31	8	33.5	25681000000	26708000000	46217000000	31608000000	411	481	522	525
P11021	HSPA5	78 kDa glucose-regulated protein	323.31	8	39.6	15716000000	18136000000	26941000000	75677000000	286	312	284	665
P11142	HSPA8	Heat shock cognate 71 kDa protein	323.31	7	41	44649000000	44311000000	42218000000	43426000000	401	422	277	360
P11172	UMPS	Uridine 5'-monophosphate synthase	44.902	18	49.1	323290000	405710000	281580000	244010000	23	39	14	9
P11177	PDHB	Pyruvate dehydrogenase E1 component subunit beta, mitochondrial	107.64	14	59.9	750160000	620120000	792190000	1595800000	32	25	24	42
P11216	PYGB	Glycogen phosphorylase, brain form	323.31	12	17.2	3658600000	4500800000	2564100000	1890300000	156	210	82	73
P11387	TOP1	DNA topoisomerase 1	93.436	10	83.9	983600000	1643300000	2834200000	1632100000	41	80	71	56
P11388	TOP2A	DNA topoisomerase 2-alpha	323.31	21	62.6	2761600000	948210000	3440500000	4296100000	167	68	126	199
P11413	G6PD	Glucose-6-phosphate 1-dehydrogenase	323.31	4	9.7	45107000000	11557000000	3418600000	2067000000	416	222	77	51
P11586	MTHFD1	C-1-tetrahydrofolate synthase, cytoplasmic	323.31	6	27.8	4468500000	7038800000	6856700000	6152300000	135	215	160	189
P11766	ADH5	Alcohol dehydrogenase class-3	167.86	14	43.2	769350000	712140000	1342700000	637220000	39	23	58	23
P11908	PRPS2	Ribose-phosphate pyrophosphokinase 2	96.746	17	32.6	0	251420000	314830000	472580000	10	14	18	22
P11940	PABPC1	Polyadenylate-binding protein 1	323.31	5	71.6	7450900000	7836300000	7738900000	7216400000	180	171	133	141
P12004	PCNA	Proliferating cell nuclear antigen	323.31	16	34.9	5092200000	4076700000	5638200000	6569000000	73	77	64	67
P12081	HARS	Histidine--tRNA ligase, cytoplasmic	163.62	8	83.6	621600000	900460000	929660000	483080000	40	48	36	21
P12236	SLC25A6	ADP/ATP translocase 3	323.31	73	62.3	12115000000	9586400000	12762000000	26533000000	162	128	165	345
P12268	IMPDH2	Inosine-5'-monophosphate dehydrogenase 2	323.31	7	25.1	4648600000	9753300000	5436100000	3663000000	110	216	129	98
P12270	TPR	Nucleoprotein TPR	323.31	44	66.5	635210000	345260000	1318900000	1487800000	44	25	97	112
P12814	ACTN1	Alpha-actinin-1	323.31	21	52.9	7215200000	11668000000	3736800000	3381400000	167	235	79	76
P12956	XRCC6	X-ray repair cross-complementing protein 6	323.31	3	75.1	6668600000	6508100000	7742200000	9628500000	166	208	167	205
P13010	XRCC5	X-ray repair cross-complementing protein 5	323.31	5	17.3	7689500000	8062700000	7943600000	9636300000	213	229	195	218
P13073	COX4I1	Cytochrome c oxidase subunit 4 isoform 1, mitochondrial	51.179	25	52.1	1272800000	1146200000	1704200000	2334300000	33	41	34	37
P13473	LAMP2	Lysosome-associated membrane glycoprotein 2	11.149	20	44.1	0	148500000	217570000	171270000	8	12	8	8
P13489	RNH1	Ribonuclease inhibitor	323.31	29	67	2755000000	2536400000	2382700000	1147500000	103	107	97	47
P13639	EEF2	Elongation factor 2	323.31	2	23.3	36192000000	62437000000	38440000000	22469000000	589	810	570	359
P13667	PDIA4	Protein disulfide-isomerase A4	323.31	18	54.9	5012800000	6970800000	8007700000	12055000000	186	195	172	243
P13693	TPT1	Translationally-controlled tumor protein	218.5	8	32.9	3540800000	4287500000	3545000000	1633700000	58	70	34	30
P13861	PRKAR2A	cAMP-dependent protein kinase type II-alpha regulatory subunit	140.39	9	60	148000000	340870000	185930000	171810000	5	24	14	17
P13987	CD59	CD59 glycoprotein	27.754	22	75.6	527960000	672460000	336200000	522580000	16	20	5	13
P14174	MIF	Macrophage migration inhibitory factor	229.13	7	31.6	2495400000	4624300000	5245900000	2872300000	16	34	32	20
P14314	PRKCSH	Glucosidase 2 subunit beta	323.31	13	63.6	1848600000	3578700000	7925900000	8881900000	52	83	117	104
P14324	FDPS	Farnesyl pyrophosphate synthase	123.78	8	33.5	750170000	900230000	827700000	1663600000	17	29	18	38
P14406	COX7A2	Cytochrome c oxidase subunit 7A2, mitochondrial	42.673	4	45.8	353040000	339740000	1029200000	774700000	7	10	19	13
P14550	AKR1A1	Alcohol dehydrogenase [NADP(+)]	152.07	13	61	1228700000	1194100000	1019500000	1563600000	23	18	24	53
P14618	PKM	Pyruvate kinase PKM	323.31	4	25.8	77257000000	42693000000	43397000000	23111000000	592	420	330	252
P14625	HSP90B1	Endoplasmin	323.31	9	86.7	15848000000	9324700000	43405000000	71742000000	276	187	640	914
P14649	MYL6B	Myosin light chain 6B	131.72	13	55.8	1659800000	3858600000	1125000000	1962100000	13	20	23	57
P63162	SNRPN	Small nuclear ribonucleoprotein-associated protein N	47.711	15	80	1813400000	1520300000	2432300000	2580400000	40	45	43	46
P14854	COX6B1	Cytochrome c oxidase subunit 6B1	143.43	1	5.3	804150000	682170000	1894500000	1497100000	29	23	34	28
P14866	HNRNPL	Heterogeneous nuclear ribonucleoprotein L	323.31	8	21	5995600000	4420600000	12001000000	16565000000	129	92	198	242
P14868	DARS	Aspartate--tRNA ligase, cytoplasmic	228.27	6	21.8	1822500000	2126600000	2276300000	1480400000	97	106	57	58
P14927	UQCRB	Cytochrome b-c1 complex subunit 7	35.589	19	50.1	281390000	0	141670000	288110000	6	7	7	19
P15121	AKR1B1	Aldose reductase	323.31	20	50.3	21599000000	13130000000	4070600000	2147400000	209	178	41	33
P15170	GSPT1	Eukaryotic peptide chain release factor GTP-binding subunit ERF3A	124.31	6	50.7	1154000000	1247000000	1493300000	1428400000	65	63	50	58
P15311	EZR	Ezrin	323.31	51	60.3	6029200000	6094100000	4400200000	2342300000	178	178	82	71
P15531	NME1	Nucleoside diphosphate kinase A	304.55	7	36.5	10814000000	8894200000	9645400000	6163500000	100	92	63	55
P15880	RPS2	Ribosomal protein S2	323.31	3	60	8268400000	6581700000	6959300000	5742200000	117	110	66	66
P15927	RPA2	Replication protein A 32 kDa subunit	243.79	22	64	663460000	523780000	1081500000	720280000	8	18	39	27
P16104	H2AFX	Histone H2AX	323.31	4	21.7	1823200000	1351900000	3943600000	2408600000	29	15	32	35
P16152	CBR1	Carbonyl reductase [NADPH] 1	323.31	1	45.9	2979400000	1431900000	3442800000	1886500000	110	71	76	50
P16403	HIST1H1C	Histone H1.2	306.04	1	21.6	12964000000	5397600000	27809000000	22061000000	58	38	101	76
P16435	POR	NADPH--cytochrome P450 reductase	233.83	21	46.4	1218700000	1895200000	134730000	1999000000	50	82	7	102
P16615	ATP2A2	Sarcoplasmic/endoplasmic reticulum calcium ATPase 2	323.31	11	44.7	4223000000	1767500000	5370100000	14112000000	112	45	106	263
P16949	STMN1	Stathmin	323.31	6	19.8	1083400000	689330000	10914000000	2223600000	32	28	78	46
P17066	HSPA6	Heat shock 70 kDa protein 6	47.276	9	33	0	0	0	3069000000	15	24	11	12
P17096	HMGA1	High mobility group protein HMG-I/HMG-Y	167.12	10	68.4	1015300000	1747400000	2752500000	1261500000	32	47	40	33
P17174	GOT1	Aspartate aminotransferase, cytoplasmic	133.95	52	81.8	733110000	1400900000	682370000	1119100000	25	90	28	74
P17480	UBTF	Nucleolar transcription factor 1	44.259	5	14.4	433190000	317130000	698830000	636270000	12	14	30	42
P17812	CTPS1	CTP synthase 1	248.05	13	49.6	1987000000	954910000	1254800000	1616100000	99	64	37	81
P17844	DDX5	Probable ATP-dependent RNA helicase DDX5	323.31	9	26.1	4399700000	3266000000	6167900000	6185000000	150	117	124	145
P17858	PFKL	ATP-dependent 6-phosphofructokinase, liver type	173.89	37	57.9	194840000	548670000	742120000	743220000	8	27	33	43
P17980	PSMC3	26S proteasome regulatory subunit 6A	307.11	4	43.2	1302100000	1124900000	1457600000	1269700000	76	59	61	66
P17987	TCP1	T-complex protein 1 subunit alpha	323.31	8	22.8	6076000000	5646100000	3183500000	5331200000	155	137	72	124
P18077	RPL35A	60S ribosomal protein L35a	25.197	48	45.6	2025200000	1833300000	1372200000	1545800000	31	37	14	21
P18085	ARF4	ADP-ribosylation factor 4	28.815	3	22.3	448950000	704990000	404460000	415650000	33	40	13	12
P18124	RPL7	60S ribosomal protein L7	323.31	8	9.7	6846200000	6702300000	5966100000	5023100000	134	96	85	81
P18206	VCL	Vinculin	323.31	44	63.6	10202000000	7607300000	2127500000	646260000	303	254	63	20
P18621	RPL17	60S ribosomal protein L17	244.33	10	55.8	3807800000	3669800000	3799400000	3220400000	75	84	52	49
P18669	PGAM1	Phosphoglycerate mutase 1	323.31	3	50	10420000000	12132000000	5602400000	4784700000	167	184	99	89
P18754	RCC1	Regulator of chromosome condensation	234.38	23	58.2	595800000	855480000	721770000	628270000	20	49	28	28
P18859	ATP5J	ATP synthase-coupling factor 6, mitochondrial	183.39	2	43.1	331140000	409240000	1023600000	1065700000	11	18	17	21
P19338	NCL	Nucleolin	323.31	45	26.6	14397000000	14628000000	17670000000	11545000000	257	233	211	177
P19367	HK1	Hexokinase-1	273.71	22	74.8	319310000	1053500000	1640900000	2250800000	7	58	86	68
P19404	NDUFV2	NADH dehydrogenase [ubiquinone] flavoprotein 2, mitochondrial	18.199	7	27.2	156040000	159940000	354400000	312580000	7	9	19	24
P19525	EIF2AK2	Interferon-induced, double-stranded RNA-activated protein kinase	20.311	41	75.4	152000000	150020000	202060000	120450000	25	23	17	9
P19623	SRM	Spermidine synthase	154.3	6	9.1	500630000	942260000	548810000	470070000	22	46	25	19
P20042	EIF2S2	Eukaryotic translation initiation factor 2 subunit 2	72.768	44	70.8	1039200000	1397500000	986300000	977980000	53	68	25	35
P20073	ANXA7	Annexin A7	182.01	11	53.3	780450000	1211300000	345750000	1027900000	35	62	12	43
P20290	BTF3	Transcription factor BTF3	323.31	1	4.4	1473700000	1147800000	766750000	595890000	62	67	10	24
P20340	RAB6A	Ras-related protein Rab-6A	117.41	28	39.2	1014400000	736220000	1141900000	1753800000	14	24	20	42
P20618	PSMB1	Proteasome subunit beta type-1	261.08	3	23.2	1520300000	1635000000	1144900000	1052200000	61	57	25	40
P20674	COX5A	Cytochrome c oxidase subunit 5A, mitochondrial	83.386	48	61.1	1829400000	1921700000	3404400000	3226000000	46	46	32	62
P20700	LMNB1	Lamin-B1	323.31	19	43.6	3083500000	2903300000	13582000000	15710000000	92	83	216	253
P20810	CAST	Calpastatin	140.78	1	3.4	771380000	911510000	299420000	402800000	45	54	9	28
P20962	PTMS	Parathymosin	59.814	10	18.6	1644900000	880380000	3127100000	1577500000	24	10	20	21
P21281	ATP6V1B2	V-type proton ATPase subunit B, brain isoform	123.16	2	9.6	411090000	341490000	1045300000	1494900000	24	14	62	108
P21291	CSRP1	Cysteine and glycine-rich protein 1	285.09	11	52.3	3396700000	1701900000	574020000	304570000	51	47	12	6
P21333	FLNA	Filamin-A	323.31	4	36.5	51787000000	79719000000	21877000000	13335000000	941	1165	380	339
P21796	VDAC1	Voltage-dependent anion-selective channel protein 1	323.31	3	30.1	4133200000	4191800000	5242700000	7078200000	91	105	81	126
P21912	SDHB	Succinate dehydrogenase [ubiquinone] iron-sulfur subunit, mitochondrial	31.059	14	63.7	358140000	372630000	623150000	539800000	14	21	35	26
P21964	COMT	Catechol O-methyltransferase	100.87	2	9.7	640370000	2068200000	891700000	852270000	19	45	16	20
P22061	PCMT1	Protein-L-isoaspartate(D-aspartate) O-methyltransferase	150.73	7	75.6	793070000	966990000	976320000	2105700000	34	41	26	62
P22087	FBL	rRNA 2'-O-methyltransferase fibrillarin	132.17	1	2.4	2908000000	1882500000	4106900000	3038300000	68	54	84	68
P22102	GART	Trifunctional purine biosynthetic protein adenosine-3	323.31	26	66.7	2736800000	2260000000	4865300000	4125500000	101	88	144	117
P22234	PAICS	Multifunctional protein ADE2	323.31	22	56.4	4105100000	3018900000	5542900000	3686700000	120	99	118	112
P22307	SCP2	Non-specific lipid-transfer protein	62.297	6	49.5	226430000	265700000	1099400000	728120000	12	14	33	41
P22314	UBA1	Ubiquitin-like modifier-activating enzyme 1	323.31	8	24.4	6346800000	8335400000	12006000000	6844500000	181	285	259	223
P22392	NME1-NME2	Nucleoside diphosphate kinase B	323.31	18	69.9	8502200000	7491300000	4879000000	4724600000	85	85	55	62
P22626	HNRNPA2B1	Heterogeneous nuclear ribonucleoproteins A2/B1	323.31	12	50.3	17366000000	12742000000	42997000000	45031000000	265	216	523	596
P22695	UQCRC2	Cytochrome b-c1 complex subunit 2, mitochondrial	250.16	5	23.3	2328000000	1798100000	2256300000	4298300000	78	72	55	89
P23193	TCEA1	Transcription elongation factor A protein 1	73.1	16	52.9	461370000	0	502270000	322970000	33	6	26	26
P23246	SFPQ	Splicing factor, proline- and glutamine-rich	323.31	9	23	7293000000	6166400000	12389000000	15841000000	159	138	168	185
P23258	TUBG1	Tubulin gamma-1 chain	176.81	14	46.8	231090000	257130000	266110000	954470000	15	10	9	64
P23284	PPIB	Peptidyl-prolyl cis-trans isomerase B	295.85	1	3.5	5389700000	3233800000	9242600000	13213000000	67	65	73	118
P23368	ME2	NAD-dependent malic enzyme, mitochondrial	323.31	2	5.2	717310000	699020000	2082800000	3035400000	22	18	88	124
P23381	WARS	Tryptophan--tRNA ligase, cytoplasmic	323.31	9	49.3	1658300000	4612900000	1531200000	3387400000	54	181	37	113
P23396	RPS3	40S ribosomal protein S3	244.48	1	0.9	11266000000	9124600000	8534900000	8042000000	196	188	147	139
P23526	AHCY	Adenosylhomocysteinase	323.31	15	75.5	6130100000	5274000000	5720100000	3924000000	121	123	78	79
P23528	CFL1	Cofilin-1	323.31	1	2.2	27929000000	19497000000	27755000000	24274000000	207	169	185	168
P23588	EIF4B	Eukaryotic translation initiation factor 4B	323.31	3	4.9	1826000000	2208600000	1498500000	1251100000	54	92	36	40
P23919	DTYMK	Thymidylate kinase	15.664	3	27.7	520430000	341740000	452570000	299900000	43	34	19	15
P24534	EEF1B2	Elongation factor 1-beta	323.31	35	44.2	2894800000	3150000000	3209200000	3372000000	62	58	43	51
P24539	ATP5F1	ATP synthase F(0) complex subunit B1, mitochondrial	323.31	18	50.4	1037300000	898390000	1754900000	2477100000	50	38	49	65
P24666	ACP1	Low molecular weight phosphotyrosine protein phosphatase	40.162	7	41.6	632030000	444630000	500640000	406460000	23	23	19	13
P24752	ACAT1	Acetyl-CoA acetyltransferase, mitochondrial	323.31	8	48.1	740280000	1081700000	2455200000	1454400000	24	32	77	53
P25205	MCM3	DNA replication licensing factor MCM3	323.31	5	29.2	1943100000	1834000000	2744900000	3190300000	86	57	90	129
P25398	RPS12	Ribosomal protein S12	323.31	4	31.4	6573000000	5970200000	5465700000	4145700000	66	68	55	41
P25685	DNAJB1	DnaJ homolog subfamily B member 1	69.358	27	53.7	781390000	991980000	897840000	572630000	46	51	28	25
P25705	ATP5A1	ATP synthase subunit alpha, mitochondrial	323.31	12	80.7	9450600000	9907200000	27290000000	29467000000	199	207	257	287
P25786	PSMA1	Proteasome subunit alpha type-1	149.06	17	47.4	2494700000	2231000000	1828600000	1442600000	98	79	40	45
P25787	PSMA2	Proteasome subunit alpha type-2	111.69	30	58.6	1665000000	1438200000	565980000	768620000	60	52	23	31
P25788	PSMA3	Proteasome subunit alpha type-3	78.371	18	45.4	897980000	750950000	603170000	512360000	27	36	15	14
P25789	PSMA4	Proteasome subunit alpha type-4	267.96	6	28.4	2510300000	2120500000	1434400000	1270600000	106	78	49	57
P26038	MSN	Moesin	323.31	30	73.7	9760300000	15591000000	10197000000	3330200000	243	299	142	38
P26196	DDX6	Probable ATP-dependent RNA helicase DDX6	224.58	12	39.3	1035700000	751450000	963790000	1684900000	44	35	19	74
P26358	DNMT1	DNA (cytosine-5)-methyltransferase 1	135.97	7	30	0	314190000	1614200000	1368700000	5	16	36	101
P26368	U2AF2	Splicing factor U2AF 65 kDa subunit	238.23	7	65.6	1718800000	2022500000	3017200000	2882700000	63	83	59	78
P26373	RPL13	Ribosomal protein L13	260.77	18	54.8	4141400000	3673400000	4466500000	2893800000	70	68	37	63
P26583	HMGB2	High mobility group protein B2	323.31	12	53.8	1400000000	1589500000	7869800000	6334300000	27	47	75	76
P26599	PTBP1	Polypyrimidine tract-binding protein 1	323.31	21	82.7	6844900000	7013300000	9449600000	12551000000	119	130	149	185
P26639	TARS	Threonine--tRNA ligase, cytoplasmic	274.14	13	59.4	3417400000	2832300000	3475400000	2777800000	154	140	103	134
P26640	VARS	Valine--tRNA ligase	323.31	14	21.8	1312300000	2295100000	1762200000	2895200000	37	145	90	171
P26641	EEF1G	Elongation factor 1-gamma	323.31	5	49.1	11717000000	9807200000	6136400000	13222000000	190	174	93	168
P27348	YWHAQ	14-3-3 protein theta	323.31	10	9.8	7831300000	6701500000	5050700000	3632500000	114	119	73	62
P27635	RPL10	60S ribosomal protein L10	323.31	7	54.8	5854300000	5483700000	5912200000	4951600000	109	74	79	63
P27694	RPA1	Replication protein A 70 kDa DNA-binding subunit	223.59	7	36.9	338230000	314240000	1436900000	629420000	19	13	54	34
P27695	APEX1	DNA-(apurinic or apyrimidinic site) lyase	323.31	10	22.7	1911100000	1936500000	2335700000	2374600000	70	60	69	81
P27708	CAD	CAD protein	307.53	14	63.9	1717400000	1123500000	1678400000	748340000	135	63	111	37
P27797	CALR	Calreticulin	323.31	2	7.7	8666400000	11748000000	20833000000	32081000000	132	202	193	293
P27816	MAP4	Microtubule-associated protein 4	323.31	5	16.4	2305500000	4012400000	1831200000	755240000	71	155	56	13
P27824	CANX	Calnexin	323.31	15	27.6	4698800000	3040300000	5412700000	20796000000	96	80	98	262
P28066	PSMA5	Proteasome subunit alpha type-5	153.93	3	35.5	1696700000	1612300000	1528700000	963460000	38	42	27	38
P28070	PSMB4	Proteasome subunit beta type-4	126.09	1	11.9	886690000	808200000	561240000	535780000	41	35	29	19
P28072	PSMB6	Proteasome subunit beta type-6	156.73	5	28.4	1606500000	1057000000	1022300000	796120000	43	39	19	35
P28074	PSMB5	Proteasome subunit beta type-5	143.64	3	41.4	1241500000	999700000	1089700000	856870000	46	35	27	34
P28331	NDUFS1	NADH-ubiquinone oxidoreductase 75 kDa subunit, mitochondrial	172.52	6	35	650280000	540360000	1660000000	959640000	27	23	96	70
P28482	MAPK1	Mitogen-activated protein kinase 1	170.89	18	45.2	454600000	577770000	470750000	518680000	9	40	21	36
P28838	LAP3	Cytosol aminopeptidase	39.509	4	23.5	187390000	278460000	170070000	118950000	16	24	23	7
P29218	IMPA1	Inositol monophosphatase 1	30.736	10	64.8	0	0	221910000	125980000	6	17	15	8
P29401	TKT	Transketolase	323.31	15	77.4	42810000000	17504000000	6622200000	5721300000	503	285	99	119
P29692	EEF1D	Elongation factor 1-delta	323.31	10	45.4	3240800000	3297300000	841970000	1680300000	68	57	23	23
P29966	MARCKS	Myristoylated alanine-rich C-kinase substrate	172.25	4	15.8	399570000	776370000	1410500000	1175400000	17	24	35	35
P30040	ERP29	Endoplasmic reticulum resident protein 29	84.45	20	39	744410000	777560000	2653000000	1862000000	35	29	56	89
P30041	PRDX6	Peroxiredoxin-6	323.31	14	30.7	5264000000	5559800000	6471500000	1841500000	138	138	112	54
P30044	PRDX5	Peroxiredoxin-5, mitochondrial	323.31	17	61.1	2049200000	1381100000	3889800000	2683800000	73	65	84	82
P30046	DDT	D-dopachrome decarboxylase	91.482	35	53.4	1035000000	1815100000	1650200000	1127600000	38	47	36	41
P30048	PRDX3	Thioredoxin-dependent peroxide reductase, mitochondrial	161.49	25	69.4	1908300000	1610000000	2519100000	2771900000	56	41	29	28
P30049	ATP5D	ATP synthase subunit delta, mitochondrial	116.71	12	23	536890000	728340000	1309800000	1418100000	10	8	17	29
P30050	RPL12	60S ribosomal protein L12	323.31	46	62.5	3903300000	3503200000	3482400000	2731100000	59	62	40	33
P30084	ECHS1	Enoyl-CoA hydratase, mitochondrial	215.44	2	79.6	1583600000	1933500000	1706100000	1060400000	69	71	45	57
P30085	CMPK1	UMP-CMP kinase	89.343	28	69.5	377210000	459440000	418530000	285480000	22	43	33	22
P30086	PEBP1	Phosphatidylethanolamine-binding protein 1	323.31	1	12.3	3295100000	1842600000	2000100000	2998100000	83	49	44	66
P30101	PDIA3	Protein disulfide-isomerase A3	323.31	26	69.1	6871400000	7384300000	29160000000	49200000000	147	186	272	377
P30153	PPP2R1A	Serine/threonine-protein phosphatase 2A 65 kDa regulatory subunit A alpha isoform	323.31	9	39.5	4735100000	6968300000	5821700000	6323100000	133	190	121	132
P30419	NMT1	Glycylpeptide N-tetradecanoyltransferase 1	79.76	11	43.9	476400000	585180000	339600000	374140000	35	37	9	16
P30520	ADSS	Adenylosuccinate synthetase isozyme 2	50.1	9	16.9	349470000	324420000	295820000	114930000	37	28	17	5
P30566	ADSL	Adenylosuccinate lyase	58.173	2	17.3	433010000	481610000	392250000	458820000	28	35	21	41
P30626	SRI	Sorcin	49.882	1	5.5	347670000	801980000	394630000	381470000	15	42	9	15
P30837	ALDH1B1	Aldehyde dehydrogenase X, mitochondrial	142.89	2	11.9	461780000	794810000	787670000	558850000	22	53	36	31
P30876	POLR2B	DNA-directed RNA polymerase II subunit RPB2	37.289	10	48.1	174330000	0	239390000	146730000	6	5	12	9
P31040	SDHA	Succinate dehydrogenase [ubiquinone] flavoprotein subunit, mitochondrial	323.31	1	2.9	1826700000	2533500000	6112400000	2988100000	49	118	138	115
P31150	GDI1	Rab GDP dissociation inhibitor alpha	323.31	10	65.3	378590000	798930000	1537200000	2096400000	16	52	56	90
P31153	MAT2A	S-adenosylmethionine synthase isoform type-2	30.138	12	46.1	1146300000	834720000	845030000	658100000	55	33	22	26
P31689	DNAJA1	DnaJ homolog subfamily A member 1	262.1	14	12	1942900000	1364300000	1820900000	1921400000	73	66	56	71
P31930	UQCRC1	Cytochrome b-c1 complex subunit 1, mitochondrial	323.31	39	56.9	2193400000	1904400000	2083300000	4148300000	74	80	60	127
P31937	HIBADH	3-hydroxyisobutyrate dehydrogenase, mitochondrial	120.49	2	16.4	205820000	434660000	329490000	410990000	6	25	18	20
P31939	ATIC	Bifunctional purine biosynthesis protein PURH	323.31	7	39.7	5160400000	3464000000	4338000000	1475100000	174	151	129	73
P31942	HNRNPH3	Heterogeneous nuclear ribonucleoprotein H3	323.31	9	75	1611300000	1313100000	3091600000	3984300000	48	37	57	78
P31943	HNRNPH1	Heterogeneous nuclear ribonucleoprotein H	323.31	6	15.7	5840700000	3516100000	12341000000	13155000000	73	67	233	287
P31946	YWHAB	14-3-3 protein beta/alpha	323.31	2	9.2	2994800000	4245400000	3443100000	1714700000	63	83	61	43
P31948	STIP1	Stress-induced-phosphoprotein 1	323.31	33	65.6	7955200000	3926100000	6069700000	6611900000	199	91	127	167
P32322	PYCR1	Pyrroline-5-carboxylate reductase 1, mitochondrial	152.75	34	67.9	356330000	486560000	1229700000	2147700000	18	18	37	74
P32969	RPL9	L ribosomal proteins	323.31	33	28.1	2867700000	2532300000	3066600000	2071500000	67	64	93	84
P33176	KIF5B	Kinesin-1 heavy chain	323.31	1	4	1269200000	682530000	1491600000	1346200000	80	42	100	89
P33240	CSTF2	Cleavage stimulation factor subunit 2	175.49	19	52.6	344920000	349730000	333490000	270310000	15	13	27	24
P33316	DUT	Deoxyuridine 5'-triphosphate nucleotidohydrolase, mitochondrial	66.283	12	51.2	1202200000	1148400000	1351800000	2503100000	48	38	35	51
P33991	MCM4	DNA replication licensing factor MCM4	323.31	37	61.3	2401900000	1901100000	3319700000	3226900000	79	81	133	158
P33992	MCM5	DNA replication licensing factor MCM5	193.75	42	55.4	1501800000	1531500000	2054600000	2443600000	58	52	81	100
P33993	MCM7	DNA replication licensing factor MCM7	314.18	26	72.8	2196600000	1780500000	2873500000	2694400000	100	89	113	121
P34897	SHMT2	Serine hydroxymethyltransferase, mitochondrial	323.31	9	56.5	2744800000	6113200000	4681100000	13380000000	77	153	89	188
P34932	HSPA4	Heat shock protein family A member 4	323.31	3	31.7	5325200000	4840500000	5532400000	3999100000	194	185	147	156
P35080	PFN2	Profilin-2	126.4	12	47.2	349290000	282370000	743660000	683000000	12	8	30	14
P35221	CTNNA1	Catenin alpha-1	323.31	15	56.9	1646100000	2882500000	1641000000	1616500000	58	165	62	70
P35222	CTNNB1	Catenin beta-1	296.7	52	36.4	531310000	1766800000	813580000	1315300000	11	101	26	74
P35232	PHB	Prohibitin	323.31	23	72.9	4608500000	3192600000	10510000000	5815900000	113	95	118	117
P35241	RDX	Radixin	127.29	31	53.4	1165800000	625080000	1239400000	1767700000	58	19	60	97
P35244	RPA3	Replication protein A 14 kDa subunit	57.887	4	7.5	301320000	416220000	926640000	608010000	18	14	21	20
P35249	RFC4	Replication factor C subunit 4	80.422	6	31.9	0	302360000	586820000	552640000	6	21	18	44
P35268	RPL22	Ribosomal protein L22	310.7	7	45.5	3202500000	2699300000	2956800000	2052700000	43	42	36	26
P35579	MYH9	Myosin-9	323.31	2	13.4	35663000000	89510000000	16003000000	19765000000	760	1290	287	416
P35580	MYH10	Myosin-10	323.31	25	53.8	608090000	656570000	4630900000	1361700000	27	17	208	86
P35606	COPB2	Coatomer subunit beta	179.82	12	20.3	1009200000	1178600000	1053400000	1038700000	67	95	49	70
P35613	BSG	Basigin	105.05	14	81.9	529620000	1082400000	774870000	1215700000	21	34	18	42
P35637	FUS	RNA-binding protein FUS	323.31	5	28.6	2329800000	2205100000	4492200000	4685100000	47	69	63	95
P35659	DEK	Protein DEK	141.85	12	32.4	735170000	602000000	1999000000	2318600000	22	20	41	62
P35998	PSMC2	26S proteasome regulatory subunit 7	323.31	28	30.5	1926700000	3046700000	2068100000	1499500000	92	143	62	70
P36542	ATP5C1	ATP synthase subunit gamma, mitochondrial	156.53	7	47.8	1140100000	1165600000	2783700000	3031600000	40	46	60	57
P36578	RPL4	L ribosomal proteins	323.31	9	59.1	9766100000	7592200000	7488900000	7677700000	180	151	88	124
P36776	LONP1	Lon protease homolog, mitochondrial	323.31	9	55.4	616780000	1102200000	5149100000	3167500000	17	29	168	155
P36873	PPP1CC	Serine/threonine-protein phosphatase PP1-gamma catalytic subunit	90.052	19	79	208990000	0	530960000	429900000	11	8	18	11
P36957	DLST	Dihydrolipoamide S-succinyltransferase (E2 component of 2-oxo-glutarate complex)	220.21	8	63.6	677930000	933170000	2531000000	2091400000	24	34	48	65
P37108	SRP14	Signal recognition particle 14 kDa protein	284.07	7	44.1	968720000	645220000	1816100000	2594400000	20	16	27	27
P37198	NUP62	Nuclear pore glycoprotein p62	45.924	3	37.5	208300000	132030000	233810000	240250000	6	7	21	27
P37802	TAGLN2	Transgelin-2	323.31	8	55.6	11106000000	23431000000	7406000000	6833800000	159	232	118	125
P37837	TALDO1	Transaldolase	116.62	12	82.4	4402400000	1889800000	1513100000	3270400000	104	63	45	62
P38159	RBMX	RNA-binding motif protein, X chromosome	163.72	7	32.3	3280400000	2589400000	5312600000	6943000000	75	61	66	85
P38606	ATP6V1A	V-type proton ATPase catalytic subunit A	283.16	4	12	569180000	878430000	1787700000	1321700000	28	43	89	78
P38646	HSPA9	Stress-70 protein, mitochondrial	323.31	4	30.4	8387300000	8296200000	11311000000	20230000000	178	210	167	275
P38919	EIF4A3	Eukaryotic initiation factor 4A-III	204.17	1	4.5	2067500000	1857800000	3623200000	2819900000	78	76	85	100
P39019	RPS19	40S ribosomal protein S19	135.56	11	34.3	5061400000	4497400000	3513600000	2520100000	71	70	48	51
P39023	RPL3	60S ribosomal protein L3	323.31	3	50.1	9102700000	8470500000	8153500000	7199600000	159	184	167	147
P39656	DDOST	Dolichyl-diphosphooligosaccharide--protein glycosyltransferase 48 kDa subunit	229.99	14	61.1	1244700000	1177800000	2267900000	1924200000	56	46	52	74
P39687	ANP32A	Acidic leucine-rich nuclear phosphoprotein 32 family member A	323.31	11	30.7	1705400000	1234500000	2518900000	1328500000	58	44	38	28
P39748	FEN1	Flap endonuclease 1	323.31	5	18.5	1015300000	656450000	2750700000	3319200000	40	35	53	80
P40227	CCT6A	T-complex protein 1 subunit zeta	323.31	10	61.1	6754200000	6425200000	3655500000	4729800000	159	159	92	108
P40429	RPL13A	60S ribosomal protein L13a	36.884	17	47.8	2000500000	1777500000	2029000000	1514800000	52	61	28	33
P40616	ARL1	ADP-ribosylation factor-like protein 1	26.081	25	54.7	196210000	140890000	123130000	123060000	17	12	8	16
P40925	MDH1	Malate dehydrogenase, cytoplasmic	196.62	6	44.1	2517600000	1918200000	3370200000	1724000000	46	45	52	32
P40926	MDH2	Malate dehydrogenase, mitochondrial	323.31	27	60.5	9010900000	16257000000	17269000000	25349000000	146	213	142	152
P40939	HADHA	Trifunctional enzyme subunit alpha, mitochondrial	323.31	12	34.2	2955600000	2705800000	4744400000	2166200000	122	134	130	103
P41091	EIF2S3	Eukaryotic translation initiation factor 2 subunit 3	295.58	2	17.7	3252700000	3182300000	2548900000	2746700000	103	114	63	88
P41223	BUD31	Protein BUD31 homolog	21.715	1	6.1	190990000	312210000	167120000	205800000	13	15	13	22
P41250	GARS	Glycine--tRNA ligase	323.31	3	16.8	2586000000	3649900000	2142900000	3982300000	100	170	48	137
P41252	IARS	Isoleucine--tRNA ligase, cytoplasmic	323.31	21	57.3	2129000000	2135600000	1007300000	2868400000	134	142	19	178
P41567	EIF1	Eukaryotic translation initiation factor 1	96.549	8	30.4	393330000	389820000	225080000	174390000	18	29	10	13
P42025	ACTR1B	Beta-centractin	6.3036	10	50.9	0	0	53416000	0	7	8	5	9
P42126	ECI1	Enoyl-CoA delta isomerase 1, mitochondrial	49.305	10	51.9	303690000	368270000	700330000	1149900000	6	28	23	42
P42166	TMPO	Lamina-associated polypeptide 2, isoform alpha	323.31	13	69.9	1483500000	643090000	2936300000	3870800000	65	18	78	124
P42167	TMPO	Lamina-associated polypeptide 2, isoform alpha	138.33	17	82.3	706640000	521110000	1005500000	2736300000	20	14	19	58
P42285	SKIV2L2	Superkiller viralicidic activity 2-like 2	57.57	8	86.7	340280000	178160000	282420000	276810000	29	14	36	37
P42677	RPS27	40S ribosomal protein S27	49.721	15	58.6	1291100000	1435500000	1069100000	797770000	41	26	18	15
P42704	LRPPRC	Leucine-rich PPR motif-containing protein, mitochondrial	323.31	28	51.2	7356400000	4994800000	6681700000	7614800000	259	209	186	272
P42765	ACAA2	3-ketoacyl-CoA thiolase, mitochondrial	323.31	11	34.8	411780000	418040000	5390300000	8860000000	17	21	120	156
P42766	RPL35	60S ribosomal protein L35	98.911	8	42.5	2840800000	1937300000	1480300000	1482800000	38	40	23	22
P43034	PAFAH1B1	Platelet-activating factor acetylhydrolase IB subunit alpha	100.19	3	7.4	954600000	660770000	1371500000	739170000	48	35	55	29
P43243	MATR3	Matrin-3	323.31	30	53.3	6115800000	4312000000	10123000000	17538000000	138	127	189	289
P43246	MSH2	DNA mismatch repair protein Msh2	142.78	33	59.5	730600000	0	1246200000	758620000	26	14	103	42
P43304	GPD2	Glycerol-3-phosphate dehydrogenase, mitochondrial	160.57	1	7.5	386690000	650550000	2253400000	1345100000	12	25	103	81
P43307	SSR1	Translocon-associated protein subunit alpha	15.705	6	20.5	173880000	204290000	275840000	410650000	8	16	17	16
P43487	RANBP1	Ran-specific GTPase-activating protein	323.31	4	11.3	2234900000	4566900000	4512300000	4926700000	48	64	52	74
P43490	NAMPT	Nicotinamide phosphoribosyltransferase	323.31	6	65	3215500000	7747700000	1665700000	1272300000	103	201	31	47
P43686	PSMC4	26S proteasome regulatory subunit 6B	306.29	4	26.6	2028500000	1586000000	1884600000	1554500000	89	69	72	74
P43897	TSFM	Elongation factor Ts, mitochondrial	103.29	35	63.5	227030000	625040000	276220000	837860000	9	34	8	32
P45880	VDAC2	Voltage-dependent anion-selective channel protein 2	323.31	19	82.7	2805500000	3594800000	3664100000	5133100000	77	82	73	93
P45973	CBX5	Chromobox protein homolog 5	217.61	20	56.4	668310000	846480000	1623700000	2199300000	16	29	51	47
P45974	USP5	Ubiquitin carboxyl-terminal hydrolase 5	243.91	6	67.8	1315500000	470320000	1846800000	1182300000	50	16	55	55
P46060	RANGAP1	Ran GTPase-activating protein 1	247.07	8	10.1	666160000	1423000000	796060000	1306900000	44	102	22	68
P46063	RECQL	ATP-dependent DNA helicase Q1	101.36	6	53.1	515830000	322650000	508290000	391260000	38	20	31	37
P46087	NOP2	Probable 28S rRNA (cytosine(4447)-C(5))-methyltransferase	36.845	4	11.6	730620000	579800000	989770000	688860000	40	28	41	28
P46109	CRKL	Crk-like protein	34.86	137	66.9	0	340040000	496880000	226320000	5	14	36	17
P46379	BAG6	Large proline-rich protein BAG6	83.069	57	46.5	134220000	294960000	322090000	293430000	6	14	20	26
P46459	NSF	Vesicle-fusing ATPase	116.57	26	40.8	284830000	376550000	870170000	1414700000	9	18	39	81
P46776	RPL27A	Ribosomal protein L27a	108.06	2	5.5	2985600000	3194400000	3171600000	2015300000	68	58	30	39
P46777	RPL5	60S ribosomal protein L5	202.37	9	22.8	6682500000	6215600000	6250700000	6054300000	120	121	72	74
P46778	RPL21	60S ribosomal protein L21	126.75	10	39.5	3165100000	2995600000	2313100000	2558700000	49	52	11	41
P46779	RPL28	60S ribosomal protein L28	323.31	10	22.8	2666700000	2050200000	1901800000	2042200000	33	29	20	18
P46781	RPS9	Ribosomal protein S9	119.12	11	10	5922000000	4630200000	5928600000	3868900000	105	98	58	66
P46782	RPS5	Ribosomal protein S5	323.31	13	30.9	6768100000	6397200000	3392800000	4484900000	78	72	49	61
P46783	RPS10	40S ribosomal protein S10	175.5	2	10.6	4077400000	3915600000	2164500000	3236500000	106	107	34	91
P46821	MAP1B	Microtubule-associated protein 1B	323.31	4	50.9	5118700000	340930000	9145500000	30757000000	184	7	242	654
P46926	GNPDA1	Glucosamine-6-phosphate isomerase 1	65.089	6	21.5	371330000	630120000	502900000	162230000	29	46	26	7
P46940	IQGAP1	Ras GTPase-activating-like protein IQGAP1	323.31	29	75.1	5269700000	5441900000	3342500000	3636700000	271	228	97	144
P46977	STT3A	Dolichyl-diphosphooligosaccharide--protein glycosyltransferase subunit STT3A	42.16	7	64.3	243000000	347820000	324930000	384890000	9	8	24	30
P47755	CAPZA2	F-actin-capping protein subunit alpha-2	60.932	12	41.9	497360000	581480000	295750000	293930000	31	23	5	16
P47756	CAPZB	F-actin-capping protein subunit beta	198.79	7	41.6	1116100000	1192200000	1358400000	678880000	41	57	34	16
P47813	EIF1AX	Eukaryotic translation initiation factor 1A, X-chromosomal	27.795	11	31.1	766170000	612340000	691470000	629700000	38	28	18	15
P47897	QARS	Glutamine--tRNA ligase	288.97	4	28.4	1149600000	1650700000	1091800000	1305200000	50	104	43	71
P47914	RPL29	60S ribosomal protein L29	41.019	40	56.9	1476100000	1667100000	1023400000	758180000	18	15	15	8
P47985	UQCRFS1	Cytochrome b-c1 complex subunit Rieske, mitochondrial	106.88	23	63	2060200000	1177600000	1716200000	3928900000	36	23	33	55
P48047	ATP5O	ATP synthase subunit O, mitochondrial	214.92	4	73.7	1358700000	1564600000	4217300000	4042200000	42	49	53	67
P48147	PREP	Prolyl endopeptidase	69.934	10	35.2	0	100060000	386210000	864780000	7	9	23	48
P48444	ARCN1	Coatomer subunit delta	77.343	6	38.2	639470000	667090000	712310000	737810000	35	48	33	59
P48556	PSMD8	26S proteasome non-ATPase regulatory subunit 8	94.171	16	45.1	393020000	326570000	235920000	286020000	26	14	7	17
P48637	GSS	Glutathione synthetase	29.09	15	59.6	229340000	299800000	306450000	170320000	10	25	13	7
P48643	CCT5	T-complex protein 1 subunit epsilon	323.31	7	48.3	6243600000	5509900000	4930700000	4524900000	187	166	126	150
P48735	IDH2	Isocitrate dehydrogenase [NADP], mitochondrial	323.31	17	50.6	402570000	494610000	10507000000	8378500000	21	26	124	119
P48739	PITPNB	Phosphatidylinositol transfer protein beta isoform	112.83	2	1.5	399490000	955350000	556980000	604640000	12	79	18	33
P49189	ALDH9A1	4-trimethylaminobutyraldehyde dehydrogenase	87.941	3	11.3	519760000	906060000	1304700000	1593900000	17	37	37	55
P49207	RPL34	60S ribosomal protein L34	17.1	4	13.9	2121900000	2096500000	2058200000	1563000000	40	30	22	18
P49257	LMAN1	Protein ERGIC-53	291.6	22	58.2	408570000	497390000	1293800000	5082500000	16	9	34	78
P49321	NASP	Nuclear autoantigenic sperm protein	323.31	8	36	1547500000	1091500000	4836000000	1847400000	45	43	115	63
P49327	FASN	Fatty acid synthase	323.31	2	19.4	13912000000	12781000000	12106000000	13027000000	482	498	353	427
P49354	FNTA	Protein farnesyltransferase/geranylgeranyltransferase type-1 subunit alpha	12.018	2	9.1	0	82090000	87731000	67685000	6	5	9	7
P49368	CCT3	T-complex protein 1 subunit gamma	323.31	22	49.5	7136500000	6999000000	4942800000	5835200000	206	200	110	138
P49406	MRPL19	Mitochondrial ribosomal protein L19	8.6201	10	32.9	43770000	75187000	70792000	0	6	6	7	8
P49411	TUFM	Elongation factor Tu, mitochondrial	323.31	17	61.5	5725600000	6992600000	14351000000	14760000000	129	169	180	230
P49419	ALDH7A1	Alpha-aminoadipic semialdehyde dehydrogenase	258.87	10	43.8	937760000	797520000	1456900000	3739000000	17	14	25	88
P49458	SRP9	Signal recognition particle 9 kDa protein	80.117	21	59.3	678840000	506270000	1427900000	1462100000	32	25	19	26
P49588	AARS	Alanine--tRNA ligase, cytoplasmic	323.31	5	41	3240200000	3318000000	1653300000	1983700000	183	160	56	86
P49589	CARS	Cysteine--tRNA ligase, cytoplasmic	31.955	7	40.9	198040000	170420000	127380000	120310000	17	6	6	19
P49591	SARS	Serine--tRNA ligase, cytoplasmic	171.87	2	8	646530000	718180000	754540000	891850000	28	28	36	48
P49720	PSMB3	Proteasome subunit beta type-3	54.408	3	9.6	894480000	682180000	282990000	417500000	30	27	6	14
P49721	PSMB2	Proteasome subunit beta type-2	64.956	1	28.5	887370000	821990000	516560000	438240000	40	32	11	18
P49736	MCM2	DNA replication licensing factor MCM2	251.12	8	35.4	1644100000	1473900000	2751700000	2393800000	87	62	88	99
P49748	ACADVL	Very long-chain specific acyl-CoA dehydrogenase, mitochondrial	323.31	22	69.3	1213300000	2214500000	1158900000	1405400000	70	138	47	78
P49755	TMED10	Transmembrane emp24 domain-containing protein 10	121.48	22	30	1392700000	879530000	1882100000	2801900000	29	27	34	55
P49756	RBM25	RNA-binding protein 25	78.668	13	69.7	172850000	335060000	405650000	589680000	10	21	21	43
P49773	HINT1	Histidine triad nucleotide-binding protein 1	188.94	3	41.7	3220800000	1997300000	2705800000	5465600000	67	68	28	69
P49792	RANBP2	E3 SUMO-protein ligase RanBP2	99.861	9	8.7	98409000	63270000	158000000	718260000	18	20	14	70
P49821	NDUFV1	NADH dehydrogenase [ubiquinone] flavoprotein 1, mitochondrial	97.924	2	4.9	224990000	467630000	903360000	535170000	19	33	45	39
P49915	GMPS	GMP synthase [glutamine-hydrolyzing]	323.31	8	19.4	2070800000	1972300000	4480100000	1759300000	95	98	146	95
P50213	IDH3A	Isocitrate dehydrogenase [NAD] subunit alpha, mitochondrial	95.733	33	46.6	759650000	599170000	687150000	738690000	30	27	34	41
P50395	GDI2	Rab GDP dissociation inhibitor beta	323.31	3	10	7309400000	4877000000	6142500000	4243000000	179	138	116	119
P50402	EMD	Emerin	118.65	2	12.1	403030000	564320000	531450000	513330000	34	29	28	26
P50454	SERPINH1	Serpin H1	143.07	29	71.3	1916500000	1984500000	825450000	344420000	74	80	18	11
P50502	ST13	Hsc70-interacting protein	141.77	12	52.6	1151700000	1430300000	896810000	1609600000	35	41	18	38
P50552	VASP	Vasodilator-stimulated phosphoprotein	35.459	12	58.2	765220000	255380000	227780000	0	28	6	9	7
P50570	DNM2	Dynamin-2	204.05	1	5.1	325120000	505340000	885980000	1076600000	8	23	47	79
P50579	METAP2	Methionine aminopeptidase 2	75.088	12	66.5	681610000	680890000	461620000	360690000	44	20	7	13
P50914	RPL14	60S ribosomal protein L14	97.356	6	3.4	2378700000	1925100000	2037100000	1853100000	37	46	31	35
P50990	CCT8	T-complex protein 1 subunit theta	323.31	8	33.6	6341500000	5087200000	5101700000	5171700000	216	170	99	138
P50991	CCT4	T-complex protein 1 subunit delta	323.31	9	32.7	5788100000	4400500000	3678100000	3634400000	144	127	80	90
P50995	ANXA11	Annexin A11	74.29	13	21.5	1528600000	1347100000	1144900000	594910000	44	56	30	19
P51114	FXR1	Fragile X mental retardation syndrome-related protein 1	52.22	28	43	460310000	654710000	560450000	822690000	20	30	18	40
P51148	RAB5C	Ras-related protein Rab-5C	167.01	18	56.9	1280900000	1121300000	1166700000	1251400000	50	48	32	51
P51149	RAB7A	Ras-related protein Rab-7a	253.66	8	32.5	1385800000	2079700000	2265200000	1868400000	49	69	69	60
P51398	DAP3	28S ribosomal protein S29, mitochondrial	80.651	16	51	201110000	121130000	357090000	400630000	13	12	30	38
P51570	GALK1	Galactokinase	121.03	81	63.1	292310000	317970000	597150000	289860000	13	27	34	16
P51571	SSR4	Translocon-associated protein subunit delta	27.311	4	12.9	573640000	565580000	513680000	782010000	21	40	17	24
P51572	BCAP31	B-cell receptor-associated protein 31	34.901	10	16.7	894990000	798190000	575750000	725190000	25	33	9	25
P51610	HCFC1	Host cell factor 1	161.52	1	3.2	71498000	0	546690000	979680000	9	17	35	56
P51659	HSD17B4	Peroxisomal multifunctional enzyme type 2	323.31	1	43.8	676250000	291830000	2732800000	3399500000	27	12	92	120
P51665	PSMD7	26S proteasome non-ATPase regulatory subunit 7	169.87	3	13.1	1019100000	1009600000	938630000	903140000	37	43	29	34
P51858	HDGF	Hepatoma-derived growth factor	323.31	10	28.3	1545200000	2074700000	1516600000	1077100000	54	67	44	36
P51970	NDUFA8	NADH dehydrogenase [ubiquinone] 1 alpha subcomplex subunit 8	28.693	8	13.8	324800000	435080000	647310000	520320000	15	16	20	16
P51991	HNRNPA3	Heterogeneous nuclear ribonucleoprotein A3	323.31	21	43.2	6889400000	5050900000	15039000000	12263000000	131	105	157	139
P52209	PGD	6-phosphogluconate dehydrogenase, decarboxylating	323.31	6	27.4	21179000000	1624600000	3350600000	2207700000	328	61	56	62
P52272	HNRNPM	Heterogeneous nuclear ribonucleoprotein M	323.31	1	4	7520900000	7590700000	15130000000	21421000000	184	179	205	260
P52292	KPNA2	Importin subunit alpha-1	323.31	7	27.7	3321800000	2175800000	1892700000	4092000000	106	77	49	117
P52565	ARHGDIA	Rho GDP-dissociation inhibitor 1	323.31	2	5.5	3677600000	3118900000	4508800000	2728100000	68	60	47	39
P52597	HNRNPF	Heterogeneous nuclear ribonucleoprotein F	323.31	4	6.9	3269600000	3670300000	3930500000	3760600000	89	100	71	98
P52701	MSH6	DNA mismatch repair protein Msh6	249.41	7	60.5	547670000	133760000	1685100000	970550000	36	17	101	50
P52788	SMS	Spermine synthase	270.67	20	44.3	378040000	1020500000	851930000	285430000	18	61	38	13
P52815	MRPL12	39S ribosomal protein L12, mitochondrial	107.34	16	37.5	895270000	687650000	1765100000	1165700000	44	31	28	21
P52888	THOP1	Thimet oligopeptidase	28.432	103	59.6	123890000	313000000	257960000	316210000	9	42	9	31
P52907	CAPZA1	F-actin-capping protein subunit alpha-1	232.12	1	4.3	1001100000	913550000	1425000000	391480000	30	41	36	19
P52943	CRIP2	Cysteine rich protein 2	262.88	30	62.2	920750000	1598100000	3537500000	2353700000	21	44	54	49
P53007	SLC25A1	Tricarboxylate transport protein, mitochondrial	96.954	4	9.9	468720000	709310000	546900000	986090000	10	32	18	40
P53396	ACLY	ATP-citrate synthase	323.31	8	28.1	13675000000	6090600000	7214600000	9445800000	351	202	182	237
P53597	SUCLG1	Succinate--CoA ligase [ADP/GDP-forming] subunit alpha, mitochondrial	50.094	13	21.7	306840000	338810000	497080000	476040000	15	14	21	20
P53618	COPB1	Coatomer subunit beta	136.48	19	48.8	998990000	958470000	740390000	1266500000	54	55	17	79
P53621	COPA	Coatomer subunit alpha	225.47	1	5.7	1975000000	1996700000	1772200000	1867700000	101	134	87	131
P53999	SUB1	Activated RNA polymerase II transcriptional coactivator p15	92.954	14	25.9	1195900000	1338800000	2870400000	2056400000	57	43	33	38
P54136	RARS	Arginine--tRNA ligase, cytoplasmic	138.32	5	18.8	1856000000	1901300000	1514400000	1531400000	112	105	34	75
P54577	YARS	Tyrosine--tRNA ligase, cytoplasmic	109.81	17	52.2	898900000	944220000	928820000	870520000	50	73	41	56
P54578	USP14	Ubiquitin carboxyl-terminal hydrolase 14	323.31	7	23.4	1004100000	770580000	1085300000	2106600000	43	51	37	116
P54727	RAD23B	UV excision repair protein RAD23 homolog B	323.31	16	33.6	1365000000	2172500000	1503500000	1603100000	49	83	30	61
P54819	AK2	Adenylate kinase 2, mitochondrial	105.86	2	44	889180000	1110400000	964560000	758290000	47	49	44	48
P54886	ALDH18A1	Delta-1-pyrroline-5-carboxylate synthase	134.47	12	39.3	443960000	474640000	701210000	521870000	26	25	45	33
P54920	NAPA	Alpha-soluble NSF attachment protein	263.1	5	67.5	535870000	186640000	1366800000	1020700000	23	17	79	62
P55010	EIF5	Eukaryotic translation initiation factor 5	88.529	5	17.4	1140300000	1680500000	883420000	1026000000	47	55	34	44
P55036	PSMD4	26S proteasome non-ATPase regulatory subunit 4	56.615	9	45.7	532530000	345990000	472620000	407180000	23	16	21	12
P55060	CSE1L	Exportin-2	323.31	2	7.8	17071000000	17486000000	13287000000	8585200000	127	110	67	76
P55072	VCP	Transitional endoplasmic reticulum ATPase	323.31	3	19.4	14140000000	12178000000	15383000000	14391000000	349	307	266	256
P55084	HADHB	hydroxyacyl-CoA dehydrogenase trifunctional multienzyme complex subunit beta	196.22	10	29.8	1840900000	1539000000	2315600000	1092500000	85	73	95	45
P55145	MANF	Mesencephalic astrocyte-derived neurotrophic factor	29.742	1	4.2	0	669480000	1739800000	1842900000	8	21	54	58
P55209	NAP1L1	Nucleosome assembly protein 1-like 1	323.31	16	38.7	6143800000	3490200000	7640700000	4533700000	108	78	94	82
P55265	ADAR	Double-stranded RNA-specific adenosine deaminase	139.86	3	25.2	559320000	645660000	563290000	654400000	26	58	28	49
P55327	TPD52	Tumor protein D52	322.83	4	19.6	542650000	947470000	851410000	696260000	27	30	39	53
P55735	SEC13	Protein SEC13 homolog	289.99	2	4.6	479610000	469070000	467550000	508550000	31	36	16	30
P55769	NHP2L1	NHP2-like protein 1	78.514	3	16.3	766370000	780590000	1503800000	1049200000	20	27	33	32
P55786	NPEPPS	Puromycin-sensitive aminopeptidase	323.31	5	24.7	1959900000	2584800000	1621000000	2291500000	83	143	49	110
P55795	HNRNPH2	Heterogeneous nuclear ribonucleoprotein H2	137.46	38	71.9	335120000	448170000	845910000	869690000	15	23	30	29
P55884	EIF3B	Eukaryotic translation initiation factor 3 subunit B	323.31	17	35.2	2911000000	4426200000	2047500000	2190600000	139	187	45	97
P55957	BID	BH3-interacting domain death agonist	122.49	12	24.8	164220000	0	222130000	48450000	13	10	15	10
P56134	ATP5J2	ATP synthase subunit f, mitochondrial	57.222	6	17.1	367570000	370870000	531920000	807680000	14	23	11	19
P56192	MARS	Methionine--tRNA ligase, cytoplasmic	323.31	10	37.2	966340000	690380000	1164100000	1319200000	44	27	49	94
P56385	ATP5I	ATP synthase subunit e, mitochondrial	12.222	6	27.5	242290000	279650000	399900000	657200000	20	16	8	33
P56537	EIF6	Eukaryotic translation initiation factor 6	268.64	10	48.2	1843200000	2268100000	944310000	1057000000	30	49	24	35
P56545	CTBP2	C-terminal-binding protein 2	16.247	6	37	257180000	245410000	334150000	318780000	17	10	11	14
P58546	MTPN	Myotrophin	183	3	17.3	834740000	1163800000	1142800000	482000000	22	26	17	21
P59998	ARPC4	Actin-related protein 2/3 complex subunit 4	35.145	2	3.1	836910000	979350000	589920000	393430000	33	40	20	14
P60174	TPI1	Triosephosphate isomerase 1	323.31	1	19.2	25581000000	18979000000	34580000000	21722000000	198	183	213	167
P60228	EIF3E	Eukaryotic translation initiation factor 3 subunit E	94.565	4	35.5	1764800000	1502300000	857610000	911720000	81	79	42	42
P60468	SEC61B	Protein transport protein Sec61 subunit beta	10.797	26	52.4	129960000	142120000	129860000	217560000	9	8	5	6
P60660	MYL6	Myosin light polypeptide 6	323.31	4	25	1863500000	4042500000	1279300000	983470000	28	36	22	15
P60842	EIF4A1	Eukaryotic initiation factor 4A-I	323.31	1	2.3	15425000000	18278000000	12616000000	9246900000	216	253	146	141
P60866	RPS20	Ribosomal protein S20	98.002	8	72	3264600000	2928100000	2824400000	2184900000	53	50	33	32
P60891	PRPS1	Ribose-phosphate pyrophosphokinase 1	117.29	11	78.4	1530400000	1928700000	2336800000	3675400000	54	52	66	74
P60900	PSMA6	Proteasome subunit alpha type-6	152.84	1	6.5	1886800000	1565300000	1150600000	969990000	71	56	29	26
P60953	CDC42	Cell division control protein 42 homolog	104.75	13	59.8	1292300000	1344400000	1040500000	1293500000	51	48	31	53
P60981	DSTN	Destrin	273.53	1	11.4	3166700000	2558900000	1122400000	1893300000	81	64	19	58
P60983	GMFB	Glia maturation factor beta	128.29	28	33.6	330980000	328010000	557620000	360150000	18	11	31	31
P61011	SRP54	Signal recognition particle 54 kDa protein	92.215	13	68.3	342510000	335290000	577250000	339400000	14	9	30	31
P61019	RAB2A	Ras-related protein Rab-2A	323.31	12	21	1056400000	680270000	1174000000	3017300000	41	25	38	80
P61026	RAB10	Ras-related protein Rab-10	19.693	3	22.7	1668700000	618910000	562570000	560290000	35	8	9	13
P62837	UBE2D2	Ubiquitin-conjugating enzyme E2 D2	26.799	5	77.4	402980000	291110000	418550000	301360000	10	7	19	16
P61081	UBE2M	NEDD8-conjugating enzyme Ubc12	16.435	12	69.6	409620000	710230000	625360000	488360000	16	19	17	18
P61088	UBE2N	Ubiquitin-conjugating enzyme E2 N	99.328	8	69.2	1230100000	969450000	2094700000	1760600000	42	38	48	47
P61106	RAB14	Ras-related protein Rab-14	199.34	19	15.8	831480000	793660000	575070000	1363700000	34	47	17	63
P61158	ACTR3	Actin-related protein 3	323.31	14	56.4	2504200000	2916800000	2083300000	1335100000	106	131	58	51
P61160	ACTR2	Actin-related protein 2	228.86	12	48.2	1671800000	1895600000	1312200000	889890000	48	56	30	33
P61163	ACTR1A	Alpha-centractin	230.64	10	23.4	1138400000	1492900000	1098800000	1046200000	62	86	41	56
P61201	COPS2	COP9 signalosome complex subunit 2	18.575	2	10.7	99455000	98626000	114730000	114470000	7	11	10	10
P84077	ARF1	ADP-ribosylation factor 1	87.53	2	11.9	1179800000	1084900000	774240000	1094400000	34	34	17	17
P61221	ABCE1	ATP-binding cassette sub-family E member 1	211.43	52	53.3	1221900000	1217700000	1314700000	865440000	51	77	43	31
P61224	RAP1B	Ras-related protein Rap-1b	147.55	11	49.5	687320000	779350000	1033100000	902270000	23	33	53	54
P61247	RPS3A	40S ribosomal protein S3a	323.31	1	3.2	10358000000	8415300000	8559200000	6270500000	166	125	91	88
P61254	RPL26	Ribosomal protein L26	105.61	24	35.6	3015200000	2750700000	2957600000	2054500000	46	36	39	37
P61289	PSME3	Proteasome activator complex subunit 3	182.43	46	55.3	1088900000	1053400000	713670000	624730000	61	61	40	42
P61313	RPL15	Ribosomal protein L15	87.053	14	46.7	5536400000	5085600000	3449100000	4342100000	76	80	47	60
P61353	RPL27	60S ribosomal protein L27	239.34	1	12.1	4326300000	3764000000	4954200000	2666500000	80	74	38	34
P61513	RPL37A	Ribosomal protein L37a	96.957	1	3.7	1406500000	1312700000	1551000000	1130400000	25	34	31	27
P61586	RHOA	Transforming protein RhoA	137.46	1	6.1	2161200000	2073400000	2720100000	2177200000	58	55	62	64
P61604	HSPE1	10 kDa heat shock protein, mitochondrial	228.71	2	6.4	9728200000	8613000000	10931000000	9340700000	93	93	77	78
P61758	VBP1	Prefoldin subunit 3	181.73	12	17.7	458860000	714140000	575510000	281270000	16	32	21	15
P61916	NPC2	Epididymal secretory protein E1	44.904	36	58.5	193030000	607430000	340120000	115610000	7	24	13	6
P61923	COPZ1	Coatomer subunit zeta-1	44.717	1	3.3	402890000	390940000	308040000	365170000	20	15	6	12
P61956	SUMO2	Small ubiquitin-related modifier 2	68.044	1	2.5	974660000	529440000	725870000	870490000	9	15	10	15
P61970	NUTF2	Nuclear transport factor 2	174.32	8	33.5	1395800000	1760900000	918110000	755780000	31	46	20	24
P61978	HNRNPK	Heterogeneous nuclear ribonucleoprotein K	323.31	1	5.2	15129000000	13304000000	20910000000	29498000000	242	226	239	349
P61981	YWHAG	14-3-3 protein gamma	323.31	4	22.9	5625300000	8412900000	3760600000	6833200000	84	79	40	81
P62081	RPS7	40S ribosomal protein S7	293.5	1	3	7180900000	6021300000	5554800000	3924000000	95	79	77	56
P62136	PPP1CA	Serine/threonine-protein phosphatase PP1-alpha catalytic subunit	323.31	2	5	2599000000	3125300000	3344700000	3425400000	99	96	99	122
P62140	PPP1CB	Serine/threonine-protein phosphatase PP1-beta catalytic subunit	25.962	13	74.5	395670000	259720000	431450000	456880000	21	12	16	20
P62191	PSMC1	26S proteasome regulatory subunit 4	300.19	24	37	1436700000	2416300000	1594200000	1228500000	42	98	45	42
P62195	PSMC5	26S proteasome regulatory subunit 8	251.14	14	77.6	1726500000	1413400000	2125800000	1566500000	73	65	60	56
P62241	RPS8	Ribosomal protein S8	323.31	14	36.9	8578600000	7613300000	6489400000	5890600000	99	93	74	73
P62244	RPS15A	Ribosomal protein S15a	143.02	4	6.1	3813600000	3002600000	2928900000	2493900000	84	87	38	35
P62249	RPS16	Ribosomal protein S16	55.407	9	36.9	5137900000	4079800000	3803500000	3294100000	95	104	28	42
P62258	YWHAE	14-3-3 protein epsilon	323.31	58	72.5	11442000000	10333000000	11509000000	8888700000	179	155	140	126
P62263	RPS14	Ribosomal protein S14	241.04	2	6.2	4560100000	4091700000	3728800000	2979000000	71	82	52	56
P62266	RPS23	40S ribosomal protein S23	92.274	3	22.7	2753200000	2273200000	1780900000	1728100000	72	49	23	42
P62269	RPS18	40S ribosomal protein S18	137.84	22	57	4578300000	3594300000	3238300000	2786400000	67	57	38	35
P62277	RPS13	Ribosomal protein S13	171.14	6	4.6	5706700000	4482600000	2641000000	3787400000	93	84	28	55
P62280	RPS11	Ribosomal protein S11	271.95	17	54.5	7209000000	4883900000	5157000000	4032700000	93	78	63	60
P62304	SNRPE	Small nuclear ribonucleoprotein E	107.38	13	39.8	993300000	827820000	946110000	1026800000	23	24	20	28
P62306	SNRPF	Small nuclear ribonucleoprotein F	53.498	24	29.2	369130000	371660000	583480000	653850000	11	14	10	10
P62314	SNRPD1	Small nuclear ribonucleoprotein Sm D1	66.807	2	8.8	1084500000	1327100000	1383100000	2560100000	24	20	28	28
P62316	SNRPD2	Small nuclear ribonucleoprotein Sm D2	185.8	12	65.2	1359300000	1433000000	2235800000	2324200000	13	18	36	44
P62318	SNRPD3	Small nuclear ribonucleoprotein Sm D3	240.2	8	40.7	1233000000	1298600000	2559200000	2086700000	31	35	35	40
P62328	TMSB4X	Thymosin beta-4	323.31	7	46.9	5975600000	6439700000	2675800000	4195600000	73	62	37	45
P62333	PSMC6	26S proteasome regulatory subunit 10B	251.32	4	29.8	1584100000	1322500000	1564400000	1386200000	81	70	45	67
P62424	RPL7A	Ribosomal protein L7a	323.31	38	58.4	8603000000	7345300000	7332800000	6762200000	136	110	100	89
P62495	ETF1	Eukaryotic peptide chain release factor subunit 1	84.531	5	42.1	708360000	674040000	648620000	489110000	43	32	27	26
P62633	CNBP	Cellular nucleic acid-binding protein	41.56	4	41.5	700740000	950180000	1119000000	416910000	18	31	25	14
P62701	RPS4X	Ribosomal protein S4, X-linked	189.81	3	13.8	9596200000	7748700000	7518600000	6673000000	151	132	92	101
P62750	RPL23A	60S ribosomal protein L23a	139.33	3	10.2	3804600000	3508600000	3616700000	2455900000	58	54	35	36
P62753	RPS6	40S ribosomal protein S6	206.29	31	50.1	3792800000	3046300000	3730900000	2510200000	71	69	32	35
P62805	HIST1H4F	Histone cluster 1 H4 family member f	323.31	5	15.3	76508000000	52597000000	199590000000	194380000000	214	170	258	342
P62826	RAN	GTP-binding nuclear protein Ran	323.31	3	45.1	10487000000	6923600000	9829100000	10289000000	123	98	72	94
P62829	RPL23	Ribosomal protein L23	105.19	5	62.3	5294400000	5086900000	4685600000	3698200000	59	66	52	44
P62841	RPS15	Ribosomal protein S15	98.569	6	29.7	1816200000	1311800000	958410000	827030000	24	29	17	16
P62847	RPS24	40S ribosomal protein S24	178.74	3	18.8	1982700000	1866100000	1443200000	1623700000	44	49	30	41
P62851	RPS25	Ribosomal protein S25	67.702	3	6	2852500000	2179800000	2129700000	1867000000	34	33	27	16
P62854	RPS26	Ribosomal protein S26	84.292	5	23.9	3431200000	2812500000	2676000000	2483400000	58	63	39	35
P62857	RPS28	Ribosomal protein S28	45.939	2	14.5	1662800000	1645500000	1445500000	760100000	27	25	22	17
P62861	FAU	Ubiquitin-like protein FUBI	9.2058	1	17.5	930640000	732440000	672500000	347760000	17	16	10	6
P62879	GNB2	Guanine nucleotide-binding protein G(I)/G(S)/G(T) subunit beta-2	323.31	1	4.1	1745800000	3616300000	3675300000	6035800000	41	106	62	111
P62888	RPL30	Ribosomal protein L30	197.66	11	24.9	3353000000	3247500000	3033700000	2419700000	55	60	30	24
P62899	RPL31	Ribosomal protein L31	60.524	5	69	2619100000	2398500000	1905100000	1525500000	47	41	11	22
P62906	RPL10A	60S ribosomal protein L10a	200.56	6	43.5	5131000000	4280700000	3543000000	3568400000	64	52	36	42
P62910	RPL32	Ribosomal protein L32	188.26	1	21.7	4775000000	4558800000	4606700000	3484400000	75	72	54	48
P62913	RPL11	60S ribosomal protein L11	216.97	2	16.5	3158800000	2975200000	3381600000	1859000000	46	46	36	28
P62917	RPL8	60S ribosomal protein L8	293.97	1	17.6	5873700000	5598400000	4475300000	4449300000	90	108	74	73
P62937	PPIA	Peptidyl-prolyl cis-trans isomerase A	323.31	21	79.7	21427000000	29070000000	37096000000	30304000000	123	133	133	124
P62942	FKBP1A	Peptidyl-prolyl cis-trans isomerase FKBP1A	94.165	18	49	1772300000	2180300000	1694700000	576130000	30	34	30	16
P62979	RPS27A	Ubiquitin-40S ribosomal protein S27a	323.31	2	27.1	13340000000	11542000000	13076000000	11071000000	101	101	109	82
P62993	GRB2	Growth factor receptor-bound protein 2	41.078	7	44	270660000	218780000	322780000	203520000	26	11	20	26
P62995	TRA2B	Transformer-2 protein homolog beta	205.4	5	35.9	1019700000	1028600000	2182400000	2692000000	35	35	51	60
P63000	RAC1	Ras-related C3 botulinum toxin substrate 1	32.993	1	21.5	1332200000	1710700000	1396900000	1782200000	43	49	25	41
P63010	AP2B1	AP-2 complex subunit beta	209.4	3	27.9	1242600000	1303100000	1014300000	1209700000	89	67	39	98
P63092	GNAS	Guanine nucleotide-binding protein G(s) subunit alpha isoforms XLas	78.427	1	86.9	389500000	399870000	504290000	752230000	13	16	22	54
P63096	GNAI1	Guanine nucleotide-binding protein G(i) subunit alpha-1	323.31	18	78.6	495320000	1019900000	991660000	1867800000	21	38	24	71
P63104	YWHAZ	14-3-3 protein zeta/delta	323.31	11	56.3	17878000000	26933000000	15496000000	20836000000	189	206	147	173
P63151	PPP2R2A	Serine/threonine-protein phosphatase 2A 55 kDa regulatory subunit B alpha isoform	112.65	6	58.5	493320000	423830000	773280000	611470000	19	21	35	47
P63167	DYNLL1	Dynein light chain 1, cytoplasmic	323.31	5	55.7	1664000000	1512000000	2272700000	2278600000	29	26	30	25
P63172	DYNLT1	Dynein light chain Tctex-type 1	50.4	8	57.1	138580000	134370000	171790000	162600000	9	9	12	10
P63173	RPL38	Ribosomal protein L38	165.79	10	62.4	2565600000	1835700000	1162600000	1779400000	40	45	7	29
P63208	SKP1	S-phase kinase-associated protein 1	44.312	9	75.4	726360000	523830000	558940000	648360000	31	21	12	27
P63220	RPS21	Ribosomal protein S21	323.31	2	11.7	1725800000	1628300000	1070500000	895690000	34	36	20	15
P63241	EIF5A	Eukaryotic translation initiation factor 5A-1	323.31	12	34.5	9703300000	10199000000	8558300000	3278000000	121	141	98	56
P63244	GNB2L1	Receptor of activated protein C kinase 1	323.31	7	70.8	13120000000	10492000000	8864100000	7860500000	169	136	123	114
P63261	ACTG1	Actin, cytoplasmic 2	323.31	3	65.8	166310000000	168020000000	117400000000	118230000000	368	423	318	280
P63279	UBE2I	SUMO-conjugating enzyme UBC9	94.797	1	3.4	782270000	687850000	695280000	927780000	28	15	11	31
P63313	TMSB10	Thymosin beta-10	178.12	2	23.8	1913600000	1401400000	676160000	483280000	16	19	13	6
P67775	PPP2CA	Serine/threonine-protein phosphatase 2A catalytic subunit alpha isoform	245.45	7	36.1	1402400000	1508600000	2247900000	2276200000	48	51	52	70
P67809	YBX1	Nuclease-sensitive element-binding protein 1	323.31	7	51.5	3394700000	3752300000	3423100000	2656300000	87	94	62	76
P67870	CSNK2B	Casein kinase II subunit beta	73.6	17	71.6	432470000	503130000	739200000	697470000	7	14	15	29
P67936	TPM4	Tropomyosin alpha-4 chain	323.31	20	74.4	8936900000	10853000000	5262700000	2497000000	139	165	91	41
P68032	ACTC1	Actin, alpha cardiac muscle 1	258.36	13	40.1	1421800000	1827900000	382370000	271330000	20	18	8	6
P68036	UBE2L3	Ubiquitin-conjugating enzyme E2L 3	164.87	6	51.9	1160700000	2042300000	1255800000	1195100000	47	74	36	33
P68104	EEF1A1	Elongation factor 1-alpha 1	323.31	1	10.1	58292000000	64413000000	41745000000	65172000000	563	630	450	593
P68363	TUBA1B	Tubulin alpha-1B chain	323.31	7	24.2	47317000000	58830000000	76904000000	78699000000	346	401	411	477
P68366	TUBA4A	Tubulin alpha-4A chain	221.4	6	65.2	1465200000	1439700000	1516800000	834150000	37	41	33	24
P68371	TUBB4B	Tubulin beta-4B chain	323.31	20	44.6	35768000000	40527000000	76174000000	60413000000	318	356	652	524
P68400	CSNK2A1	Casein kinase II subunit alpha	148.04	5	60.9	1260000000	1314800000	1256000000	1822400000	55	45	39	60
P68402	PAFAH1B2	Platelet-activating factor acetylhydrolase IB subunit beta	156.47	4	67.8	644340000	678640000	1037800000	875150000	24	26	32	21
P69849	NOMO3	Nodal modulator 3	97.722	2	40.7	0	362900000	383880000	350490000	8	19	32	44
P78344	EIF4G2	Eukaryotic translation initiation factor 4 gamma 2	160.16	7	64.4	629320000	570630000	444540000	459600000	67	32	30	58
P78347	GTF2I	General transcription factor II-I	261.7	5	79.8	809610000	1041200000	1041000000	1778700000	36	70	47	111
P78371	CCT2	T-complex protein 1 subunit beta	323.31	11	79.4	8112800000	6498000000	6960800000	5300400000	189	160	170	147
P78406	RAE1	mRNA export factor	21.836	8	21	147170000	176180000	177990000	166430000	11	8	8	27
P78417	GSTO1	Glutathione S-transferase omega-1	106.19	9	41.6	1840700000	1922600000	381810000	909970000	54	59	8	37
P78527	PRKDC	DNA-dependent protein kinase catalytic subunit	323.31	20	43.4	9587800000	3006400000	12780000000	22659000000	445	118	492	829
P80723	BASP1	Brain abundant membrane attached signal protein 1	323.31	3	68.2	5180400000	5078200000	7814100000	1375600000	96	90	93	44
P82650	MRPS22	Mitochondrial ribosomal protein S22	38.941	7	29.6	126530000	116920000	201400000	121840000	14	8	19	10
P82930	MRPS34	28S ribosomal protein S34, mitochondrial	22.31	5	73.9	190490000	145210000	259970000	183760000	17	9	15	18
P82933	MRPS9	Mitochondrial ribosomal protein S9	106.75	20	57	169890000	85283000	333150000	344250000	11	14	25	28
P82979	SARNP	SAP domain-containing ribonucleoprotein	118.62	12	58.7	281860000	321640000	723120000	774820000	18	18	18	24
P83731	RPL24	Ribosomal protein L24	95.033	11	57.5	2594400000	2320800000	1129300000	1836200000	42	41	12	40
P84085	ARF5	ADP-ribosylation factor 5	261.4	21	77.6	1482600000	1924700000	963220000	1435000000	36	85	33	74
P84090	ERH	Enhancer of rudimentary homolog	323.31	12	70.2	909470000	966480000	1368000000	2245100000	22	16	20	19
P84098	RPL19	Ribosomal protein L19	116.76	12	46.1	2650700000	2370400000	2030400000	1784400000	53	39	35	26
P84103	SRSF3	Serine/arginine-rich splicing factor 3	112.99	13	50.3	1517600000	1422800000	3078200000	3989000000	32	25	33	31
P84243	H3F3B	H3 histone, family 3B (H3.3B)	323.31	16	65.8	45796000000	32852000000	98589000000	96605000000	84	78	153	116
P98179	RBM3	RNA-binding protein 3	186.52	3	40.2	1072400000	1194700000	434280000	552610000	32	36	9	18
P99999	CYCS	Cytochrome c	294.79	4	54.6	1914300000	3725800000	3539300000	2491900000	38	64	55	45
Q00059	TFAM	Transcription factor A, mitochondrial	33.752	6	54.8	466010000	455730000	682600000	665590000	16	35	31	36
Q00325	SLC25A3	Phosphate carrier protein, mitochondrial	186.05	7	60.6	2476700000	1552400000	2751800000	7184900000	53	43	37	78
Q00341	HDLBP	Vigilin	120.99	18	59.4	989270000	921510000	834810000	634540000	56	64	39	41
Q00610	CLTC	Clathrin heavy chain 1	323.31	3	31.1	20151000000	13699000000	17571000000	23663000000	553	438	406	532
Q00688	FKBP3	Peptidyl-prolyl cis-trans isomerase FKBP3	226.4	12	35.7	1634500000	1246300000	2463600000	1781800000	62	37	58	39
Q00796	SORD	Sorbitol dehydrogenase	39.627	13	65	377360000	318630000	530570000	358200000	15	12	23	14
Q00839	HNRNPU	Heterogeneous nuclear ribonucleoprotein U	323.31	5	68.3	14503000000	11628000000	27976000000	35609000000	247	222	310	402
Q01082	SPTBN1	Spectrin beta chain, non-erythrocytic 1	323.31	17	62.5	7505400000	8442600000	3486900000	4786900000	383	428	84	235
Q01085	TIAL1	Nucleolysin TIAR	34.312	11	60	250260000	266540000	330470000	297070000	21	15	9	16
Q01105	SET	Protein SET	323.31	4	40.7	4053400000	4814700000	2919500000	6093200000	57	88	24	76
Q01130	SRSF2	Serine/arginine-rich splicing factor 2	141.76	6	36.1	808010000	872820000	1305500000	1446200000	17	19	15	18
Q01469	FABP5	Fatty acid-binding protein, epidermal	323.31	3	36.2	3083900000	4283800000	1399400000	2263500000	77	85	33	46
Q01518	CAP1	Adenylyl cyclase-associated protein 1	323.31	9	58.2	3648900000	3417400000	3041200000	1448600000	104	104	65	46
Q01581	HMGCS1	Hydroxymethylglutaryl-CoA synthase, cytoplasmic	78.58	3	74.6	517280000	790510000	476210000	778840000	29	49	26	57
Q01813	PFKP	ATP-dependent 6-phosphofructokinase, platelet type	323.31	1	19.6	8032200000	4100700000	2210400000	1334700000	217	133	58	30
Q01844	EWSR1	RNA-binding protein EWS	173.85	8	52.8	810210000	769960000	1272800000	1450700000	32	31	28	41
Q02218	OGDH	2-oxoglutarate dehydrogenase, mitochondrial	323.31	11	71.5	235030000	1328300000	2872000000	2615400000	5	46	127	135
Q02543	RPL18A	Ribosomal protein L18a	190.81	22	44.9	3857000000	3274300000	2707000000	3162000000	95	80	46	46
Q02750	MAP2K1	Dual specificity mitogen-activated protein kinase kinase 1	87.878	1	34.5	444390000	650880000	587810000	793770000	15	17	25	58
Q02790	FKBP4	Peptidyl-prolyl cis-trans isomerase FKBP4	323.31	14	48.2	4747200000	3938200000	5846400000	3429900000	176	129	128	79
Q02818	NUCB1	Nucleobindin-1	55.754	4	45.3	312950000	281770000	711820000	408020000	31	5	48	19
Q02878	RPL6	60S ribosomal protein L6	323.31	20	75.9	6490600000	5519100000	6355400000	4769000000	122	103	92	95
Q02880	TOP2B	DNA topoisomerase 2-beta	43.92	12	42.7	225520000	86595000	619540000	523720000	21	8	37	39
Q02978	SLC25A11	Mitochondrial 2-oxoglutarate/malate carrier protein	165.48	3	64	589570000	440300000	750490000	734890000	33	28	34	49
Q03252	LMNB2	Lamin-B2	256.63	5	79.4	809150000	1694100000	2504600000	3322800000	34	60	84	112
Q03701	CEBPZ	CCAAT/enhancer-binding protein zeta	31.033	6	63.9	154940000	101450000	181920000	139160000	10	5	15	25
Q04637	EIF4G1	Eukaryotic translation initiation factor 4 gamma 1	323.31	1	13.7	1742100000	2475000000	1954600000	1349400000	112	154	75	69
Q04760	GLO1	Lactoylglutathione lyase	68.113	3	63.6	822990000	1245400000	2814100000	191190000	33	51	44	7
Q04837	SSBP1	Single-stranded DNA-binding protein, mitochondrial	323.31	3	11.2	1337800000	2853000000	2257200000	3584400000	35	61	45	71
Q04917	YWHAH	14-3-3 protein eta	246.84	7	45.1	854350000	2233000000	763910000	2072100000	23	74	18	47
Q05519	SRSF11	Serine/arginine-rich splicing factor 11	47.435	1	75.7	0	0	565720000	453220000	6	5	29	17
Q05639	EEF1A2	Elongation factor 1-alpha 2	323.31	16	56	1686800000	12365000000	6713100000	2127800000	32	170	86	55
Q06210	GFPT1	Glutamine--fructose-6-phosphate aminotransferase [isomerizing] 1	129.84	6	39.6	536860000	534240000	773270000	434760000	44	47	62	45
Q06323	PSME1	Proteasome activator complex subunit 1	78.736	2	9.3	1486300000	2273200000	1420400000	278070000	50	80	33	5
Q06830	PRDX1	Peroxiredoxin-1	323.31	10	39.1	36070000000	15525000000	16852000000	18515000000	250	165	139	131
Q07020	RPL18	60S ribosomal protein L18	163.13	15	61.8	6186700000	4946800000	6113900000	5266200000	53	59	50	62
Q07021	C1QBP	Complement component 1 Q subcomponent-binding protein, mitochondrial	137.07	194	51.3	1662100000	1212000000	2783400000	1778300000	56	43	49	39
Q07065	CKAP4	Cytoskeleton-associated protein 4	323.31	9	46	1651900000	497230000	5134200000	6337300000	73	12	117	154
Q07666	KHDRBS1	KH domain-containing, RNA-binding, signal transduction-associated protein 1	137.02	4	16.8	952300000	730570000	2329000000	2258200000	31	29	49	56
Q07812	BAX	Apoptosis regulator BAX	107.96	1	54.1	178350000	141730000	248140000	258300000	19	14	11	20
Q07866	KLC1	Kinesin light chain 1	120.04	15	88.1	340310000	207950000	826050000	1058700000	9	10	26	54
Q07955	SRSF1	Serine/arginine-rich splicing factor 1	260.75	1	4.4	2727500000	2384200000	4337100000	4935900000	77	54	92	119
Q07960	ARHGAP1	Rho GTPase-activating protein 1	82.596	13	46.4	610760000	608830000	426290000	348160000	28	31	21	15
Q08211	DHX9	ATP-dependent RNA helicase A	323.31	5	68.9	8073100000	5876400000	12269000000	16695000000	251	206	244	335
Q08945	SSRP1	FACT complex subunit SSRP1	323.31	6	31.8	1722400000	1415500000	3614700000	3510200000	62	65	105	125
Q08J23	NSUN2	tRNA (cytosine(34)-C(5))-methyltransferase	181.6	7	81.1	671040000	835830000	1600100000	590650000	43	71	81	34
Q09028	RBBP4	Histone-binding protein RBBP4	323.31	7	53.8	796160000	1012100000	1895000000	2474100000	19	17	32	69
Q09161	NCBP1	Nuclear cap-binding protein subunit 1	117.62	6	51.8	362230000	220830000	296420000	1093700000	12	16	9	73
Q12765	SCRN1	Secernin-1	85.391	11	38	284430000	468490000	1157700000	1016700000	10	13	46	38
Q12788	TBL3	Transducin beta-like protein 3	35.5	5	24.8	140450000	191670000	309220000	179930000	6	21	23	13
Q12797	ASPH	Aspartyl/asparaginyl beta-hydroxylase	323.31	2	11.7	1801500000	382750000	403720000	277220000	105	16	13	16
Q12849	GRSF1	G-rich sequence factor 1	97.673	3	18	512690000	588150000	687060000	342510000	29	29	43	21
Q12874	SF3A3	Splicing factor 3A subunit 3	190.42	76	68.6	542260000	587130000	921240000	772590000	33	40	39	52
Q12904	AIMP1	Aminoacyl tRNA synthase complex-interacting multifunctional protein 1	86.823	6	21.2	726360000	840340000	784890000	770930000	42	52	29	31
Q12905	ILF2	Interleukin enhancer-binding factor 2	323.31	13	50.1	2205500000	1890700000	2721600000	3703600000	86	65	92	116
Q12906	ILF3	Interleukin enhancer-binding factor 3	323.31	48	56.7	3726200000	3679500000	7550300000	8192100000	130	127	145	197
Q12907	LMAN2	Vesicular integral-membrane protein VIP36	98.855	91	58.5	299000000	0	316210000	724540000	6	7	5	31
Q12931	TRAP1	Heat shock protein 75 kDa, mitochondrial	323.31	3	9.4	2513300000	2821100000	4304700000	5322300000	94	99	102	158
Q13057	COASY	Bifunctional coenzyme A synthase	136.02	5	9.9	184160000	247400000	0	714630000	16	14	5	57
Q13098	GPS1	COP9 signalosome complex subunit 1	25.464	7	16	132680000	195830000	247560000	171340000	16	20	5	6
Q13148	TARDBP	TAR DNA-binding protein 43	323.31	2	6	1159100000	979230000	2108700000	2153700000	53	41	59	63
Q13151	HNRNPA0	Heterogeneous nuclear ribonucleoprotein A0	323.31	3	14.3	1905800000	1751500000	3803700000	5024300000	53	43	90	108
Q13155	AIMP2	Aminoacyl tRNA synthase complex-interacting multifunctional protein 2	83.758	13	48.9	503070000	731500000	442340000	597180000	22	38	16	31
Q13162	PRDX4	Peroxiredoxin-4	278.3	30	74.1	2377400000	1968100000	4408500000	4312200000	80	63	81	90
Q13177	PAK2	Serine/threonine-protein kinase PAK 2	200.62	14	27	145460000	1805100000	1728400000	993490000	8	102	55	45
Q13185	CBX3	Chromobox protein homolog 3	323.31	20	56.8	2142700000	4197600000	3355400000	4376000000	34	75	51	67
Q13200	PSMD2	26S proteasome non-ATPase regulatory subunit 2	323.31	18	46.5	2490600000	4079500000	1935600000	1852300000	108	196	53	71
Q13242	SRSF9	Serine/arginine-rich splicing factor 9	58.526	12	41.4	479630000	273670000	981400000	2101900000	18	8	30	62
Q13243	SRSF5	Serine/arginine-rich splicing factor 5	26.524	39	8	470800000	565280000	749590000	709770000	11	14	19	20
Q13247	SRSF6	Serine/arginine-rich splicing factor 6	7.5279	7	41	377290000	416160000	385360000	545280000	10	13	12	9
Q13263	TRIM28	Transcription intermediary factor 1-beta	323.31	18	40.8	5582900000	14483000000	14657000000	12075000000	134	308	206	208
Q13283	G3BP1	Ras GTPase-activating protein-binding protein 1	283.83	10	12	2900800000	3413300000	2176000000	2834700000	86	117	37	69
Q13310	PABPC4	Polyadenylate-binding protein 4	75.085	7	45.5	580260000	679350000	618820000	352630000	28	34	21	11
Q13347	EIF3I	Eukaryotic translation initiation factor 3 subunit I	323.31	1	3.4	1128400000	1921700000	1491000000	1060200000	56	84	47	57
Q13404	UBE2V1	Ubiquitin-conjugating enzyme E2 variant 1	23.346	18	63	571150000	528460000	573520000	372240000	21	20	13	13
Q13405	MRPL49	Mitochondrial ribosomal protein L49	50.897	1	9.9	124980000	105450000	223990000	191350000	9	7	15	13
Q13409	DYNC1I2	Cytoplasmic dynein 1 intermediate chain 2	171.44	7	26.5	612800000	600020000	631510000	353060000	29	31	28	14
Q13428	TCOF1	Treacle protein	57.604	2	1.9	405470000	443580000	581790000	521430000	24	32	28	38
Q13435	SF3B2	Splicing factor 3B subunit 2	323.31	5	15.3	1338500000	1269100000	2010700000	1704500000	73	64	84	83
Q13442	PDAP1	28 kDa heat- and acid-stable phosphoprotein	37.877	13	72.4	576730000	885180000	434740000	412820000	28	46	13	11
Q13509	ENSG00000258947	Tubulin beta-3 chain	323.31	2	5.4	4592600000	9245200000	2394500000	5979700000	117	155	69	94
Q13526	PIN1	Peptidyl-prolyl cis-trans isomerase NIMA-interacting 1	163.59	17	75.9	0	327210000	398080000	547680000	5	8	11	24
Q13561	DCTN2	Dynactin subunit 2	100.28	5	35.9	467060000	692600000	625080000	405790000	30	56	20	15
Q13573	SNW1	SNW domain-containing protein 1	80.946	16	49.2	0	158560000	306030000	272940000	7	13	15	14
Q13813	SPTAN1	Spectrin alpha chain, non-erythrocytic 1	323.31	171	54.8	8092200000	9633000000	4715100000	7604300000	406	470	111	352
Q13838	DDX39B	Spliceosome RNA helicase DDX39B	231.43	9	22.1	1223900000	1047900000	2004500000	1516100000	44	42	51	61
Q14103	HNRNPD	Heterogeneous nuclear ribonucleoprotein D0	323.31	5	15.3	5128100000	5984000000	15894000000	10540000000	111	108	147	105
Q14137	BOP1	Ribosome biogenesis protein BOP1	106.99	3	7.6	217670000	219800000	243050000	193840000	23	12	12	23
Q14152	EIF3A	Eukaryotic translation initiation factor 3 subunit A	276.57	5	51.5	3773700000	3960700000	2617000000	2275500000	173	167	81	70
Q14157	UBAP2L	Ubiquitin-associated protein 2-like	270.97	3	7.2	333820000	316650000	746950000	332390000	13	25	40	35
Q14165	MLEC	Malectin	123.18	2	9.4	207280000	0	268330000	487610000	15	6	17	29
Q14166	TTLL12	Tubulin--tyrosine ligase-like protein 12	223.71	9	19.4	0	1696900000	853830000	726950000	5	101	36	33
Q14204	DYNC1H1	Cytoplasmic dynein 1 heavy chain 1	323.31	1	5.7	8127500000	8485300000	8226300000	5675800000	472	506	347	307
Q14232	EIF2B1	Translation initiation factor eIF-2B subunit alpha	27.452	5	8.9	125660000	149870000	135050000	217540000	5	10	9	22
Q14247	CTTN	Src substrate cortactin	323.31	3	7.2	2080400000	3077000000	1418100000	807570000	77	104	20	17
Q14258	TRIM25	E3 ubiquitin/ISG15 ligase TRIM25	178.03	4	21.5	319260000	766520000	281440000	416890000	22	70	9	24
Q14320	FAM50A	Protein FAM50A	9.7369	3	32.7	142500000	203950000	238520000	123530000	6	8	11	5
Q14444	CAPRIN1	Caprin-1	290.02	11	33.3	1401900000	1020400000	1099700000	1621900000	48	43	25	41
Q14498	RBM39	RNA-binding protein 39	278.78	1	4.7	473350000	431300000	759090000	799200000	30	22	41	50
Q14566	MCM6	DNA replication licensing factor MCM6	323.31	35	68	1705400000	1593800000	2507700000	2172300000	84	71	106	112
Q14683	SMC1A	Structural maintenance of chromosomes protein 1A	323.31	5	24.8	243030000	173690000	1152900000	2195600000	10	9	69	122
Q14694	USP10	Ubiquitin carboxyl-terminal hydrolase 10	23.187	5	34.9	0	129420000	63216000	68569000	5	14	8	5
Q14697	GANAB	Neutral alpha-glucosidase AB	323.31	2	6.2	6781900000	4066000000	14947000000	26229000000	162	105	234	405
Q14738	PPP2R5D	Serine/threonine-protein phosphatase 2A 56 kDa regulatory subunit delta isoform	56.537	37	41.3	253550000	243160000	363310000	573080000	7	9	13	51
Q14839	CHD4	Chromodomain-helicase-DNA-binding protein 4	323.31	3	3.5	601980000	909890000	3559200000	3208400000	29	29	132	192
Q14974	KPNB1	Importin subunit beta-1	323.31	10	68.2	7130400000	4849400000	7948900000	7861200000	238	189	229	229
Q14978	NOLC1	Nucleolar and coiled-body phosphoprotein 1	63.458	7	23.8	1088900000	1596500000	905380000	809550000	55	62	20	40
Q15008	PSMD6	Proteasome 26S subunit, non-ATPase 6	54.927	10	38.7	723500000	763120000	740250000	634030000	48	61	18	35
Q15019	43710	Septin-2	323.31	1	6.7	2051000000	2266700000	2655800000	2537900000	81	68	46	65
Q15021	NCAPD2	Condensin complex subunit 1	57.924	10	26.3	284390000	0	115130000	172470000	32	12	10	27
Q15029	EFTUD2	116 kDa U5 small nuclear ribonucleoprotein component	323.31	10	26.8	8675900000	7936000000	9486800000	11948000000	120	112	112	225
Q15046	KARS	Lysine--tRNA ligase	323.31	6	10.9	2197800000	3842200000	1510900000	1428100000	98	156	45	63
Q15056	EIF4H	Eukaryotic translation initiation factor 4H	144.96	5	17.4	1464900000	3128600000	973240000	826830000	31	62	24	22
Q15084	PDIA6	Protein disulfide-isomerase A6	323.31	9	11.4	5254500000	3701700000	10159000000	5085300000	114	99	144	107
Q15102	PAFAH1B3	Platelet-activating factor acetylhydrolase IB subunit gamma	323.31	12	29.4	2439200000	894970000	4198800000	4021100000	52	13	52	92
Q15181	PPA1	Pyrophosphatase 1	323.31	2	3.2	3176400000	5176600000	2082100000	2803800000	112	165	33	91
Q15185	PTGES3	Prostaglandin E synthase 3	323.31	45	33.7	2667700000	4125800000	3350700000	4011600000	30	43	29	40
Q15233	NONO	Non-POU domain-containing octamer-binding protein	323.31	4	34.3	6482000000	5738700000	13763000000	14282000000	138	130	154	184
Q15269	PWP2	Periodic tryptophan protein 2 homolog	22.294	19	45.9	0	95698000	126700000	0	8	15	15	13
Q15287	RNPS1	RNA-binding protein with serine-rich domain 1	77.783	1	0.9	365680000	348330000	722990000	249380000	15	26	31	13
Q15293	RCN1	Reticulocalbin-1	286.63	2	5	1217600000	1738100000	1873600000	2265100000	26	59	26	81
Q15363	TMED2	Transmembrane emp24 domain-containing protein 2	65.464	18	25.7	548420000	526740000	880860000	1166700000	9	10	17	35
Q15365	PCBP1	Poly(rC)-binding protein 1	323.31	13	29	7068400000	5375600000	5978200000	5045300000	110	85	86	87
Q15366	PCBP2	Poly(rC)-binding protein 2	323.31	1	1.1	4395800000	5882500000	5791600000	5792800000	87	82	83	76
Q15369	TCEB1	Elongin-C	229.42	3	6.9	882160000	1085400000	1077900000	1129600000	28	28	29	38
Q15370	TCEB2	Elongin-B	121.6	2	2.6	887710000	876420000	1109500000	947120000	22	42	21	33
Q15388	TOMM20	Mitochondrial import receptor subunit TOM20 homolog	10.916	52	41	200790000	0	266760000	364440000	6	9	7	13
Q15393	SF3B3	Splicing factor 3B subunit 3	323.31	16	24.8	2605600000	2640300000	2681600000	2455100000	128	154	87	150
Q15397	KIAA0020	Pumilio homolog 3	163.8	18	18.7	438100000	276170000	605930000	402980000	18	11	44	42
Q15417	CNN3	Calponin-3	279.42	8	40.4	250940000	561020000	2541700000	299690000	18	25	47	15
Q15424	SAFB	Scaffold attachment factor B1	323.31	2	3.8	450770000	539400000	1269800000	1936800000	16	15	33	75
Q15427	SF3B4	Splicing factor 3B subunit 4	50.281	2	6	370110000	364290000	387390000	378500000	17	17	14	24
Q15428	SF3A2	Splicing factor 3A subunit 2	22.483	6	35.1	279050000	289180000	386440000	422420000	13	16	11	22
Q15436	SEC23A	Protein transport protein Sec23A	80.931	25	78.4	373330000	292740000	409540000	219700000	26	41	13	27
Q15437	SEC23B	Protein transport protein Sec23B	71.064	3	16.5	0	263340000	169170000	242510000	9	17	5	31
Q15459	SF3A1	Splicing factor 3A subunit 1	248.57	2	1.8	1014200000	1069400000	1422700000	1235100000	53	74	61	66
Q15631	TSN	Translin	73.505	4	9.9	491020000	514510000	452080000	648430000	30	24	24	30
Q15637	SF1	Splicing factor 1	89.884	7	10.7	943350000	849780000	1137000000	1045800000	39	37	49	45
Q15645	TRIP13	Pachytene checkpoint protein 2 homolog	28.437	1	5.7	189780000	128150000	152450000	88261000	22	8	24	11
Q15691	MAPRE1	Microtubule-associated protein RP/EB family member 1	323.31	18	40.8	1769600000	1881700000	2612100000	1210800000	60	68	65	47
Q15717	ELAVL1	ELAV-like protein 1	209.48	5	23.3	842190000	954750000	1734000000	2001000000	31	32	59	41
Q15758	SLC1A5	Neutral amino acid transporter B(0)	84.242	1	2.1	468800000	228350000	244730000	138250000	35	13	14	9
Q15843	NEDD8	NEDD8	51.532	6	4.5	887420000	655300000	1342800000	698810000	16	22	17	16
Q15907	RAB11B	Ras-related protein Rab-11B	107.76	8	7.2	1416300000	1033800000	1180000000	1376500000	45	42	26	41
Q16181	43715	Septin-7	154.8	15	11.8	1221500000	1527100000	2080700000	1609100000	49	74	53	57
Q16186	ADRM1	Proteasomal ubiquitin receptor ADRM1	140.21	7	9	275270000	338240000	252290000	188920000	16	18	20	11
Q16401	PSMD5	26S proteasome non-ATPase regulatory subunit 5	53.918	52	68	269890000	237440000	179210000	164600000	30	31	5	13
Q16531	DDB1	DNA damage-binding protein 1	243.32	37	53.5	1492700000	1446600000	1453300000	3313300000	63	83	62	137
Q16543	CDC37	Hsp90 co-chaperone Cdc37	204.08	1	21.8	770500000	1752800000	1897700000	757720000	35	75	59	22
Q16555	DPYSL2	Dihydropyrimidinase-related protein 2	323.31	3	7.2	3512700000	1383100000	5102500000	3316500000	135	32	126	121
Q16576	RBBP7	Histone-binding protein RBBP7	323.31	4	16.1	2244100000	1390800000	4414700000	3819900000	78	42	58	87
Q16629	SRSF7	Serine/arginine-rich splicing factor 7	169.69	76	51.7	1192600000	1102000000	2181500000	2647500000	48	35	51	43
Q16630	CPSF6	Cleavage and polyadenylation specificity factor subunit 6	323.31	8	7.6	428970000	371280000	905530000	878850000	25	21	28	38
Q16643	DBN1	Drebrin	323.31	6	13.6	470980000	889590000	3115700000	2582200000	15	51	85	70
Q16658	FSCN1	Fascin	323.31	6	28.6	5679800000	11046000000	9638300000	7812700000	105	210	117	126
Q16777	HIST2H2AC	Histone H2A type 2-C	323.31	1	2.6	53469000000	35697000000	127800000000	122270000000	119	101	222	222
Q16836	HADH	Hydroxyacyl-coenzyme A dehydrogenase, mitochondrial	323.31	4	13.3	813640000	1769200000	4252200000	5703300000	19	34	93	107
Q16851	UGP2	UTP--glucose-1-phosphate uridylyltransferase	44.775	9	22.4	293200000	349710000	265390000	106980000	15	24	13	6
Q16881	TXNRD1	Thioredoxin reductase 1, cytoplasmic	323.31	1	0.7	9297300000	3030200000	3051400000	4206600000	224	116	62	120
Q16891	IMMT	MICOS complex subunit MIC60	323.31	12	82.7	1857300000	1859800000	2693400000	2838200000	89	73	75	102
Q1KMD3	HNRNPUL2	Heterogeneous nuclear ribonucleoprotein U like 2	323.31	9	77.7	959740000	759330000	1509800000	5252500000	27	31	56	147
Q27J81	INF2	Inverted formin-2	181.69	3	16.5	701440000	868220000	195590000	133530000	39	74	15	6
Q2NL82	TSR1	Pre-rRNA-processing protein TSR1 homolog	29.179	247	60.2	0	287530000	222530000	0	11	18	14	5
Q2TAY7	SMU1	WD40 repeat-containing protein SMU1	93.644	6	36.2	574910000	412340000	641180000	782830000	26	24	32	41
Q3ZCM7	TUBB8	Tubulin beta-8 chain	323.31	8	11	8082900000	7823900000	22963000000	12586000000	45	48	45	45
Q4KWH8	PLCH1	1-phosphatidylinositol 4,5-bisphosphate phosphodiesterase eta-1	2.0162	4	24.5	0	0	0	385240000	10	6	9	8
Q56VL3	OCIAD2	OCIA domain containing 2	105.4	9	45.9	0	383960000	452730000	672260000	8	25	18	30
Q58FF8	HSP90AB2P	Putative heat shock protein HSP 90-beta 2	292.05	10	59.2	1594300000	1123100000	456810000	1211800000	40	32	21	21
Q5JTV8	TOR1AIP1	Torsin-1A-interacting protein 1	31.369	2	15.2	0	132870000	383560000	244480000	13	14	24	15
Q6DKI1	RPL7L1	Ribosomal protein L7 like 1	20.227	35	53.6	295780000	262770000	176870000	160660000	16	20	11	22
Q6P2E9	EDC4	Enhancer of mRNA-decapping protein 4	89.506	14	53.2	239130000	449330000	241780000	221350000	6	40	5	24
Q6P2Q9	PRPF8	Pre-mRNA-processing-splicing factor 8	323.31	13	45.3	2144400000	1743100000	2089400000	2502500000	143	92	115	216
Q6P587	FAHD1	Acylpyruvase FAHD1, mitochondrial	76.182	2	8.8	191500000	290930000	181340000	339060000	9	17	10	20
Q6PI48	DARS2	Aspartate--tRNA ligase, mitochondrial	95.11	15	36.4	491520000	588760000	733850000	1065300000	15	33	28	76
Q6PKG0	LARP1	La-related protein 1	86.74	15	12.4	568340000	584360000	295660000	402110000	49	30	14	42
Q6Y7W6	GIGYF2	GRB10-interacting GYF protein 2	23.696	7	6.3	0	109650000	42234000	0	5	9	5	5
Q71U36	TUBA1A	Tubulin alpha-1A chain	197.47	2	15.4	2100300000	2473900000	6700900000	6879000000	37	34	81	92
Q7KZF4	SND1	Staphylococcal nuclease domain-containing protein 1	323.31	3	22.8	4121500000	5805900000	3382400000	6860200000	143	226	118	228
Q7L014	DDX46	Probable ATP-dependent RNA helicase DDX46	125.46	3	13.8	655650000	702890000	834500000	803210000	37	31	55	63
Q7L0Y3	TRMT10C	tRNA methyltransferase 10 homolog C	77.657	4	4.9	266620000	447330000	859390000	292200000	11	28	42	21
Q7L1Q6	BZW1	Basic leucine zipper and W2 domain-containing protein 1	145.66	4	12.3	1260200000	965990000	614670000	360200000	62	47	9	18
Q7L2H7	EIF3M	Eukaryotic translation initiation factor 3 subunit M	184.37	3	40.4	1202700000	1134000000	869750000	744570000	40	33	24	34
Q7L576	CYFIP1	Cytoplasmic FMR1-interacting protein 1	32.17	2	4.6	180060000	210900000	118480000	128960000	27	14	12	24
Q7L5N1	COPS6	COP9 signalosome complex subunit 6	6.5696	1	3.3	109440000	87167000	140950000	110560000	6	8	16	9
Q7RTV0	PHF5A	PHD finger-like domain-containing protein 5A	44.037	3	4.5	227310000	185160000	251150000	227430000	12	9	13	16
Q7Z6Z7	HUWE1	E3 ubiquitin-protein ligase HUWE1	323.31	5	57.8	1152100000	1258400000	916660000	1082000000	56	75	53	112
Q7Z739	YTHDF3	YTH domain-containing family protein 3	15.286	10	50.4	122240000	112660000	126680000	126280000	8	6	9	10
Q86U42	PABPN1	Polyadenylate-binding protein 2	178.88	2	41.3	382110000	387980000	734170000	919590000	13	14	31	51
Q86UE4	MTDH	Protein LYRIC	119.57	5	11.4	0	229840000	489410000	356950000	5	5	11	23
Q86UP2	KTN1	Kinectin	323.31	12	17.1	1034800000	1031200000	2177300000	2171500000	42	36	87	152
Q86V81	ALYREF	THO complex subunit 4	323.31	17	19.1	1042500000	880410000	1333800000	1557600000	35	28	40	41
Q86VP6	CAND1	Cullin-associated NEDD8-dissociated protein 1	323.31	4	7.8	2111700000	1177900000	3264300000	1754000000	138	39	145	93
Q86X55	CARM1	Histone-arginine methyltransferase CARM1	9.3325	20	42.9	0	130750000	110380000	128460000	6	9	8	6
Q86XP3	DDX42	ATP-dependent RNA helicase DDX42	80.723	1	3.3	217410000	68762000	310780000	400360000	27	9	24	47
Q86Y39	NDUFA11	NADH dehydrogenase [ubiquinone] 1 alpha subcomplex subunit 11	14.681	2	4.3	0	0	0	132240000	6	6	7	9
Q8IWX8	CHERP	Calcium homeostasis endoplasmic reticulum protein	43.01	1	1.7	196510000	190490000	279620000	359590000	8	5	25	34
Q8IY81	FTSJ3	pre-rRNA processing protein FTSJ3	33.942	1	15	287660000	248250000	326730000	203950000	14	22	16	13
Q8IYB3	SRRM1	Serine/arginine repetitive matrix protein 1	49.921	2	7.6	0	0	149850000	194950000	7	6	16	13
Q8IZL8	PELP1	Proline-, glutamic acid- and leucine-rich protein 1	60.115	4	6.1	62500000	0	64962000	107910000	5	6	11	20
Q8N163	CCAR2	Cell cycle and apoptosis regulator protein 2	323.31	7	18.3	943930000	730970000	1766900000	2136600000	43	27	68	109
Q8N1F7	NUP93	Nuclear pore complex protein Nup93	278.89	14	13.3	552160000	718670000	559890000	630530000	51	68	30	58
Q8N1G4	LRRC47	Leucine-rich repeat-containing protein 47	133.61	9	21	142750000	328370000	880730000	249490000	11	12	53	19
Q8N684	CPSF7	Cleavage and polyadenylation specificity factor subunit 7	80.471	8	48.7	152260000	96807000	497140000	569040000	9	7	32	39
Q8N8S7	ENAH	Protein enabled homolog	45.257	2	7.1	195620000	246950000	236210000	170640000	12	24	7	15
Q8NBS9	TXNDC5	Thioredoxin domain-containing protein 5	163.09	3	5.3	1723300000	1620300000	3440900000	3529100000	57	50	62	89
Q8NC51	SERBP1	Plasminogen activator inhibitor 1 RNA-binding protein	323.31	3	28.1	3637300000	4048400000	5000400000	2841600000	87	112	80	61
Q8NCW5	APOA1BP	NAD(P)H-hydrate epimerase	22.595	5	26.6	278180000	331620000	804480000	418270000	10	16	21	19
Q8NE71	ABCF1	ATP-binding cassette sub-family F member 1	273.12	11	18.2	560580000	639290000	1435900000	1170200000	16	35	74	64
Q8NI36	WDR36	WD repeat-containing protein 36	7.8376	9	32.1	41441000	50243000	42681000	44371000	7	8	5	6
Q8TAQ2	SMARCC2	SWI/SNF complex subunit SMARCC2	173.58	13	15.7	233960000	186630000	768920000	1197700000	6	11	18	49
Q8TAT6	NPLOC4	Nuclear protein localization protein 4 homolog	47.909	10	18.7	161800000	0	214110000	190690000	19	11	16	18
Q8TBC4	UBA3	NEDD8-activating enzyme E1 catalytic subunit	11.297	7	15.9	115030000	102150000	129090000	131660000	5	9	6	8
Q8TCJ2	STT3B	Dolichyl-diphosphooligosaccharide--protein glycosyltransferase subunit STT3B	9.4089	6	7.1	155230000	0	143680000	163370000	9	5	10	14
Q8TCS8	PNPT1	Polyribonucleotide nucleotidyltransferase 1, mitochondrial	48.536	1	4.1	287050000	139450000	415560000	160520000	27	8	31	6
Q8TDN6	BRIX1	Ribosome biogenesis protein BRX1 homolog	36.504	1	2.2	710680000	586000000	869560000	569020000	28	28	40	28
Q8TEQ6	GEMIN5	Gem-associated protein 5	84.418	2	3.8	0	0	120310000	105390000	18	17	8	17
Q8TEX9	IPO4	Importin-4	155.88	26	44.4	1942400000	1600800000	1643300000	641770000	71	48	38	20
Q8WUM4	PDCD6IP	Programmed cell death 6-interacting protein	323.31	2	33.1	1898500000	1671700000	1293900000	757140000	145	112	72	27
Q8WW12	PCNP	PEST proteolytic signal-containing nuclear protein	103.94	1	6.1	162920000	153180000	265340000	103630000	13	14	11	5
Q8WWM7	ATXN2L	Ataxin-2-like protein	71.498	9	16.7	235870000	188230000	284230000	366820000	16	15	19	32
Q8WWY3	PRPF31	U4/U6 small nuclear ribonucleoprotein Prp31	48.245	3	8.9	198140000	319780000	387110000	363830000	22	23	28	31
Q8WXF1	PSPC1	Paraspeckle component 1	171.55	1	2.8	564610000	528790000	1794100000	1035400000	18	18	60	49
Q8WXX5	DNAJC9	DnaJ homolog subfamily C member 9	87.188	9	32.2	453070000	423890000	670080000	282610000	22	27	5	5
Q92499	DDX1	ATP-dependent RNA helicase DDX1	276.89	4	25.2	1698500000	1697200000	1513700000	1713600000	88	87	67	86
Q92522	H1FX	Histone H1x	102.14	1	3.1	509520000	374270000	1920700000	1588400000	21	14	31	22
Q92575	UBXN4	UBX domain-containing protein 4	68.144	2	10	69495000	68718000	0	67847000	5	5	6	9
Q92598	HSPH1	Heat shock protein 105 kDa	323.31	3	13.3	2690700000	2133700000	1897400000	2392500000	128	94	63	111
Q92616	GCN1L1	eIF-2-alpha kinase activator GCN1	209.73	2	7.4	915330000	587710000	837100000	841120000	123	47	82	110
Q92621	NUP205	Nuclear pore complex protein Nup205	96.845	9	25.5	1479600000	2998400000	2194400000	3983600000	13	38	13	42
Q92688	ANP32B	Acidic leucine-rich nuclear phosphoprotein 32 family member B	55.158	6	30.3	1877600000	1793900000	1509900000	2325600000	40	34	22	50
Q92747	ARPC1A	Actin-related protein 2/3 complex subunit 1A	27.125	2	14.8	0	166000000	191110000	197440000	8	14	8	19
Q92769	HDAC2	Histone deacetylase 2	264.7	1	0.5	812100000	900250000	1614100000	1880900000	24	23	59	63
Q92783	STAM	Signal transducing adapter molecule 1	34.6	4	16	0	0	284370000	0	21	16	29	5
Q92804	TAF15	TATA-binding protein-associated factor 2N	100.66	1	0.8	896310000	746920000	1224400000	1401800000	23	23	21	31
Q92841	DDX17	Probable ATP-dependent RNA helicase DDX17	323.31	2	7.8	5047300000	4062500000	7235800000	10909000000	162	121	169	209
Q92879	CELF1	CUGBP Elav-like family member 1	61.169	7	8.7	353270000	252240000	601070000	671270000	15	12	26	36
Q92890	UFD1L	Ubiquitin recognition factor in ER-associated degradation protein 1	104.09	1	34.9	159290000	134710000	129220000	144120000	13	14	9	15
Q92900	UPF1	Regulator of nonsense transcripts 1	84.772	16	27.4	176460000	336690000	1038300000	655660000	21	44	60	60
Q92905	COPS5	COP9 signalosome complex subunit 5	9.6348	8	16.3	0	0	117990000	90204000	7	8	10	11
Q92945	KHSRP	Far upstream element-binding protein 2	323.31	1	9.6	1926800000	2651500000	5372400000	4782900000	56	98	143	144
Q92973	TNPO1	Transportin-1	323.31	8	25.7	1752000000	1140000000	1354300000	1281500000	101	62	59	68
Q92979	EMG1	Ribosomal RNA small subunit methyltransferase NEP1	28.126	1	6.5	148930000	0	333600000	158200000	19	12	22	8
Q93009	USP7	Ubiquitin carboxyl-terminal hydrolase 7	323.31	1	7.3	657410000	638770000	745220000	1407800000	35	24	34	131
Q969H8	C19orf10	Myeloid-derived growth factor	59.961	3	35.5	410420000	633750000	1302500000	1103800000	9	16	17	21
Q969Q0	RPL36AL	Ribosomal protein L36a like	38.022	6	39.2	761770000	649820000	0	508470000	33	13	10	7
Q96A33	CCDC47	Coiled-coil domain containing 47	67.326	6	18.8	206420000	252750000	341240000	494760000	7	10	7	39
Q96A72	MAGOHB	Protein mago nashi homolog 2	95.492	4	63.9	681590000	640910000	1066200000	979900000	25	27	24	29
Q96AC1	FERMT2	Fermitin family homolog 2	68.211	3	44	343670000	391760000	462380000	149850000	29	32	52	5
Q96AE4	FUBP1	Far upstream element-binding protein 1	249.88	7	8	1648500000	994900000	2205800000	1602300000	55	35	69	74
Q96AG4	LRRC59	Leucine-rich repeat-containing protein 59	248.16	2	12.4	3351600000	3006200000	2292400000	4064700000	61	73	38	62
Q96C90	PPP1R14B	Protein phosphatase 1 regulatory subunit 14B	47.005	1	5.8	270700000	429640000	294590000	132480000	10	20	11	7
Q96CS3	FAF2	FAS-associated factor 2	120.13	20	23.4	452630000	317620000	324900000	535280000	19	12	15	45
Q96CT7	CCDC124	Coiled-coil domain-containing protein 124	18.022	2	7.1	206190000	131430000	185610000	231200000	13	15	8	21
Q96CW1	AP2M1	AP-2 complex subunit mu	66.895	2	3.3	429510000	394540000	394650000	581560000	35	28	20	28
Q96DI7	SNRNP40	U5 small nuclear ribonucleoprotein 40 kDa protein	55.926	2	8.4	218810000	212930000	347890000	324390000	6	7	12	17
Q96EK6	GNPNAT1	Glucosamine-phosphate N-acetyltransferase 1	71.727	1	5.7	149660000	305820000	231320000	162670000	7	22	8	13
Q96EL3	MRPL53	Mitochondrial ribosomal protein L53	40.427	7	37.9	182120000	122640000	310350000	195980000	16	7	23	14
Q96EP5	DAZAP1	DAZ-associated protein 1	222.13	1	13.8	833050000	865310000	1730600000	1968800000	34	40	39	57
Q96FW1	OTUB1	Ubiquitin thioesterase OTUB1	153.08	22	14.8	800540000	581850000	752900000	577030000	48	28	27	34
Q96HC4	PDLIM5	PDZ and LIM domain protein 5	17.361	13	23.8	235880000	200300000	166790000	105850000	24	16	11	8
Q96HE7	ERO1L	ERO1-like protein alpha	293.56	31	57.3	843520000	2167600000	1184300000	1542000000	21	91	36	72
Q96HS1	PGAM5	Serine/threonine-protein phosphatase PGAM5, mitochondrial	34.487	4	26.6	288500000	164750000	758120000	1010000000	11	8	23	36
Q96I24	FUBP3	Far upstream element-binding protein 3	114.23	30	36.4	399200000	551170000	635990000	695200000	23	28	22	50
Q96I99	SUCLG2	Succinate--CoA ligase [GDP-forming] subunit beta, mitochondrial	34.117	10	20.8	171430000	180670000	189510000	82473000	16	26	14	7
Q96IU4	ABHD14B	Protein ABHD14B	74.33	9	41.1	0	370050000	367810000	147950000	8	28	15	12
Q96IX5	USMG5	Up-regulated during skeletal muscle growth protein 5	103.47	19	41.4	305930000	289710000	457880000	485100000	7	11	11	15
Q96KP4	CNDP2	Cytosolic non-specific dipeptidase	246.55	2	20.6	920610000	2154200000	412870000	1148300000	36	120	15	65
Q96P70	IPO9	Importin-9	323.31	5	7.2	459570000	390570000	579130000	637540000	20	20	28	42
Q96PK6	RBM14	RNA-binding protein 14	193.19	7	76.1	1432700000	1390200000	1409100000	2755100000	62	53	29	81
Q96PZ0	PUS7	Pseudouridylate synthase 7	39.411	2	13.4	0	0	178550000	0	5	10	20	7
Q96QK1	VPS35	Vacuolar protein sorting-associated protein 35	124.56	2	10.9	625460000	627250000	419130000	356410000	55	59	13	20
Q96RP9	GFM1	Elongation factor G, mitochondrial	89.014	1	1.6	320140000	494010000	728110000	483170000	10	46	51	31
Q99426	TBCB	Tubulin-folding cofactor B	109.75	8	41.2	1246400000	597660000	1385500000	1018500000	30	10	41	24
Q99436	PSMB7	Proteasome subunit beta type-7	181.28	2	13.3	1253800000	1174700000	883590000	783420000	38	49	14	22
Q99459	CDC5L	Cell division cycle 5-like protein	76.463	13	53.1	211870000	454840000	1667400000	775190000	8	15	35	49
Q99460	PSMD1	26S proteasome non-ATPase regulatory subunit 1	267.84	5	48.4	2862000000	2431700000	1898500000	2160300000	111	82	41	69
Q99471	PFDN5	Prefoldin subunit 5	74.84	1	4.8	408180000	541100000	531240000	279930000	28	31	21	9
Q99497	PARK7	Protein/nucleic acid deglycase DJ-1	231.18	2	14.5	4042700000	3949300000	7516200000	2736100000	88	81	87	56
Q99536	VAT1	Synaptic vesicle membrane protein VAT-1 homolog	184.7	4	18.5	1180400000	2555700000	1499200000	1071700000	54	101	33	41
Q99613	EIF3C	Eukaryotic translation initiation factor 3 subunit C	316.04	6	76.7	2016700000	2582100000	1352600000	1230400000	99	132	38	62
Q99615	DNAJC7	DnaJ homolog subfamily C member 7	212.43	11	47.6	745370000	360060000	495350000	377100000	41	33	18	22
Q99623	PHB2	Prohibitin-2	323.31	2	13.4	4387000000	2741400000	9423200000	5049100000	94	67	108	100
Q99714	HSD17B10	3-hydroxyacyl-CoA dehydrogenase type-2	323.31	1	7.4	1616100000	1666100000	5521000000	3983100000	59	62	96	76
Q99729	HNRNPAB	Heterogeneous nuclear ribonucleoprotein A/B	252.84	1	4.6	1917100000	2182100000	3642300000	5845700000	51	54	61	84
Q99733	NAP1L4	Nucleosome assembly protein 1-like 4	323.31	9	28.9	689750000	596850000	791270000	1480100000	25	15	28	63
Q99798	ACO2	Aconitate hydratase, mitochondrial	323.31	3	5.4	577270000	2140800000	1937700000	6173700000	25	89	67	194
Q99829	CPNE1	Copine-1	109.65	2	6.3	317220000	650940000	741210000	354900000	18	38	49	20
Q99832	CCT7	T-complex protein 1 subunit eta	323.31	1	6.2	5939200000	6035600000	4050700000	4312000000	156	161	113	133
Q99848	EBNA1BP2	Probable rRNA-processing protein EBP2	41.488	14	49.8	193660000	123800000	301690000	154890000	10	17	14	9
Q99873	PRMT1	Protein arginine N-methyltransferase 1	241.73	3	5.6	2585300000	1569900000	1658800000	2227800000	96	57	40	76
Q9BPU6	DPYSL5	Dihydropyrimidinase-related protein 5	208.22	3	14.8	9187200000	4708700000	20744000000	21838000000	22	17	62	72
Q9BPW8	NIPSNAP1	Nipsnap homolog 1	88.68	7	51.9	316790000	426070000	613870000	884140000	12	25	19	52
Q9BQ52	ELAC2	Zinc phosphodiesterase ELAC protein 2	54.662	3	8.6	164640000	223810000	142060000	120470000	20	37	6	8
Q9BQA1	WDR77	Methylosome protein 50	31.211	1	0.9	250970000	239380000	256230000	180500000	20	17	6	9
Q9BQG0	MYBBP1A	Myb-binding protein 1A	253.53	2	3.2	979290000	910180000	586790000	219630000	97	72	41	9
Q9BR76	CORO1B	Coronin-1B	200.52	3	4.1	322900000	2036400000	868980000	565430000	8	89	30	26
Q9BRA2	TXNDC17	Thioredoxin domain-containing protein 17	51.48	15	19.7	1041900000	1317300000	459440000	235280000	29	41	27	12
Q9BRJ2	MRPL45	Mitochondrial ribosomal protein L45	28.951	4	7.8	255410000	245750000	595560000	278170000	11	14	21	13
Q9BS26	ERP44	Endoplasmic reticulum resident protein 44	167.24	12	21.9	552720000	864810000	1035400000	1901100000	14	44	28	77
Q9BSH4	TACO1	Translational activator of cytochrome c oxidase 1	27.286	5	9.3	122010000	0	0	131260000	14	6	5	12
Q9BSJ8	ESYT1	Extended synaptotagmin-1	203.79	4	14.3	901680000	1457800000	923190000	871620000	49	115	45	58
Q9BT78	COPS4	COP9 signalosome complex subunit 4	26.528	2	9.4	99435000	0	237150000	147370000	14	9	22	20
Q9BTT0	ANP32E	Acidic leucine-rich nuclear phosphoprotein 32 family member E	126.94	4	9.7	294920000	227210000	955940000	740660000	18	8	16	19
Q9BUJ2	HNRNPUL1	Heterogeneous nuclear ribonucleoprotein U-like protein 1	323.31	7	20.3	3042800000	238340000	1364100000	5029200000	103	11	81	136
Q9BV86	NTMT1	N-terminal Xaa-Pro-Lys N-methyltransferase 1	48.866	31	51	0	71227000	82019000	70495000	8	8	7	6
Q9BVA1	TUBB2B	Tubulin beta-2B chain	323.31	5	37	2371200000	2697600000	9496000000	15298000000	18	24	55	83
Q9BVC6	TMEM109	Transmembrane protein 109	7.1712	9	79.2	198030000	0	0	122960000	8	9	5	5
Q9BVK6	TMED9	Transmembrane emp24 domain-containing protein 9	128.04	3	9	540350000	225570000	552380000	1113800000	16	6	12	27
Q9BW27	NUP85	Nuclear pore complex protein Nup85	46.228	2	26.3	101070000	203440000	105020000	257750000	10	6	7	27
Q9BWD1	ACAT2	Acetyl-CoA acetyltransferase, cytosolic	252.36	17	64.9	259220000	193520000	584410000	3001100000	11	8	19	74
Q9BWF3	RBM4	RNA-binding protein 4	231.77	3	20	480870000	333420000	488130000	714820000	28	12	27	40
Q9BWJ5	SF3B5	Splicing factor 3B subunit 5	27.036	1	0.2	200660000	240270000	170560000	246830000	9	22	9	12
Q9BX68	HINT2	Histidine triad nucleotide-binding protein 2, mitochondrial	215.62	14	50.9	264580000	132010000	534760000	2228900000	18	8	16	45
Q9BXJ9	NAA15	N-alpha-acetyltransferase 15, NatA auxiliary subunit	154.34	9	34.6	521970000	424980000	512670000	351400000	50	31	39	18
Q9BXP5	SRRT	Serrate RNA effector molecule homolog	147.59	1	5.1	655480000	520820000	1108600000	1259200000	18	28	31	76
Q9BY44	EIF2A	Eukaryotic translation initiation factor 2A	36.552	3	18	265310000	280100000	313100000	152080000	22	44	21	13
Q9BYG3	NIFK	Nucleolar protein interacting with the FHA domain of MKI67	78.67	9	10.6	136140000	0	159510000	84068000	13	10	5	10
Q9BZE4	GTPBP4	Nucleolar GTP-binding protein 1	95.577	1	8	920100000	694900000	825360000	974970000	64	45	34	57
Q9BZZ5	API5	Apoptosis inhibitor 5	172.9	3	12.6	561790000	294730000	550290000	738750000	24	10	12	31
Q9C005	DPY30	Protein dpy-30 homolog	88.403	1	7.7	352050000	373240000	479710000	437990000	13	9	10	19
Q9C0C9	UBE2O	(E3-independent) E2 ubiquitin-conjugating enzyme	36.331	2	13	83541000	0	53501000	0	5	6	6	6
Q9GZL7	WDR12	Ribosome biogenesis protein WDR12	70.832	5	9.2	255520000	323380000	386830000	253030000	18	37	21	23
Q9GZR7	DDX24	ATP-dependent RNA helicase DDX24	83.305	6	25.5	281760000	341260000	246190000	301690000	12	35	23	34
Q9GZS3	WDR61	WD repeat-containing protein 61	141.67	1	18.9	210710000	215480000	210770000	234100000	13	7	20	24
Q9GZT3	SLIRP	SRA stem-loop-interacting RNA-binding protein, mitochondrial	52.972	1	5.9	715760000	558330000	891610000	770570000	19	35	22	22
Q9H0A0	NAT10	RNA cytidine acetyltransferase	100.32	5	23.1	420530000	390350000	227060000	276110000	24	24	19	31
Q9H0D6	XRN2	5'-3' exoribonuclease 2	138.07	3	13.8	972420000	430120000	952980000	1295400000	62	23	44	84
Q9H0S4	DDX47	Probable ATP-dependent RNA helicase DDX47	36.871	5	44.6	226710000	170460000	285140000	127310000	21	6	20	6
Q9H0U4	RAB1B	Ras-related protein Rab-1B	323.31	1	4.7	1977900000	1496000000	1554400000	2484600000	59	43	43	67
Q9H2U2	PPA2	Inorganic pyrophosphatase 2, mitochondrial	81.041	2	79.6	117120000	91613000	286480000	406790000	6	5	9	24
Q9H307	PNN	Pinin	80.936	5	27	298850000	207180000	685610000	378520000	25	21	30	26
Q9H3K6	BOLA2B	bolA family member 2B	99.723	7	30.6	764730000	971090000	1265900000	916980000	18	22	17	19
Q9H3N1	TMX1	Thioredoxin-related transmembrane protein 1	80.733	2	5.5	759940000	486010000	1280000000	2539000000	19	16	23	69
Q9H488	POFUT1	GDP-fucose protein O-fucosyltransferase 1	74.226	1	4.7	277250000	253360000	791290000	653600000	9	10	31	40
Q9H4A4	RNPEP	Aminopeptidase B	246.64	1	8.6	1097200000	1209600000	1920500000	859070000	60	83	103	26
Q9H4A6	GOLPH3	Golgi phosphoprotein 3	16.684	4	16.6	0	94440000	83889000	65268000	8	7	15	8
Q9H4M9	EHD1	EH domain-containing protein 1	64.755	6	83.7	877380000	536850000	813000000	312330000	54	40	50	6
Q9H6R4	NOL6	Nucleolar protein 6	23.499	4	15.4	0	148630000	88740000	60406000	5	9	10	11
Q9H773	DCTPP1	dCTP pyrophosphatase 1	72.51	3	11.5	533320000	545190000	283100000	381740000	24	22	6	17
Q9H7B2	RPF2	Ribosome production factor 2 homolog	13.588	9	67	110590000	150960000	118770000	103090000	13	11	5	15
Q9H910	HN1L	Jupiter microtubule associated homolog 2	91.33	3	8.8	1013700000	974180000	625490000	605480000	36	35	21	26
Q9H9B4	SFXN1	Sideroflexin-1	323.31	9	22.6	748320000	600280000	1421500000	2390100000	26	22	45	70
Q9H9J2	MRPL44	39S ribosomal protein L44, mitochondrial	55.897	7	26	0	0	148180000	200710000	8	12	17	15
Q9HAV4	XPO5	Exportin-5	103.58	1	2.3	88328000	139410000	244100000	427320000	6	11	28	49
Q9HAV7	GRPEL1	GrpE protein homolog 1, mitochondrial	31.292	7	12.5	426130000	691030000	608840000	581100000	13	44	16	15
Q9HB07	C12orf10	UPF0160 protein MYG1, mitochondrial	61.423	1	4.1	549270000	612330000	416970000	423830000	24	47	16	13
Q9HB71	CACYBP	Calcyclin-binding protein	323.31	11	23.3	3081700000	2196200000	3452000000	2998800000	85	63	63	63
Q9HC38	GLOD4	Glyoxalase domain containing 4	28.262	2	4.5	810460000	565530000	635010000	401360000	40	38	23	30
Q9HCC0	MCCC2	Methylcrotonoyl-CoA carboxylase beta chain, mitochondrial	44.443	10	43.5	0	315120000	476500000	412140000	7	15	38	33
Q9HDC9	APMAP	Adipocyte plasma membrane-associated protein	203.61	2	18.5	1650000000	1354800000	3096300000	7298500000	39	33	45	123
Q9NP79	VTA1	Vacuolar protein sorting-associated protein VTA1 homolog	81.268	1	7.5	131750000	136190000	202510000	363550000	10	6	11	24
Q9NP97	DYNLRB1	Dynein light chain roadblock-type 1	35.389	28	37.5	248200000	285090000	389960000	0	23	26	14	9
Q9NQC3	RTN4	Reticulon-4	271.4	1	11.8	1914800000	1386600000	1339300000	1869700000	61	49	34	50
Q9NR30	DDX21	Nucleolar RNA helicase 2	323.31	2	14.2	3652300000	3080900000	2698400000	2976000000	139	108	56	89
Q9NR31	SAR1A	GTP-binding protein SAR1a	34.294	12	19.9	281160000	416770000	323100000	243580000	10	18	10	10
Q9NR45	NANS	Sialic acid synthase	115.9	1	14.9	473590000	790530000	686810000	803800000	24	44	18	47
Q9NRX4	PHPT1	14 kDa phosphohistidine phosphatase	104.86	1	1.5	241050000	191890000	0	264190000	18	7	7	11
Q9NS69	TOMM22	Mitochondrial import receptor subunit TOM22 homolog	323.31	2	6.1	326390000	302860000	455030000	815310000	14	29	18	33
Q9NSD9	FARSB	phenylalanyl-tRNA synthetase beta subunit	116.58	6	14.3	935950000	871100000	1136700000	887440000	84	70	41	74
Q9NSE4	IARS2	Isoleucine--tRNA ligase, mitochondrial	115.59	9	68.8	731570000	550560000	1422000000	903130000	42	35	72	83
Q9NTJ3	SMC4	Structural maintenance of chromosomes protein 4	177.01	10	45.4	382690000	284170000	415100000	560520000	36	26	28	66
Q9NTK5	OLA1	Obg-like ATPase 1	79.699	18	36.6	1792800000	1403100000	2492800000	851550000	100	66	81	34
Q9NTZ6	RBM12	RNA-binding protein 12	19.915	3	4.3	180810000	186330000	169310000	210570000	15	12	22	21
Q9NUJ1	ABHD10	Mycophenolic acid acyl-glucuronide esterase, mitochondrial	77.746	4	17	0	202480000	314770000	811200000	5	13	18	37
Q9NUP9	LIN7C	Protein lin-7 homolog C	6.0771	2	11.8	0	0	130520000	0	5	5	5	8
Q9NUQ9	FAM49B	Protein FAM49B	37.5	6	10.5	0	66852000	90072000	82495000	16	5	6	12
Q9NUU7	DDX19A	ATP-dependent RNA helicase DDX19A	140.48	2	2.6	506830000	678240000	620850000	333750000	40	65	31	15
Q9NVA2	43719	Septin-11	139.23	2	10.6	91099000	163970000	1079800000	390520000	8	14	42	23
Q9NVI7	ATAD3A	ATPase family AAA domain-containing protein 3A	323.31	24	33.9	286730000	722980000	1913700000	1149000000	6	26	51	46
Q9NVJ2	ARL8B	ADP-ribosylation factor-like protein 8B	17.924	9	56.2	331960000	459000000	282220000	376420000	24	28	11	11
Q9NVP1	DDX18	ATP-dependent RNA helicase DDX18	29.002	3	20.4	439580000	390090000	474260000	311050000	22	19	24	10
Q9NW13	RBM28	RNA-binding protein 28	36.354	8	28	0	133680000	103770000	50321000	11	10	9	5
Q9NWU5	MRPL22	Mitochondrial ribosomal protein L22	11.248	14	19.5	0	0	85984000	0	6	7	8	8
Q9NX40	OCIAD1	OCIA domain-containing protein 1	19.166	1	1	242850000	135950000	237030000	198950000	15	12	13	16
Q9NX63	CHCHD3	MICOS complex subunit MIC19	62.538	7	33.9	550840000	635550000	614450000	884740000	13	23	16	35
Q9NY12	GAR1	H/ACA ribonucleoprotein complex subunit 1	9.1319	1	2.6	0	270700000	455530000	222910000	8	18	14	8
Q9NY33	DPP3	Dipeptidyl peptidase 3	323.31	6	67.9	397200000	1274900000	364940000	585210000	22	78	12	35
Q9NYF8	BCLAF1	Bcl-2-associated transcription factor 1	56.487	2	2.1	615420000	607400000	1082400000	2716700000	22	24	20	61
Q9NYL9	TMOD3	Tropomodulin-3	83.422	2	13.7	533390000	386290000	427940000	196560000	35	18	6	7
Q9NYU2	UGGT1	UDP-glucose:glycoprotein glucosyltransferase 1	269.12	2	20.1	61808000	126580000	2368400000	1630700000	14	7	112	101
Q9NZ01	TECR	Very-long-chain enoyl-CoA reductase	117.24	2	3.4	347730000	246350000	918060000	1609600000	5	7	24	40
Q9NZL4	HSPBP1	Hsp70-binding protein 1	291.1	9	59.8	726540000	1255100000	273880000	137030000	47	64	15	17
Q9P035	PTPLAD1	Very-long-chain (3R)-3-hydroxyacyl-CoA dehydratase 3	95.957	5	21	635160000	360090000	435200000	917160000	29	8	16	28
Q9P0J0	NDUFA13	NADH dehydrogenase [ubiquinone] 1 alpha subcomplex subunit 13	12.64	1	6.8	164440000	169840000	348420000	203700000	8	9	12	17
Q9P0L0	VAPA	Vesicle-associated membrane protein-associated protein A	149.19	5	63.2	851260000	625520000	652630000	2672500000	24	14	13	64
Q9P258	RCC2	Protein RCC2	181.53	18	21.2	1366600000	1191300000	3317000000	1859700000	52	41	96	66
Q9P287	BCCIP	BRCA2 and CDKN1A-interacting protein	99.257	2	9.1	467580000	433640000	253170000	188500000	22	23	6	11
Q9P2J5	LARS	Leucine--tRNA ligase, cytoplasmic	323.31	6	12.1	1527200000	1585500000	1768100000	2592800000	104	81	96	182
Q9UBB4	ATXN10	Ataxin-10	105.13	7	11.9	214050000	326530000	261040000	807780000	12	22	16	62
Q9UBE0	SAE1	SUMO-activating enzyme subunit 1	201.35	1	2.6	1874400000	399380000	1832400000	1514800000	93	11	63	69
Q9UBI6	GNG12	Guanine nucleotide-binding protein G(I)/G(S)/G(O) subunit gamma-12	8.9639	1	2.1	243690000	0	224170000	196600000	13	6	12	9
Q9UBQ0	VPS29	Vacuolar protein sorting-associated protein 29	47.829	1	6.9	551050000	495970000	359400000	467870000	27	28	15	28
Q9UBQ5	EIF3K	Eukaryotic translation initiation factor 3 subunit K	23.827	1	1.6	303050000	195970000	222900000	177640000	24	25	9	10
Q9UBQ7	GRHPR	Glyoxylate reductase/hydroxypyruvate reductase	92.331	3	7.4	698440000	900580000	634110000	536620000	36	46	18	24
Q9UBT2	UBA2	SUMO-activating enzyme subunit 2	323.31	4	30.1	2179700000	514670000	2592900000	2620100000	106	18	89	89
Q9UBX3	SLC25A10	Mitochondrial dicarboxylate carrier	35.54	2	12.9	0	217980000	236070000	332620000	12	13	11	28
Q9UHB9	SRP68	Signal recognition particle subunit SRP68	211.35	4	6.7	535680000	548290000	725380000	547510000	42	38	37	35
Q9UHD1	CHORDC1	Cysteine and histidine-rich domain-containing protein 1	323.31	8	27.8	1242600000	295450000	647190000	1831000000	57	14	24	57
Q9UHD8	43717	Septin-9	323.31	1	4.2	1705000000	2221700000	2409000000	2030800000	100	89	67	94
Q9UHV9	PFDN2	Prefoldin subunit 2	15.341	20	44.4	514940000	499540000	607590000	312930000	9	20	9	10
Q9UHX1	PUF60	Poly(U)-binding-splicing factor PUF60	160.67	2	8.8	1353000000	918530000	1252400000	1352000000	69	49	56	73
Q9UI30	TRMT112	Multifunctional methyltransferase subunit TRM112-like protein	108.88	5	9.4	483570000	475060000	543400000	469690000	26	27	19	24
Q9UIG0	BAZ1B	Tyrosine-protein kinase BAZ1B	90.436	46	47.8	152290000	151850000	204060000	1453900000	9	11	11	102
Q9UJS0	SLC25A13	Calcium-binding mitochondrial carrier protein Aralar2	226.43	6	27.2	812120000	1176200000	1127000000	4295400000	43	80	41	165
Q9UJU6	DBNL	Drebrin-like protein	210.74	1	11.7	403970000	840900000	763440000	593790000	12	49	34	28
Q9UJZ1	STOML2	Stomatin-like protein 2, mitochondrial	323.31	19	48.3	1094900000	1247500000	2432400000	2530100000	35	42	89	84
Q9UK45	LSM7	U6 snRNA-associated Sm-like protein LSm7	42.331	1	4	176920000	252160000	254630000	130230000	9	6	12	12
Q9UK76	HN1	Jupiter microtubule associated homolog 1	156.51	4	28.3	1845400000	1970500000	1282000000	930170000	39	40	15	22
Q9UKD2	MRTO4	mRNA turnover protein 4 homolog	50.714	2	20.7	750510000	545540000	579670000	574980000	53	26	18	34
Q9UKK9	NUDT5	ADP-sugar pyrophosphatase	93.416	5	26.2	695410000	538770000	1438700000	406230000	23	31	55	25
Q9UKM9	RALY	RNA-binding protein Raly	73.858	10	30.9	825970000	1334200000	2125600000	1897900000	29	39	34	41
Q9UKY7	CDV3	CDV3 homolog	323.31	12	55.8	618180000	1562000000	944760000	365490000	28	59	33	12
Q9UL25	RAB21	Ras-related protein Rab-21	43.37	1	10.1	174000000	249840000	287150000	220710000	21	11	26	12
Q9UL46	PSME2	Proteasome activator complex subunit 2	323.31	7	22.5	1794800000	2569700000	1458900000	482370000	68	79	42	28
Q9ULC4	MCTS1	Malignant T-cell-amplified sequence 1	77.169	6	77.8	611890000	622770000	664110000	665430000	35	47	29	41
Q9ULV4	CORO1C	Coronin-1C	323.31	5	24.8	2777500000	2520800000	2573900000	4776400000	100	78	73	98
Q9UM00	TMCO1	Calcium load-activated calcium channel	15.038	7	14.6	0	132100000	0	76511000	10	14	6	7
Q9UMS4	PRPF19	Pre-mRNA-processing factor 19	271.8	8	9.2	2110000000	2113000000	4412500000	4014100000	69	71	87	95
Q9UMX0	UBQLN1	Ubiquilin-1	306.16	10	28.1	532410000	586570000	549160000	530040000	25	28	24	44
Q9UN86	G3BP2	Ras GTPase-activating protein-binding protein 2	23.149	4	4.9	262120000	270980000	346020000	212980000	23	17	19	13
Q9UNF0	PACSIN2	Protein kinase C and casein kinase substrate in neurons protein 2	75.69	21	76	415970000	494330000	455030000	528650000	28	55	10	33
Q9UNM6	PSMD13	Proteasome 26S subunit, non-ATPase 13	165.68	6	12.9	1266200000	1114700000	766820000	791130000	63	41	31	40
Q9UNS2	COPS3	COP9 signalosome complex subunit 3	96.413	9	50	95102000	0	143740000	134560000	12	14	7	7
Q9UNZ2	NSFL1C	NSFL1 cofactor p47	112.09	4	8.6	647850000	602980000	464200000	197750000	35	36	18	10
Q9UQ35	SRRM2	Serine/arginine repetitive matrix protein 2	192.65	2	13.8	900560000	960620000	857720000	813810000	29	48	29	64
Q9UQ80	PA2G4	Proliferation-associated protein 2G4	323.31	8	32.3	5959100000	9792000000	5923700000	7014600000	130	218	111	151
Q9UQE7	SMC3	Structural maintenance of chromosomes protein 3	240.31	1	16.9	184610000	369660000	1409600000	1454600000	10	8	67	106
Q9Y224	C14orf166	RNA transcription, translation and transport factor protein	106.9	3	7.2	843080000	910320000	595700000	758870000	50	53	26	49
Q9Y230	RUVBL2	RuvB-like 2	323.31	14	23.7	2372600000	2685800000	4801500000	1983400000	91	116	123	85
Q9Y262	EIF3L	Eukaryotic translation initiation factor 3 subunit L	294.5	7	25.9	1902800000	1549200000	739500000	779190000	87	82	26	59
Q9Y265	RUVBL1	RuvB-like 1	323.31	8	21.9	2444200000	3094000000	5859200000	2470900000	84	107	121	65
Q9Y266	NUDC	Nuclear migration protein nudC	32.548	1	7.4	1114000000	969300000	1447100000	786760000	40	32	36	26
Q9Y277	VDAC3	Voltage-dependent anion-selective channel protein 3	251.27	26	50.1	1004200000	472050000	1232300000	3106600000	29	9	20	60
Q9Y281	CFL2	Cofilin-2	85.486	17	38.9	275430000	280480000	433550000	313980000	12	14	20	13
Q9Y285	FARSA	phenylalanyl-tRNA synthetase alpha subunit	275.39	15	56.6	842850000	865720000	1095200000	887150000	47	43	26	60
Q9Y295	DRG1	Developmentally-regulated GTP-binding protein 1	33.77	6	29.2	234370000	167520000	139170000	106880000	20	16	9	7
Q9Y2A7	NCKAP1	Nck-associated protein 1	35.334	4	22.3	109970000	0	137980000	94920000	12	5	10	7
Q9Y2B0	CNPY2	Protein canopy homolog 2	71.493	11	32.1	425030000	748560000	727400000	695850000	13	31	20	16
Q9Y2Q3	GSTK1	Soluble glutathione S-transferases	104.27	7	55.9	278370000	900900000	368020000	494860000	7	52	8	20
Q9Y2R9	MRPS7	Mitochondrial ribosomal protein S7	17.608	8	10.9	166610000	203290000	352780000	330930000	9	8	21	21
Q9Y2S7	POLDIP2	DNA polymerase delta interacting protein 2	20.894	3	10.5	0	86725000	121770000	97293000	13	17	9	18
Q9Y2V2	CARHSP1	Calcium-regulated heat-stable protein 1	99.645	30	28.5	376680000	324440000	1062000000	1221100000	12	11	19	27
Q9Y2W1	THRAP3	Thyroid hormone receptor-associated protein 3	104.12	14	60.4	799450000	610190000	1102600000	898680000	36	32	39	45
Q9Y2X3	NOP58	Nucleolar protein 58	288.94	3	6.3	1305900000	1472000000	2171400000	1596600000	70	71	90	91
Q9Y2Z0	SUGT1	Protein SGT1 homolog	24.758	10	30.6	162510000	152200000	169940000	218380000	15	12	7	14
Q9Y333	LSM2	U6 snRNA-associated Sm-like protein LSm2	50.567	5	11.4	163170000	174260000	134160000	317590000	11	5	7	6
Q9Y383	CGI-74	Putative RNA-binding protein Luc7-like 2	62.003	4	63.1	717130000	730130000	1320800000	1401200000	24	37	40	43
Q9Y394	DHRS7	Dehydrogenase/reductase SDR family member 7	165.1	2	5.3	0	373280000	518580000	3672800000	5	21	17	85
Q9Y3A5	SBDS	Ribosome maturation protein SBDS	79.558	2	5.7	398690000	887110000	557180000	493600000	5	45	20	26
Q9Y3B3	TMED7	Transmembrane emp24 domain-containing protein 7	88.889	10	53.4	400790000	281710000	586750000	832110000	15	7	18	32
Q9Y3B4	SF3B6	Splicing factor 3B subunit 6	29.884	9	29.1	281610000	253640000	438460000	322280000	16	16	16	10
Q9Y3D9	MRPS23	Mitochondrial ribosomal protein S23	20.208	13	70.7	123600000	169920000	248660000	201700000	14	11	11	19
Q9Y3E5	PTRH2	Peptidyl-tRNA hydrolase 2, mitochondrial	26.95	4	21.9	319340000	157510000	295820000	282230000	14	9	15	25
Q9Y3F4	STRAP	Serine-threonine kinase receptor-associated protein	136.84	10	72.9	1054900000	762040000	816820000	658040000	71	48	27	23
Q9Y3I0	RTCB	tRNA-splicing ligase RtcB homolog	176.55	3	2.5	1235400000	1542700000	1196300000	1706300000	63	67	36	79
Q9Y3T9	NOC2L	Nucleolar complex protein 2 homolog	41.261	4	4.6	369430000	338900000	285640000	285260000	24	11	19	10
Q9Y3U8	RPL36	60S ribosomal protein L36	69.073	9	8.4	2303200000	2001300000	1901400000	1344400000	36	39	22	22
Q9Y3Y2	CHTOP	Chromatin target of PRMT1 protein	19.904	28	23.6	0	159570000	323560000	297030000	6	13	23	15
Q9Y490	TLN1	Talin-1	323.31	7	16.6	6421500000	4429800000	7069600000	3820300000	289	194	283	160
Q9Y4L1	HYOU1	Hypoxia up-regulated protein 1	323.31	7	52.3	345380000	1072900000	7878800000	18635000000	13	58	183	329
Q9Y512	SAMM50	Sorting and assembly machinery component 50 homolog	39.007	17	57.4	0	254090000	339600000	437540000	16	21	15	45
Q9Y5B9	SUPT16H	FACT complex subunit SPT16	323.31	9	30.7	2134300000	1811000000	4102300000	4328500000	82	50	147	176
Q9Y5J7	TIMM9	Mitochondrial import inner membrane translocase subunit Tim9	19.192	1	9.1	146850000	199380000	302460000	315440000	6	14	18	20
Q9Y5K5	UCHL5	Ubiquitin carboxyl-terminal hydrolase isozyme L5	52.448	12	16.6	0	141680000	282210000	177640000	10	10	14	17
Q9Y5L4	TIMM13	Mitochondrial import inner membrane translocase subunit Tim13	26.859	5	5.4	249260000	295110000	570170000	437700000	18	12	17	10
Q9Y5S9	RBM8A	RNA-binding protein 8A	62.19	2	14.5	314240000	386360000	713690000	378930000	11	15	9	7
Q9Y5X3	SNX5	Sorting nexin-5	34.975	7	13.4	84372000	0	115850000	83581000	11	12	5	11
Q9Y617	PSAT1	Phosphoserine aminotransferase	82.544	1	7.9	2444500000	1306000000	461570000	1097000000	90	66	11	51
Q9Y678	COPG1	Coatomer subunit gamma-1	200.09	5	58.4	1329500000	1468400000	963710000	1603900000	87	88	40	113
Q9Y696	CLIC4	Chloride intracellular channel protein 4	323.31	15	47.4	326730000	719090000	1485600000	791220000	12	30	39	39
Q9Y6C9	MTCH2	Mitochondrial carrier homolog 2	146.78	1	3.3	484980000	137260000	737540000	1889400000	28	17	30	50
Q9Y6E2	BZW2	Basic leucine zipper and W2 domain-containing protein 2	23.758	7	15.6	0	205360000	145090000	112960000	14	19	8	10
Q9Y6G9	DYNC1LI1	Cytoplasmic dynein 1 light intermediate chain 1	46.201	35	44.3	155590000	122940000	187720000	175770000	14	12	15	18
Q9Y6H1	CHCHD2	Coiled-coil-helix-coiled-coil-helix domain-containing protein 2	103.37	2	2	331960000	592570000	635400000	708150000	15	13	14	15

## Sheet: Table S3
Supplementary Table S3: Differentially expressed proteins in small-cell lung cancer (SCLC) cell lines comparing with non-small-cell lung cancer cell lines (NSCLC)												NSCLC cell lines: H1975, A549 SCLC cell lines: H69, H446
Protein information						LFQ intensities of proteins in four types of cell lines				Protein changes in SCLC
Protein name	Gene ID	Description	Score	Unique peptides	Sequence coverage [%]	A549 cells	H1975 cells	H446 cells	H69 cells	Log2(SCLC/NSCLC ratios)	Changes in SCLC
O00151	PDLIM1	PDZ and LIM domain protein 1	323.31	23	85.5	1561700000	2363200000	711020000	314490000	-1.93631	down-regulated
O75369	FLNB	Filamin-B	323.31	3	14	39370000000	31265000000	1698900000	5805200000	-3.23463	down-regulated
P00338	LDHA	Lactate dehydrogenase A	323.31	21	68.1	50203000000	38542000000	10085000000	16785000000	-1.72367	down-regulated
P04083	ANXA1	Annexin A1	323.31	2	50	35059000000	44013000000	1949700000	3741600000	-3.79634	down-regulated
P04792	HSPB1	Heat shock protein beta-1	323.31	3	22.7	8840400000	55831000000	3560900000	3406500000	-3.21444	down-regulated
P07355	ANXA2	Annexin A2	323.31	11	66.9	102520000000	53254000000	25041000000	24066000000	-1.66545	down-regulated
P07741	APRT	Adenine phosphoribosyltransferase	227.72	15	53.1	1411100000	2980100000	513370000	637900000	-1.93139	down-regulated
P10599	TXN	Thioredoxin	276.43	12	42.9	7768600000	3773200000	1361500000	988780000	-2.29596	down-regulated
P11413	G6PD	Glucose-6-phosphate 1-dehydrogenase	323.31	4	9.7	45107000000	11557000000	3418600000	2067000000	-3.36871	down-regulated
P15121	AKR1B1	Aldose reductase	323.31	20	50.3	21599000000	13130000000	4070600000	2147400000	-2.48162	down-regulated
P18206	VCL	Vinculin	323.31	44	63.6	10202000000	7607300000	2127500000	646260000	-2.68272	down-regulated
P21291	CSRP1	Cysteine and glycine-rich protein 1	285.09	11	52.3	3396700000	1701900000	574020000	304570000	-2.53684	down-regulated
P21333	FLNA	Filamin-A	323.31	4	36.5	51787000000	79719000000	21877000000	13335000000	-1.90099	down-regulated
P29401	TKT	Transketolase	323.31	15	77.4	42810000000	17504000000	6622200000	5721300000	-2.28874	down-regulated
P50454	SERPINH1	Serpin H1	143.07	29	71.3	1916500000	1984500000	825450000	344420000	-1.7375	down-regulated
P63313	TMSB10	Thymosin beta-10	178.12	2	23.8	1913600000	1401400000	676160000	483280000	-1.51558	down-regulated
P68032	ACTC1	Actin, alpha cardiac muscle 1	258.36	13	40.1	1421800000	1827900000	382370000	271330000	-2.31361	down-regulated
P78417	GSTO1	Glutathione S-transferase omega-1	106.19	9	41.6	1840700000	1922600000	381810000	909970000	-1.54264	down-regulated
Q27J81	INF2	Inverted formin-2	181.69	3	16.5	701440000	868220000	195590000	133530000	-2.25377	down-regulated
Q9BRA2	TXNDC17	Thioredoxin domain-containing protein 17	51.48	15	19.7	1041900000	1317300000	459440000	235280000	-1.76379	down-regulated
Q9NZL4	HSPBP1	Hsp70-binding protein 1	291.1	9	59.8	726540000	1255100000	273880000	137030000	-2.2698	down-regulated
O14776	TCERG1	Transcription elongation regulator 1	30.607	1	0	117220000	69342000	367030000	969900000	2.8412	up-regulated
O43175	PHGDH	D-3-phosphoglycerate dehydrogenase	323.31	33	59.4	385550000	455720000	6716000000	3396200000	3.58738	up-regulated
O43390	HNRNPR	Heterogeneous nuclear ribonucleoprotein R	323.31	1	3.8	2708900000	1675000000	7140900000	5984900000	1.58212	up-regulated
O60763	USO1	General vesicular transport factor p115	63.591	4	4.9	0	112720000	236710000	127060000	1.69028	up-regulated
O75367	H2AFY	Core histone macro-H2A.1	323.31	2	5.2	1793600000	1632600000	5543600000	14299000000	2.53392	up-regulated
O75380	NDUFS6	NADH dehydrogenase [ubiquinone] iron-sulfur protein 6, mitochondrial	19.948	5	24	0	115480000	340770000	211500000	2.25773	up-regulated
O75475	PSIP1	PC4 and SFRS1-interacting protein	323.31	15	36.1	619360000	232680000	7198900000	5764800000	3.92741	up-regulated
O75694	NUP155	Nuclear pore complex protein Nup155	156.82	4	63.6	174760000	170400000	411480000	569830000	1.50744	up-regulated
O75947	ATP5H	ATP synthase subunit d, mitochondrial	124.26	10	42.3	987210000	1149600000	3270200000	2874800000	1.52395	up-regulated
O75964	ATP5L	ATP synthase subunit g, mitochondrial	34.564	20	22.8	315570000	233720000	1104500000	1198200000	2.06769	up-regulated
O94906	PRPF6	Pre-mRNA-processing factor 6	118.04	14	20.1	182430000	94012000	521790000	460380000	1.829	up-regulated
O95168	NDUFB4	NADH dehydrogenase [ubiquinone] 1 beta subcomplex subunit 4	13.378	2	3.2	0	0	178310000	176010000	6.64386	up-regulated
O96019	ACTL6A	Actin-like protein 6A	206.73	24	51.6	340710000	593830000	1304300000	910500000	1.24485	up-regulated
P04843	RPN1	Dolichyl-diphosphooligosaccharide--protein glycosyltransferase subunit 1	323.31	8	21.9	3437100000	3415000000	8099900000	7631600000	1.19904	up-regulated
P05026	ATP1B1	Sodium/potassium-transporting ATPase subunit beta-1	69.093	2	1.2	0	0	324590000	1308100000	6.64386	up-regulated
P05204	HMGN2	Non-histone chromosomal protein HMG-17	87.354	4	24	1375900000	2034900000	9965300000	8229300000	2.41533	up-regulated
P06576	ATP5B	ATP synthase subunit beta, mitochondrial	323.31	15	29.2	7637400000	8329900000	23596000000	25244000000	1.61294	up-regulated
P07437	TUBB	Tubulin beta chain	323.31	3	4	8255600000	6521400000	25464000000	16844000000	1.51758	up-regulated
P07954	FH	Fumarate hydratase, mitochondrial	323.31	1	6	1388900000	2730000000	6748500000	8174000000	1.85716	up-regulated
P08237	PFKM	ATP-dependent 6-phosphofructokinase, muscle type	209.72	14	16.2	0	300400000	1538000000	612030000	2.8394	up-regulated
P09874	PARP1	Poly [ADP-ribose] polymerase 1	323.31	29	58.8	3732200000	3854100000	22356000000	15216000000	2.30819	up-regulated
P10515	DLAT	Dihydrolipoamide S-acetyltransferase	215.7	22	52.9	200970000	397330000	2015900000	4213300000	3.38011	up-regulated
P12270	TPR	Nucleoprotein TPR	323.31	44	66.5	635210000	345260000	1318900000	1487800000	1.51733	up-regulated
P14314	PRKCSH	Glucosidase 2 subunit beta	323.31	13	63.6	1848600000	3578700000	7925900000	8881900000	1.63082	up-regulated
P14406	COX7A2	Cytochrome c oxidase subunit 7A2, mitochondrial	42.673	4	45.8	353040000	339740000	1029200000	774700000	1.38065	up-regulated
P14625	HSP90B1	Endoplasmin	323.31	9	86.7	15848000000	9324700000	43405000000	71742000000	2.19354	up-regulated
P14866	HNRNPL	Heterogeneous nuclear ribonucleoprotein L	323.31	8	21	5995600000	4420600000	12001000000	16565000000	1.45547	up-regulated
P16949	STMN1	Stathmin	323.31	6	19.8	1083400000	689330000	10914000000	2223600000	2.88966	up-regulated
P18859	ATP5J	ATP synthase-coupling factor 6, mitochondrial	183.39	2	43.1	331140000	409240000	1023600000	1065700000	1.49668	up-regulated
P19404	NDUFV2	NADH dehydrogenase [ubiquinone] flavoprotein 2, mitochondrial	18.199	7	27.2	156040000	159940000	354400000	312580000	1.07781	up-regulated
P20700	LMNB1	Lamin-B1	323.31	19	43.6	3083500000	2903300000	13582000000	15710000000	2.29065	up-regulated
P21281	ATP6V1B2	V-type proton ATPase subunit B, brain isoform	123.16	2	9.6	411090000	341490000	1045300000	1494900000	1.75503	up-regulated
P22307	SCP2	Non-specific lipid-transfer protein	62.297	6	49.5	226430000	265700000	1099400000	728120000	1.89278	up-regulated
P22626	HNRNPA2B1	Heterogeneous nuclear ribonucleoproteins A2/B1	323.31	12	50.3	17366000000	12742000000	42997000000	45031000000	1.54782	up-regulated
P23368	ME2	NAD-dependent malic enzyme, mitochondrial	323.31	2	5.2	717310000	699020000	2082800000	3035400000	1.85348	up-regulated
P25705	ATP5A1	ATP synthase subunit alpha, mitochondrial	323.31	12	80.7	9450600000	9907200000	27290000000	29467000000	1.55188	up-regulated
P26358	DNMT1	DNA (cytosine-5)-methyltransferase 1	135.97	7	30	0	314190000	1614200000	1368700000	3.24701	up-regulated
P26583	HMGB2	High mobility group protein B2	323.31	12	53.8	1400000000	1589500000	7869800000	6334300000	2.24833	up-regulated
P29218	IMPA1	Inositol monophosphatase 1	30.736	10	64.8	0	0	221910000	125980000	6.64386	up-regulated
P30040	ERP29	Endoplasmic reticulum resident protein 29	84.45	20	39	744410000	777560000	2653000000	1862000000	1.56879	up-regulated
P30101	PDIA3	Protein disulfide-isomerase A3	323.31	26	69.1	6871400000	7384300000	29160000000	49200000000	2.45858	up-regulated
P31943	HNRNPH1	Heterogeneous nuclear ribonucleoprotein H	323.31	6	15.7	5840700000	3516100000	12341000000	13155000000	1.44618	up-regulated
P32322	PYCR1	Pyrroline-5-carboxylate reductase 1, mitochondrial	152.75	34	67.9	356330000	486560000	1229700000	2147700000	2.0025	up-regulated
P35244	RPA3	Replication protein A 14 kDa subunit	57.887	4	7.5	301320000	416220000	926640000	608010000	1.09678	up-regulated
P35580	MYH10	Myosin-10	323.31	25	53.8	608090000	656570000	4630900000	1361700000	2.24443	up-regulated
P35659	DEK	Protein DEK	141.85	12	32.4	735170000	602000000	1999000000	2318600000	1.69105	up-regulated
P36542	ATP5C1	ATP synthase subunit gamma, mitochondrial	156.53	7	47.8	1140100000	1165600000	2783700000	3031600000	1.33465	up-regulated
P36776	LONP1	Lon protease homolog, mitochondrial	323.31	9	55.4	616780000	1102200000	5149100000	3167500000	2.27444	up-regulated
P36873	PPP1CC	Serine/threonine-protein phosphatase PP1-gamma catalytic subunit	90.052	19	79	208990000	0	530960000	429900000	2.20089	up-regulated
P36957	DLST	Dihydrolipoamide S-succinyltransferase (E2 component of 2-oxo-glutarate complex)	220.21	8	63.6	677930000	933170000	2531000000	2091400000	1.5206	up-regulated
P38606	ATP6V1A	V-type proton ATPase catalytic subunit A	283.16	4	12	569180000	878430000	1787700000	1321700000	1.10296	up-regulated
P39748	FEN1	Flap endonuclease 1	323.31	5	18.5	1015300000	656450000	2750700000	3319200000	1.86031	up-regulated
P42765	ACAA2	3-ketoacyl-CoA thiolase, mitochondrial	323.31	11	34.8	411780000	418040000	5390300000	8860000000	4.10205	up-regulated
P43304	GPD2	Glycerol-3-phosphate dehydrogenase, mitochondrial	160.57	1	7.5	386690000	650550000	2253400000	1345100000	1.79465	up-regulated
P46459	NSF	Vesicle-fusing ATPase	116.57	26	40.8	284830000	376550000	870170000	1414700000	1.78856	up-regulated
P48047	ATP5O	ATP synthase subunit O, mitochondrial	214.92	4	73.7	1358700000	1564600000	4217300000	4042200000	1.49846	up-regulated
P48147	PREP	Prolyl endopeptidase	69.934	10	35.2	0	100060000	386210000	864780000	3.64413	up-regulated
P48735	IDH2	Isocitrate dehydrogenase [NADP], mitochondrial	323.31	17	50.6	402570000	494610000	10507000000	8378500000	4.39574	up-regulated
P49257	LMAN1	Protein ERGIC-53	291.6	22	58.2	408570000	497390000	1293800000	5082500000	2.8152	up-regulated
P49411	TUFM	Elongation factor Tu, mitochondrial	323.31	17	61.5	5725600000	6992600000	14351000000	14760000000	1.19467	up-regulated
P49458	SRP9	Signal recognition particle 9 kDa protein	80.117	21	59.3	678840000	506270000	1427900000	1462100000	1.28605	up-regulated
P51610	HCFC1	Host cell factor 1	161.52	1	3.2	71498000	0	546690000	979680000	4.41606	up-regulated
P51659	HSD17B4	Peroxisomal multifunctional enzyme type 2	323.31	1	43.8	676250000	291830000	2732800000	3399500000	2.66323	up-regulated
P52943	CRIP2	Cysteine rich protein 2	262.88	30	62.2	920750000	1598100000	3537500000	2353700000	1.2258	up-regulated
P55145	MANF	Mesencephalic astrocyte-derived neurotrophic factor	29.742	1	4.2	0	669480000	1739800000	1842900000	2.41993	up-regulated
P62805	HIST1H4F	Histone cluster 1 H4 family member f	323.31	5	15.3	76508000000	52597000000	199590000000	194380000000	1.60954	up-regulated
P62995	TRA2B	Transformer-2 protein homolog beta	205.4	5	35.9	1019700000	1028600000	2182400000	2692000000	1.2508	up-regulated
P82979	SARNP	SAP domain-containing ribonucleoprotein	118.62	12	58.7	281860000	321640000	723120000	774820000	1.31155	up-regulated
P84103	SRSF3	Serine/arginine-rich splicing factor 3	112.99	13	50.3	1517600000	1422800000	3078200000	3989000000	1.26513	up-regulated
P84243	H3F3B	H3 histone, family 3B (H3.3B)	323.31	16	65.8	45796000000	32852000000	98589000000	96605000000	1.31143	up-regulated
Q02218	OGDH	2-oxoglutarate dehydrogenase, mitochondrial	323.31	11	71.5	235030000	1328300000	2872000000	2615400000	1.8115	up-regulated
Q02880	TOP2B	DNA topoisomerase 2-beta	43.92	12	42.7	225520000	86595000	619540000	523720000	1.873	up-regulated
Q05519	SRSF11	Serine/arginine-rich splicing factor 11	47.435	1	75.7	0	0	565720000	453220000	6.64386	up-regulated
Q07065	CKAP4	Cytoskeleton-associated protein 4	323.31	9	46	1651900000	497230000	5134200000	6337300000	2.41623	up-regulated
Q07666	KHDRBS1	KH domain-containing, RNA-binding, signal transduction-associated protein 1	137.02	4	16.8	952300000	730570000	2329000000	2258200000	1.44669	up-regulated
Q07866	KLC1	Kinesin light chain 1	120.04	15	88.1	340310000	207950000	826050000	1058700000	1.78144	up-regulated
Q08945	SSRP1	FACT complex subunit SSRP1	323.31	6	31.8	1722400000	1415500000	3614700000	3510200000	1.18307	up-regulated
Q12765	SCRN1	Secernin-1	85.391	11	38	284430000	468490000	1157700000	1016700000	1.53005	up-regulated
Q12906	ILF3	Interleukin enhancer-binding factor 3	323.31	48	56.7	3726200000	3679500000	7550300000	8192100000	1.08795	up-regulated
Q13242	SRSF9	Serine/arginine-rich splicing factor 9	58.526	12	41.4	479630000	273670000	981400000	2101900000	2.03318	up-regulated
Q14103	HNRNPD	Heterogeneous nuclear ribonucleoprotein D0	323.31	5	15.3	5128100000	5984000000	15894000000	10540000000	1.25026	up-regulated
Q14683	SMC1A	Structural maintenance of chromosomes protein 1A	323.31	5	24.8	243030000	173690000	1152900000	2195600000	3.00636	up-regulated
Q14697	GANAB	Neutral alpha-glucosidase AB	323.31	2	6.2	6781900000	4066000000	14947000000	26229000000	1.92439	up-regulated
Q14839	CHD4	Chromodomain-helicase-DNA-binding protein 4	323.31	3	3.5	601980000	909890000	3559200000	3208400000	2.16231	up-regulated
Q15233	NONO	Non-POU domain-containing octamer-binding protein	323.31	4	34.3	6482000000	5738700000	13763000000	14282000000	1.19842	up-regulated
Q15424	SAFB	Scaffold attachment factor B1	323.31	2	3.8	450770000	539400000	1269800000	1936800000	1.6953	up-regulated
Q16630	CPSF6	Cleavage and polyadenylation specificity factor subunit 6	323.31	8	7.6	428970000	371280000	905530000	878850000	1.1569	up-regulated
Q16643	DBN1	Drebrin	323.31	6	13.6	470980000	889590000	3115700000	2582200000	2.06622	up-regulated
Q16777	HIST2H2AC	Histone H2A type 2-C	323.31	1	2.6	53469000000	35697000000	127800000000	122270000000	1.48777	up-regulated
Q16836	HADH	Hydroxyacyl-coenzyme A dehydrogenase, mitochondrial	323.31	4	13.3	813640000	1769200000	4252200000	5703300000	1.94654	up-regulated
Q5JTV8	TOR1AIP1	Torsin-1A-interacting protein 1	31.369	2	15.2	0	132870000	383560000	244480000	2.24084	up-regulated
Q71U36	TUBA1A	Tubulin alpha-1A chain	197.47	2	15.4	2100300000	2473900000	6700900000	6879000000	1.56988	up-regulated
Q71UI9	H2AFV	Histone H2A.V	130.74	25	45.2	1406600000	1169500000	6134800000	3883000000	1.95931	up-regulated
Q86UE4	MTDH	Protein LYRIC	119.57	5	11.4	0	229840000	489410000	356950000	1.88064	up-regulated
Q86UP2	KTN1	Kinectin	323.31	12	17.1	1034800000	1031200000	2177300000	2171500000	1.07378	up-regulated
Q8IYB3	SRRM1	Serine/arginine repetitive matrix protein 1	49.921	2	7.6	0	0	149850000	194950000	6.64386	up-regulated
Q8N684	CPSF7	Cleavage and polyadenylation specificity factor subunit 7	80.471	8	48.7	152260000	96807000	497140000	569040000	2.09785	up-regulated
Q8NE71	ABCF1	ATP-binding cassette sub-family F member 1	273.12	11	18.2	560580000	639290000	1435900000	1170200000	1.11901	up-regulated
Q8TAQ2	SMARCC2	SWI/SNF complex subunit SMARCC2	173.58	13	15.7	233960000	186630000	768920000	1197700000	2.22523	up-regulated
Q8TEQ6	GEMIN5	Gem-associated protein 5	84.418	2	3.8	0	0	120310000	105390000	6.64386	up-regulated
Q92522	H1FX	Histone H1x	102.14	1	3.1	509520000	374270000	1920700000	1588400000	1.98933	up-regulated
Q92900	UPF1	Regulator of nonsense transcripts 1	84.772	16	27.4	176460000	336690000	1038300000	655660000	1.72295	up-regulated
Q92905	COPS5	COP9 signalosome complex subunit 5	9.6348	8	16.3	0	0	117990000	90204000	6.64386	up-regulated
Q92945	KHSRP	Far upstream element-binding protein 2	323.31	1	9.6	1926800000	2651500000	5372400000	4782900000	1.14935	up-regulated
Q93077	HIST1H2AC	Histone H2A type 1-C	71.498	22	22.7	517240000	293740000	1816300000	1841600000	2.17328	up-regulated
Q969H8	C19orf10	Myeloid-derived growth factor	59.961	3	35.5	410420000	633750000	1302500000	1103800000	1.20446	up-regulated
Q96HS1	PGAM5	Serine/threonine-protein phosphatase PGAM5, mitochondrial	34.487	4	26.6	288500000	164750000	758120000	1010000000	1.96384	up-regulated
Q99459	CDC5L	Cell division cycle 5-like protein	76.463	13	53.1	211870000	454840000	1667400000	775190000	1.87328	up-regulated
Q99714	HSD17B10	3-hydroxyacyl-CoA dehydrogenase type-2	323.31	1	7.4	1616100000	1666100000	5521000000	3983100000	1.53389	up-regulated
Q9BPU6	DPYSL5	Dihydropyrimidinase-related protein 5	208.22	3	14.8	9187200000	4708700000	20744000000	21838000000	1.61558	up-regulated
Q9BTT0	ANP32E	Acidic leucine-rich nuclear phosphoprotein 32 family member E	126.94	4	9.7	294920000	227210000	955940000	740660000	1.70017	up-regulated
Q9BVA1	TUBB2B	Tubulin beta-2B chain	323.31	5	37	2371200000	2697600000	9496000000	15298000000	2.29027	up-regulated
Q9BWD1	ACAT2	Acetyl-CoA acetyltransferase, cytosolic	252.36	17	64.9	259220000	193520000	584410000	3001100000	2.98542	up-regulated
Q9BX68	HINT2	Histidine triad nucleotide-binding protein 2, mitochondrial	215.62	14	50.9	264580000	132010000	534760000	2228900000	2.80086	up-regulated
Q9H2U2	PPA2	Inorganic pyrophosphatase 2, mitochondrial	81.041	2	79.6	117120000	91613000	286480000	406790000	1.73176	up-regulated
Q9H488	POFUT1	GDP-fucose protein O-fucosyltransferase 1	74.226	1	4.7	277250000	253360000	791290000	653600000	1.44524	up-regulated
Q9H9J2	MRPL44	39S ribosomal protein L44, mitochondrial	55.897	7	26	0	0	148180000	200710000	6.64386	up-regulated
Q9NVA2	43719	Septin-11	139.23	2	10.6	91099000	163970000	1079800000	390520000	2.52717	up-regulated
Q9NVI7	ATAD3A	ATPase family AAA domain-containing protein 3A	323.31	24	33.9	286730000	722980000	1913700000	1149000000	1.60086	up-regulated
Q9NYU2	UGGT1	UDP-glucose:glycoprotein glucosyltransferase 1	269.12	2	20.1	61808000	126580000	2368400000	1630700000	4.4079	up-regulated
Q9NZ01	TECR	Very-long-chain enoyl-CoA reductase	117.24	2	3.4	347730000	246350000	918060000	1609600000	2.08907	up-regulated
Q9UQE7	SMC3	Structural maintenance of chromosomes protein 3	240.31	1	16.9	184610000	369660000	1409600000	1454600000	2.36947	up-regulated
Q9Y2V2	CARHSP1	Calcium-regulated heat-stable protein 1	99.645	30	28.5	376680000	324440000	1062000000	1221100000	1.70326	up-regulated
Q9Y3Y2	CHTOP	Chromatin target of PRMT1 protein	19.904	28	23.6	0	159570000	323560000	297030000	1.95945	up-regulated
Q9Y4L1	HYOU1	Hypoxia up-regulated protein 1	323.31	7	52.3	345380000	1072900000	7878800000	18635000000	4.22453	up-regulated
Q9Y696	CLIC4	Chloride intracellular channel protein 4	323.31	15	47.4	326730000	719090000	1485600000	791220000	1.12239	up-regulated

## Sheet: Table S4
Supplementary Table S4: Fourteen differetially expressed proteins that positively correlated with their mRNA											NSCLC cell lines: H1975, A549 SCLC cell lines: H69, H446
mRNA level	Gene name	A549 cells	H1975 cells	H446 cells	H69 cells	SCLC/NSCLC Ratio	Protein expression level	Protein ID	A549 cells	H1975 cells	H446 cells	H69 cells	SCLC/NSCLC Ratio
	ANXA1	13.3219	13.203	8.1465	8.59933	0.631323		ANXA1(P)	35100000000	44000000000	1949700000	3741600000	0.0719507
	ANXA2	14.2382	13.9131	12.6756	12.4048	0.890917		ANXA2(P)	103000000000	53300000000	25000000000	24100000000	0.314139
	FLNB	10.6256	9.33812	6.58639	6.41646	0.651324		FLNB(P)	39400000000	31300000000	1698900000	5805200000	0.10614
	ACAT2	9.50066	8.71046	11.0705	10.9062	1.20677		ACAT2(P)	259220000	193520000	584410000	3001100000	7.91958
	PSIP1	9.72398	8.90404	12.3659	12.1502	1.31608		PSIP1(P)	619360000	232680000	7198900000	5764800000	15.2149
	TCERG1	5.07764	4.98036	5.95334	6.29258	1.21753		TCERG1(P)	117220000	69342000	367030000	969900000	7.16614
	APRT	9.19356	9.5645	7.84033	7.68432	0.827626		APRT(P)	1411100000	2980100000	513370000	637900000	0.262177
	DPYSL5	3.68604	3.83072	6.72979	6.41212	1.74835		DPYSL5(P)	9187200000	4708700000	20700000000	21800000000	3.05846
	TUBA1A	12.1081	12.635	14.1071	14.2573	1.14636		TUBA1A(P)	2100300000	2473900000	6700900000	6880000000	2.96902
	ME2	8.14142	7.86721	9.43355	9.24069	1.16651		ME2(P)	717310000	699020000	2082800000	3035400000	3.61371
	HNRNPA2B1	8.73214	8.83443	10.3343	10.663	1.1953		HNRNPA2B1(P)	17400000000	12700000000	43000000000	45000000000	2.92359
	AKR1B1	13.7862	13.3699	10.8161	11.1573	0.809151		AKR1B1(P)	21600000000	13100000000	4070600000	2147400000	0.179193
	ANP32E	10.1441	10.3841	11.8639	11.4256	1.13451		ANP32E(P)	294920000	227210000	955940000	740660000	3.24938
	TXNDC17	7.34629	6.90276	5.67362	5.53429	0.786572		TXNDC17(P)	1041900000	1317300000	459440000	235280000	0.294473
